# Supplementary material for: Structural guidelines for stabilization of α-helical coiled coils via PEG stapling
Source: Royal Society of Chemistry journal article supplement (doi:10.1039/d1cb00237f), 2022-01-01
Supplement: d1cb00237f1.pdf [file d1cb00237f1.pdf]

## Structural Guidelines for Stabilization of $\alpha$ -Helical Coiled Coils via PEG Stapling

Qiang Xiao, Zachary B. Jones, Samantha C. Hatfield, Dallin S. Ashton, Nicholas A. Dalley, Cody D. Dyer, Judah L. Evangelista, and Joshua L. Price\*

### Electronic Supplementary Information

|                                                                                                                            |    |
|----------------------------------------------------------------------------------------------------------------------------|----|
| 1. Structures of coiled-coil and affibody variants.....                                                                    | 2  |
| 2. Synthesis of coiled-coil and affibody variants.....                                                                     | 10 |
| 3. Mass Spectrometry Data .....                                                                                            | 11 |
| 4. Analytical HPLC data .....                                                                                              | 42 |
| 5. Global Fitting of Variable Temperature CD Data .....                                                                    | 50 |
| 6. Proteolysis of coiled-coil variants .....                                                                               | 70 |
| 7. Fluorescence polarization binding assay.....                                                                            | 75 |
| 8. Stapling between heterochiral residues.....                                                                             | 77 |
| 9. Synthesis and Characterization of PEGylated Asparagine Derivatives, bis-azido PEG, branched Y-shaped bis-azido PEG..... | 77 |

## 1. Structures of coiled-coil and affibody variants

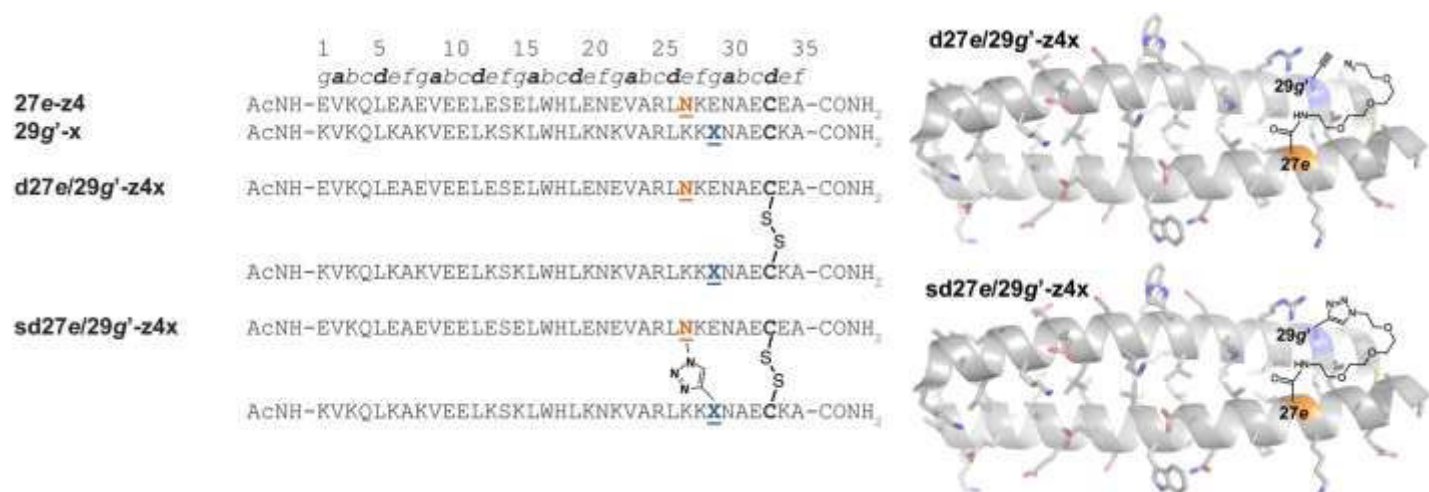

**Figure S1.** Sequences of (A) acidic monomer **27e-z4**, basic monomer **29g'-x**, disulfide-bound coiled-coil heterodimer **d27e/29g'-z4x**, and its stapled counterpart **sd27e/29g'-z4x**. **X** represents propargyl glycine; **N** represents an azido-terminated PEG-modified Asn residue. Also shown are the structures of the side chains of **X** and **N** and their stapled counterpart superimposed on the ribbon diagram of parent disulfide-bonded heterodimer **A/B** (PDB ID: 1KD9). Side chains are shown as sticks; position **27e** is highlighted in orange, whereas position **29g'** is highlighted in blue. Variants **d27e/29g'-z4x** and **sd27e/29g'-z4x** are from reference <sup>1</sup>. The PEG oligomer(s) within each variant have the number of ethylene oxide units indicated in the structural drawings and in the compound names.

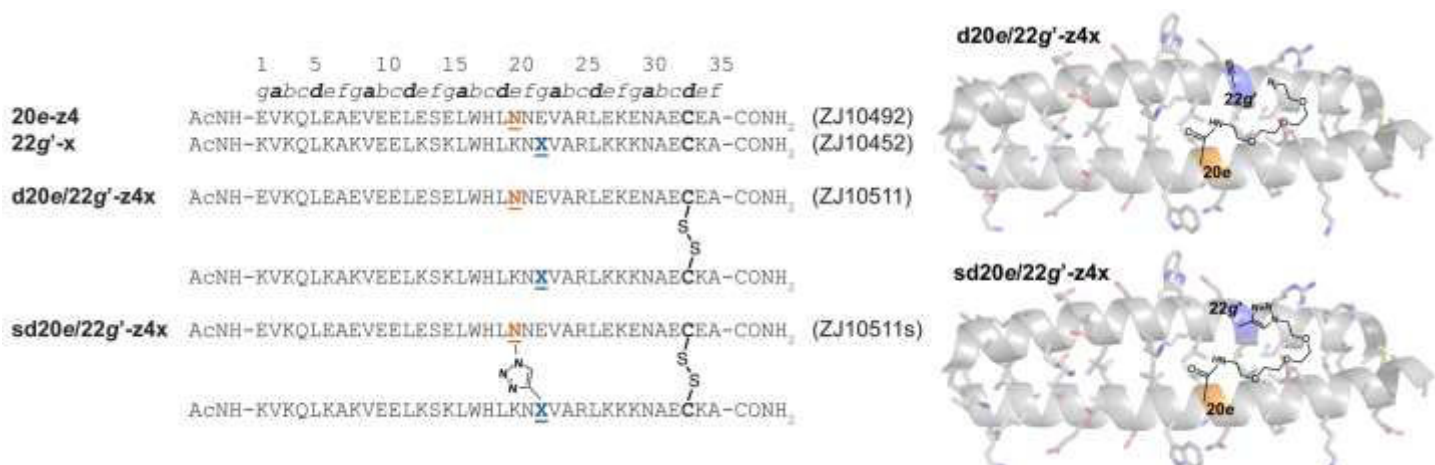

**Figure S2.** Sequences of (A) acidic monomer **20e-z4**, basic monomer **22g'-x**, disulfide-bound coiled-coil heterodimer **d20e/22g'-z4x**, and its stapled counterpart **sd20e/22g'-z4x**. **X** represents propargyl glycine; **N** represents an azido-terminated PEG-modified Asn residue. Also shown are the structures of the side chains of **X** and **N** and their stapled counterpart superimposed on the ribbon diagram of parent disulfide-bonded heterodimer **A/B** (PDB ID: 1KD9). Side chains are shown as sticks; position **20e** is highlighted in orange, whereas position **22g'** is highlighted in blue. The PEG oligomer(s) within each variant have the number of ethylene oxide units indicated in the structural drawings and in the compound names. Numbers in parentheses indicate notebook numbers associated with each compound.

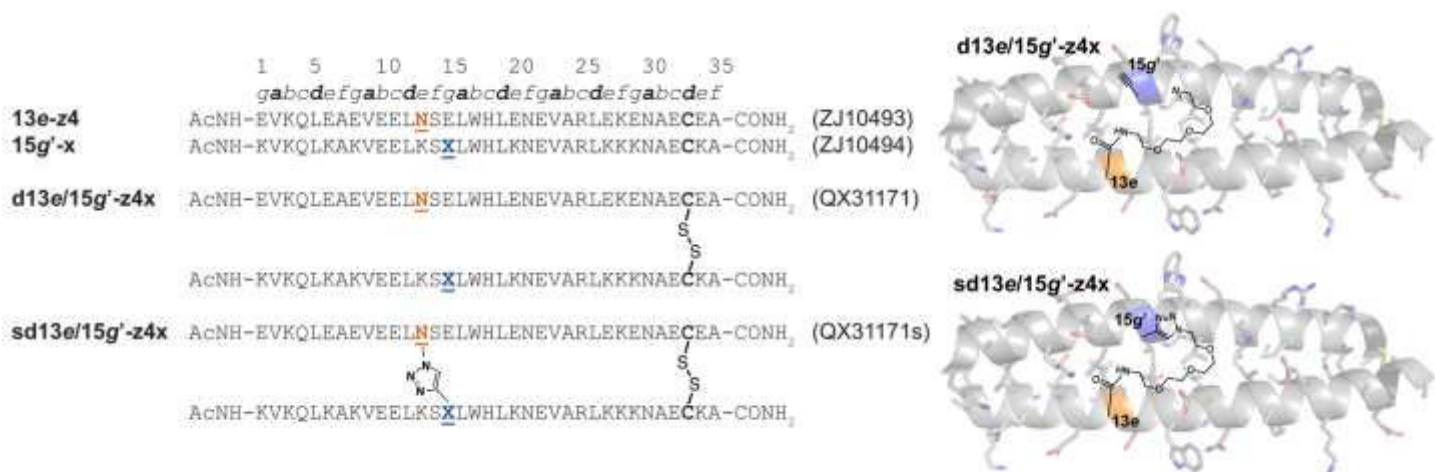

**Figure S3.** Sequences of (A) acidic monomer **13e-z4**, basic monomer **15g'-x**, disulfide-bound coiled-coil heterodimer **d13e/15g'-z4x**, and its stapled counterpart **sd13e/15g'-z4x**. X represents propargyl glycine; N represents an azido-terminated PEG-modified Asn residue. Also shown are the structures of the side chains of X and N and their stapled counterpart superimposed on the ribbon diagram of parent disulfide-bonded heterodimer **A/B** (PDB ID: 1KD9). Side chains are shown as sticks; position **13e** is highlighted in orange, whereas position **15g'** is highlighted in blue. The PEG oligomer(s) within each variant have the number of ethylene oxide units indicated in the structural drawings and in the compound names. Numbers in parentheses indicate notebook numbers associated with each compound.

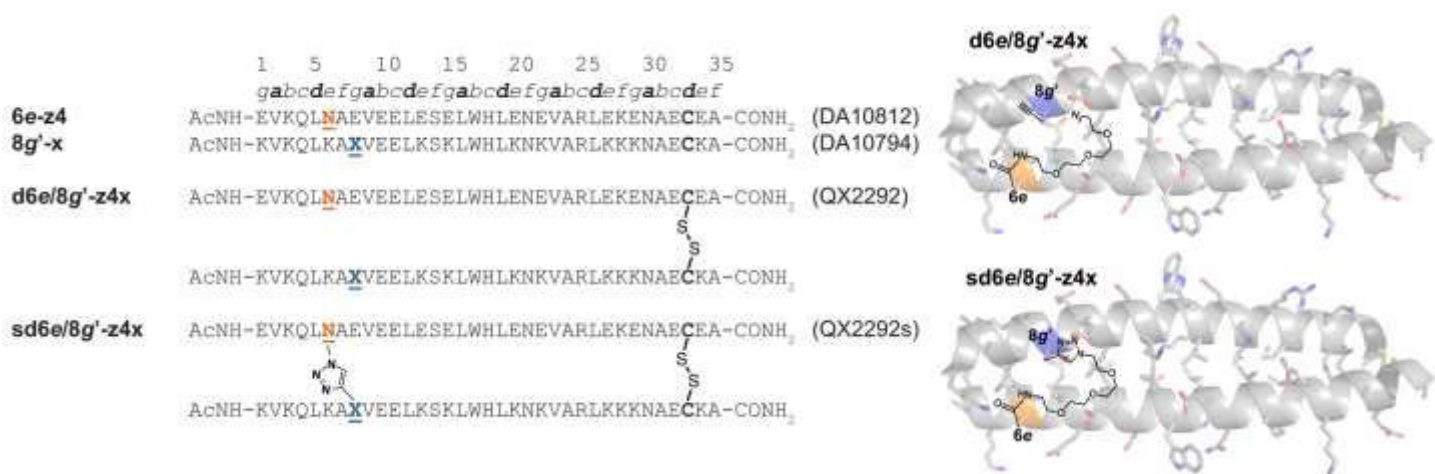

**Figure S4.** Sequences of (A) acidic monomer **6e-z4**, basic monomer **8g'-x**, disulfide-bound coiled-coil heterodimer **d6e/8g'-z4x**, and its stapled counterpart **sd6e/8g'-z4x**. X represents propargyl glycine; N represents an azido-terminated PEG-modified Asn residue. Also shown are the structures of the side chains of X and N and their stapled counterpart superimposed on the ribbon diagram of parent disulfide-bonded heterodimer **A/B** (PDB ID: 1KD9). Side chains are shown as sticks; position **6e** is highlighted in orange, whereas position **8g'** is highlighted in blue. The PEG oligomer(s) within each variant have the number of ethylene oxide units indicated in the structural drawings and in the compound names. Numbers in parentheses indicate notebook numbers associated with each compound.

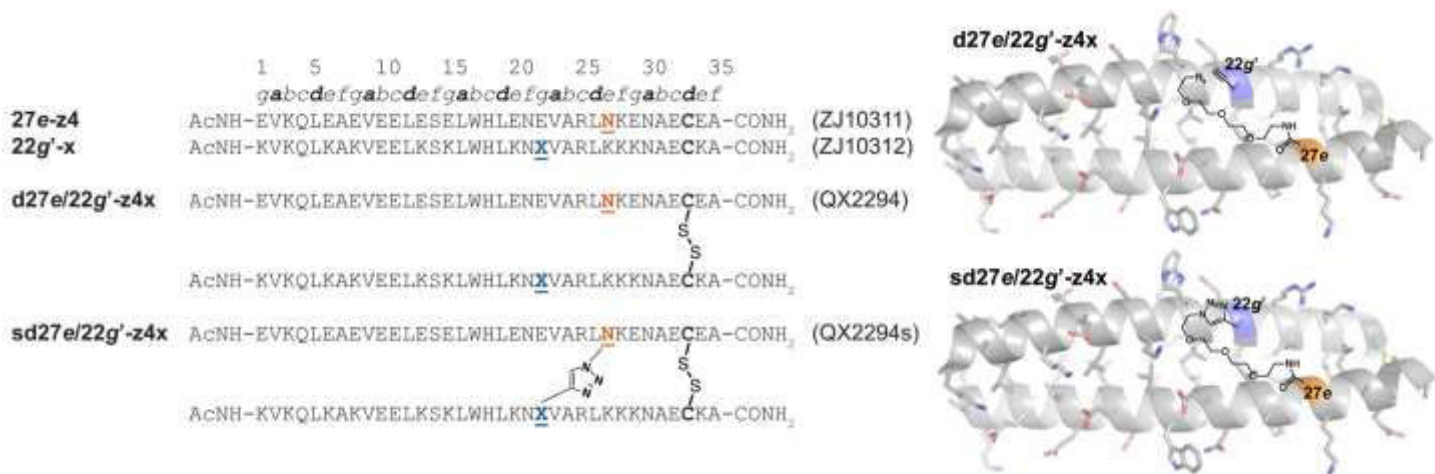

**Figure S5.** Sequences of (A) acidic monomer **27e-z4**, basic monomer **22g'-x**, disulfide-bound coiled-coil heterodimer **d27e/22g'-z4x**, and its stapled counterpart **sd27e/22g'-z4x**. **X** represents propargyl glycine; **N** represents an azido-terminated PEG-modified Asn residue. Also shown are the structures of the side chains of **X** and **N** and their stapled counterpart superimposed on the ribbon diagram of parent disulfide-bonded heterodimer **A/B** (PDB ID: 1KD9). Side chains are shown as sticks; position **27e** is highlighted in orange, whereas position **22g'** is highlighted in blue. The PEG oligomer(s) within each variant have the number of ethylene oxide units indicated in the structural drawings and in the compound names. Numbers in parentheses indicate notebook numbers associated with each compound.

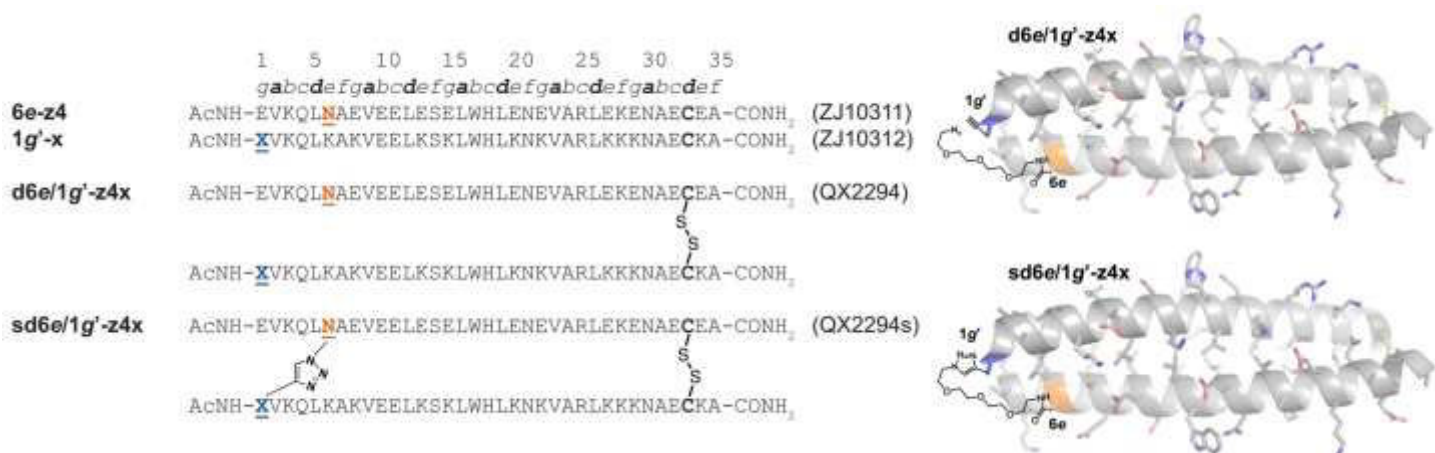

**Figure S6.** Sequences of (A) acidic monomer **6e-z4**, basic monomer **1g'-x**, disulfide-bound coiled-coil heterodimer **d6e/1g'-z4x**, and its stapled counterpart **sd6e/1g'-z4x**. **X** represents propargyl glycine; **N** represents an azido-terminated PEG-modified Asn residue. Also shown are the structures of the side chains of **X** and **N** and their stapled counterpart superimposed on the ribbon diagram of parent disulfide-bonded heterodimer **A/B** (PDB ID: 1KD9). Side chains are shown as sticks; position **6e** is highlighted in orange, whereas position **1g'** is highlighted in blue. The PEG oligomer(s) within each variant have the number of ethylene oxide units indicated in the structural drawings and in the compound names. Numbers in parentheses indicate notebook numbers associated with each compound.

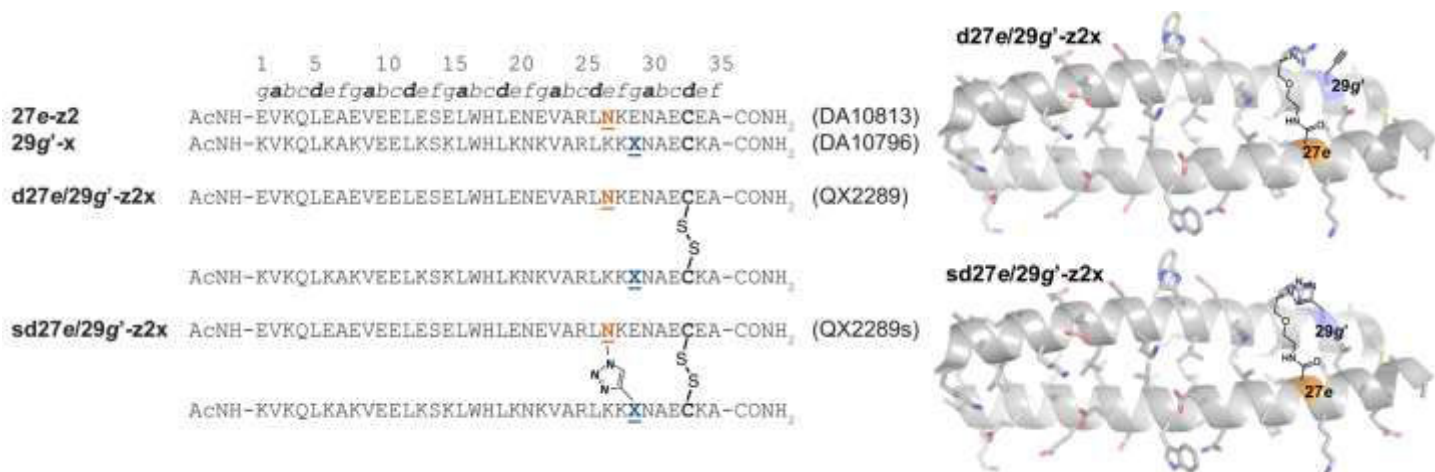

**Figure S7.** Sequences of (A) acidic monomer **27e-z2**, basic monomer **29g'-x**, disulfide-bound coiled-coil heterodimer **d27e/29g'-z2x**, and its stapled counterpart **sd27e/29g'-z2x**. X represents propargyl glycine; N represents an azido-terminated PEG-modified Asn residue. Also shown are the structures of the side chains of X and N and their stapled counterpart superimposed on the ribbon diagram of parent disulfide-bonded heterodimer **A/B** (PDB ID: 1KD9). Side chains are shown as sticks; position **27e** is highlighted in orange, whereas position **29g'** is highlighted in blue. The PEG oligomer(s) within each variant have the number of ethylene oxide units indicated in the structural drawings and in the compound names. Numbers in parentheses indicate notebook numbers associated with each compound.

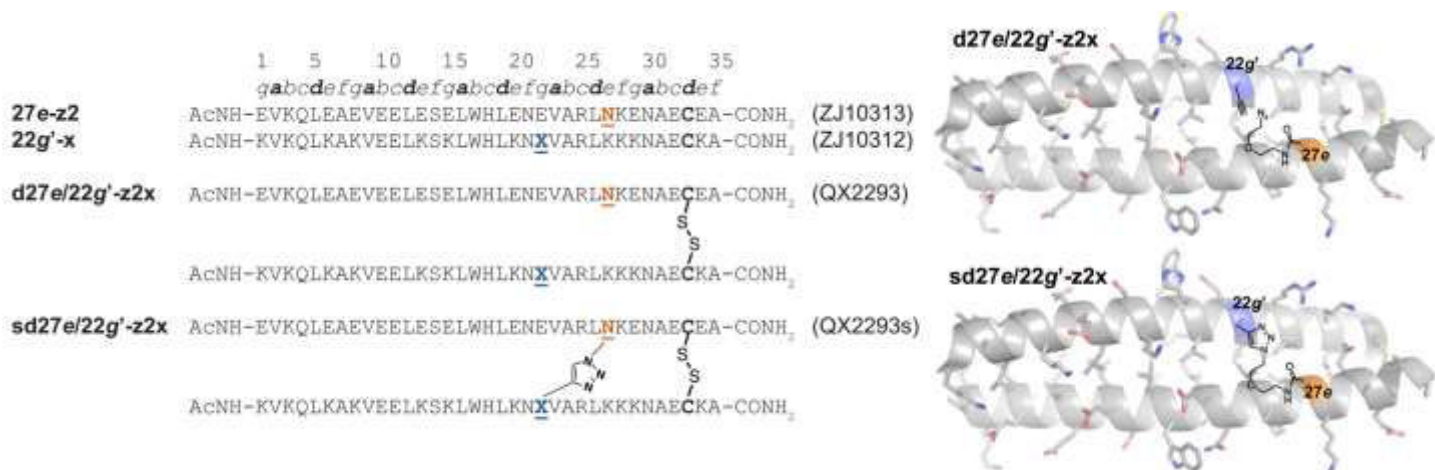

**Figure S8.** Sequences of (A) acidic monomer **27e-z2**, basic monomer **22g'-x**, disulfide-bound coiled-coil heterodimer **d27e/22g'-z2x**, and its stapled counterpart **sd27e/22g'-z2x**. X represents propargyl glycine; N represents an azido-terminated PEG-modified Asn residue. Also shown are the structures of the side chains of X and N and their stapled counterpart superimposed on the ribbon diagram of parent disulfide-bonded heterodimer **A/B** (PDB ID: 1KD9). Side chains are shown as sticks; position **27e** is highlighted in orange, whereas position **22g'** is highlighted in blue. The PEG oligomer(s) within each variant have the number of ethylene oxide units indicated in the structural drawings and in the compound names. Numbers in parentheses indicate notebook numbers associated with each compound.

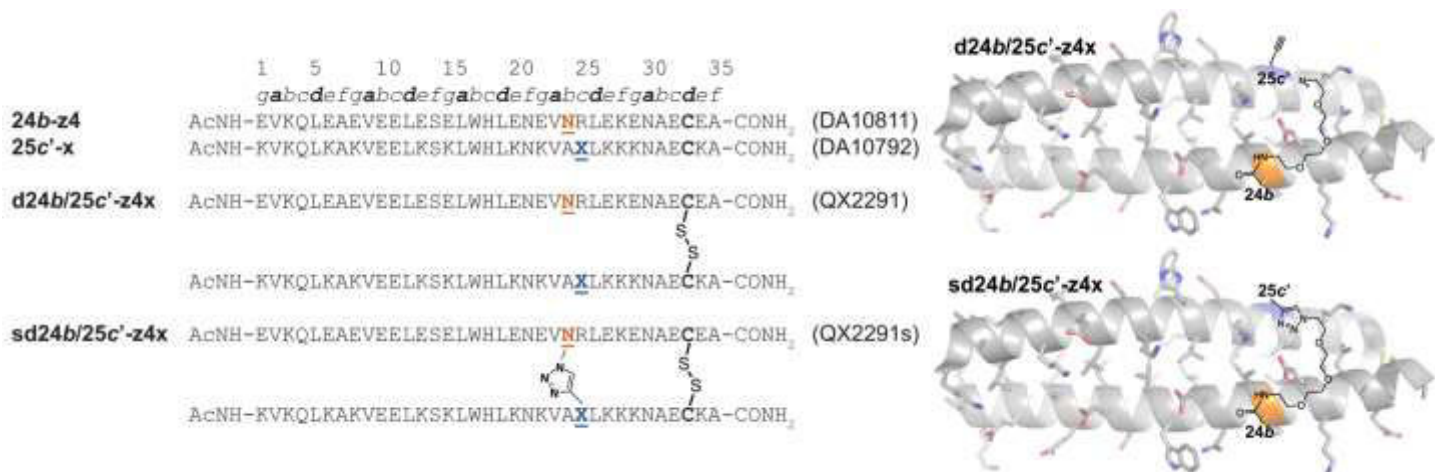

**Figure S9.** Sequences of (A) acidic monomer **24b-z4**, basic monomer **25c'-x**, disulfide-bound coiled-coil heterodimer **d24b/25c'-z4x**, and its stapled counterpart **sd24b/25c'-z4x**. X represents propargyl glycine; N represents an azido-terminated PEG-modified Asn residue. Also shown are the structures of the side chains of X and N and their stapled counterpart superimposed on the ribbon diagram of parent disulfide-bonded heterodimer **A/B** (PDB ID: 1KD9). Side chains are shown as sticks; position **27e** is highlighted in blue, whereas position **29g'** is highlighted in orange. The PEG oligomer(s) within each variant have the number of ethylene oxide units indicated in the structural drawings and in the compound names. Numbers in parentheses indicate notebook numbers associated with each compound.

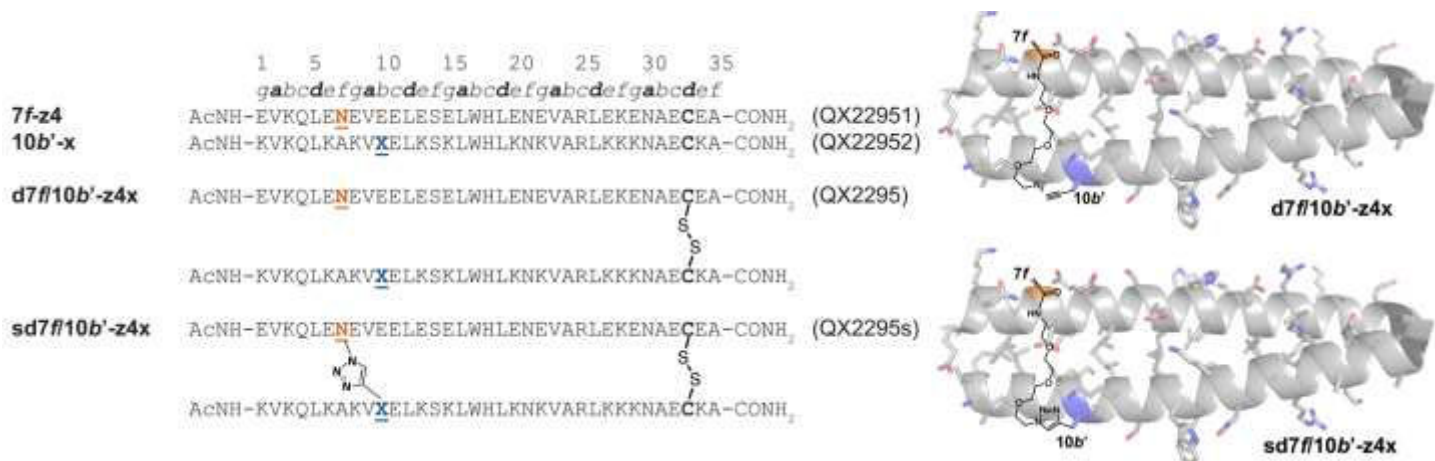

**Figure S10.** Sequences of (A) acidic monomer **7f-z4**, basic monomer **10b'-x**, disulfide-bound coiled-coil heterodimer **d7f/10b'-z4x**, and its stapled counterpart **sd7f/10b'-z4x**. X represents propargyl glycine; N represents an azido-terminated PEG-modified Asn residue. Also shown are the structures of the side chains of X and N and their stapled counterpart superimposed on the ribbon diagram of parent disulfide-bonded heterodimer **A/B** (PDB ID: 1KD9). Side chains are shown as sticks; position **7f** is highlighted in orange, whereas position **10b'** is highlighted in blue. The PEG oligomer(s) within each variant have the number of ethylene oxide units indicated in the structural drawings and in the compound names. Numbers in parentheses indicate notebook numbers associated with each compound.

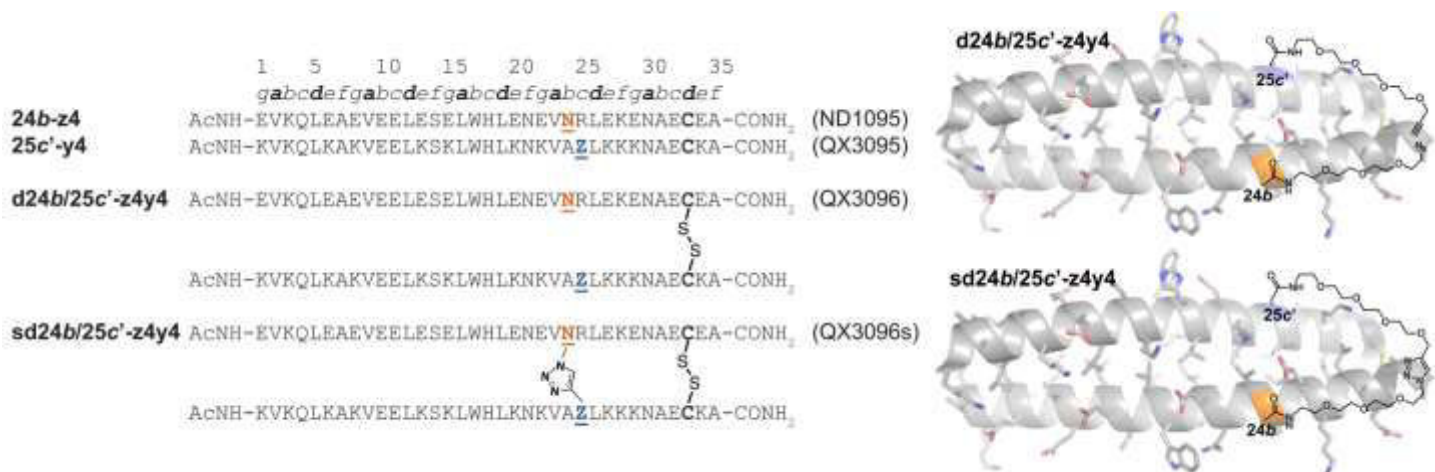

**Figure S11.** Sequences of (A) acidic monomer **24b-z4**, basic monomer **25c'-y4**, disulfide-bound coiled-coil heterodimer **d24b/25c'-z4y4**, and its stapled counterpart **d24b/25c'-z4y4**. Z represents an alkyne-terminated PEG-modified Asn residue; N represents an azido-terminated PEG-modified Asn residue. Also shown are the structures of the side chains of Z and N and their stapled counterpart superimposed on the ribbon diagram of parent disulfide-bonded heterodimer **A/B** (PDB ID: 1KD9). Side chains are shown as sticks; position **24b** is highlighted in orange, whereas position **25c'** is highlighted in blue. The PEG oligomer(s) within each variant have the number of ethylene oxide units indicated in the structural drawings and in the compound names. Numbers in parentheses indicate notebook numbers associated with each compound.

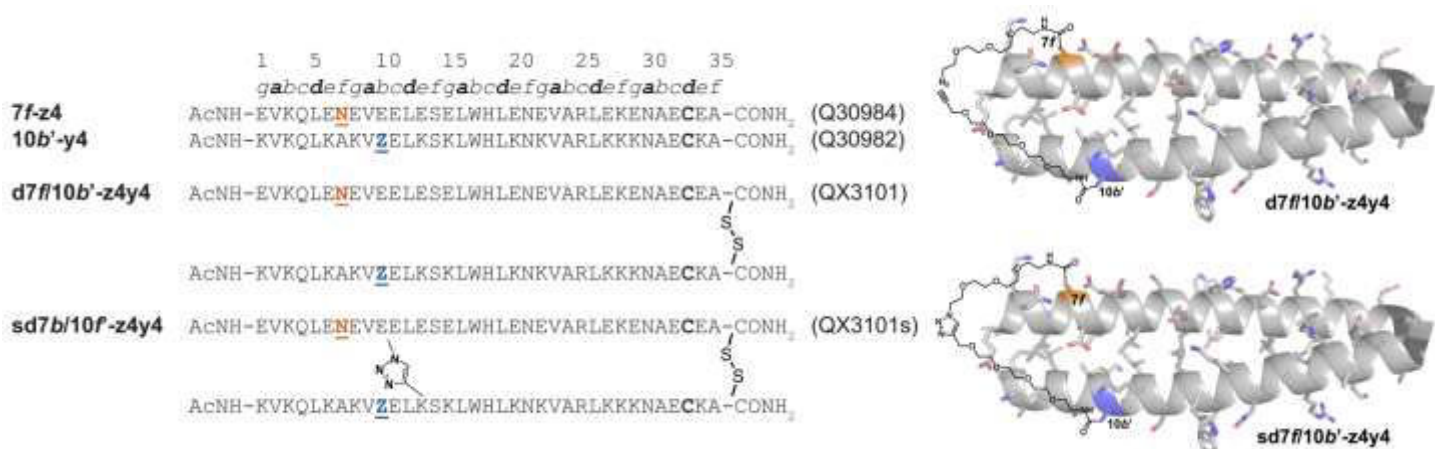

**Figure S12.** Sequences of (A) acidic monomer **7f-z4**, basic monomer **10b'-y4**, disulfide-bound coiled-coil heterodimer **d7f/10b'-z4y4**, and its stapled counterpart **d7f/10b'-z4y4**. Z represents an alkyne-terminated PEG-modified Asn residue; N represents an azido-terminated PEG-modified Asn residue. Also shown are the structures of the side chains of Z and N and their stapled counterpart superimposed on the ribbon diagram of parent disulfide-bonded heterodimer **A/B** (PDB ID: 1KD9). Side chains are shown as sticks; position **7f** is highlighted in orange, whereas position **10b'** is highlighted in blue. The PEG oligomer(s) within each variant have the number of ethylene oxide units indicated in the structural drawings and in the compound names. Numbers in parentheses indicate notebook numbers associated with each compound.

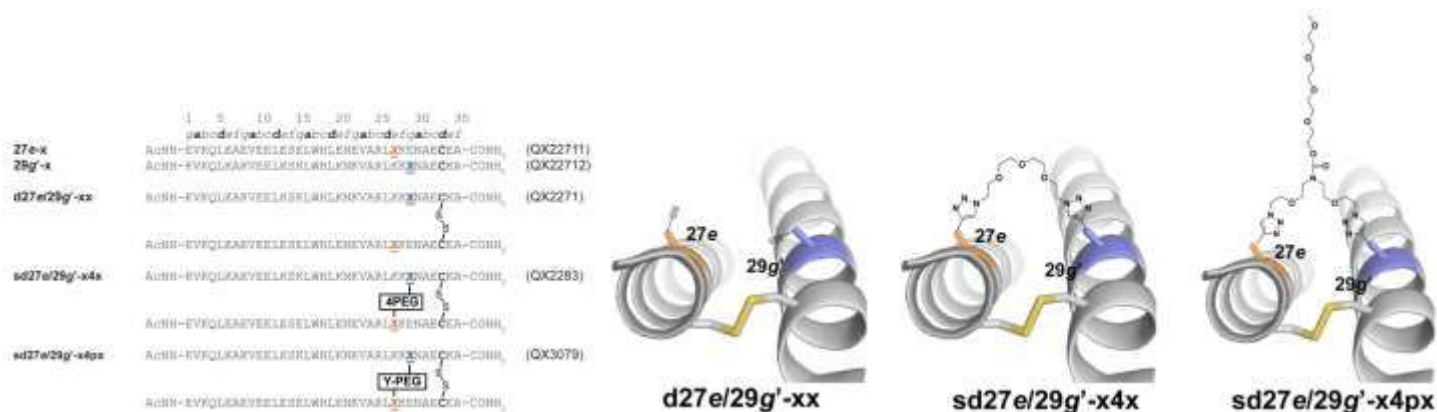

**Figure S13.** Sequences of disulfide-bound coiled-coil heterodimer **d27e/29g'-xx**; its bis-triazole-stapled counterpart **sd27e/29g'-x4x**; branched PEG bis-triazole-stapled counterpart **sd27e/29g'-x4px**; and their component cysteine-containing acidic and basic monomers. **X** represents propargyl glycine; The structure of the **X** residues within each variant are shown in their non-stapled and stapled forms superimposed on the ribbon diagram of A/B with the residue on peptide A highlighted in orange and the residue on peptide B highlighted in blue. The PEG oligomer(s) within each variant have the number of ethylene oxide units indicated in the structural drawings and in the compound names. Numbers in parentheses indicate notebook numbers associated with each compound.

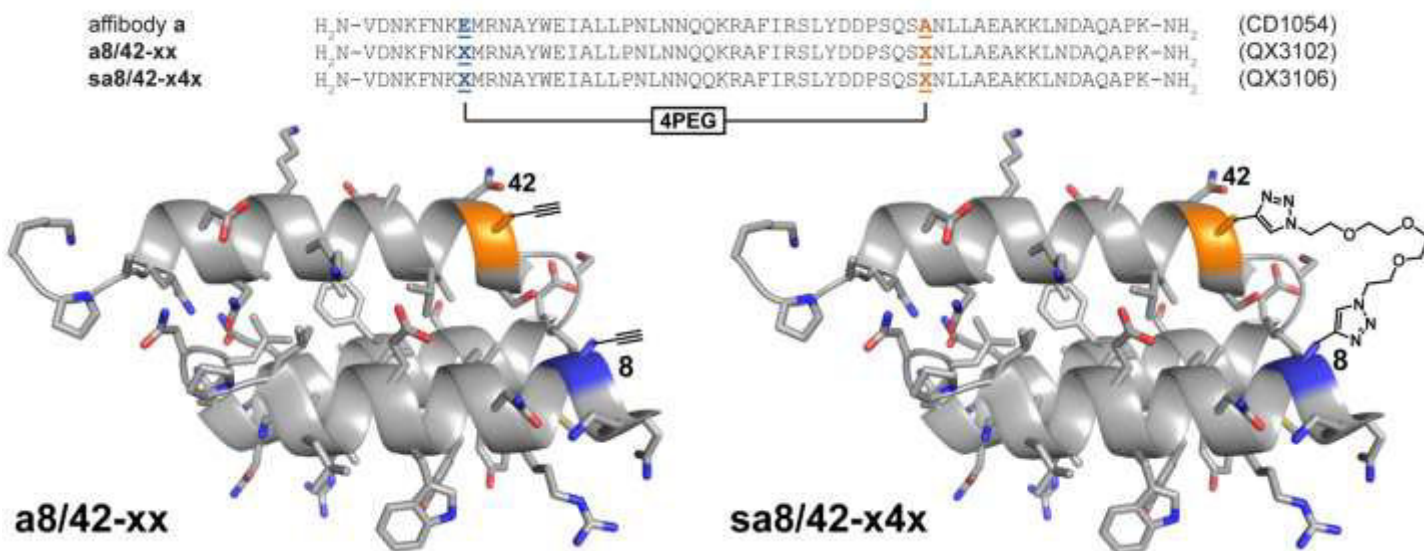

**Figure S14.** Sequences of native affibody **a** (PDB ID: 3MZW), non-stapled variant **a8/42-xx**; and its bis-triazole-stapled counterpart **sa8/42-x4x**. **X** represents propargyl glycine; The structure of the **X** residues within each variant are shown in their non-stapled and stapled forms superimposed on the ribbon diagram of **a** with position 8 highlighted in blue and position 42 highlighted in orange. The PEG oligomer staple has the number of ethylene oxide units indicated in the structural drawing and in the compound name. Numbers in parentheses indicate notebook numbers associated with each compound.



**Modelling of z4x, z2x, z4y4, and x4x staples:** We generated models for the z4x, z2x, z4y4, and x4x staples 2 in GaussView 6.0 based on the structures in main text Figure 2, but with *N*'-acetyl amino acid *N*-methyl amides on either end of the staple. We then optimized these model structure in Gaussian 16 using density functional theory (APFD) calculations with the 6-31G+d,p basis set. These optimized structures are shown below in Figure S15. We used the distance between the  $\beta$ -carbons on either end of each staple as an estimate of the distance that could be comfortably spanned by that staple. These distances appear in main text Table 1 and in ESI Table S2.

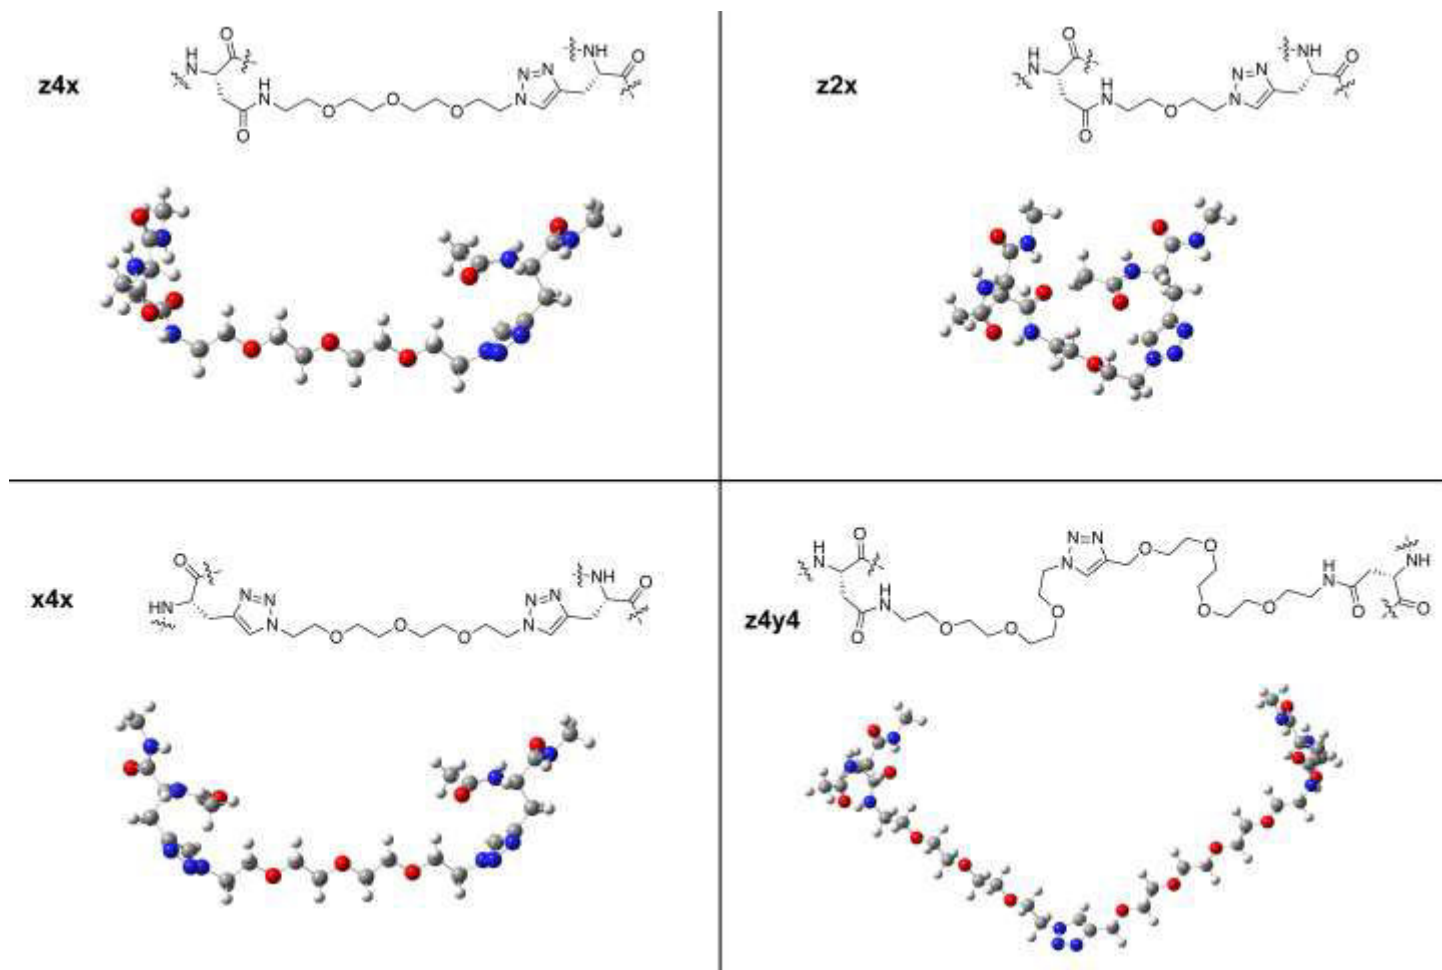

**Figure S15.** Drawings of staples z4x, z2x, x4x, and z4y4, along with ball-and-stick images of optimized model staples based on z4x, z2x, x4x, and z4y4. Models were built in GaussView 6.0 and optimized via DFT calculations (APFD) using the 6-31G+d,p basis set.

## 2. Synthesis of coiled-coil and affibody variants

**Peptide Synthesis:** Monomers **20e-z4** (ZJ10492); **22g'-x** (ZJ10452); **13e-z4** (ZJ10493); **15g'-x** (ZJ10494); **6e-z4** (DA10812, QX31101); **8g'-x** (DA10794); **27e-z4** (ZJ10311); **22g'-x** (ZJ10312); **1g'-x** (QX31102); **24b-z4** (DA10811, ND1095); **25c'-x** (DA10792); **25c'-y4** (QX3095); **7f-z4** (QX22951, QX30984); **10b'-x** (QX22952); **10b'-y4** (QX30982); **27e-z2** (DA10813, ZJ10313); **29g'-x** (DA10796, QX22712); **27e-x** (QX22711); and affibody variants **a** (CD1054) and **a8/42-xx** (QX3102) were prepared as C-terminal amides on Rink amide MBHA LL resin (EMD Biosciences), by microwave-assisted solid phase peptide synthesis using a standard Fmoc N $\alpha$  protection strategy as described previously.<sup>2</sup> Fmoc-protected amino acids were purchased from Advanced Chem Tech, except for the PEGylated asparagine derivatives, which were synthesized as described previously<sup>1</sup> or in section 7 below. Fluorescent affibody variants **fa** (ZJ10611); **fa8/42-xx** (ZJ10612); and **fsa8/42-x4x** (ZJ1062) were synthesized in a similar process until the final amino acid following which 5(6)-Carboxyfluorescein was coupled to the peptide N-terminus through activation with standard Oxyma/DIC protocols. Peptides were cleaved from resin and purified by preparative reverse-phase high-performance liquid chromatography (HPLC) on a C18 column using a linear gradient of water in acetonitrile with 0.1% v/v trifluoroacetic acid. Peptide identity was confirmed by electrospray ionization time- of-flight mass spectrometry.

**Disulfide formation in the coiled-coil heterodimer:** We prepared disulfide-bonded coiled-coil heterodimers **d20e/22g'-z4x** (ZJ10511); **d13e/15g'-z4x** (QX31171); **d6e/8g'-z4x** (QX2292); **d27e/22g'-z4x** (QX2294); **d6e/1g'-z4x** (QX31172); **d24b/25c'-z4x** (QX2291); **d24b/25c'-z4y4** (QX3096); **d7f/10b'-z4x** (QX2295); **d7f/10b'-z4y4** (QX3101); **d27e/29g'-z2x** (QX2289); **d27e/22g'-z2x** (QX2293); **d27e/29g'-xx** (QX2271) by mixing their purified cysteine-containing precursors in a 1:1 ratio in an aqueous solution of ammonium bicarbonate (8 mg/mL) with exposure to air for 3 hrs. Reaction completeness was monitored by analytical HPLC. Disulfide-bonded coiled-coil heterodimers were then purified by preparative HPLC and characterized by ESI-TOF MS.

**Stapling via copper-catalyzed azide/alkyne cycloaddition (CuAAC):** We prepared triazole-stapled variants **sd20e/22g'-z4x** (ZJ10511s); **sd13e/15g'-z4x** (QX31171s); **sd6e/8g'-z4x** (QX2292s); **sd27e/22g'-z4x** (QX2294s); **sd6e/1g'-z4x** (QX31172s); **sd24b/25c'-z4x** (QX2291s); **sd24b/25c'-z4y4** (QX3096s); **sd7f/10b'-z4x** (QX2295s); **sd7f/10b'-z4y4** (QX3101s); **sd27e/29g'-z2x** (QX2289s); **sd27e/22g'-z2x** (QX2293s) by stirring their purified non-stapled precursors in 2:1 (v/v) water/*tert*-butanol with 10 eq. copper sulfate pentahydrate and 10 eq. sodium ascorbate at 40 Celsius degree for 2 hours. The reaction was monitored by analytical HPLC, where we observed small changes in retention time upon stapling. The triazole-stapled variants were purified via preparative HPLC.

**Two-component stapling via copper-catalyzed azide/alkyne cycloaddition (CuAAC):** We prepared triazole-stapled variants **sd27e/29g'-x4x** (QX2283), **sa8/42-x4x** (QX3106), **fsa8/42-x4x** (ZJ1062), and **sd27e/29g'-x4px** (QX3079) by stirring their non-stapled precursors **d27e/29g'-xx** (QX2271), **a8/42-xx** (QX3102), and **fa8/42-xx** (ZJ10612), respectively, in 2:1 (v/v) water/*tert*-butanol with 1.5 eq. of previously synthesized four-unit bis-azido PEG **4**<sup>1</sup> or four-unit bis-azido Y-shaped PEG **4p** (QX3075; synthesis described in section 10 below), 10 eq. copper sulfate pentahydrate and 10 eq. sodium ascorbate at 40 °C for 2 hours. The reaction was monitored by analytical HPLC, where we observed small changes in retention time upon stapling. The triazole-stapled variants were purified via preparative HPLC.

The CuAAC reaction does not change the mass of the monomeric triazole-stapled variants **sd20e/22g'-z4x** (ZJ10511s); **sd13e/15g'-z4x** (QX31171s); **sd6e/8g'-z4x** (QX2292s); **sd27e/22g'-z4x** (QX2294s); **sd6e/1g'-z4x** (QX31172s); **sd24b/25c'-z4x** (QX2291s); **sd24b/25c'-z4y4** (QX3096s); **sd7f/10b'-z4x** (QX2295s); **sd7f/10b'-z4y4** (QX3101s); **sd27e/29g'-z2x** (QX2289s); **sd27e/22g'-z2x** (QX2293s) relative to their non-stapled azide/alkyne precursors **d20e/22g'-z4x** (ZJ10511); **d13e/15g'-z4x** (QX31171); **d6e/8g'-z4x** (QX2292); **d27e/22g'-z4x** (QX2294); **d6e/1g'-z4x** (QX31172); **d24b/25c'-z4x** (QX2291); **d24b/25c'-z4y4** (QX3096); **d7f/10b'-z4x** (QX2295); **d7f/10b'-z4y4** (QX3101); **d27e/29g'-z2x** (QX2289); and **d27e/22g'-z2x** (QX2293). To confirm the completion of the CuAAC reaction, we subjected each azide-containing non-stapled variant and its triazole-stapled counterpart separately to a solution of dithiothreitol (DTT, 15 mg) in 100 µL water, followed by incubation at room temperature for 8 hours. In all cases, the unstapled variants were reduced to their corresponding monomers with DTT addition, for the triazole-stapled variants, the dimer still existed as dimer after the DTT treatment, indicating the formation of covalent linkage between monomers.

### 3. Mass Spectrometry Data

Mass spectra appear in Figures S16–S84; data are summarized in Table S1.

**Table S1.** Summary of the mass spectrum data for stapled disulfide-bonded coiled-coil heterodimers, their non-stapled counterparts, and their monomer components.

| Name                   | Notebook Number | Molecular Formula                                                                  | z | Expected [M+z·H]/z | Observed [M+z·H]/z |
|------------------------|-----------------|------------------------------------------------------------------------------------|---|--------------------|--------------------|
| <b>20e-z4</b>          | ZJ10492         | C <sub>185</sub> H <sub>295</sub> N <sub>51</sub> O <sub>68</sub> S                | 4 | 1088.781           | 1088.770           |
| <b>22g'-x</b>          | ZJ10452         | C <sub>187</sub> H <sub>324</sub> N <sub>56</sub> O <sub>46</sub> S                | 4 | 1031.620           | 1031.596           |
| <b>d20e/22g'-z4x</b>   | ZJ10511         | C <sub>372</sub> H <sub>617</sub> N <sub>107</sub> O <sub>114</sub> S <sub>2</sub> | 8 | 1059.948           | 1060.066           |
| <b>sd20e/22g'-z4x</b>  | ZJ10511s        | C <sub>372</sub> H <sub>617</sub> N <sub>107</sub> O <sub>114</sub> S <sub>2</sub> | 8 | 1059.948           | 1060.086           |
|                        | ZJ10511s + DTT  | C <sub>372</sub> H <sub>619</sub> N <sub>107</sub> O <sub>114</sub> S <sub>2</sub> | 8 | 1060.200           | 1060.572           |
| <b>13e-z4</b>          | ZJ10493         | C <sub>185</sub> H <sub>295</sub> N <sub>51</sub> O <sub>68</sub> S                | 4 | 1088.781           | 1088.763           |
| <b>15g'-x</b>          | ZJ10494         | C <sub>187</sub> H <sub>324</sub> N <sub>56</sub> O <sub>46</sub> S                | 4 | 1031.620           | 1031.601           |
| <b>d13e/15g'-z4x</b>   | QX31171         | C <sub>372</sub> H <sub>617</sub> N <sub>107</sub> O <sub>114</sub> S <sub>2</sub> | 8 | 1059.948           | 1060.086           |
| <b>sd13e/15g'-z4x</b>  | QX31171s        | C <sub>372</sub> H <sub>617</sub> N <sub>107</sub> O <sub>114</sub> S <sub>2</sub> | 7 | 1211.225           | 1211.195           |
|                        | + DTT           | C <sub>372</sub> H <sub>619</sub> N <sub>107</sub> O <sub>114</sub> S <sub>2</sub> | 8 | 1060.200           | 1060.851           |
| <b>6e-z4</b>           | DA10812         | C <sub>185</sub> H <sub>295</sub> N <sub>51</sub> O <sub>68</sub> S                | 4 | 1088.781           | 1088.783           |
| <b>8g'-x</b>           | DA10794         | C <sub>187</sub> H <sub>324</sub> N <sub>56</sub> O <sub>46</sub> S                | 4 | 1031.620           | 1031.619           |
| <b>d6e/8g'-z4x</b>     | QX2292          | C <sub>372</sub> H <sub>617</sub> N <sub>107</sub> O <sub>114</sub> S <sub>2</sub> | 8 | 1059.948           | 1059.948           |
| <b>sd6e/8g'-z4x</b>    | QX2292s         | C <sub>372</sub> H <sub>617</sub> N <sub>107</sub> O <sub>114</sub> S <sub>2</sub> | 6 | 1415.928           | 1412.937           |
|                        | QX2292s + DTT   | C <sub>372</sub> H <sub>619</sub> N <sub>107</sub> O <sub>114</sub> S <sub>2</sub> | 8 | 1060.200           | 1060.074           |
| <b>27e-z4</b>          | ZJ10311         | C <sub>185</sub> H <sub>295</sub> N <sub>51</sub> O <sub>68</sub> S                | 4 | 1088.781           | 1088.781           |
| <b>22g'-x</b>          | ZJ10312         | C <sub>187</sub> H <sub>324</sub> N <sub>56</sub> O <sub>46</sub> S                | 4 | 1031.620           | 1031.613           |
| <b>d27e/22g'-z4x</b>   | QX2294          | C <sub>372</sub> H <sub>617</sub> N <sub>107</sub> O <sub>114</sub> S <sub>2</sub> | 8 | 1059.948           | 1059.953           |
| <b>sd27e/22g'-z4x</b>  | QX2294s         | C <sub>372</sub> H <sub>617</sub> N <sub>107</sub> O <sub>114</sub> S <sub>2</sub> | 8 | 1059.948           | 1059.953           |
|                        | QX2294s + DTT   | C <sub>372</sub> H <sub>619</sub> N <sub>107</sub> O <sub>114</sub> S <sub>2</sub> | 8 | 1060.200           | 1060.197           |
| <b>6e-z4</b>           | QX31101         | C <sub>185</sub> H <sub>295</sub> N <sub>51</sub> O <sub>68</sub> S                | 4 | 1088.781           | 1088.789           |
| <b>1g'-x</b>           | QX31102         | C <sub>187</sub> H <sub>324</sub> N <sub>56</sub> O <sub>46</sub> S                | 4 | 1031.620           | 1031.629           |
| <b>d6e/1g'-z4x</b>     | QX31172         | C <sub>372</sub> H <sub>617</sub> N <sub>107</sub> O <sub>114</sub> S <sub>2</sub> | 8 | 1059.948           | 1060.088           |
| <b>sd6e/1g'-z4x</b>    | QX31172s        | C <sub>372</sub> H <sub>617</sub> N <sub>107</sub> O <sub>114</sub> S <sub>2</sub> | 7 | 1211.225           | 1211.388           |
|                        | + DTT           | C <sub>372</sub> H <sub>619</sub> N <sub>107</sub> O <sub>114</sub> S <sub>2</sub> | 7 | 1211.513           | 1211.291           |
| <b>27e-z2</b>          | DA10813         | C <sub>183</sub> H <sub>290</sub> N <sub>48</sub> O <sub>67</sub> S                | 4 | 1066.768           | 1066.763           |
| <b>29g'-x</b>          | DA10796         | C <sub>187</sub> H <sub>324</sub> N <sub>56</sub> O <sub>46</sub> S                | 4 | 1031.620           | 1031.622           |
| <b>d27e/29g'-z2x</b>   | QX2289          | C <sub>368</sub> H <sub>609</sub> N <sub>107</sub> O <sub>112</sub> S <sub>2</sub> | 8 | 1048.942           | 1048.940           |
| <b>sd27e/29g'-z2x</b>  | QX2289s         | C <sub>368</sub> H <sub>609</sub> N <sub>107</sub> O <sub>112</sub> S <sub>2</sub> | 8 | 1048.942           | 1048.942           |
|                        | QX2289s + DTT   | C <sub>368</sub> H <sub>611</sub> N <sub>107</sub> O <sub>112</sub> S <sub>2</sub> | 8 | 1049.194           | 1049.326           |
| <b>27e-z2</b>          | ZJ10313         | C <sub>181</sub> H <sub>286</sub> N <sub>51</sub> O <sub>66</sub> S                | 4 | 1066.768           | 1066.769           |
| <b>22g'-x</b>          | ZJ10312         | C <sub>187</sub> H <sub>324</sub> N <sub>56</sub> O <sub>46</sub> S                | 4 | 1031.620           | 1031.613           |
| <b>d27e/22g'-z2x</b>   | QX2293          | C <sub>368</sub> H <sub>609</sub> N <sub>107</sub> O <sub>112</sub> S <sub>2</sub> | 8 | 1048.942           | 1048.948           |
| <b>sd27e/22g'-z2x</b>  | QX2293s         | C <sub>368</sub> H <sub>609</sub> N <sub>107</sub> O <sub>112</sub> S <sub>2</sub> | 8 | 1048.942           | 1048.948           |
|                        | QX2293s + DTT   | C <sub>368</sub> H <sub>611</sub> N <sub>107</sub> O <sub>112</sub> S <sub>2</sub> | 8 | 1049.194           | 1049.067           |
| <b>24b-z4</b>          | DA10811         | C <sub>187</sub> H <sub>297</sub> N <sub>51</sub> O <sub>70</sub> S                | 4 | 1103.282           | 1103.268           |
| <b>25c'-x</b>          | DA10792         | C <sub>187</sub> H <sub>324</sub> N <sub>54</sub> O <sub>46</sub> S                | 4 | 1024.618           | 1024.605           |
| <b>d24b/25c'-z4x</b>   | QX2291          | C <sub>374</sub> H <sub>619</sub> N <sub>105</sub> O <sub>116</sub> S <sub>2</sub> | 8 | 1063.698           | 1063.705           |
| <b>sd24b/25c'-z4x</b>  | QX2291s         | C <sub>374</sub> H <sub>619</sub> N <sub>105</sub> O <sub>116</sub> S <sub>2</sub> | 8 | 1063.698           | 1063.697           |
|                        | QX2291s + DTT   | C <sub>374</sub> H <sub>621</sub> N <sub>105</sub> O <sub>116</sub> S <sub>2</sub> | 8 | 1063.950           | 1063.950           |
| <b>24b-z4</b>          | ND1095          | C <sub>187</sub> H <sub>297</sub> N <sub>51</sub> O <sub>70</sub> S                | 4 | 1103.282           | 1103.268           |
| <b>25c'-y4</b>         | QX3095          | C <sub>197</sub> H <sub>343</sub> N <sub>55</sub> O <sub>51</sub> S                | 4 | 1082.900           | 1082.906           |
| <b>d24b/25c'-z4y4</b>  | QX3096          | C <sub>384</sub> H <sub>638</sub> N <sub>106</sub> O <sub>121</sub> S <sub>2</sub> | 8 | 1092.839           | 1093.064           |
| <b>sd24b/25c'-z4y4</b> | QX3096s         | C <sub>384</sub> H <sub>638</sub> N <sub>106</sub> O <sub>121</sub> S <sub>2</sub> | 8 | 1092.839           | 1093.072           |
|                        | QX3096s + DTT   | C <sub>384</sub> H <sub>640</sub> N <sub>106</sub> O <sub>121</sub> S <sub>2</sub> | 8 | 1093.091           | 1093.315           |
| <b>7f-z4</b>           | QX22951         | C <sub>187</sub> H <sub>297</sub> N <sub>51</sub> O <sub>70</sub> S                | 4 | 1103.282           | 1103.298           |
| <b>10b'-x</b>          | QX22952         | C <sub>188</sub> H <sub>329</sub> N <sub>57</sub> O <sub>44</sub> S                | 4 | 1031.383           | 1031.397           |
| <b>d7f/10b'-z4x</b>    | QX2295          | C <sub>375</sub> H <sub>624</sub> N <sub>108</sub> O <sub>114</sub> S <sub>2</sub> | 8 | 1067.081           | 1067.088           |
| <b>sd7f/10b'-z4x</b>   | QX2295s         | C <sub>375</sub> H <sub>624</sub> N <sub>108</sub> O <sub>114</sub> S <sub>2</sub> | 7 | 1219.377           | 1219.364           |
|                        | QX2295s + DTT   | C <sub>375</sub> H <sub>626</sub> N <sub>108</sub> O <sub>114</sub> S <sub>2</sub> | 7 | 1219.665           | 1219.807           |
| <b>7f-z4</b>           | QX30984         | C <sub>187</sub> H <sub>297</sub> N <sub>51</sub> O <sub>70</sub> S                | 4 | 1103.282           | 1103.298           |
| <b>10b'-y4</b>         | QX30982         | C <sub>198</sub> H <sub>348</sub> N <sub>58</sub> O <sub>49</sub> S                | 4 | 1089.664           | 1089.671           |
| <b>d7f/10b'-z4y4</b>   | QX3101          | C <sub>385</sub> H <sub>643</sub> N <sub>109</sub> O <sub>119</sub> S <sub>2</sub> | 8 | 1096.221           | 1096.447           |
| <b>sd7f/10b'-z4y4</b>  | QX3101s         | C <sub>385</sub> H <sub>643</sub> N <sub>109</sub> O <sub>119</sub> S <sub>2</sub> | 7 | 1252.680           | 1253.046           |
|                        | QX3101s + DTT   | C <sub>385</sub> H <sub>645</sub> N <sub>109</sub> O <sub>119</sub> S <sub>2</sub> | 8 | 1096.473           | 1096.697           |
| <b>27e-x</b>           | QX22711         | C <sub>178</sub> H <sub>279</sub> N <sub>47</sub> O <sub>64</sub> S                | 4 | 1033.752           | 1033.757           |
| <b>29g-x</b>           | QX22712         | C <sub>187</sub> H <sub>324</sub> N <sub>56</sub> O <sub>46</sub> S                | 4 | 1031.620           | 1031.624           |

|                                |              |                                                                                    |   |          |          |
|--------------------------------|--------------|------------------------------------------------------------------------------------|---|----------|----------|
| <b>d27e/29g'-xx</b>            | QX2271       | C <sub>365</sub> H <sub>601</sub> N <sub>103</sub> O <sub>110</sub> S <sub>2</sub> | 8 | 1032.434 | 1032.442 |
| <b>sd27e/29g'-x4x</b>          | QX2283       | C <sub>373</sub> H <sub>617</sub> N <sub>109</sub> O <sub>113</sub> S <sub>2</sub> | 8 | 1062.950 | 1062.953 |
|                                | QX2283 + DTT | C <sub>373</sub> H <sub>619</sub> N <sub>109</sub> O <sub>113</sub> S <sub>2</sub> | 8 | 1063.202 | 1063.33  |
| <b>sd27e/29g'-x4px</b>         | QX3079       | C <sub>383</sub> H <sub>636</sub> N <sub>110</sub> O <sub>118</sub> S <sub>2</sub> | 8 | 1092.090 | 1092.075 |
|                                | QX3079 + DTT | C <sub>383</sub> H <sub>638</sub> N <sub>110</sub> O <sub>118</sub> S <sub>2</sub> | 8 | 1092.342 | 1092.447 |
| <b>(R)-27e-x</b>               | ZJ10551      | C <sub>178</sub> H <sub>279</sub> N <sub>47</sub> O <sub>64</sub> S                | 4 | 1033.752 | 1033.751 |
| <b>(R,S)-d27e/29g'-xx</b>      | QX3118       | C <sub>365</sub> H <sub>601</sub> N <sub>103</sub> O <sub>110</sub> S <sub>2</sub> | 8 | 1032.434 | 1032.541 |
| <b>(R,S)-sd27e/29g'-x4x</b>    | ZJ1056       | C <sub>373</sub> H <sub>617</sub> N <sub>109</sub> O <sub>113</sub> S <sub>2</sub> | 8 | 1062.950 | 1063.073 |
|                                | ZJ1056 + DTT | C <sub>373</sub> H <sub>619</sub> N <sub>109</sub> O <sub>113</sub> S <sub>2</sub> | 8 | 1063.202 | 1063.264 |
| <b>affibody a</b>              | CD1054       | C <sub>296</sub> H <sub>471</sub> N <sub>87</sub> O <sub>89</sub> S                | 5 | 1341.103 | 1341.106 |
| <b>a8/42-xx</b>                | QX3102       | C <sub>298</sub> H <sub>469</sub> N <sub>87</sub> O <sub>87</sub> S                | 5 | 1339.102 | 1339.123 |
| <b>sa8/42-x4x</b>              | QX3106       | C <sub>306</sub> H <sub>485</sub> N <sub>93</sub> O <sub>90</sub> S                | 5 | 1387.927 | 1387.915 |
| <b>Fluorescent affibody fa</b> | ZJ10611      | C <sub>317</sub> H <sub>480</sub> N <sub>86</sub> O <sub>95</sub> S                | 5 | 1412.914 | 1412.883 |
| <b>fa8/42-xx</b>               | ZJ01612      | C <sub>319</sub> H <sub>478</sub> N <sub>86</sub> O <sub>93</sub> S                | 5 | 1410.913 | 1410.888 |
| <b>fsa8/42-x4x</b>             | ZJ1062       | C <sub>327</sub> H <sub>494</sub> N <sub>92</sub> O <sub>96</sub> S                | 5 | 1459.738 | 1459.705 |

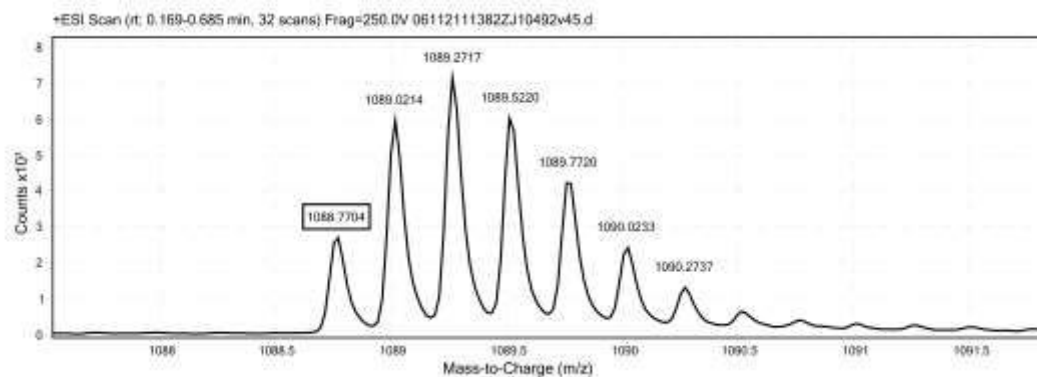

**Figure S16.** ESI-TOF spectrum for acidic monomer **20e-z4** (ZJ10492, C<sub>185</sub>H<sub>295</sub>N<sub>51</sub>O<sub>68</sub>S). Expected [M+4H<sup>+</sup>]/4 = 1088.781 Da. Observed [M+4H<sup>+</sup>]/4 = 1088.770 Da.

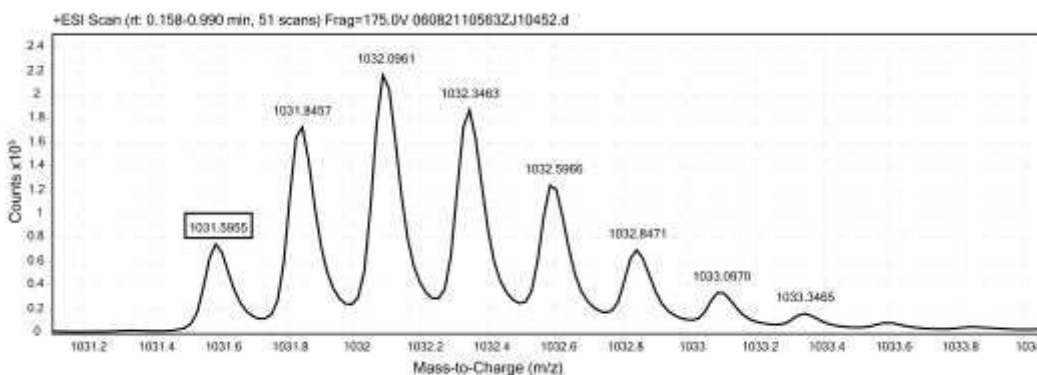

**Figure S17.** ESI-TOF spectrum for basic monomer **22g'-x** (ZJ10452, C<sub>187</sub>H<sub>324</sub>N<sub>56</sub>O<sub>46</sub>S). Expected [M+4H<sup>+</sup>]/4 = 1031.620 Da. Observed [M+4H<sup>+</sup>]/4 = 1031.596 Da.

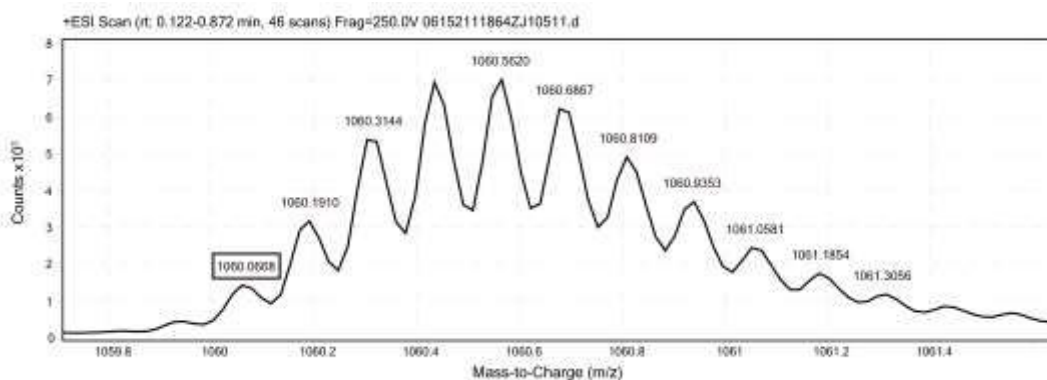

**Figure S18.** ESI-TOF spectrum for disulfide-bound coiled-coil variant **d20e/22g'-z4x** (ZJ10511, C<sub>372</sub>H<sub>617</sub>N<sub>107</sub>O<sub>114</sub>S<sub>2</sub>). Expected [M+8H<sup>+</sup>]/8 = 1059.948 Da. Observed [M+8H<sup>+</sup>]/4 = 1060.067 Da.

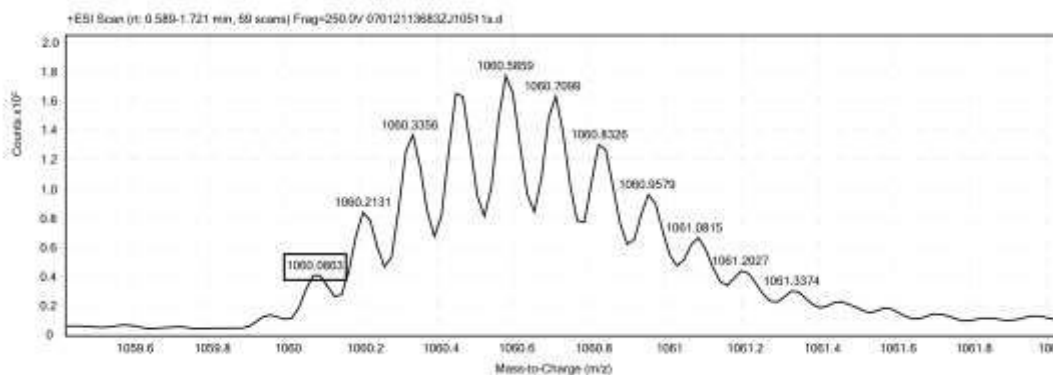

**Figure S19.** ESI-TOF spectrum for disulfide-bound stapled coiled-coil variant **sd20e/22g'-z4x** (ZJ10511s, C<sub>372</sub>H<sub>617</sub>N<sub>107</sub>O<sub>114</sub>S<sub>2</sub>). Expected [M+8H<sup>+</sup>]/8 = 1059.948 Da. Observed [M+8H<sup>+</sup>]/4 = 1060.086 Da.

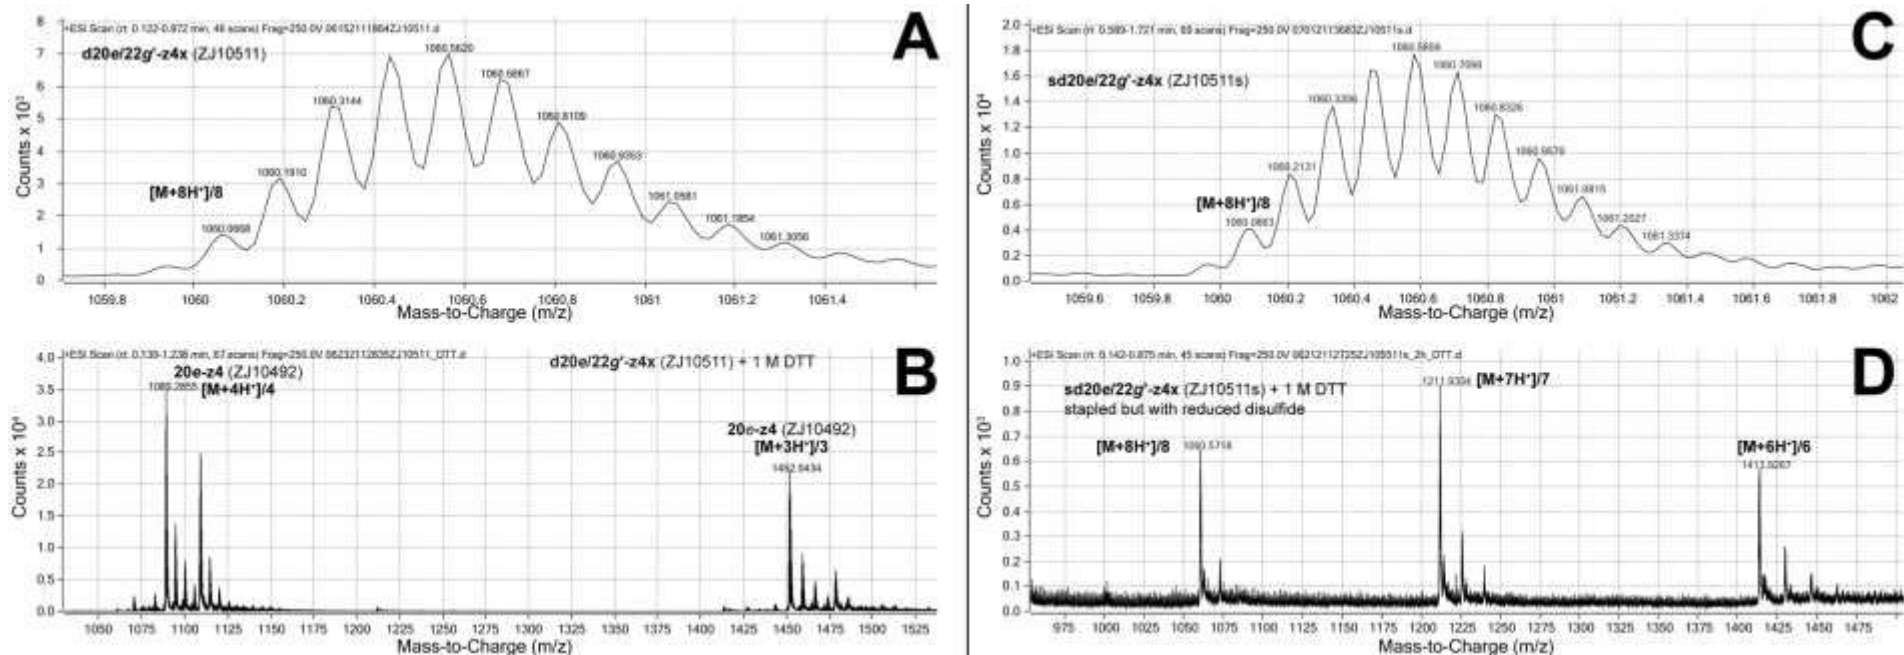

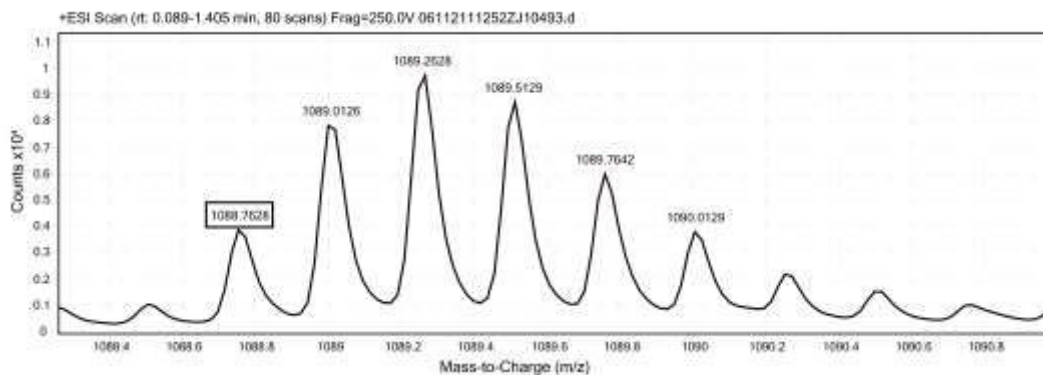

**Figure S21.** ESI-TOF spectrum for acidic monomer **13e-z4** (ZJ10493, C<sub>185</sub>H<sub>295</sub>N<sub>51</sub>O<sub>68</sub>S). Expected [M+4H<sup>+</sup>]/4 = 1088.781 Da. Observed [M+4H<sup>+</sup>]/4 = 1088.763 Da.

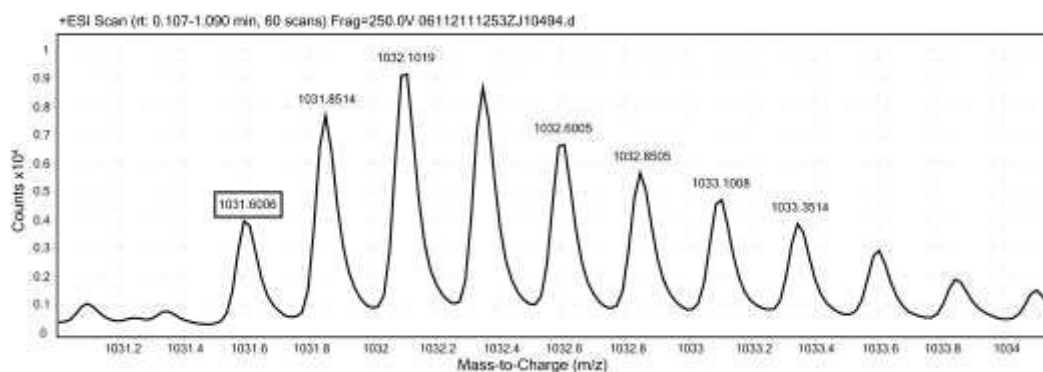

**Figure S22.** ESI-TOF spectrum for basic monomer **15g'-x** (ZJ10494, C<sub>187</sub>H<sub>324</sub>N<sub>56</sub>O<sub>46</sub>S). Expected [M+4H<sup>+</sup>]/4 = 1031.620 Da. Observed [M+4H<sup>+</sup>]/4 = 1031.601 Da.

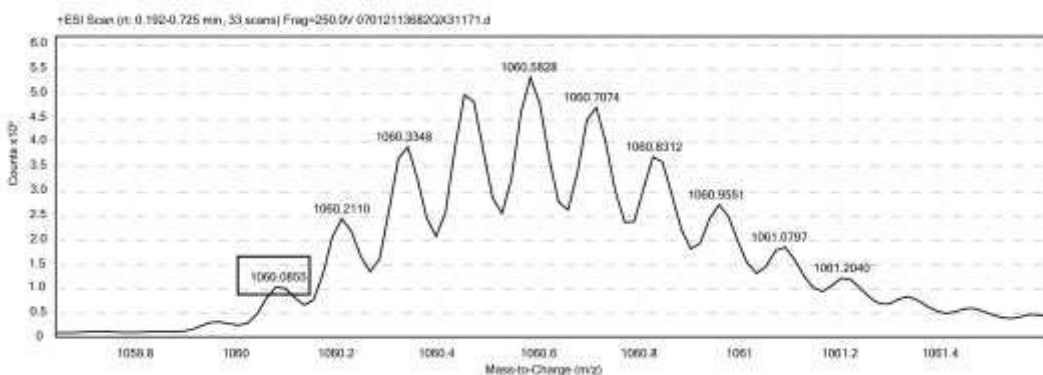

**Figure S23.** ESI-TOF spectrum for disulfide-bound coiled-coil variant **d13e/15g'-z4x** (QX31171, C<sub>372</sub>H<sub>617</sub>N<sub>107</sub>O<sub>114</sub>S<sub>2</sub>). Expected [M+8H<sup>+</sup>]/8 = 1059.948 Da. Observed [M+4H<sup>+</sup>]/4 = 1060.086 Da.

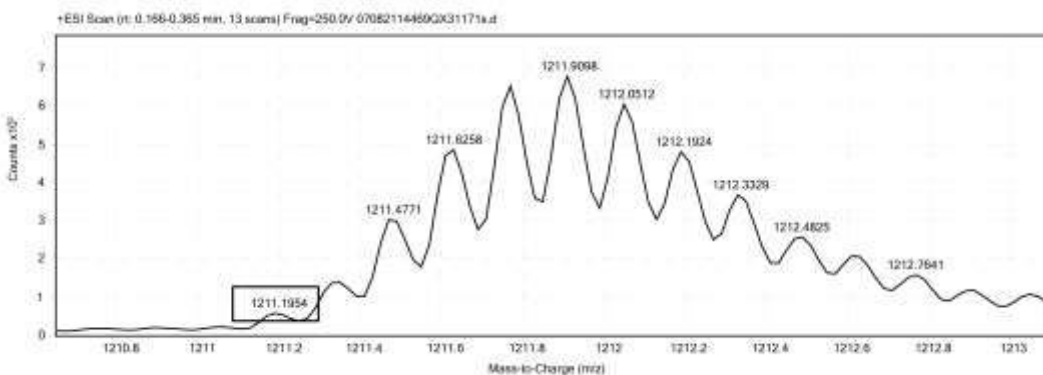

**Figure S24.** ESI-TOF spectrum for stapled disulfide-bound coiled-coil variant **sd13e/15g'-z4x** (QX31171s, C<sub>372</sub>H<sub>617</sub>N<sub>107</sub>O<sub>114</sub>S<sub>2</sub>). Expected [M+7H<sup>+</sup>]/7 = 1211.225 Da. Observed [M+7H<sup>+</sup>]/7 = 1211.195 Da.



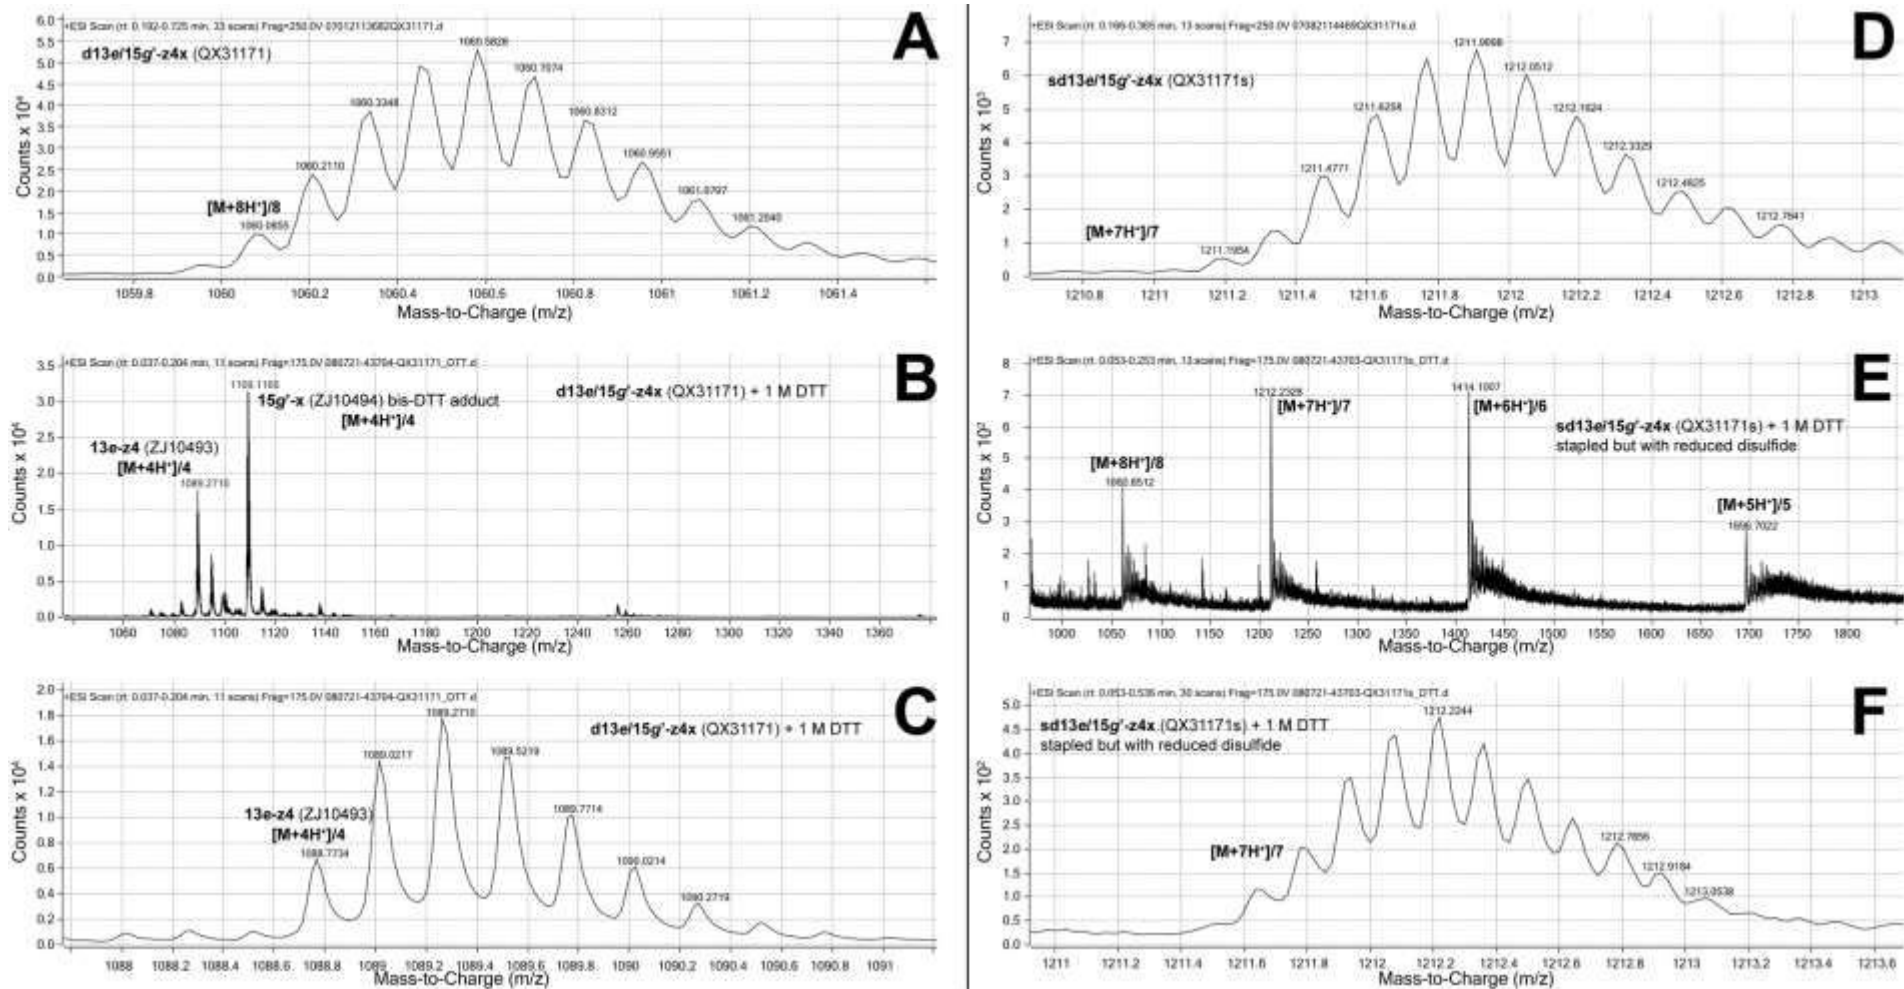

**Figure S25.** ESI-TOF MS data for azide-containing (A) disulfide-bound coiled-coil variant **d13e/15g'-z4x** before (QX31171; C<sub>372</sub>H<sub>617</sub>N<sub>107</sub>O<sub>114</sub>S<sub>2</sub>; expected [M+8H<sup>+</sup>]/8 = 1059.948 Da) and (B) after exposure to reducing conditions (1M DTT) for at least 8h. Following reduction, **d13e/15g'-z4x** splits into its component peptides: **13e-z4** (ZJ10493; C<sub>185</sub>H<sub>295</sub>N<sub>51</sub>O<sub>68</sub>S; expected mass [M+4H<sup>+</sup>]/4 = 1088.781 Da) and **15g'-x** (ZJ10494; C<sub>187</sub>H<sub>324</sub>N<sub>56</sub>O<sub>46</sub>S; expected mass [M+4H<sup>+</sup>]/4 = 1031.620 Da). **15g'-x** does not appear in spectrum for reasons that are not clear. Instead, we observe a peak with m/z = 1109.117 Da and isotopic spacing consistent with z = 4. This peak is consistent with bis-DTT adduct of **15g'-x** (C<sub>195</sub>H<sub>344</sub>N<sub>56</sub>O<sub>50</sub>S<sub>5</sub>; expected [M+4H<sup>+</sup>]/4 = 1108.626), which could be formed via tandem thiol-yne and thiol-ene reactions between the propargylglycine of **15g'-x** and two equivalents of DTT. Also shown are ESI-TOF MS data for (C) triazole-stapled coiled-coil variant **sd13e/15g'-z4x** before (QX31171s; C<sub>372</sub>H<sub>617</sub>N<sub>107</sub>O<sub>114</sub>S<sub>2</sub>; expected [M+7H<sup>+</sup>]/7 = 1211.225 Da) and (E) after exposure to reduction conditions for at least 8h (C<sub>372</sub>H<sub>619</sub>N<sub>107</sub>O<sub>114</sub>S<sub>2</sub>; expected [M+8H<sup>+</sup>]/8 = 1060.200 Da after reduction of disulfide bond to cysteine residues). Note that **sd13e/15g'-z4x** remains intact even after disulfide reduction due to the triazole staple.

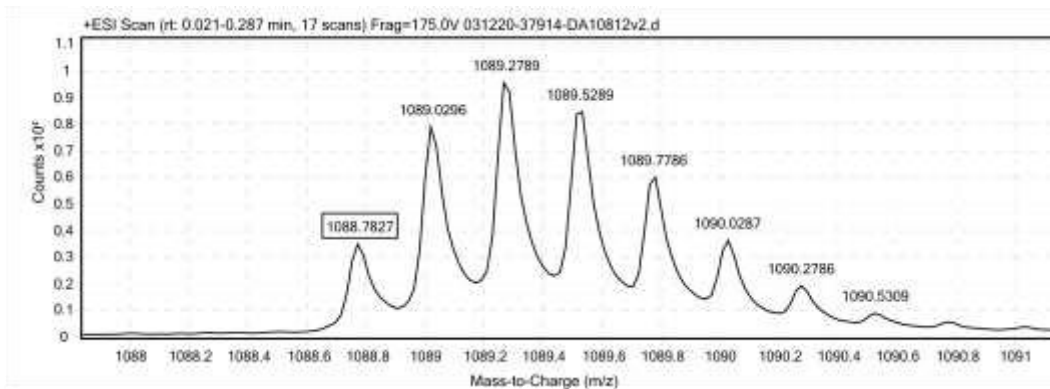

**Figure S26.** ESI-TOF spectrum for acidic monomer **6e-z4** (DA10812;  $C_{185}H_{295}N_{51}O_{68}S$ ; expected  $[M+4H^+]/4 = 1088.781$  Da. Observed  $[M+4H^+]/4 = 1088.783$  Da.

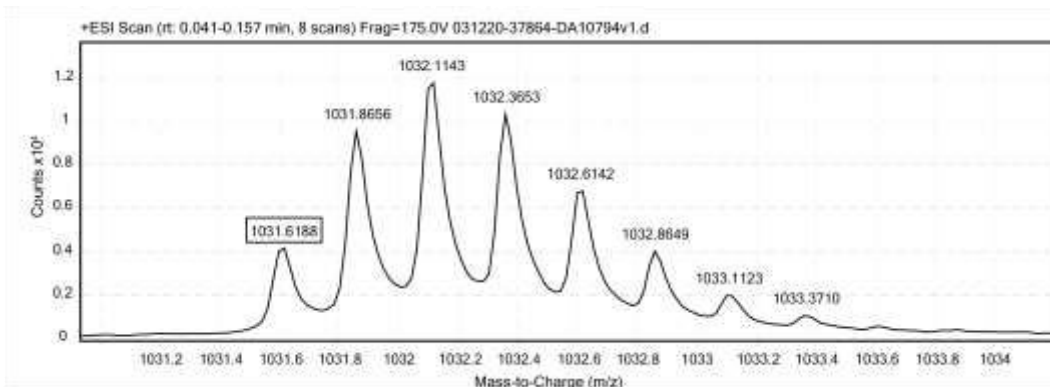

**Figure S27.** ESI-TOF spectrum for basic variant **8g'-x** (DA10794;  $C_{187}H_{324}N_{56}O_{46}S$ ). Expected  $[M+4H^+]/4 = 1031.620$  Da. Observed  $[M+4H^+]/4 = 1031.619$  Da.

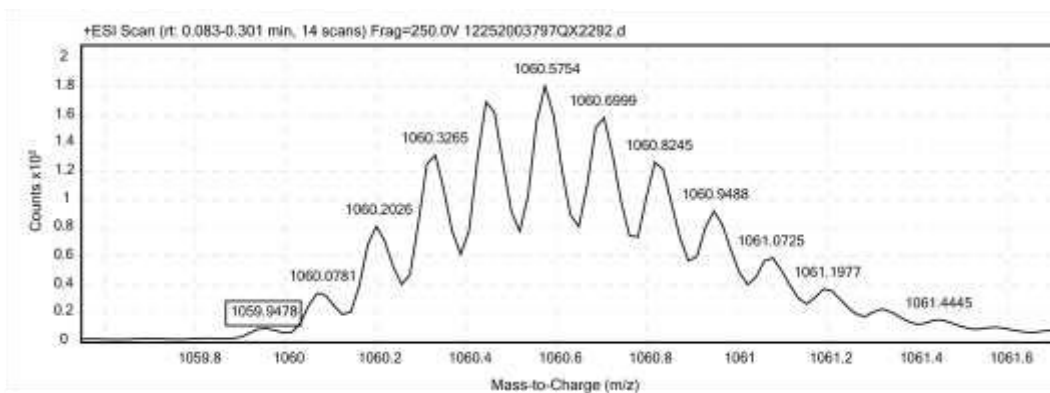

**Figure S28.** ESI-TOF spectrum for disulfide-bound coiled-coil variant **d6e/8g'-z4x** (QX2292;  $C_{372}H_{617}N_{107}O_{114}S_2$ ). Expected  $[M+8H^+]/8 = 1059.948$  Da. Observed  $[M+8H^+]/8 = 1059.948$  Da.

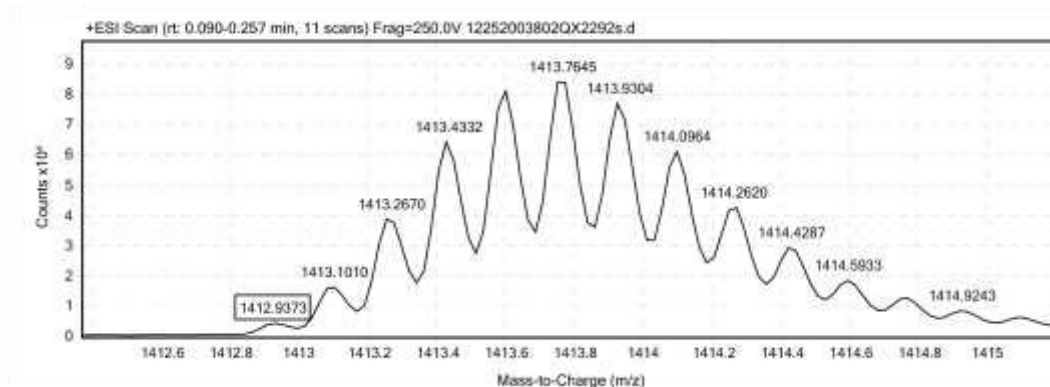

**Figure S29.** ESI-TOF spectrum for stapled disulfide-bound coiled-coil variant **sd6e/8g'-z4x** (QX2292s;  $C_{372}H_{617}N_{107}O_{114}S_2$ ). Expected  $[M+6H^+]/6 = 1412.928$  Da. Observed  $[M+6H^+]/6 = 1412.937$  Da.

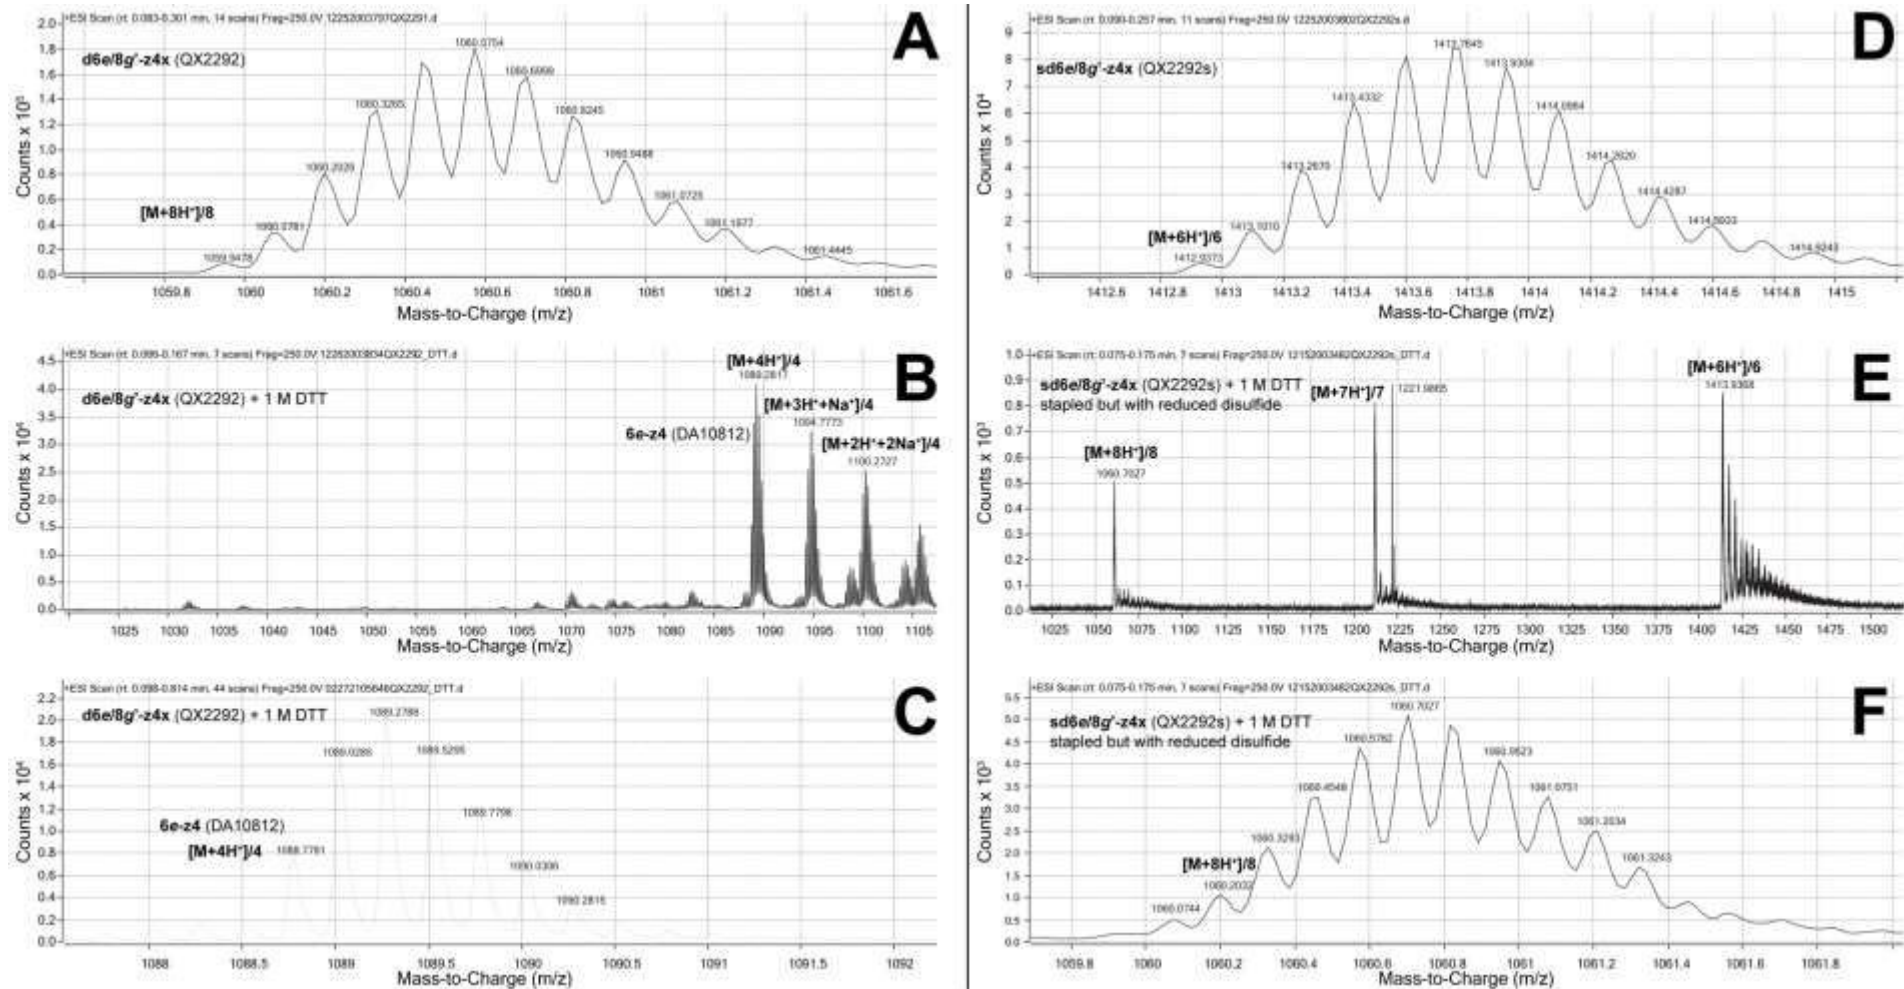

**Figure S30.** ESI-TOF MS data for (A) disulfide-bound coiled-coil variant **d6e/8g'-z4x** before (QX2292; C<sub>372</sub>H<sub>617</sub>N<sub>107</sub>O<sub>114</sub>S<sub>2</sub>; expected  $[M+8H^+]/8 = 1059.948$  Da) and (B,C) after exposure to reducing conditions (1M DTT) for at least 8h. Following reduction, **d6e/8g'-z4x** should split into its component peptides: **6e-z4** (DA10812; C<sub>185</sub>H<sub>324</sub>N<sub>56</sub>O<sub>68</sub>S; expected mass  $[M+4H^+]/4 = 1088.781$ ) and **8g'-x** (DA10794; C<sub>187</sub>H<sub>324</sub>N<sub>56</sub>O<sub>46</sub>S; expected mass  $[M+4H^+]/4 = 1031.620$  Da). Peptide **8g'-x** does not appear in (B,C) for reasons that are unclear. Also shown are ESI-TOF MS data for (D) triazole-stapled **sd6e/8g'-z4x** before (QX2292s; C<sub>372</sub>H<sub>617</sub>N<sub>107</sub>O<sub>114</sub>S<sub>2</sub>; expected  $[M+6H^+]/6 = 1412.928$  Da) and (E,F) after exposure to reducing conditions (1M DTT) for at least 8h (C<sub>372</sub>H<sub>619</sub>N<sub>107</sub>O<sub>114</sub>S<sub>2</sub>; expected  $[M+8H^+]/8 = 1060.200$  Da after reduction of disulfide bond to free cysteine residues). Note that **sd6e/8g'-z4x** remains intact even after disulfide reduction due to the triazole staple.

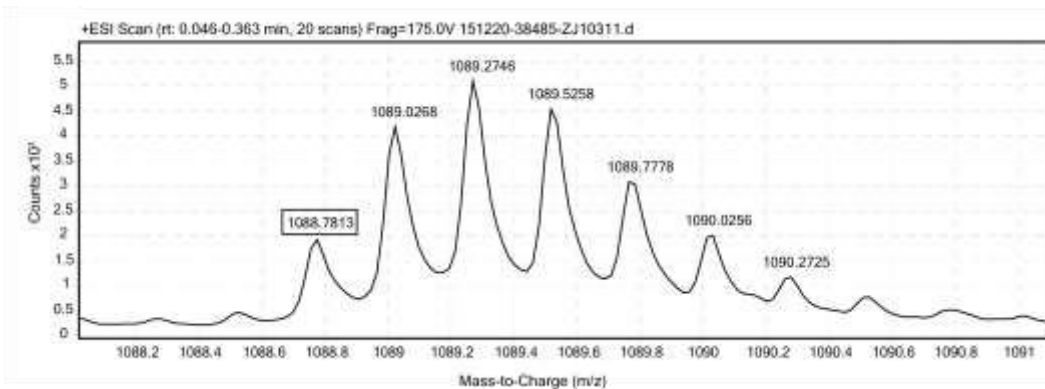

**Figure S31.** ESI-TOF spectrum for acidic monomer **27e-z4** (ZJ10311, C<sub>185</sub>H<sub>295</sub>N<sub>51</sub>O<sub>68</sub>S). Expected [M+4H<sup>+</sup>]/4 = 1088.781 Da. Observed [M+4H<sup>+</sup>]/4 = 1088.781 Da.

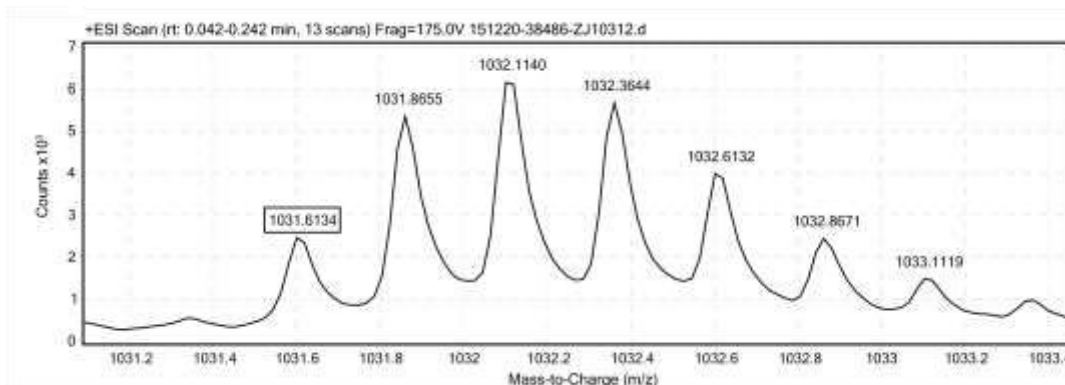

**Figure S32.** ESI-TOF spectrum for basic monomer **22g'-x** (ZJ10312, C<sub>187</sub>H<sub>324</sub>N<sub>56</sub>O<sub>46</sub>S). Expected [M+4H<sup>+</sup>]/4 = 1031.620 Da. Observed [M+4H<sup>+</sup>]/4 = 1031.613 Da.

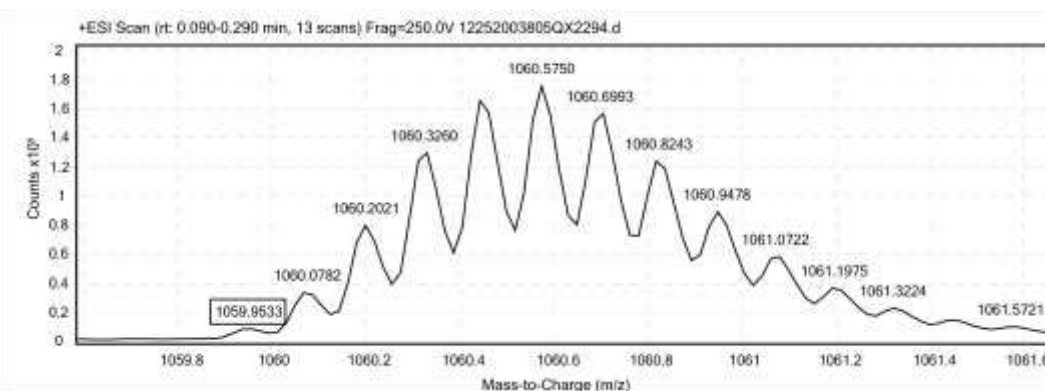

**Figure S33.** ESI-TOF spectrum for disulfide-bound coiled-coil variant **d27e/22g'-z4x** (QX2294, C<sub>372</sub>H<sub>617</sub>N<sub>107</sub>O<sub>114</sub>S<sub>2</sub>). Expected [M+8H<sup>+</sup>]/8 = 1059.948 Da. Observed [M+8H<sup>+</sup>]/8 = 1059.953 Da.

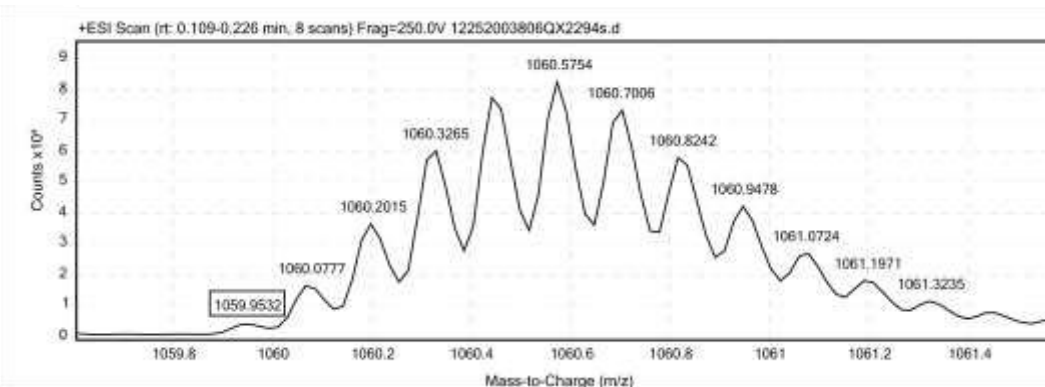

**Figure S34.** ESI-TOF spectrum for stapled disulfide-bound coiled-coil variant **sd27e/22g'-40** (QX2294s, C<sub>372</sub>H<sub>617</sub>N<sub>107</sub>O<sub>114</sub>S<sub>2</sub>). Expected [M+8H<sup>+</sup>]/8 = 1059.948 Da. Observed [M+8H<sup>+</sup>]/8 = 1059.953 Da

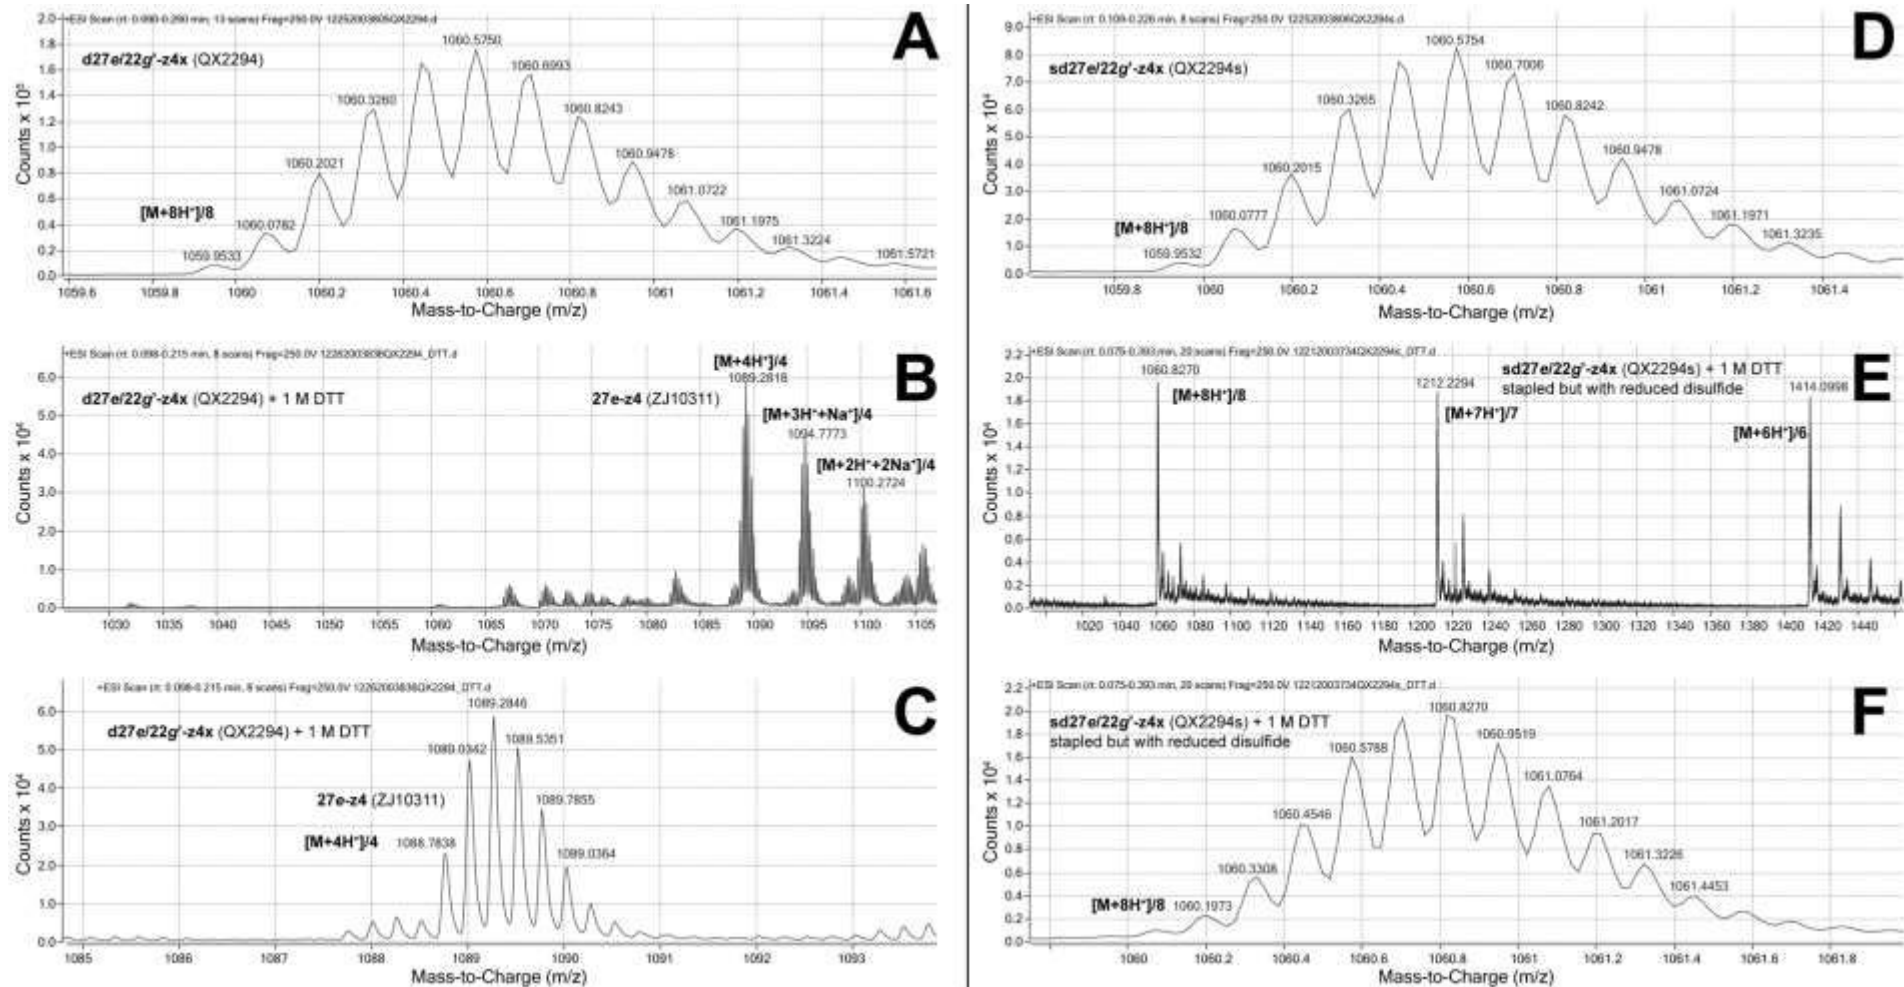

**Figure S35.** ESI-TOF MS data for azide-containing (A) disulfide-bound coiled-coil variant **d27e/22g'-z4x** before (QX2294;  $C_{372}H_{617}N_{107}O_{114}S_2$ ; expected  $[M+8H^+]/8 = 1059.948$  Da) and (B,C) after exposure to reducing conditions (1M DTT) for at least 8h. Following reduction, **d27e/22g'-z4x** splits into its component peptides: **27e-z4** (ZJ10311;  $C_{187}H_{324}N_{56}O_{46}S$ ; expected mass  $[M+4H^+]/4 = 1088.781$  Da) and **22g'-x** (ZJ10312;  $C_{187}H_{324}N_{56}O_{46}S$ ; expected mass  $[M+4H^+]/4 = 1031.620$  Da; does not appear in spectrum for reasons that are not clear). Also shown are ESI-TOF MS data for (D) triazole-stapled disulfide-bound coiled-coil variant **sd27e/22g'-z4x** before (QX2294s;  $C_{372}H_{617}N_{107}O_{114}S_2$ ; expected  $[M+8H^+]/8 = 1059.948$  Da) and (E,F) after exposure to reduction conditions for at least 8h ( $C_{372}H_{619}N_{107}O_{114}S_2$ ; expected  $[M+8H^+]/8 = 1060.073$  Da after reduction of disulfide bond to cysteine residues). Note that **sd27e/22g'-z4x** remains intact even after disulfide reduction due to the triazole staple.

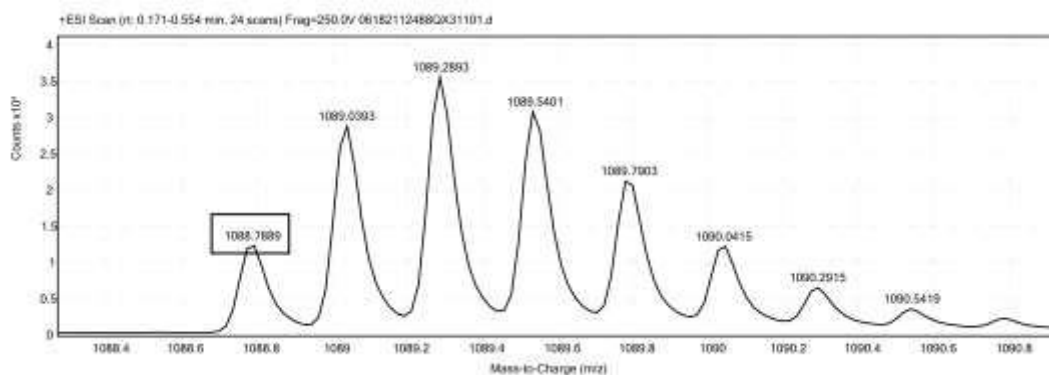

**Figure S36.** ESI-TOF spectrum for acidic monomer **6e-z4** (QX31101,  $C_{185}H_{295}N_{51}O_{68}S$ ). Expected  $[M+4H^+]/4 = 1088.781$  Da. Observed  $[M+4H^+]/4 = 1088.789$  Da.

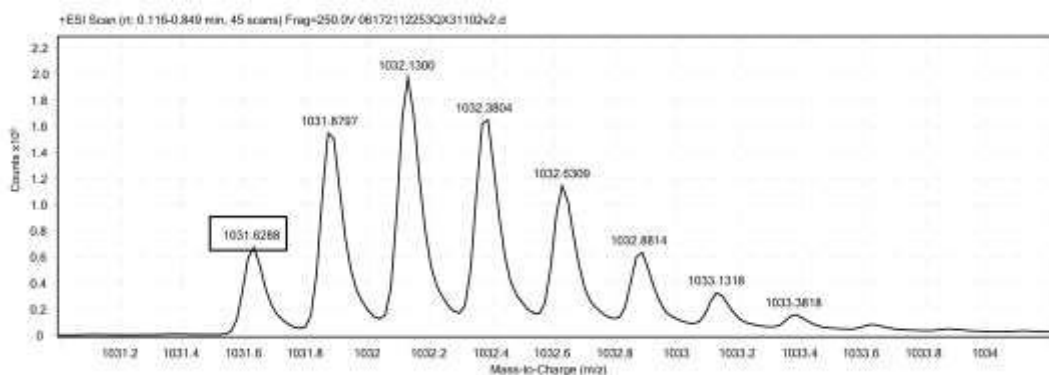

**Figure S37.** ESI-TOF spectrum for basic monomer **1g'-x** (QX31102,  $C_{187}H_{324}N_{56}O_{46}S$ ). Expected  $[M+4H^+]/4 = 1031.620$  Da. Observed  $[M+4H^+]/4 = 1031.629$  Da.

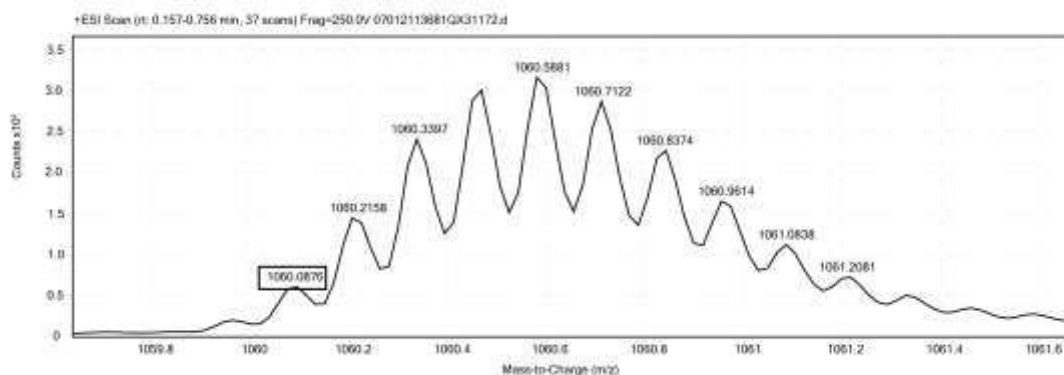

**Figure S38.** ESI-TOF spectrum for disulfide-bound coiled-coil variant **d6e/1g'-z4x** (QX31172,  $C_{372}H_{617}N_{107}O_{114}S_2$ ). Expected  $[M+8H^+]/8 = 1059.948$  Da. Observed  $[M+4H^+]/4 = 1060.088$  Da.

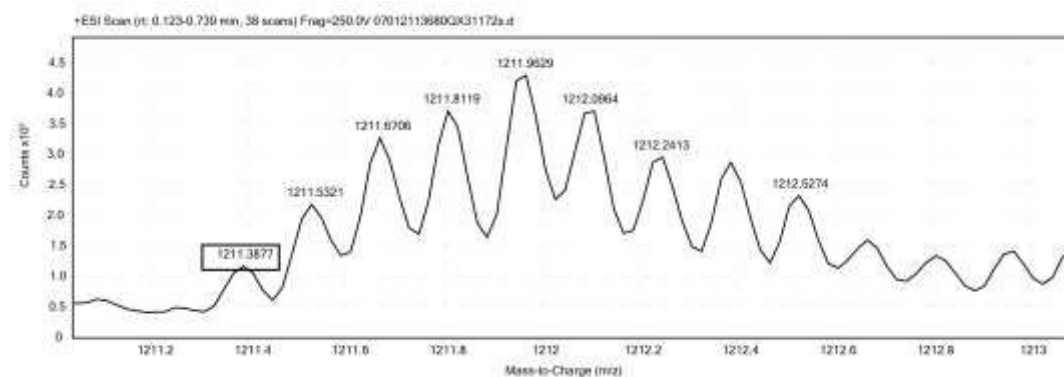

**Figure S39.** ESI-TOF spectrum for stapled disulfide-bound coiled-coil variant **sd6e/1g'-z4x** (QX31172s,  $C_{372}H_{617}N_{107}O_{114}S_2$ ). Expected  $[M+7H^+]/7 = 1211.225$  Da. Observed  $[M+7H^+]/7 = 1211.388$  Da.

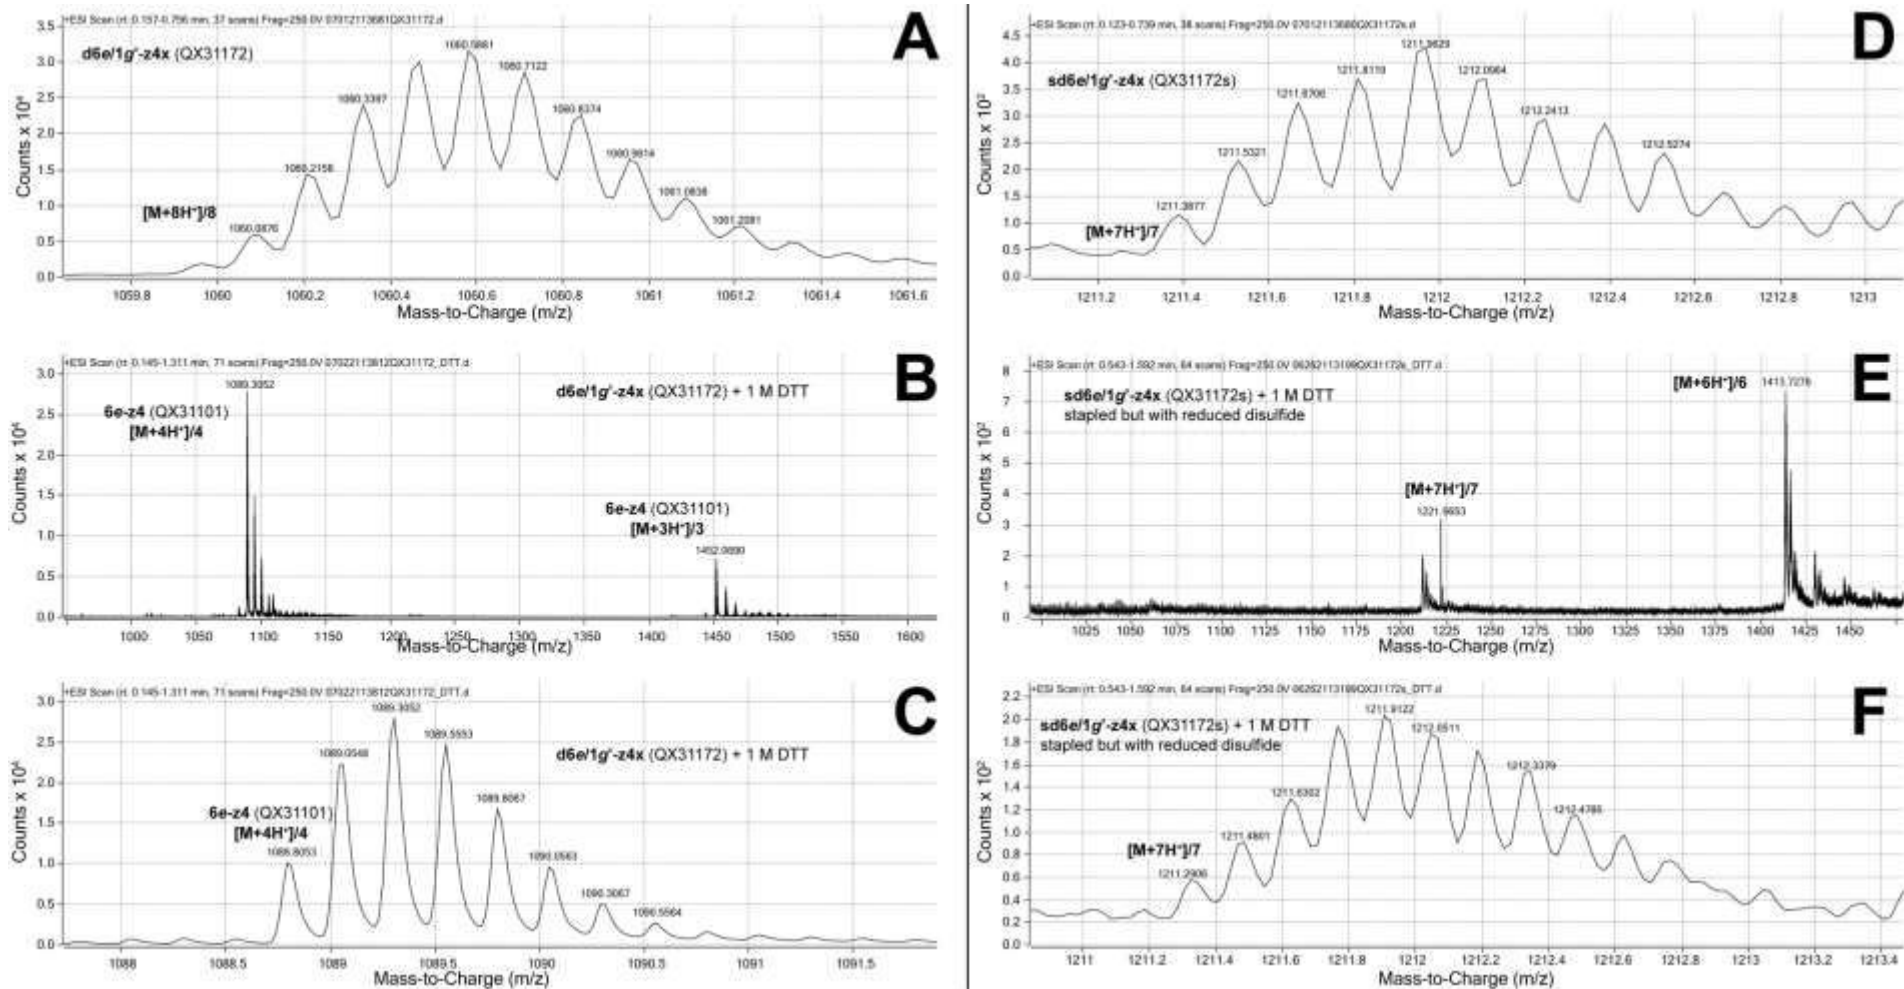

**Figure S40.** ESI-TOF MS data for azide-containing (A) disulfide-bound coiled-coil variant **d6e/1g'-z4x** before (QX31172;  $C_{372}H_{617}N_{107}O_{114}S_2$ ; expected  $[M+8H^+]_8 = 1059.948$  Da) and (B,C) after exposure to reducing conditions (1M DTT) for at least 8h. Following reduction, **d6e/1g'-z4x** splits into its component peptides: **6e-z4** (QX31101;  $C_{185}H_{295}N_{51}O_{68}S$ ; expected mass  $[M+4H^+]_4 = 1088.781$  Da) and **1g'-x** (QX31102;  $C_{187}H_{324}N_{56}O_{46}S$ ; expected mass  $[M+4H^+]_4 = 1031.620$  Da; does not appear in spectrum for reasons that are not clear). Also shown are ESI-TOF MS data for (D) triazole-stapled disulfide-bound coiled-coil variant **sd6e/1g'-z4x** before (QX31172s;  $C_{372}H_{617}N_{107}O_{114}S_2$ ; expected  $[M+7H^+]_7 = 1211.225$  Da) and (E,F) after exposure to reduction conditions for at least 8h ( $C_{372}H_{619}N_{107}O_{114}S_2$ ; expected  $[M+7H^+]_7 = 1211.513$  Da after reduction of disulfide bond to cysteine residues). Note that **sd6e/1g'-z4x** remains intact even after disulfide reduction due to the triazole staple.

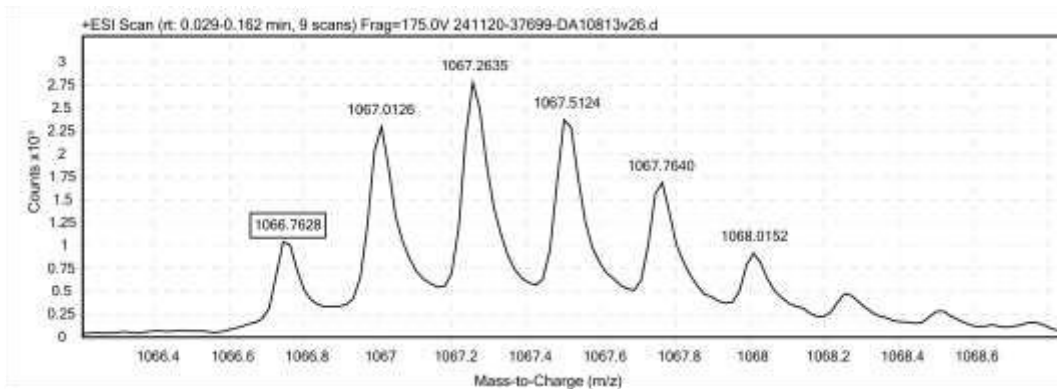

**Figure S41.** ESI-TOF spectrum for acidic monomer **27e-z2** (DA10813;  $C_{183}H_{290}N_{48}O_{67}S$ ; expected  $[M+4H^+]/4 = 1066.768$  Da). Observed  $[M+4H^+]/4 = 1066.763$  Da.

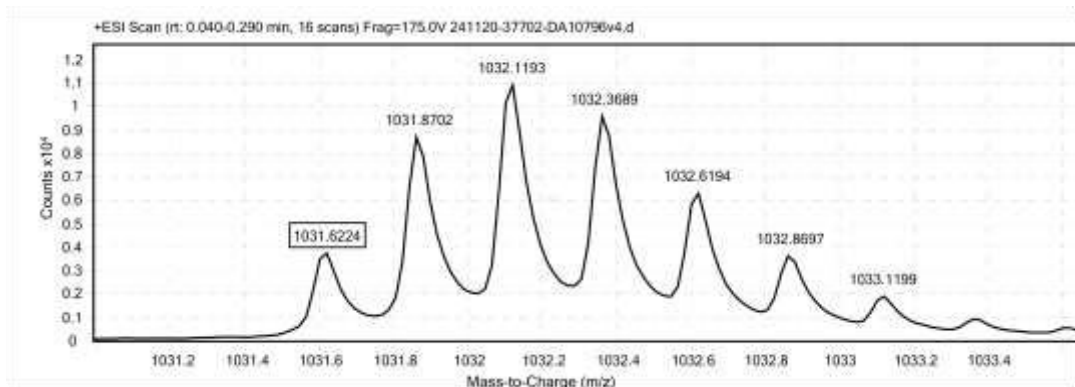

**Figure S42.** ESI-TOF spectrum for basic monomer **29g'-x** (DA10796;  $C_{187}H_{324}N_{56}O_{46}S$ ; expected  $[M+4H^+]/4 = 1031.620$  Da). Observed  $[M+4H^+]/4 = 1031.622$  Da.

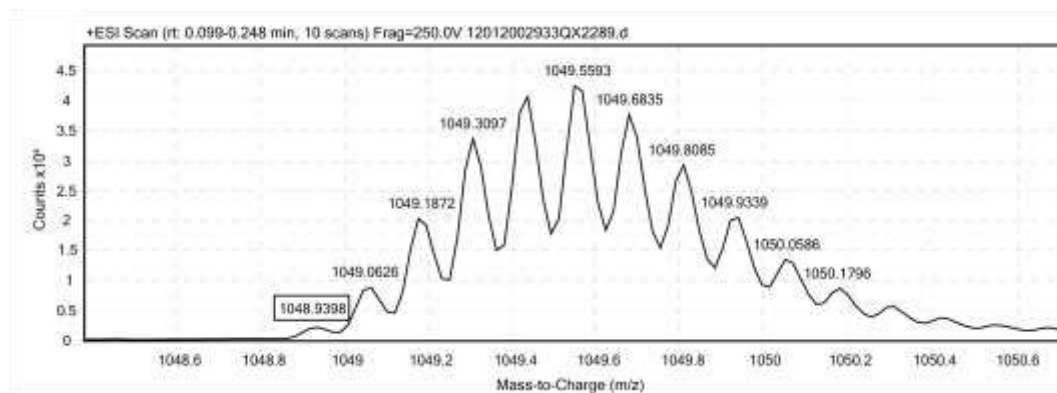

**Figure S43.** ESI-TOF spectrum for disulfide-bound coiled-coil variant **d27e/29g'-z2x** (QX2289;  $C_{368}H_{609}N_{107}O_{112}S_2$ ; expected  $[M+8H^+]/8 = 1048.942$  Da). Observed  $[M+8H^+]/8 = 1048.940$  Da.

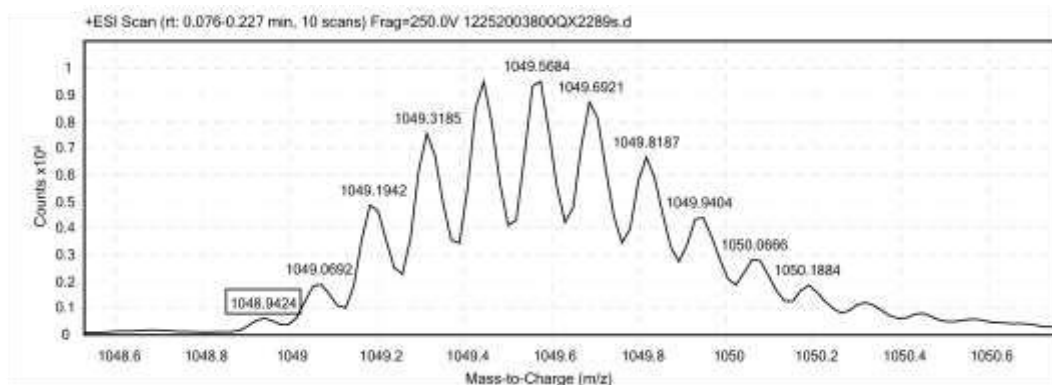

**Figure S44.** ESI-TOF spectrum for coiled-coil variant **sd27e/29g'-z2x** (QX2289s;  $C_{368}H_{609}N_{107}O_{112}S_2$ ; expected  $[M+8H^+]/8 = 1048.942$  Da). Observed  $[M+8H^+]/8 = 1048.942$  Da.



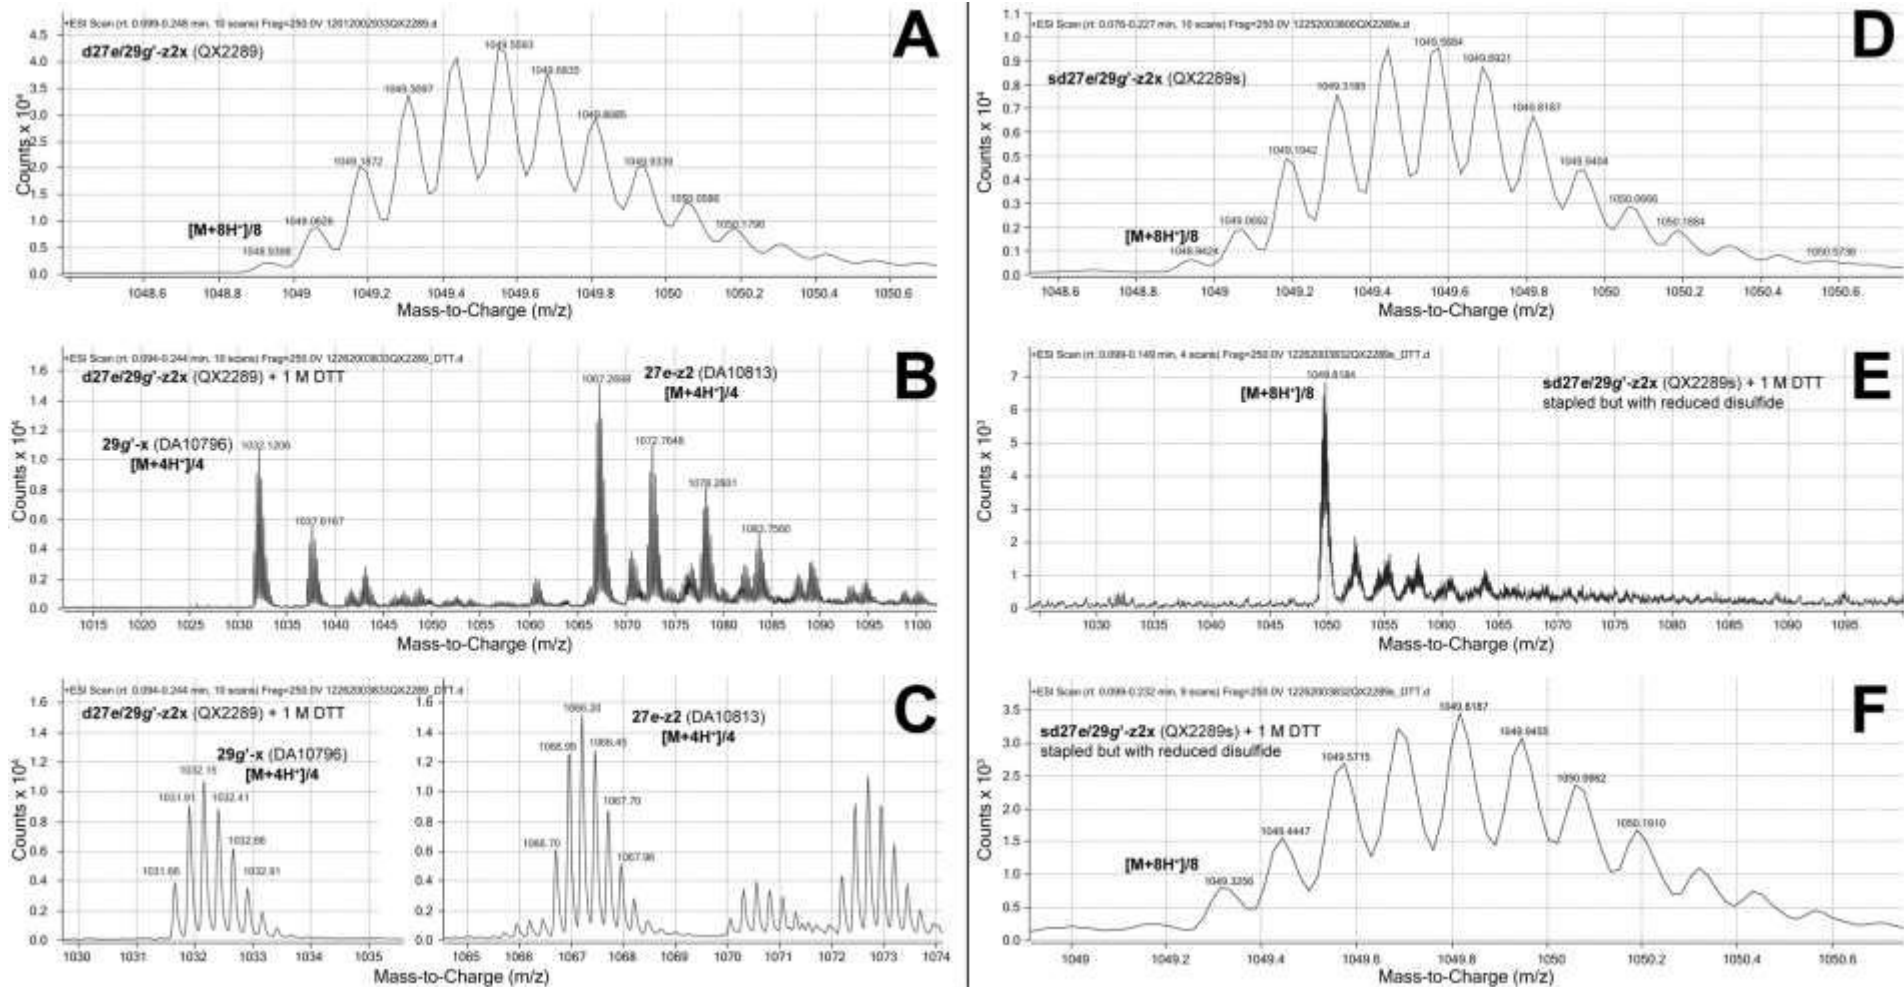

**Figure S45.** ESI-TOF MS data for (A) coiled-coil variant **d27e/29g'-z2x** before (QX2289; C<sub>368</sub>H<sub>609</sub>N<sub>107</sub>O<sub>112</sub>S<sub>2</sub>; expected [M+8H<sup>+</sup>]/8 = 1048.942 Da) and (B,C) after exposure to reducing conditions (1M DTT) for at least 8h. Following reduction, **d27e/29g'-z2x** splits into its component peptides: **27e-z2** (DA10813; C<sub>183</sub>H<sub>290</sub>N<sub>48</sub>O<sub>67</sub>S; expected mass [M+4H<sup>+</sup>]/4 = 1066.7682) and **29g'-x** (DA10796; C<sub>187</sub>H<sub>324</sub>N<sub>56</sub>O<sub>46</sub>S; expected mass [M+4H<sup>+</sup>]/4 = 1031.620 Da). Also shown are ESI-TOF MS data for (D) triazole-stapled **sd27e/29g'-z2x** before (QX2289s; C<sub>368</sub>H<sub>609</sub>N<sub>107</sub>O<sub>112</sub>S<sub>2</sub>; expected [M+8H<sup>+</sup>]/8 = 1048.942 Da) and (E,F) after exposure to reducing conditions (1M DTT) for at least 8h (C<sub>373</sub>H<sub>619</sub>N<sub>109</sub>O<sub>113</sub>S<sub>2</sub>; expected [M+8H<sup>+</sup>]/8 = 1049.194 Da after reduction of disulfide bond to free cysteine residues). Note that **sd27e/29g'-z2x** remains intact even after disulfide reduction due to the triazole staple.

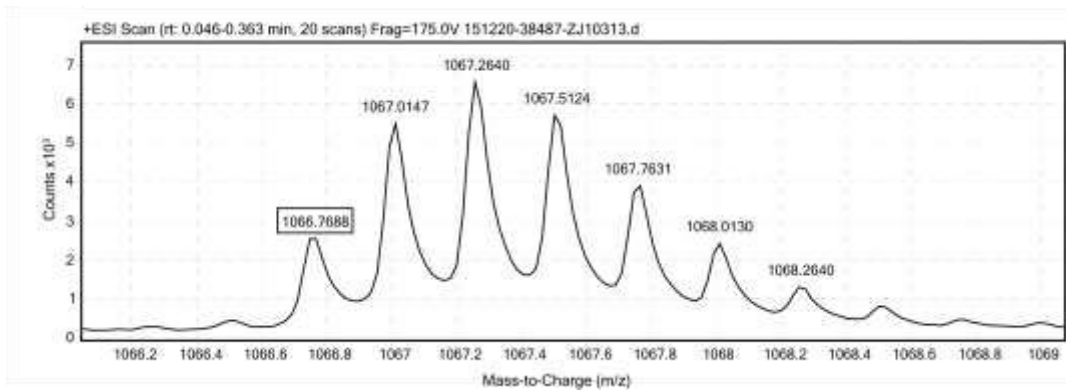

**Figure S46.** ESI-TOF spectrum for acidic monomer **27e-z2** (ZJ10313;  $C_{181}H_{286}N_{51}O_{66}S$ ; expected  $[M+4H^+]/4 = 1066.768$  Da). Observed  $[M+4H^+]/4 = 1066.769$  Da.

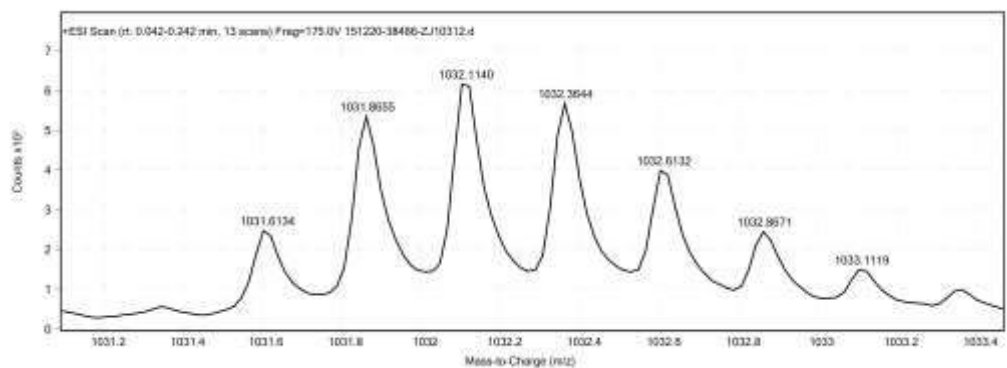

**Figure S47.** ESI-TOF spectrum for basic monomer **22g'-x** (ZJ10312;  $C_{187}H_{324}N_{56}O_{46}S$ ; expected  $[M+4H^+]/4 = 1031.620$  Da). Observed  $[M+4H^+]/4 = 1031.613$  Da.

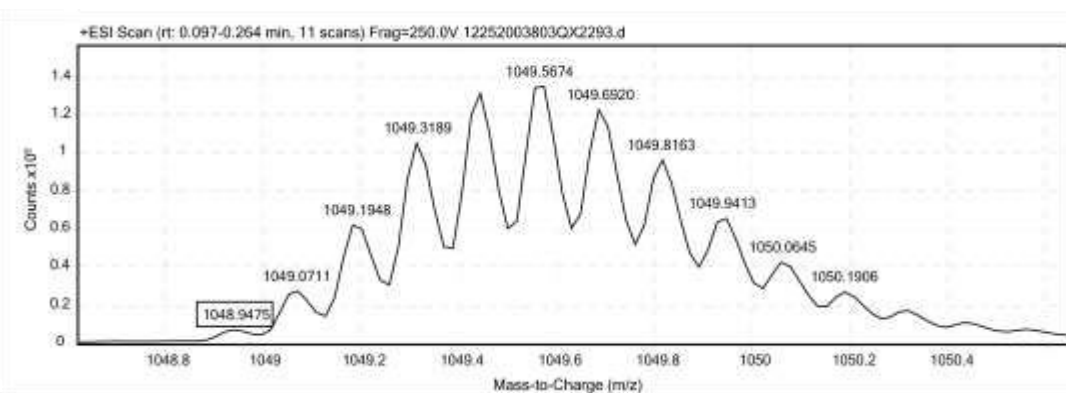

**Figure S48.** ESI-TOF spectrum for disulfide-bound coiled-coil variant **d27e/22g'-z2x** (QX2293;  $C_{368}H_{609}N_{107}O_{112}S_2$ ; expected  $[M+8H^+]/8 = 1048.942$  Da). Observed  $[M+8H^+]/8 = 1048.948$  Da.

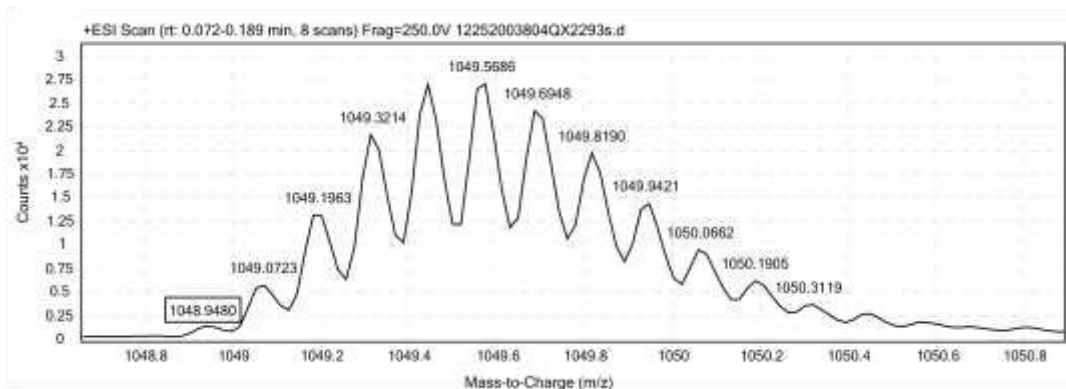

**Figure S49.** ESI-TOF spectrum for stapled disulfide-bound coiled-coil variant **sd27e/22g'-z2x** (QX2293s;  $C_{368}H_{609}N_{107}O_{112}S_2$ ; expected  $[M+8H^+]/8 = 1048.942$  Da). Observed  $[M+8H^+]/8 = 1048.948$  Da.

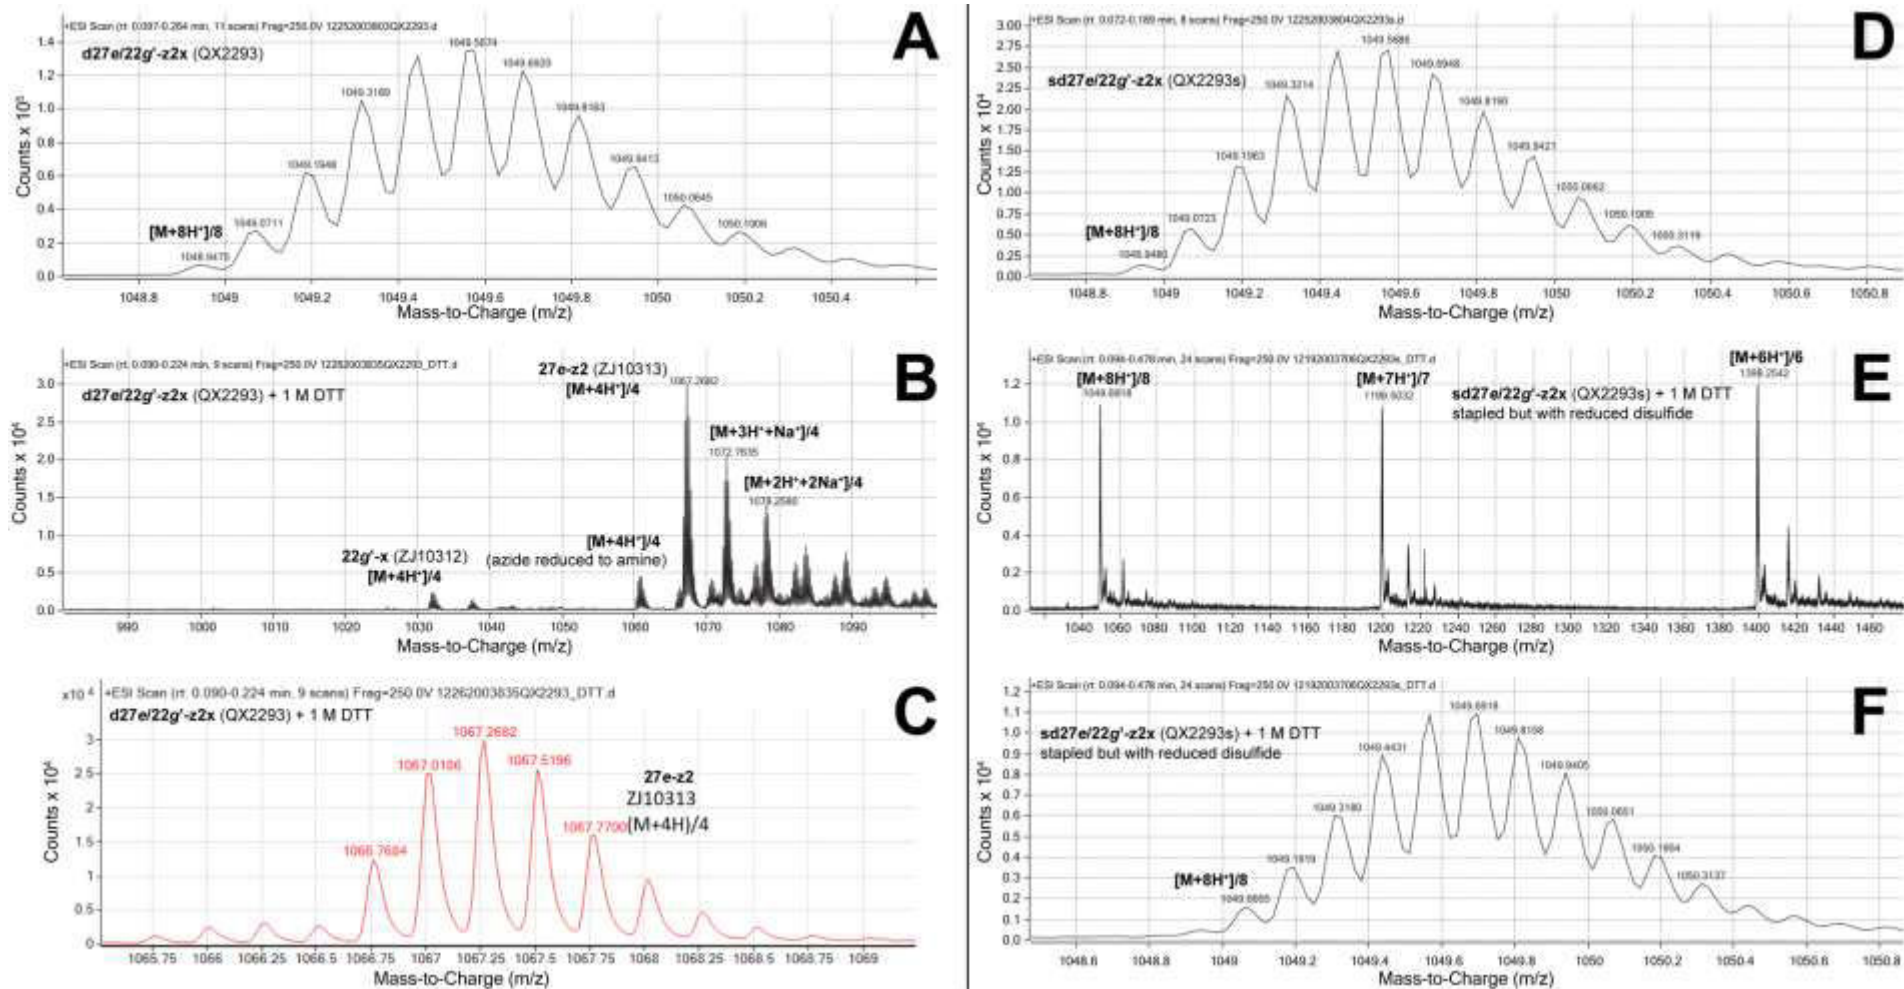

**Figure S50.** ESI-TOF MS data for (A) coiled-coil variant **d27e/22g'-z2x** before (QX2293;  $C_{368}H_{609}N_{107}O_{112}S_2$ ; expected  $[M+8H^+]/8 = 1048.942$  Da) and (B,C) after exposure to reducing conditions (1M DTT) for at least 8h. Following reduction, **d27e/22g'-z2x** splits into its component peptides: **27e-z2** (ZJ10313;  $C_{181}H_{286}N_{51}O_{66}S$ ; expected mass  $[M+4H^+]/4 = 1066.768$ ) and **22g'-x** (ZJ10312;  $C_{187}H_{324}N_{56}O_{46}S$ ; expected mass  $[M+4H^+]/4 = 1031.620$  Da). Also shown are ESI-TOF MS data for (D) triazole-stapled **sd27e/22g'-z2x** before (QX2293s;  $C_{368}H_{609}N_{107}O_{112}S_2$ ; expected  $[M+8H^+]/8 = 1048.942$  Da) and (E,F) after exposure to reducing conditions (1M DTT) for at least 8h ( $C_{368}H_{611}N_{107}O_{112}S_2$ ; expected  $[M+8H^+]/8 = 1049.194$  Da after reduction of disulfide bond to free cysteine residues). Note that **sd27e/22g'-z2x** remains intact even after disulfide reduction due to the triazole staple.

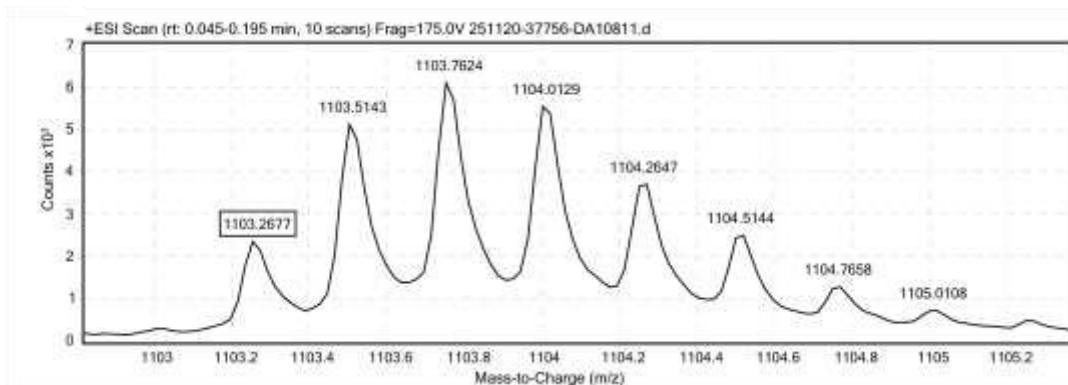

**Figure S51.** ESI-TOF spectrum for acidic monomer **24b-z4** (DA10811,  $C_{187}H_{297}N_{51}O_{70}S$ ). Expected  $[M+4H^+]/4 = 1103.282$  Da. Observed  $[M+4H^+]/4 = 1103.268$  Da.

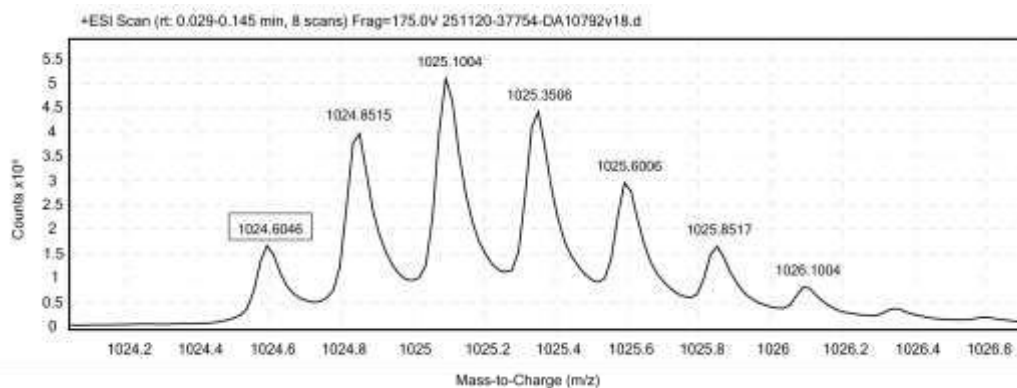

**Figure S52.** ESI-TOF spectrum for basic monomer **25c'-x** (DA10792;  $C_{187}H_{324}N_{54}O_{46}S$ ). Expected  $[M+4H^+]/4 = 1024.618$  Da. Observed  $[M+4H^+]/4 = 1024.605$  Da.

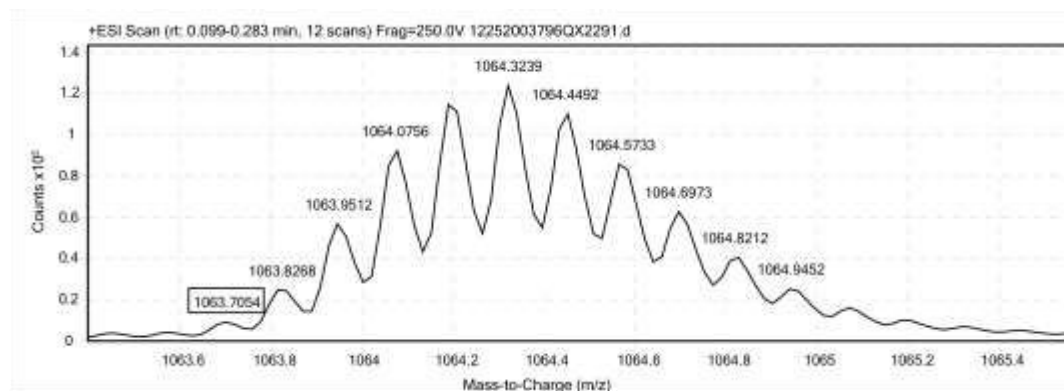

**Figure S53.** ESI-TOF spectrum for disulfide-bound coiled-coil variant **d24b/25c'-z4x** (QX2291,  $C_{374}H_{619}N_{105}O_{116}S_2$ ). Expected  $[M+8H^+]/8 = 1063.698$  Da. Observed  $[M+8H^+]/8 = 1063.705$  Da.

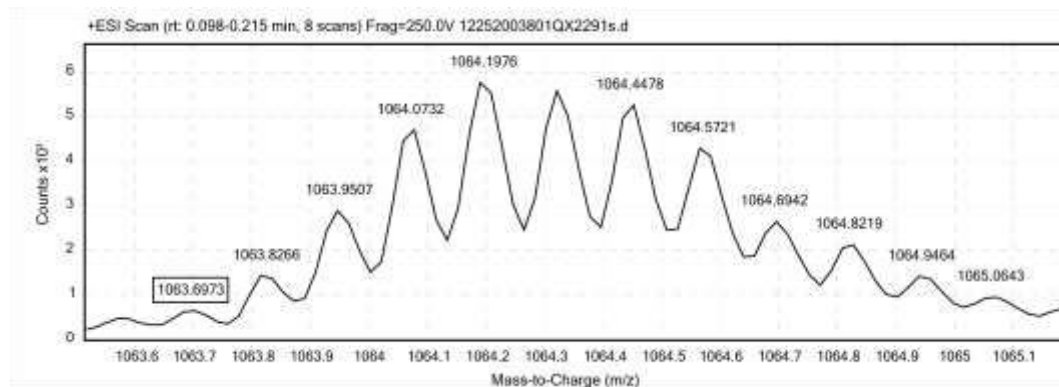

**Figure S54.** ESI-TOF spectrum for stapled disulfide-bound coiled-coil variant **sd24b/25c'-z4x** (QX2291s,  $C_{374}H_{619}N_{105}O_{116}S_2$ ). Expected  $[M+8H^+]/8 = 1063.698$  Da. Observed  $[M+8H^+]/8 = 1063.697$  Da.

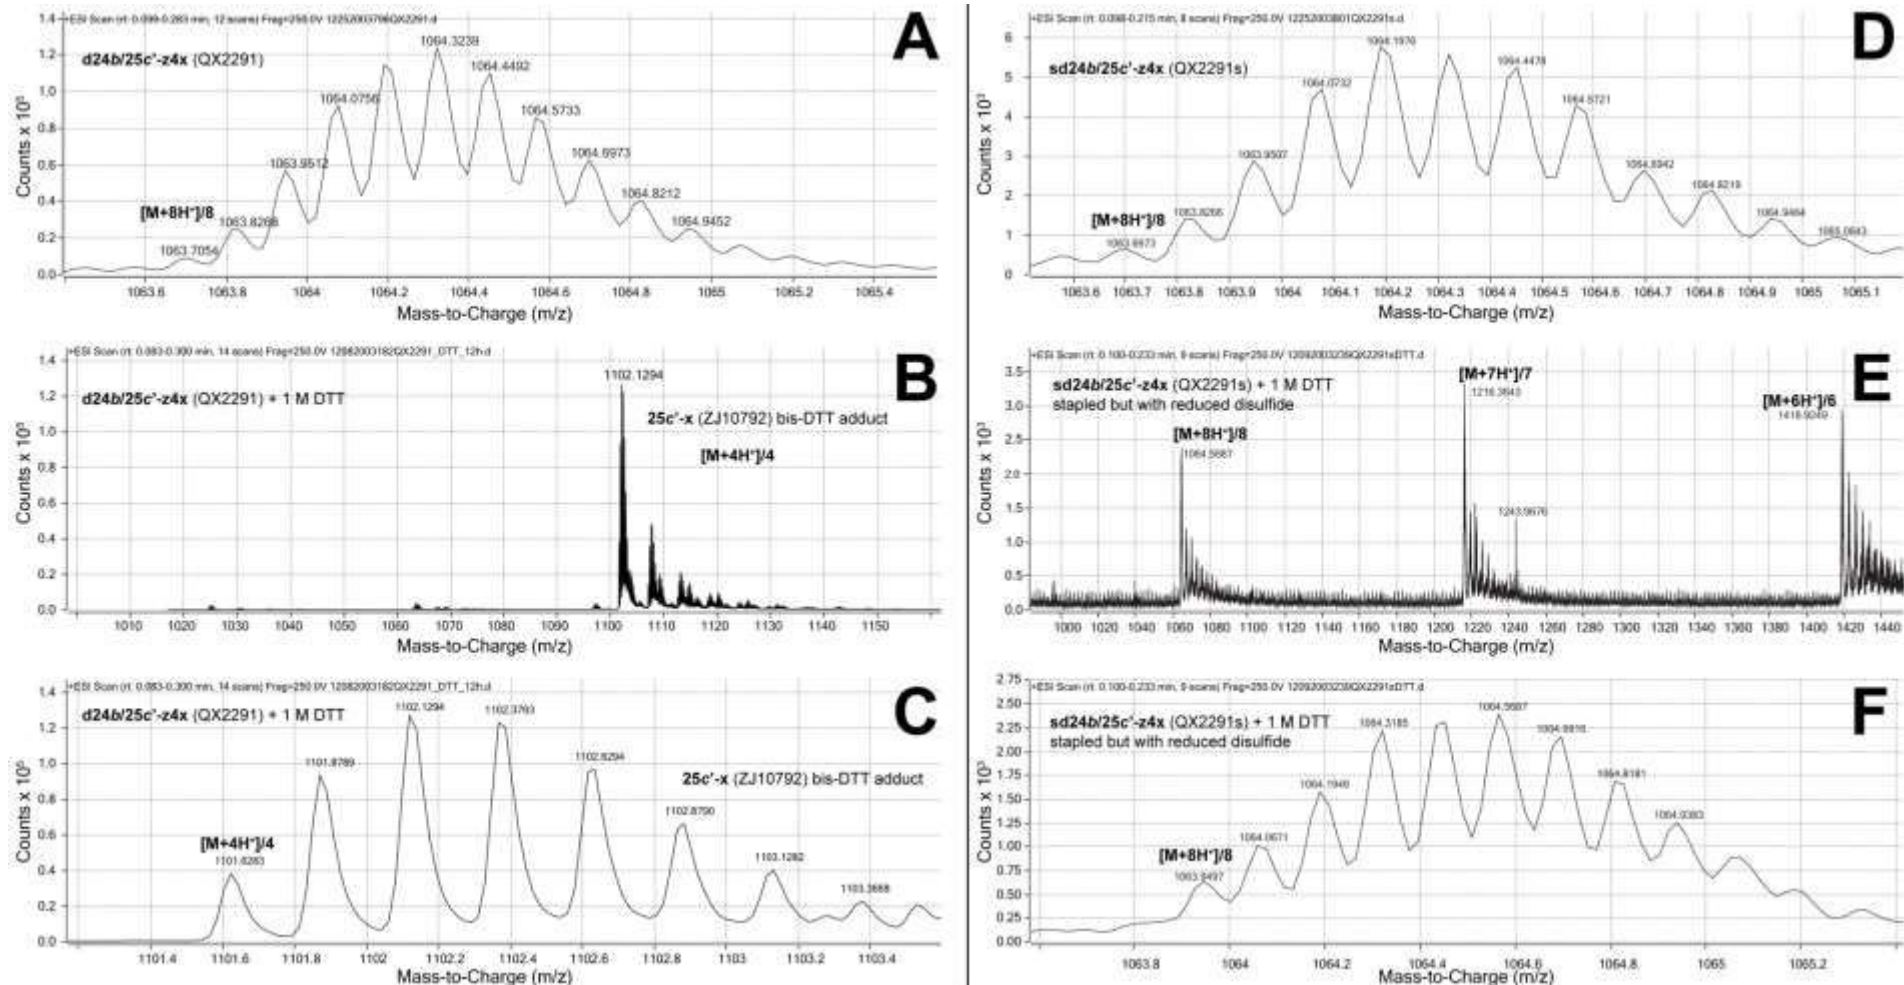

**Figure S55.** ESI-TOF MS data for (A) disulfide-bound coiled-coil variant **d24b/25c'-z4x** before (QX2291; C<sub>374</sub>H<sub>619</sub>N<sub>105</sub>O<sub>116</sub>S<sub>2</sub>; expected [M+8H<sup>+</sup>]/8 = 1063.698 Da) and (B,C) after exposure to reducing conditions (1M DTT) for at least 8h. Following reduction, **d24b/25c'-z4x** should split into its component peptides: **24b-z4** (DA10811; C<sub>187</sub>H<sub>297</sub>N<sub>51</sub>O<sub>70</sub>S; expected mass [M+4H<sup>+</sup>]/4 = 1103.282) and **25c'-x** (DA10792; C<sub>187</sub>H<sub>324</sub>N<sub>54</sub>O<sub>46</sub>S; expected mass [M+4H<sup>+</sup>]/4 = 1024.618 Da). However, neither of these appear in (B,C). Instead, we observe a peak with m/z = 1101.628 Da and isotopic spacing consistent with z = 4. This peak is consistent with bis-DTT adduct of **25c'-x** (C<sub>195</sub>H<sub>344</sub>N<sub>54</sub>O<sub>50</sub>S<sub>5</sub>; expected [M+4H<sup>+</sup>]/4 = 1101.624), which could be formed via tandem thiol-yne and thiol-ene reactions between the propargylglycine of **25c'-x** and two equivalents of DTT. Peptide **24b-4** does not appear in (B,C) for reasons that are unclear. Also shown are ESI-TOF MS data for (D) triazole-stapled disulfide-bound coiled-coil variant **sd24b/25c'-z4x** before (QX2291s; C<sub>374</sub>H<sub>619</sub>N<sub>105</sub>O<sub>116</sub>S<sub>2</sub>; expected [M+8H<sup>+</sup>]/8 = 1063.698 Da and (E,F) after exposure to reducing conditions (1M DTT) for at least 8h (C<sub>374</sub>H<sub>621</sub>N<sub>105</sub>O<sub>116</sub>S<sub>2</sub>; expected [M+8H<sup>+</sup>]/8 = 1063.950 Da after reduction of disulfide bond to free cysteine residues). Note that **sd24b/25c'-z4x** remains intact even after disulfide reduction due to the triazole staple.

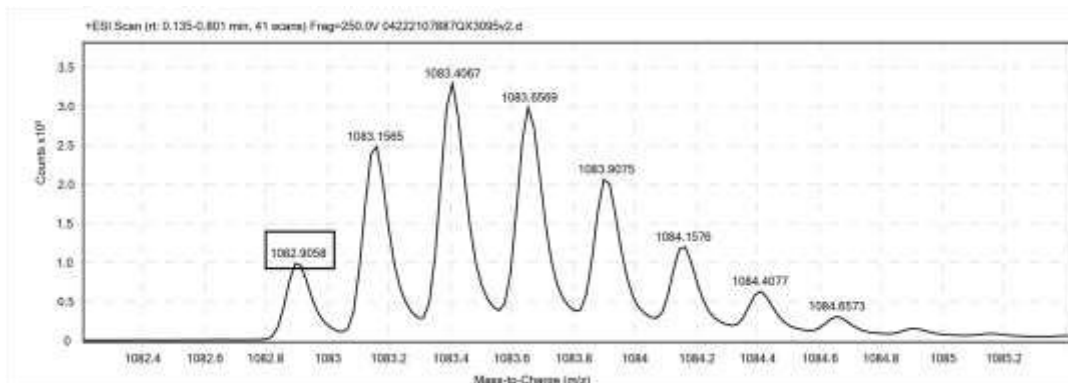

**Figure S56.** ESI-TOF spectrum for basic monomer variant **25c'-y4** (QX3095;  $C_{197}H_{343}N_{55}O_{51}S$ ; expected  $[M+4H^+]/4 = 1082.900$  Da. Observed  $[M+4H^+]/4 = 1082.906$  Da.

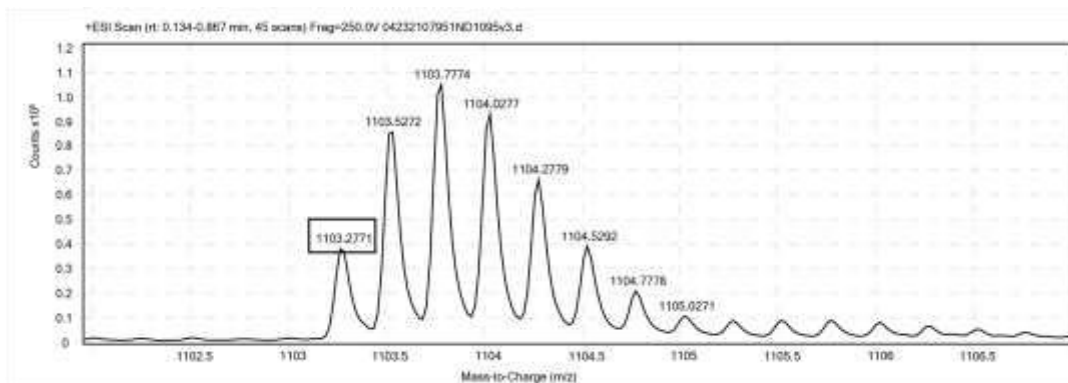

**Figure S57.** ESI-TOF spectrum for acidic monomer **24b-z4** (ND1095;  $C_{187}H_{297}N_{51}O_{70}S$ ; expected  $[M+4H^+]/4 = 1103.282$  Da). Observed  $[M+4H^+]/4 = 1103.277$  Da.

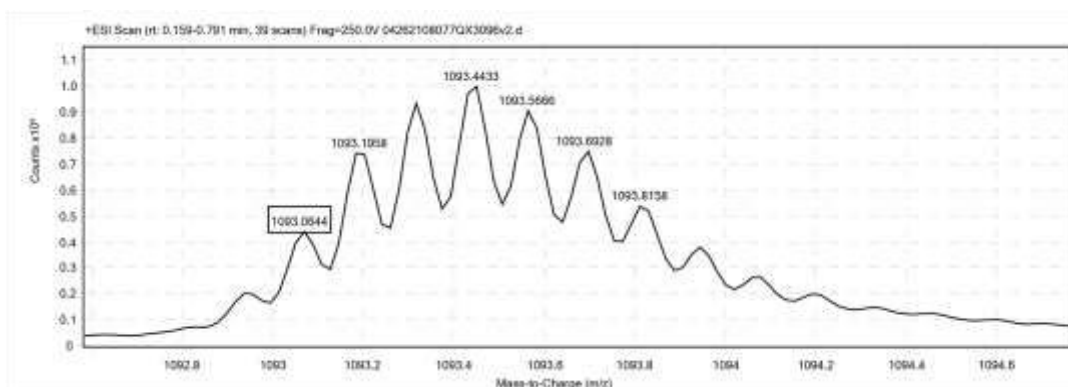

**Figure S58.** ESI-TOF spectrum for disulfide-bound coiled-coil variant **d24b/25c'-z4y4** (QX3096;  $C_{384}H_{638}N_{106}O_{121}S_2$ ; expected  $[M+8H^+]/8 = 1092.839$  Da). Observed  $[M+8H^+]/8 = 1093.064$  Da.

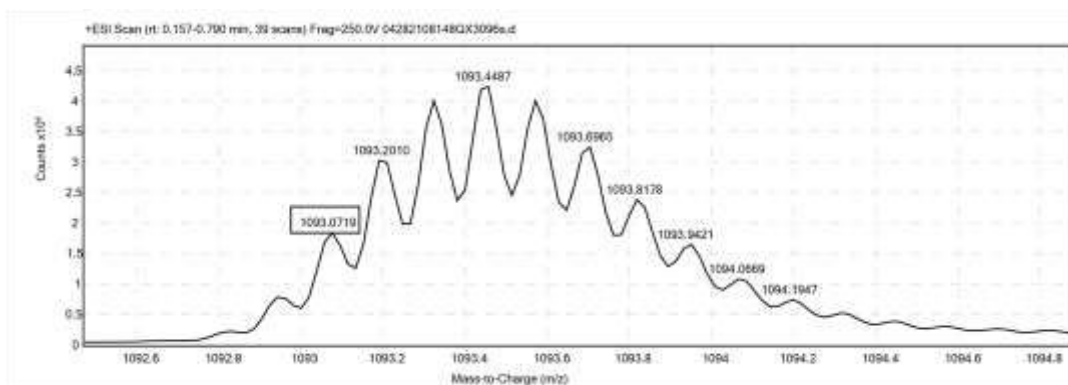

**Figure S59.** ESI-TOF spectrum for stapled disulfide-bound coiled-coil variant **sd24b/25c'-z4y4** (QX3096s;  $C_{384}H_{638}N_{106}O_{121}S_2$ ; expected  $[M+8H^+]/8 = 1092.839$  Da). Observed  $[M+8H^+]/8 = 1093.072$  Da.

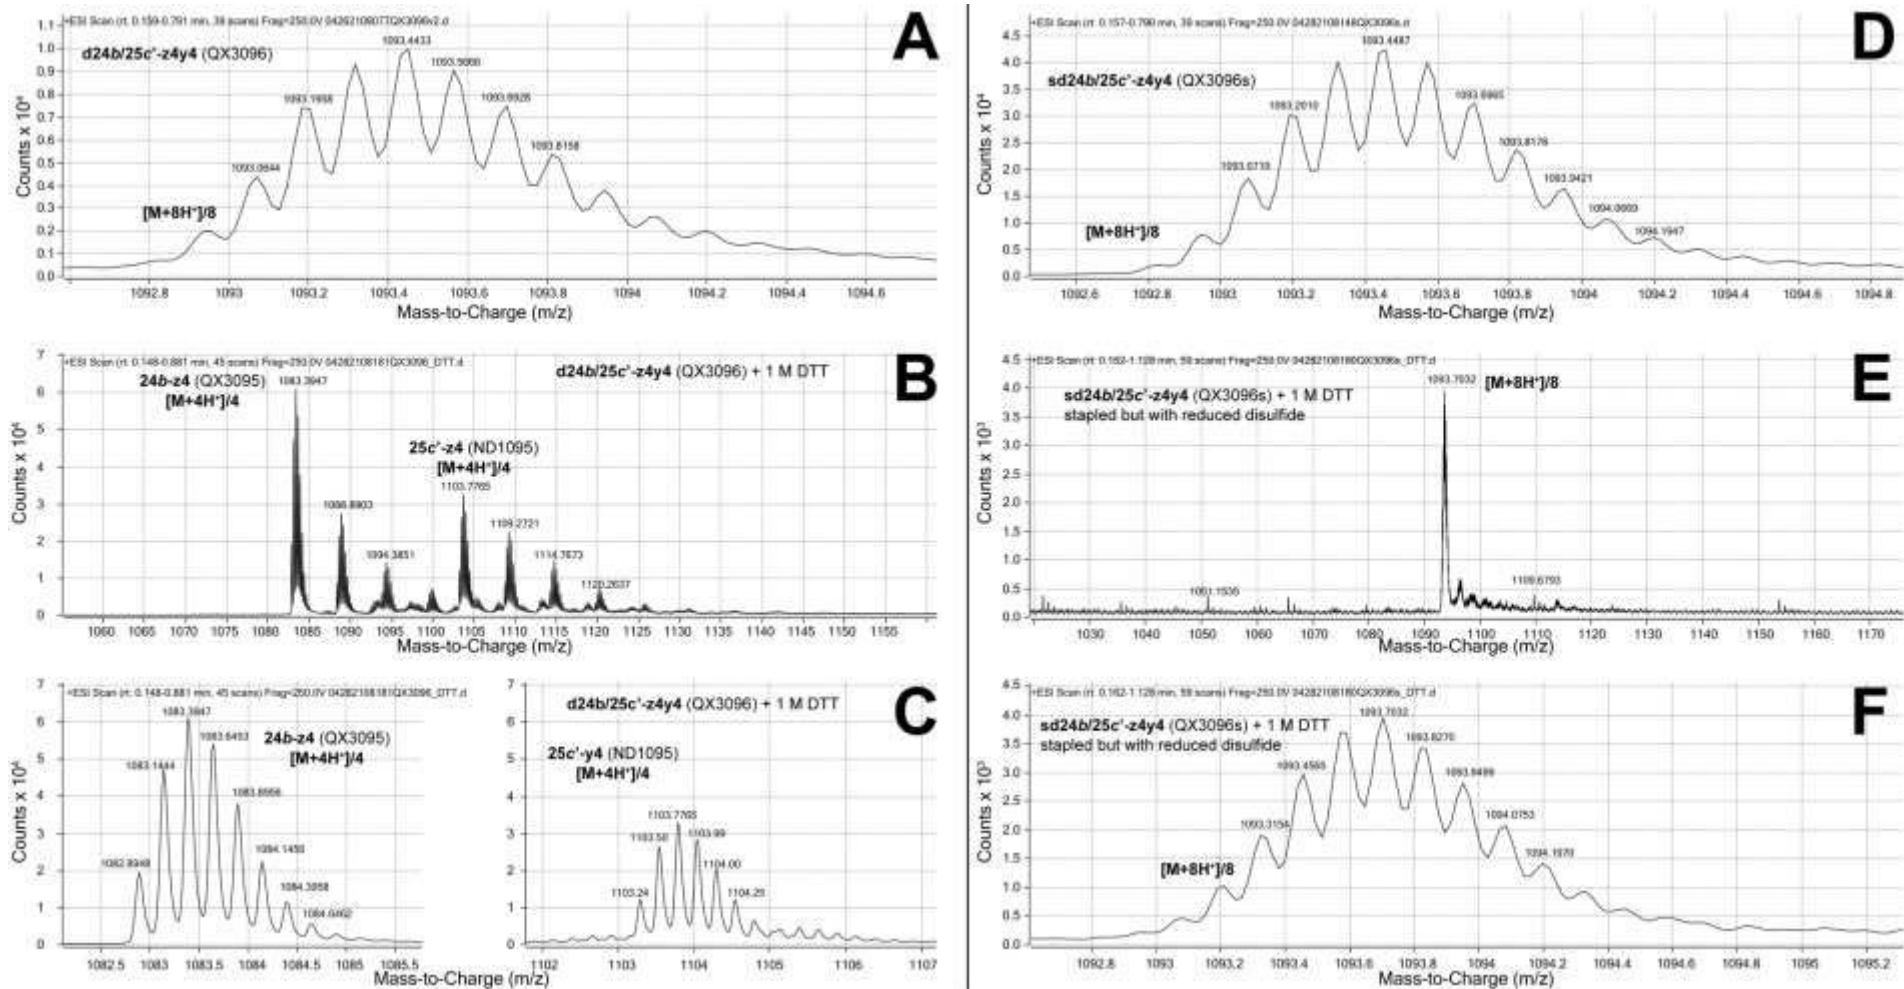

**Figure S60.** ESI-TOF MS data for (A) disulfide-bound coiled-coil variant **d24b/25c'-z4y4** before (QX3096; C<sub>384</sub>H<sub>638</sub>N<sub>106</sub>O<sub>121</sub>S<sub>2</sub>; expected [M+8H<sup>+</sup>]/8 = 1092.839 Da) and (B,C) after exposure to reducing conditions (1M DTT) for at least 8h. Following reduction, **d24b/25c'-z4y4** splits into its component peptides: **24b-z4** (QX3095; C<sub>197</sub>H<sub>343</sub>N<sub>55</sub>O<sub>51</sub>S; expected mass [M+4H<sup>+</sup>]/4 = 1082.900 Da) and **25c'-y4** (ND1095; C<sub>187</sub>H<sub>297</sub>N<sub>51</sub>O<sub>70</sub>S; expected mass [M+4H<sup>+</sup>]/4 = 1103.282 Da). Also shown are ESI-TOF MS data for (D) triazole-stapled disulfide-bound coiled-coil variant **sd24b/25c'-z4y4** before (QX3096s; C<sub>384</sub>H<sub>638</sub>N<sub>106</sub>O<sub>121</sub>S<sub>2</sub>; expected [M+8H<sup>+</sup>]/8 = 1092.839 Da) and (E,F) after exposure to reducing conditions (1M DTT) for at least 8h (C<sub>384</sub>H<sub>640</sub>N<sub>106</sub>O<sub>121</sub>S<sub>2</sub>; expected [M+8H<sup>+</sup>]/8 = 1093.091 Da after reduction of disulfide bond to free cysteine residues). Note that **sd24b/25c'-z4y4** remains intact even after disulfide reduction due to the triazole staple.

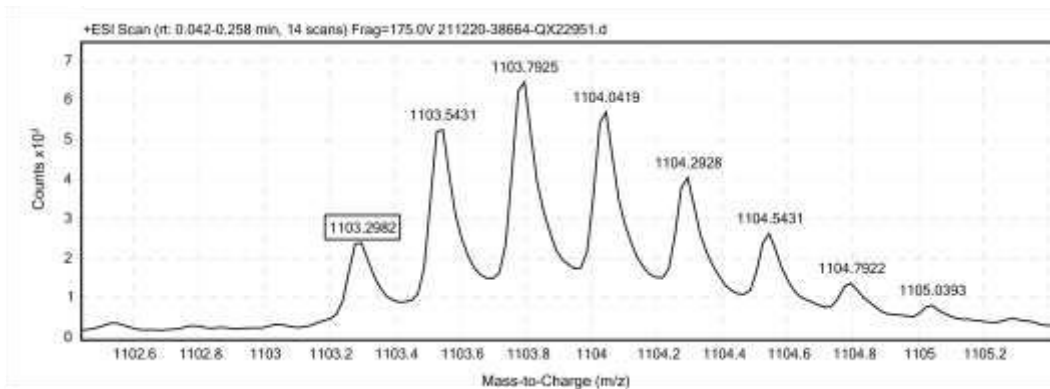

**Figure S61.** ESI-TOF spectrum for acidic monomer **7f-z4** (QX22951;  $C_{187}H_{297}N_{51}O_{70}S$ ; expected  $[M+4H^+]/4 = 1103.282$  Da). Observed  $[M+4H^+]/4 = 1103.298$  Da.

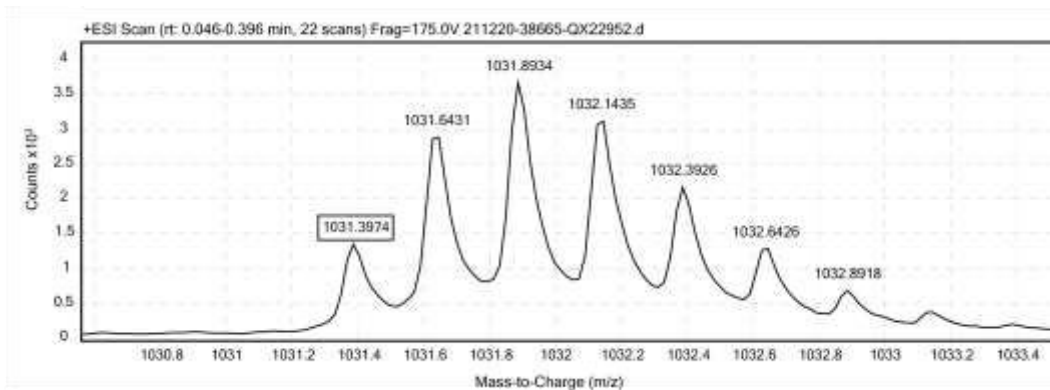

**Figure S62.** ESI-TOF spectrum for basic monomer **10b'-x** (QX22952;  $C_{188}H_{329}N_{57}O_{44}S$ ; expected  $[M+4H^+]/4 = 1031.383$  Da). Observed  $[M+4H^+]/4 = 1031.397$  Da.

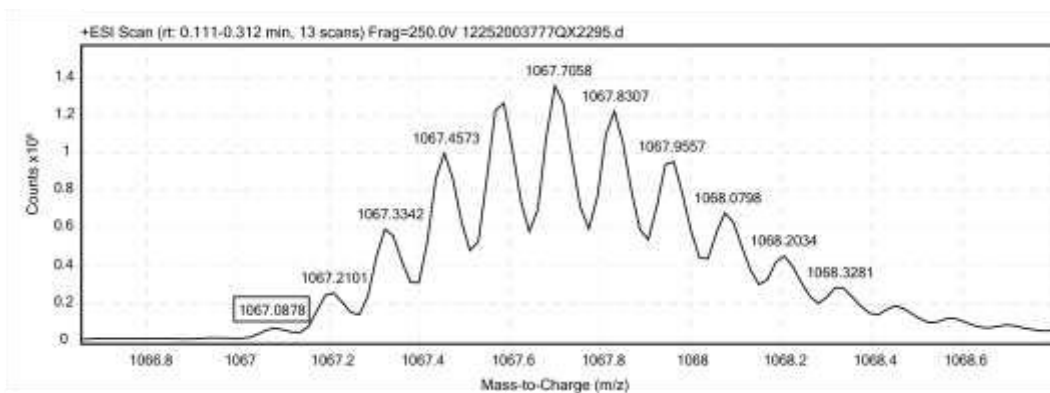

**Figure S63.** ESI-TOF spectrum for disulfide-bound coiled-coil **d7f/10b'-z4x** (QX2295;  $C_{375}H_{624}N_{108}O_{114}S_2$ ; expected  $[M+8H^+]/8 = 1067.081$  Da). Observed  $[M+8H^+]/8 = 1067.088$  Da.

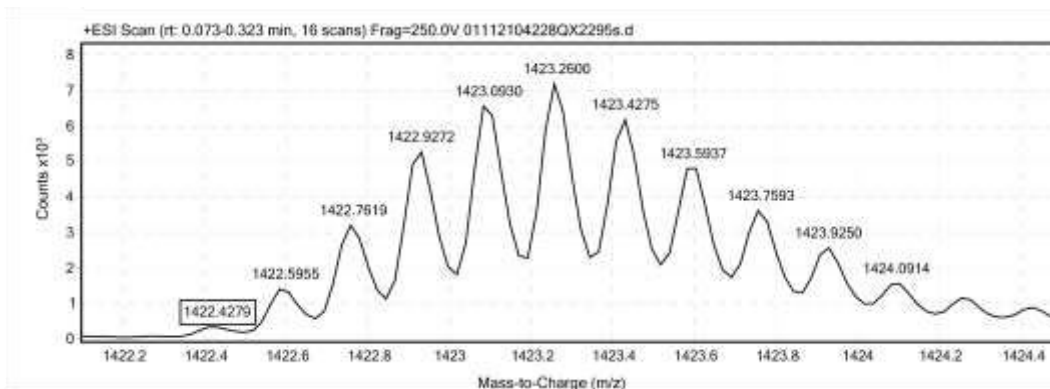

**Figure S64.** ESI-TOF spectrum for stapled disulfide-bound coiled-coil variant **sd7f/10b'-z4x** (QX2295s;  $C_{375}H_{624}N_{108}O_{114}S_2$ ; expected  $[M+6H^+]/6 = 1422.438$  Da). Observed  $[M+6H^+]/6 = 1422.428$  Da.



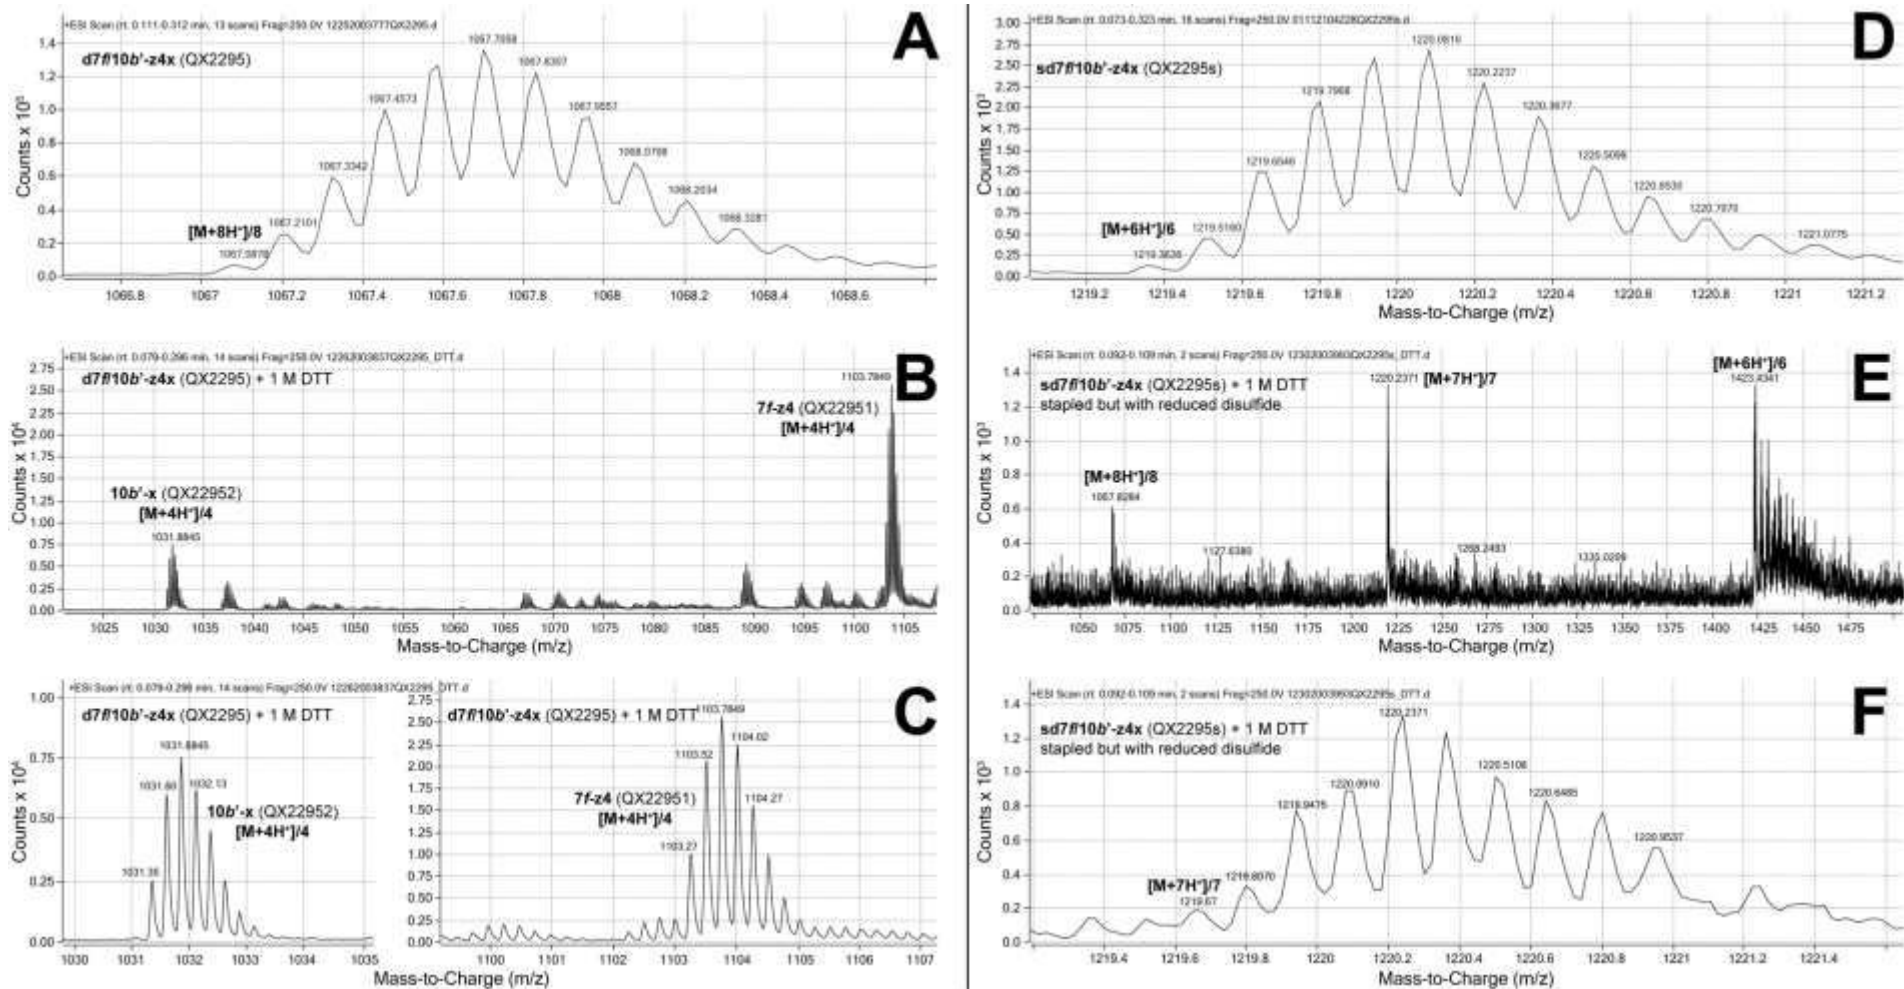

**Figure S65.** ESI-TOF MS data for (A) disulfide-bound coiled-coil variant **d7f10b'-z4x** before (QX2295; C<sub>375</sub>H<sub>624</sub>N<sub>108</sub>O<sub>114</sub>S<sub>2</sub>; expected  $[M+8H^+]_8 = 1067.081$  Da) and (B,C) after exposure to reducing conditions (1M DTT) for at least 8h. Following reduction, **d7f10b'-z4x** splits into its component peptides: **7f-z4** (QX22951; C<sub>188</sub>H<sub>297</sub>N<sub>51</sub>O<sub>70</sub>S; expected mass  $[M+4H^+]_4 = 1103.282$ ) and **10b'-x** (QX22952; C<sub>188</sub>H<sub>329</sub>N<sub>57</sub>O<sub>44</sub>S; expected mass  $[M+4H^+]_4 = 1031.383$  Da). Also shown are ESI-TOF MS data for (D) triazole-stapled disulfide-bound coiled-coil variant **sd7f10b'-z4x** before (QX2295s; C<sub>375</sub>H<sub>624</sub>N<sub>108</sub>O<sub>114</sub>S<sub>2</sub>; expected  $[M+7H^+]_7 = 1219.377$  Da) and (E,F) after exposure to reducing conditions (1M DTT) for at least 8h (C<sub>375</sub>H<sub>626</sub>N<sub>108</sub>O<sub>114</sub>S<sub>2</sub>; expected  $[M+7H^+]_7 = 1219.665$  Da after reduction of disulfide bond to free cysteine residues). Note that **sd7f10b'-z4x** remains intact even after disulfide reduction due to the triazole staple.

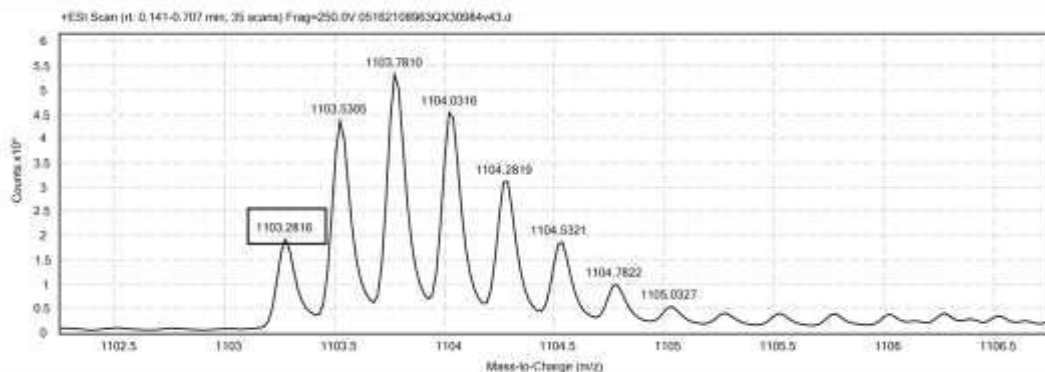

**Figure S66.** ESI-TOF spectrum for coiled-coil variant **7f-z4** (QX30984;  $C_{187}H_{297}N_{51}O_{70}S$ ; expected  $[M+4H^+]/4 = 1103.282$  Da). Observed  $[M+4H^+]/4 = 1103.282$  Da.

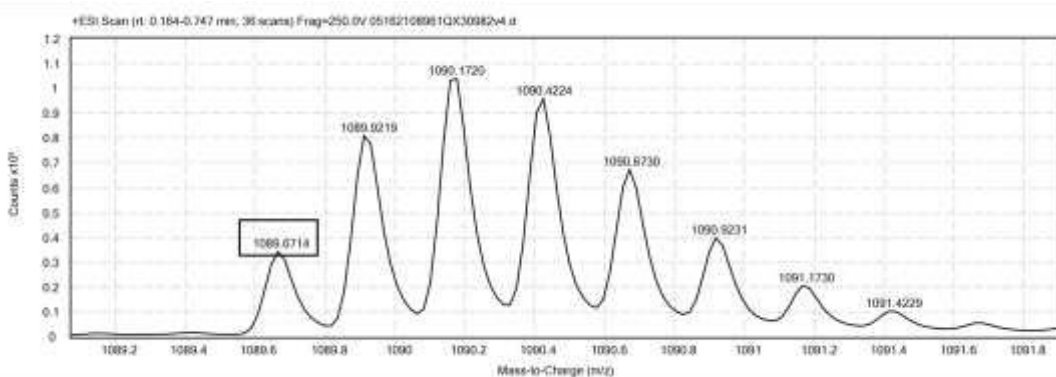

**Figure S67.** ESI-TOF spectrum for coiled-coil variant **10b'-y4** (QX30982;  $C_{198}H_{348}N_{58}O_{49}S$ ; expected  $[M+4H^+]/4 = 1089.664$  Da). Observed  $[M+4H^+]/4 = 1089.671$  Da.

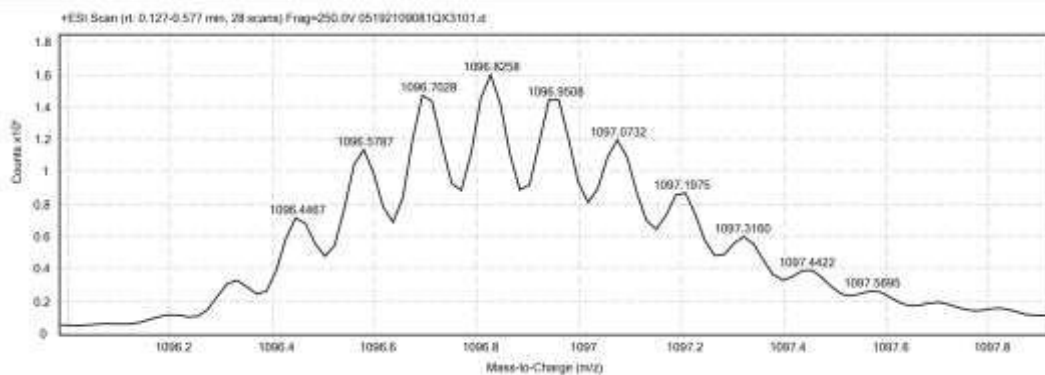

**Figure S68.** ESI-TOF spectrum for coiled-coil variant **d7f/10b'-z4y4** (QX3101;  $C_{385}H_{643}N_{109}O_{119}S_2$ ; expected  $[M+8H^+]/8 = 1096.221$  Da). Observed  $[M+8H^+]/8 = 1096.447$  Da.

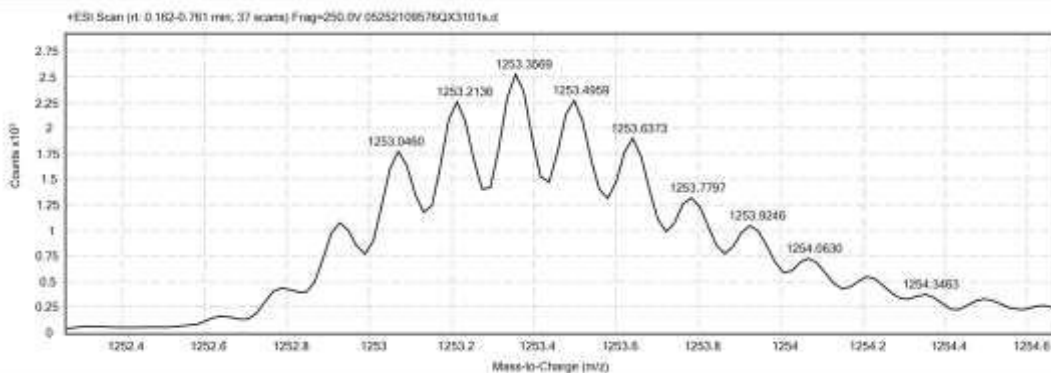

**Figure S69.** ESI-TOF spectrum for coiled-coil variant **sd7f/10b'-z4y4** (QX3101s;  $C_{385}H_{643}N_{109}O_{119}S_2$ ; expected  $[M+7H^+]/7 = 1252.680$  Da). Observed  $[M+8H^+]/8 = 1253.046$  Da.

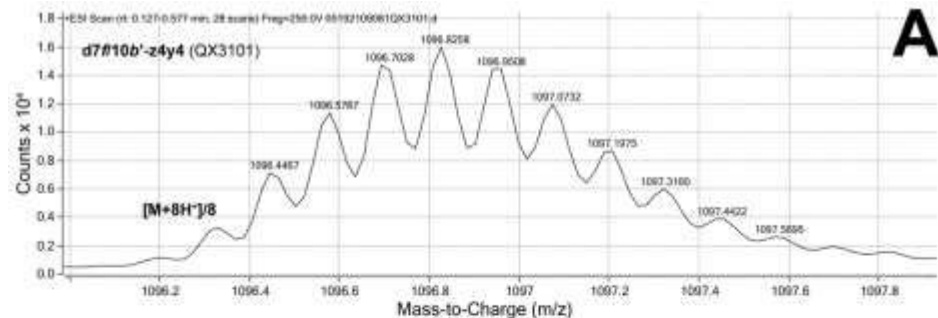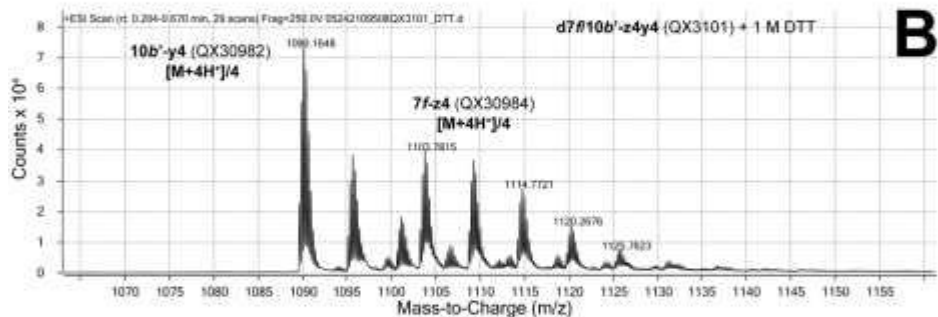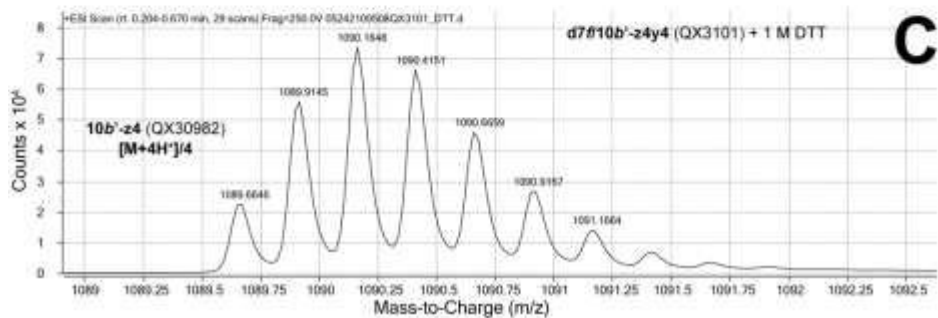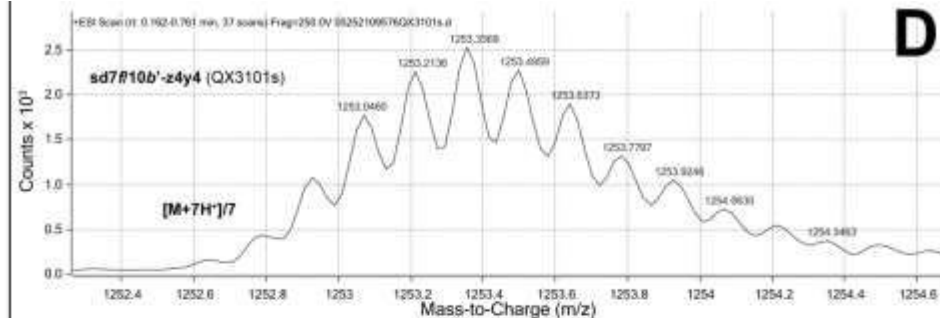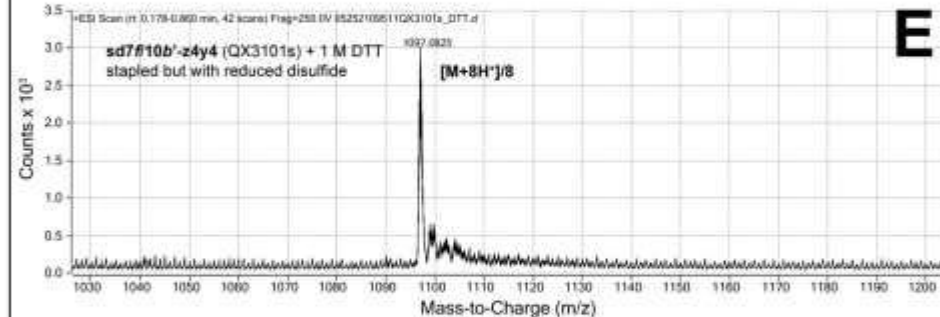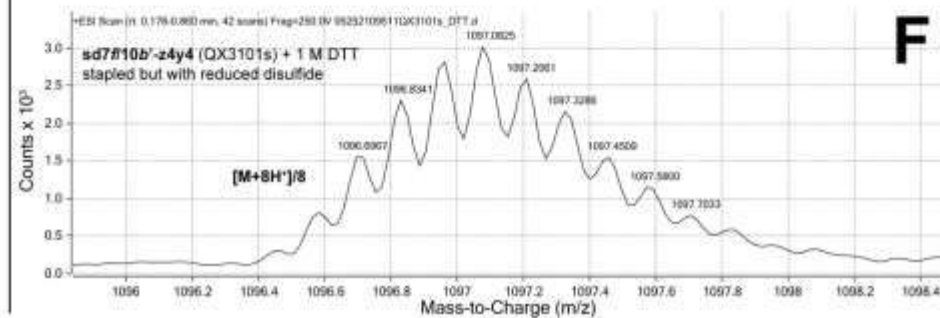

**Figure S70.** ESI-TOF MS data for (A) disulfide-bound coiled-coil variant **d7f10b'-z4y4** before (QX3101;  $C_{385}H_{643}N_{109}O_{119}S_2$ ; expected  $[M+8H^+]_8 = 1096.221$  Da) and (B,C) after exposure to reducing conditions (1M DTT) for at least 8h. Following reduction, **d7f10b'-z4y4** splits into its component peptides: **7f-z4** (QX30984;  $C_{187}H_{297}N_{51}O_{70}S$ ; expected mass  $[M+4H^+]_4 = 1103.282$  Da) and **10b'-y4** (QX30982;  $C_{198}H_{348}N_{58}O_{49}S$ ; expected mass  $[M+4H^+]_4 = 1089.664$  Da). Also shown are ESI-TOF MS data for (D) triazole-stapled disulfide-bound coiled-coil variant **sd7f10b'-z4y4** before (QX3101s;  $C_{385}H_{643}N_{109}O_{119}S_2$ ; expected  $[M+8H^+]_8 = 1096.221$  Da) and (E,F) after exposure to reducing conditions (1M DTT) for at least 8h ( $C_{385}H_{645}N_{109}O_{119}S_2$ ; expected  $[M+8H^+]_8 = 1096.473$  Da after reduction of disulfide bond to free cysteine residues). Note that **sd7f10b'-z4y4** remains intact even after disulfide reduction due to the triazole staple.

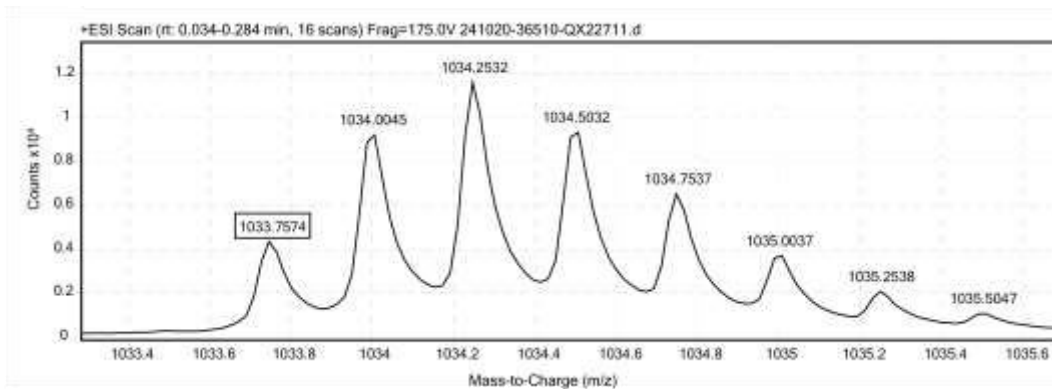

**Figure S71.** ESI-TOF spectrum for acidic monomer **27e-x** (QX22711;  $C_{178}H_{279}N_{47}O_{64}S$ ; expected  $[M+4H^+]/4 = 1033.752$  Da). Observed  $[M+4H^+]/4 = 1033.757$  Da.

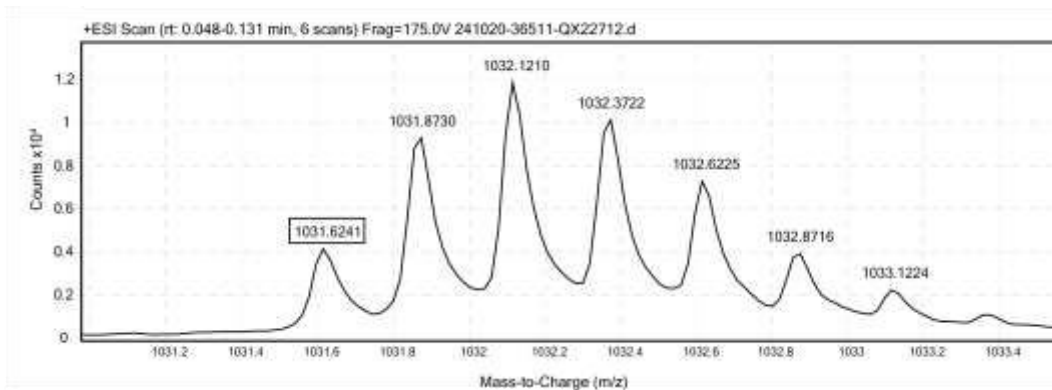

**Figure S72.** ESI-TOF spectrum for basic monomer **29g'-x** (QX22712;  $C_{187}H_{324}N_{56}O_{46}S$ ; expected  $[M+4H^+]/4 = 1031.620$  Da). Observed  $[M+4H^+]/4 = 1031.624$  Da.

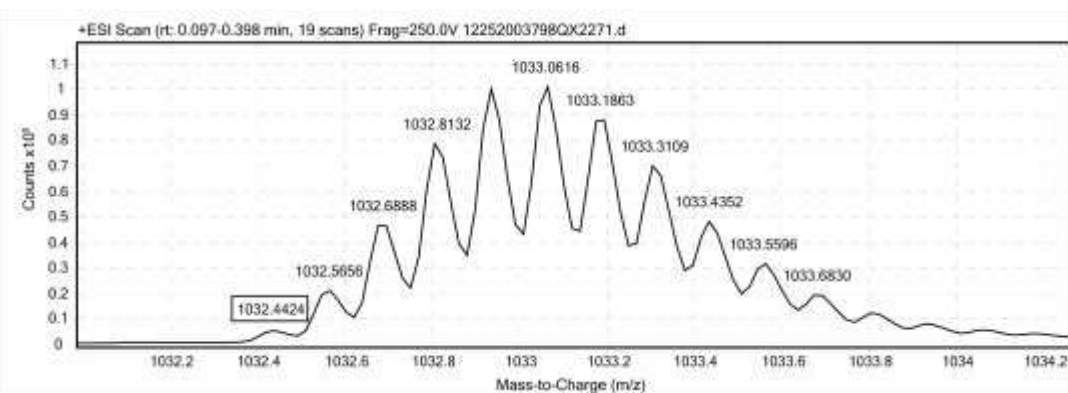

**Figure S73.** ESI-TOF spectrum for disulfide-bound coiled-coil variant **d27e/29g'-xx** (QX2271;  $C_{365}H_{601}N_{103}O_{110}S_2$ ; expected  $[M+8H^+]/8 = 1032.434$  Da). Observed  $[M+8H^+]/8 = 1032.442$  Da.

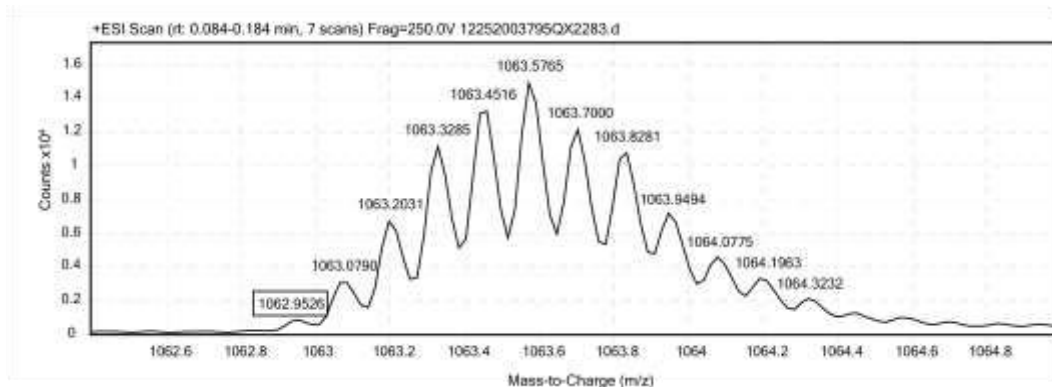

**Figure S74.** ESI-TOF spectrum for stapled disulfide-bound coiled-coil variant **sd27e/29g'-x4x** (QX2283;  $C_{373}H_{617}N_{109}O_{113}S_2$ ; expected  $[M+8H^+]/8 = 1062.950$  Da). Observed  $[M+8H^+]/8 = 1062.952$  Da.

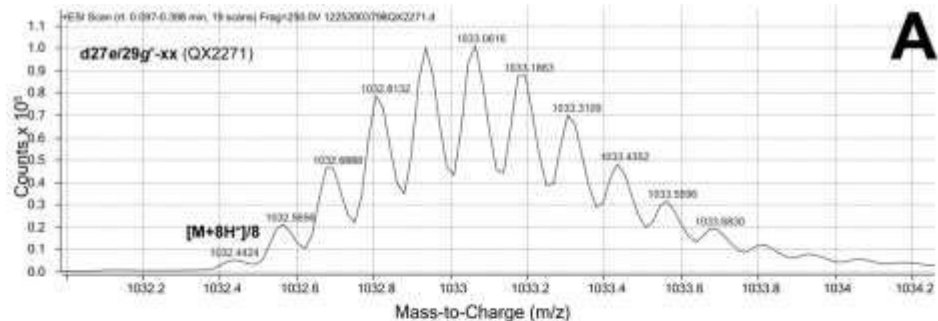

**A**

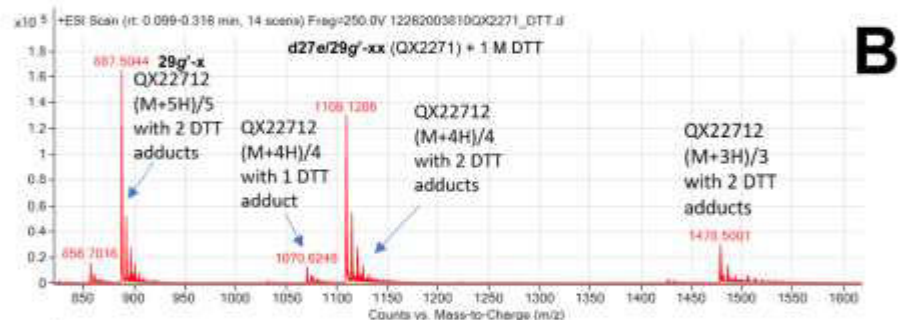

**B**

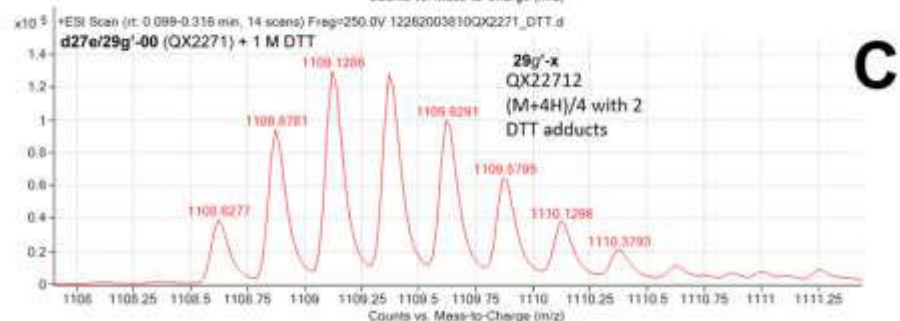

**C**

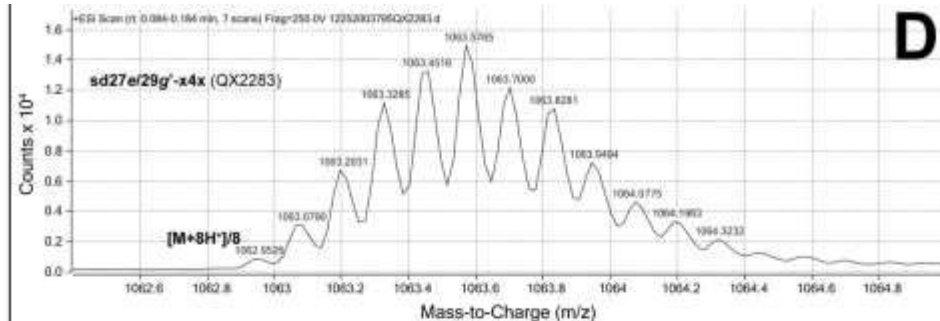

**D**

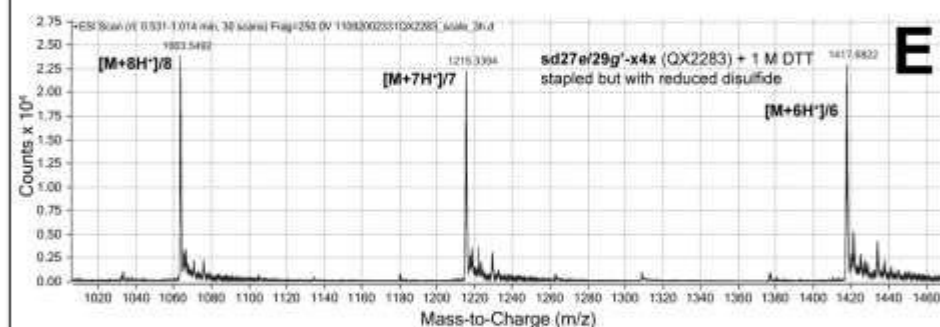

**E**

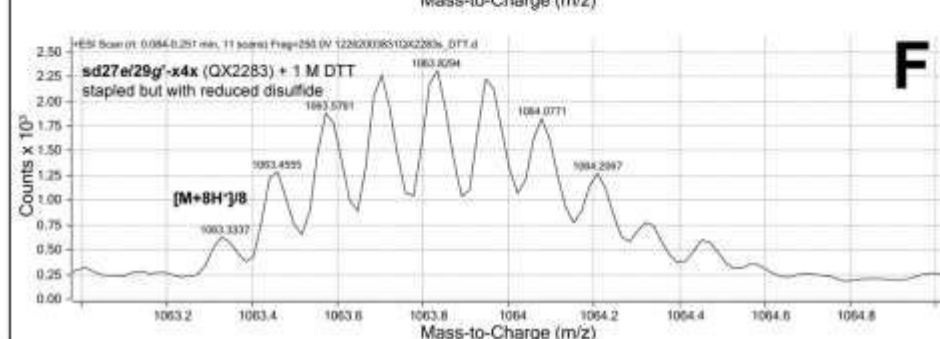

**F**

**Figure S75.** ESI-TOF MS data for (A) disulfide-bound coiled-coil variant **d27e/29g'-xx** before (QX2271;  $C_{365}H_{601}N_{103}O_{110}S_2$ ; expected  $[M+8H]^+/8 = 1032.434$  Da) and (B,C) after exposure to reducing conditions (1M DTT) for at least 8h. Following reduction, **d27e/29g'-xx** splits into its component peptides: **27e-x** (QX22711;  $C_{178}H_{279}N_{47}O_{64}S$ ; expected mass  $[M+4H]^+/4 = 1033.752$ ) and **29g'-x** (QX22712;  $C_{187}H_{324}N_{56}O_{46}S$ ; expected mass  $[M+4H]^+/4 = 1031.620$  Da). However, neither of these appear in (B,C). Instead, we observe a peak with  $m/z = 1108.6277$  Da and isotopic spacing consistent with  $z = 4$ . This peak is consistent with bis-DTT adduct of **29g'-x** ( $C_{195}H_{344}N_{56}O_{50}S_5$ ; expected  $[M+4H]^+/4 = 1108.626$ ), which could be formed via tandem thiol-yne and thiol-ene reactions between the propargylglycine of **29g'-x** and two equivalents of DTT. Peptide **27e-x** does not appear in (B,C) for reasons that are unclear. Also shown are ESI-TOF MS data for (D) triazole-stapled disulfide-bound coiled-coil variant **sd27e/29g'-x4x** before (QX2283;  $C_{373}H_{617}N_{109}O_{113}S_2$ ; expected  $[M+8H]^+/8 = 1062.950$  Da) and (E,F) after exposure to reducing conditions (1M DTT) for at least 8h ( $C_{373}H_{619}N_{109}O_{113}S_2$ ; expected  $[M+8H]^+/8 = 1063.202$  Da after reduction of disulfide bond to free cysteine residues). Note that **sd27e/29g'-x4x** remains intact even after disulfide reduction due to the triazole staple.

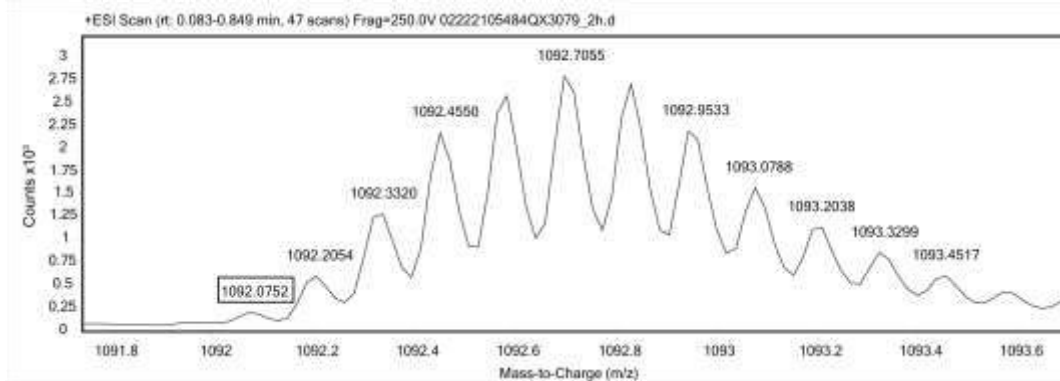

**Figure S76.** ESI-TOF spectrum for stapled disulfide-bound coiled-coil variant **sd27e/29g'-x4px** (QX3079;  $C_{383}H_{636}N_{110}O_{118}S_2$ ; expected  $[M+8H^+]/8 = 1092.090$  Da). Observed  $[M+8H^+]/8 = 1092.075$  Da.

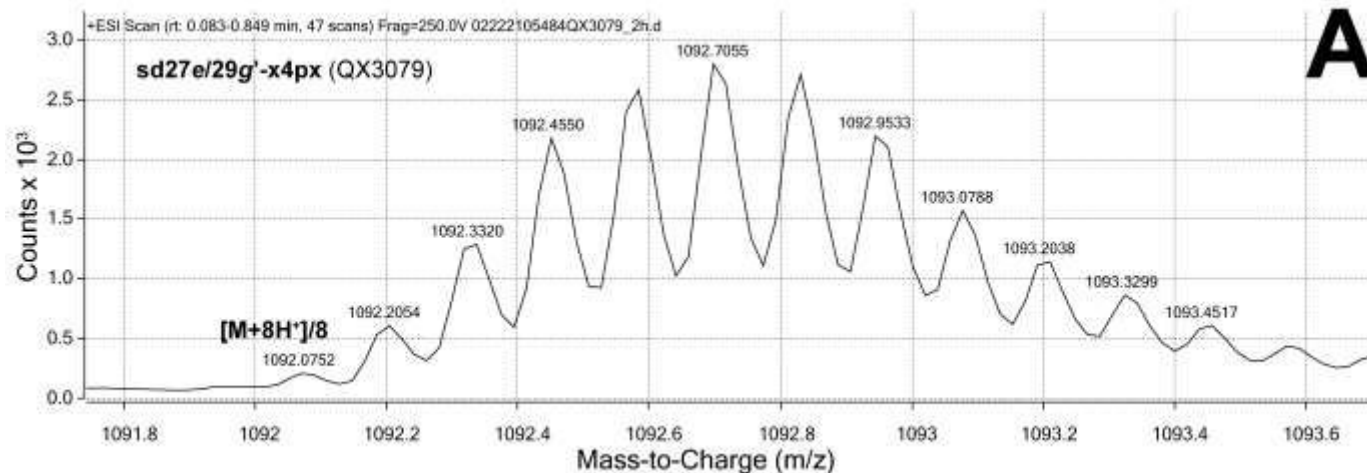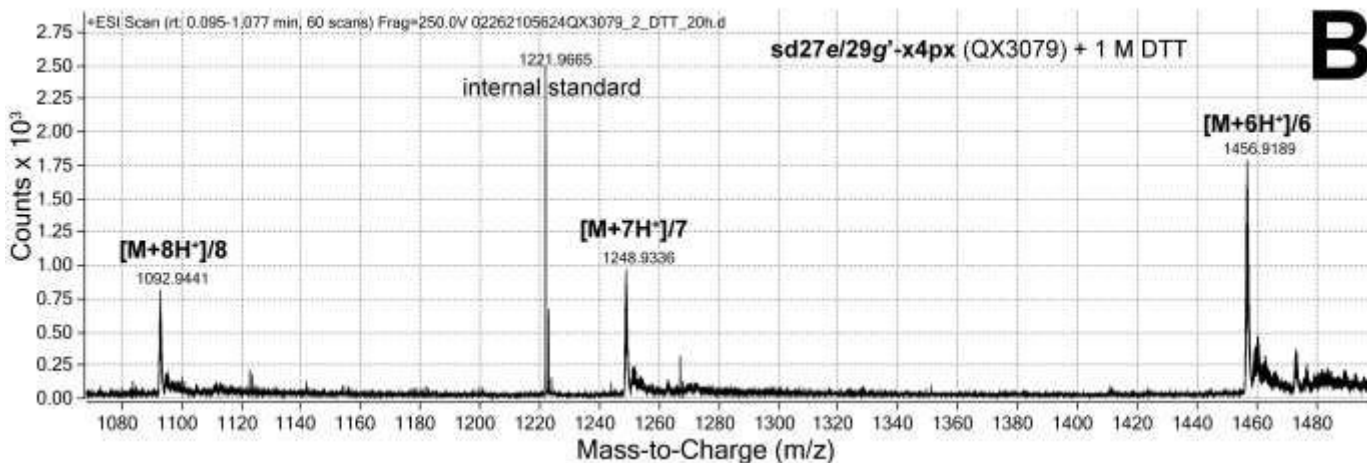

**Figure S77.** ESI-TOF MS data for (A) bis-triazole-stapled disulfide-bound coiled-coil variant **sd27e/29g'-x4px** (QX3079;  $C_{383}H_{636}N_{110}O_{118}S_2$ ; expected  $[M+8H^+]/8 = 1092.090$  Da) and (B) after exposure to reducing conditions (1M DTT) for at least 8h ( $C_{383}H_{638}N_{110}O_{118}S_2$ ; expected  $[M+8H^+]/8 = 1092.342$  Da after reduction of disulfide bond to free cysteine residues). Note that **sd27e/29g'-x4px** remains intact even after disulfide reduction due to the bis-triazole staple.

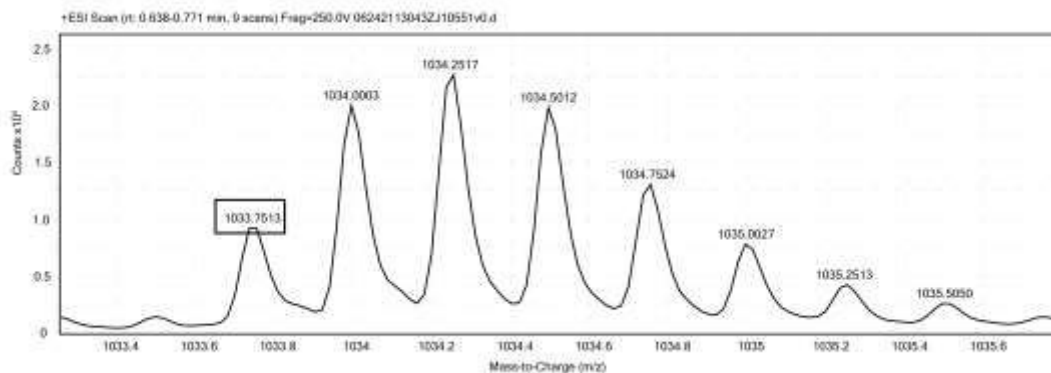

**Figure S78.** ESI-TOF spectrum for acidic monomer (***R***)-**27e-x** (ZJ10551;  $C_{178}H_{279}N_{47}O_{64}S$ ; expected  $[M+8H^+]/8 = 1033.752$  Da). Observed  $[M+8H^+]/8 = 1033.751$  Da.

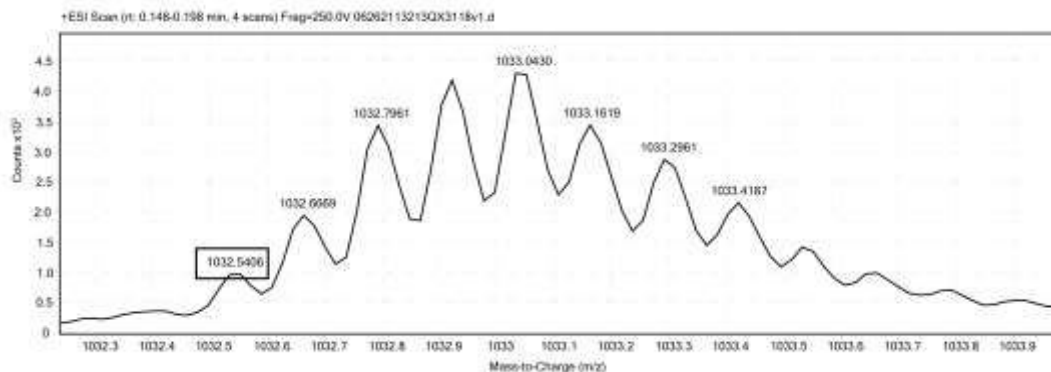

**Figure S79.** ESI-TOF spectrum for disulfide-bound coiled-coil variant (***R,S***)-**d27e/29g'-xx** (QX3118;  $C_{365}H_{601}N_{103}O_{110}S_2$ ; expected  $[M+8H^+]/8 = 1032.434$  Da). Observed  $[M+8H^+]/8 = 1033.541$  Da.

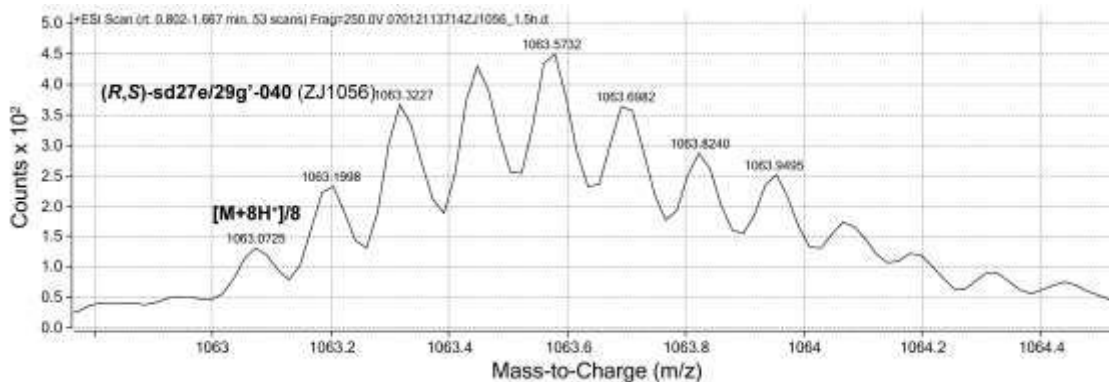

**Figure S80.** ESI-TOF spectrum for stapled disulfide-bound coiled-coil variant (***R,S***)-**sd27e/29g'-x4x** (ZJ1056;  $C_{373}H_{617}N_{109}O_{113}S_2$ ; expected  $[M+8H^+]/8 = 1062.950$  Da). Observed  $[M+8H^+]/8 = 1063.073$  Da.

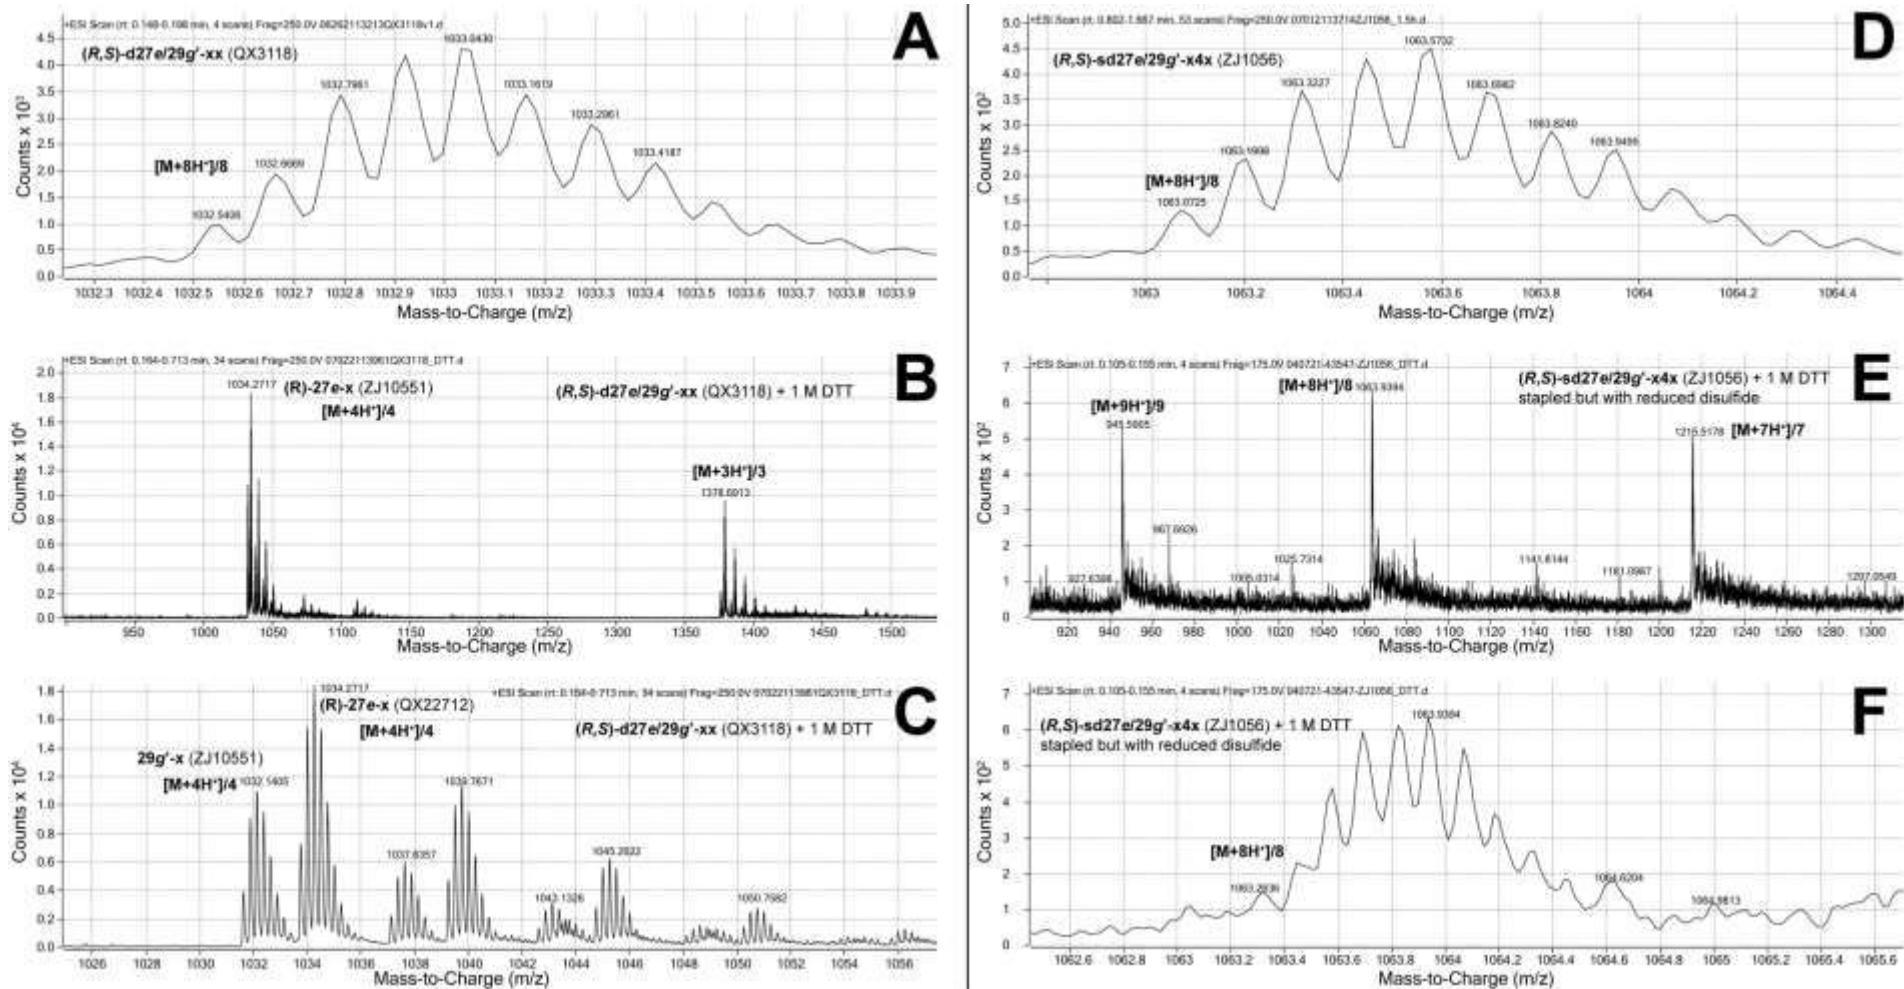

**Figure S81.** ESI-TOF MS data for (A) disulfide-bound coiled-coil variant *(R,S)*-d27e/29g'-xx before (QX3118; C<sub>365</sub>H<sub>601</sub>N<sub>103</sub>O<sub>110</sub>S<sub>2</sub>; expected [M+8H<sup>+</sup>]/8 = 1032.434 Da) and (B,C) after exposure to reducing conditions (1M DTT) for at least 8h. Following reduction, *(R,S)*-d27e/29g'-xx splits into its component peptides: *(R)*-27e-x (ZJ10551; C<sub>178</sub>H<sub>279</sub>N<sub>47</sub>O<sub>64</sub>S; expected mass [M+4H<sup>+</sup>]/4 = 1033.752) and 29g'-x (QX22712; C<sub>187</sub>H<sub>324</sub>N<sub>56</sub>O<sub>46</sub>S; expected mass [M+4H<sup>+</sup>]/4 = 1031.620 Da). Also shown are ESI-TOF MS data for (D) triazole-stapled disulfide-bound coiled-coil variant *(R,S)*-sd27e/29g'-x4x before (ZJ1056; C<sub>373</sub>H<sub>617</sub>N<sub>109</sub>O<sub>113</sub>S<sub>2</sub>; expected [M+8H<sup>+</sup>]/8 = 1062.950 Da) and (E,F) after exposure to reducing conditions (1M DTT) for at least 8h (C<sub>373</sub>H<sub>619</sub>N<sub>109</sub>O<sub>113</sub>S<sub>2</sub>; expected [M+8H<sup>+</sup>]/8 = 1063.202 Da after reduction of disulfide bond to free cysteine residues). Note that *(R,S)*-sd27e/29g'-x4x remains intact even after disulfide reduction due to the triazole staple.



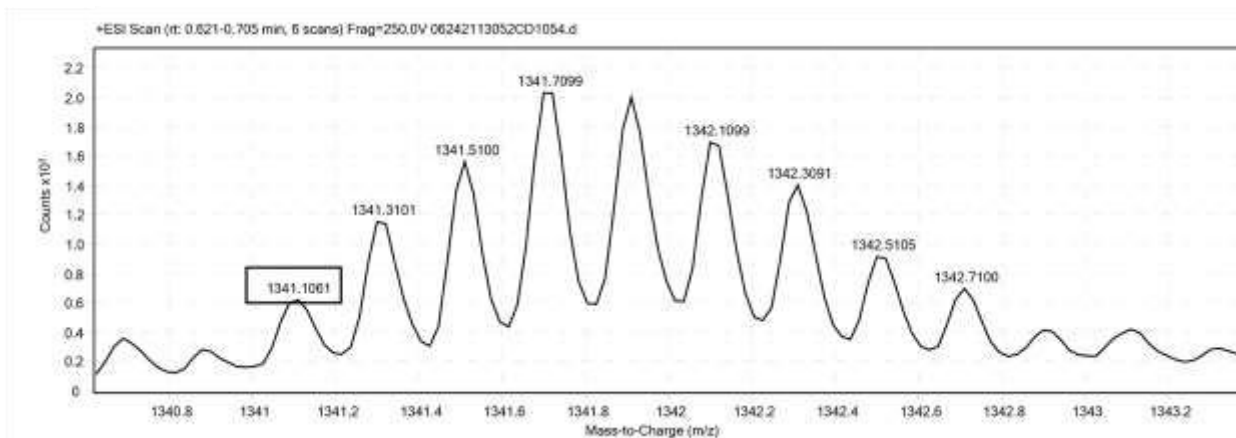

**Figure S82.** ESI-TOF MS spectrum for affibody **a** (CD1054). Expected  $[M+5H^+]/5 = 1341.102$  Da. Observed  $[M+5H^+]/5 = 1341.106$  Da.

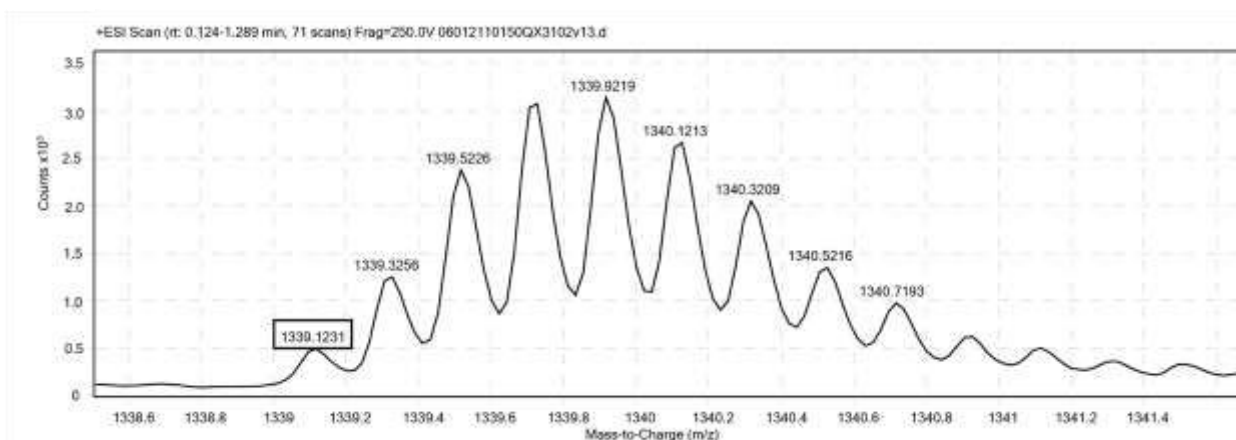

**Figure S83.** ESI-TOF MS spectrum for affibody variant **a8/42-xx** (QX3102). Expected  $[M+5H^+]/5 = 1339.102$  Da. Observed  $[M+5H^+]/5 = 1339.123$  Da.

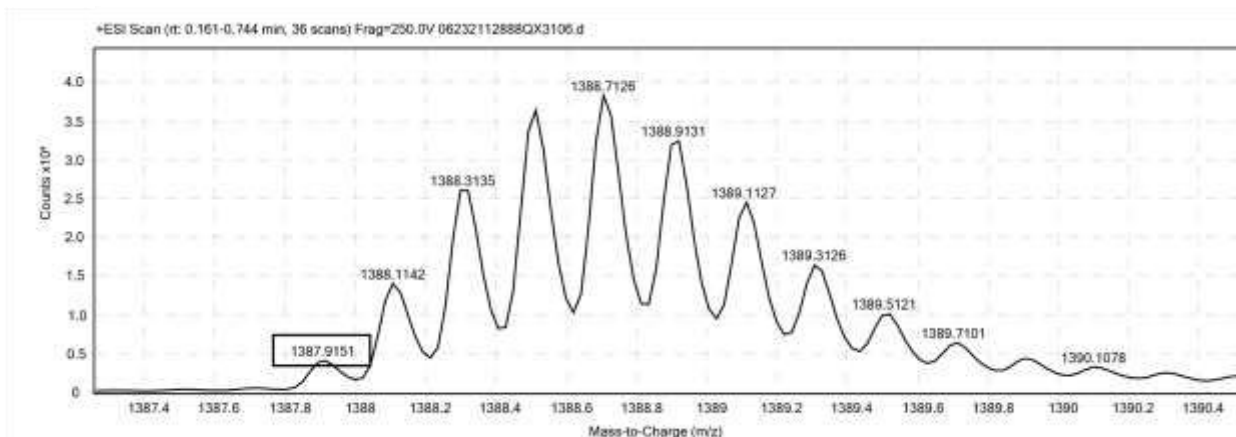

**Figure S84.** ESI-TOF MS spectrum for affibody variant **sa8/42-x4x** (QX3106). Expected  $[M+5H^+]/5 = 1387.927$  Da. Observed  $[M+5H^+]/5 = 1387.915$  Da.

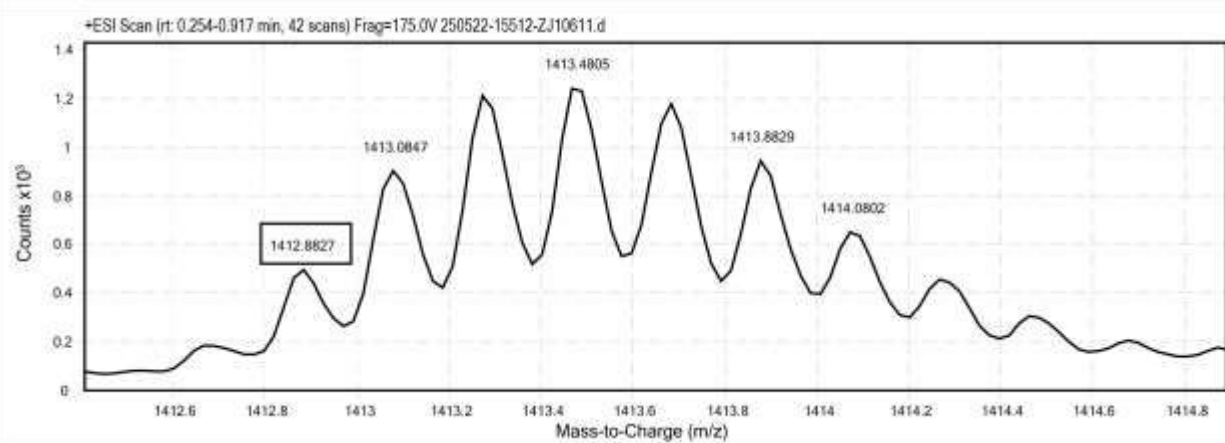

**Figure S85.** ESI-TOF MS spectrum for fluorescent affibody variant **fa** (ZJ10611). Expected  $[M+5H^+]/5 = 1412.914$  Da. Observed  $[M+5H^+]/5 = 1412.883$  Da.

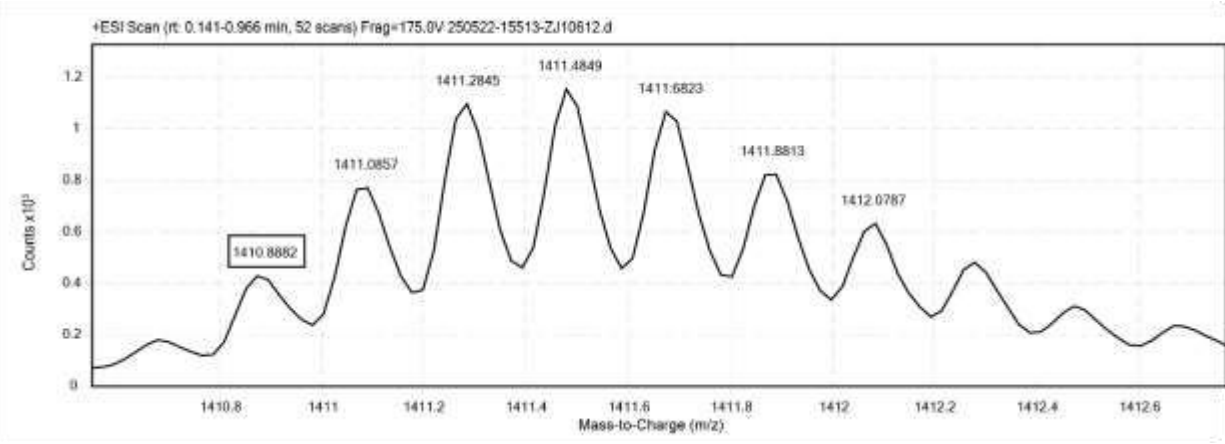

**Figure S86.** ESI-TOF MS spectrum for fluorescent affibody variant **fa8/42-xx** (ZJ10612). Expected  $[M+5H^+]/5 = 1410.913$  Da. Observed  $[M+5H^+]/5 = 1410.888$  Da.

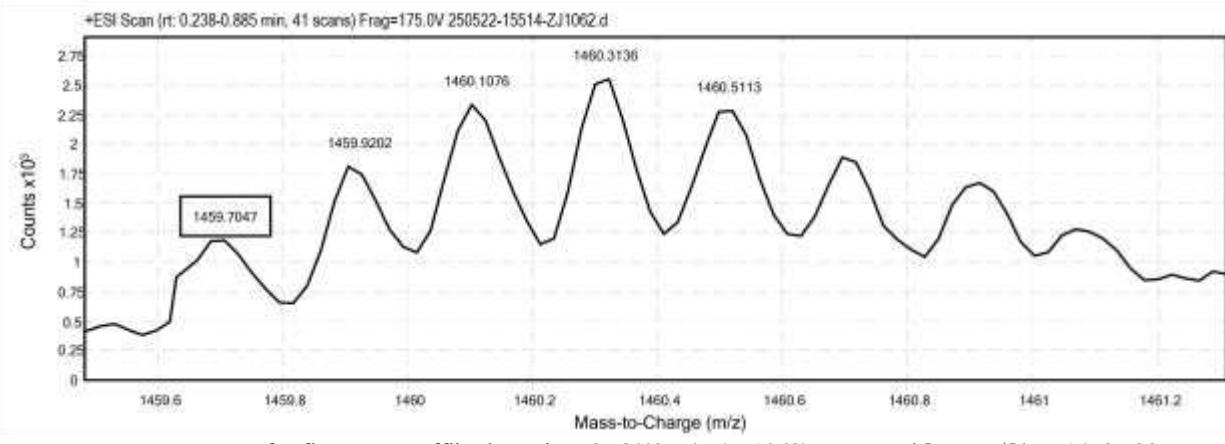

**Figure S87.** ESI-TOF MS spectrum for fluorescent affibody variant **fsa8/42-x4x** (ZJ1062). Expected  $[M+5H^+]/5 = 1459.738$  Da. Observed  $[M+5H^+]/5 = 1459.705$  Da.

**4. Analytical HPLC data**

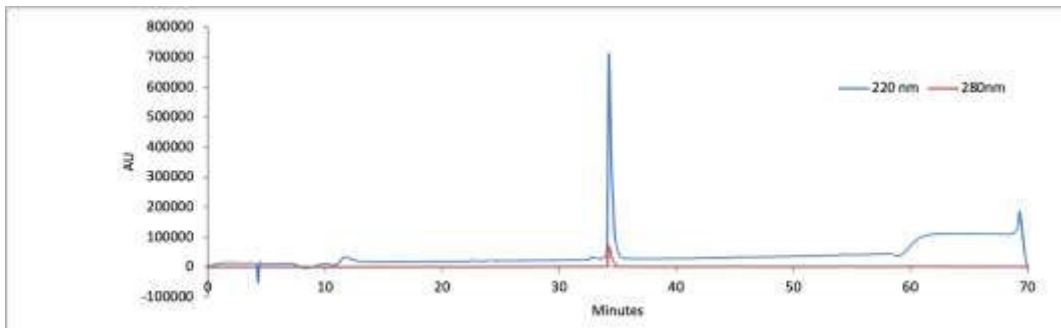

**Figure S88.** Analytical HPLC Data for variant **d20e/22g'-z4x** (ZJ10511). Protein solution was injected onto a C18 analytical column and eluted using a linear gradient of 10-60% B (A = H<sub>2</sub>O, 0.1% TFA; B = MeCN, 0.1% TFA) over 50 minutes, followed by a 10-minute rinse (95% B), and a 10-minute column re-equilibration.

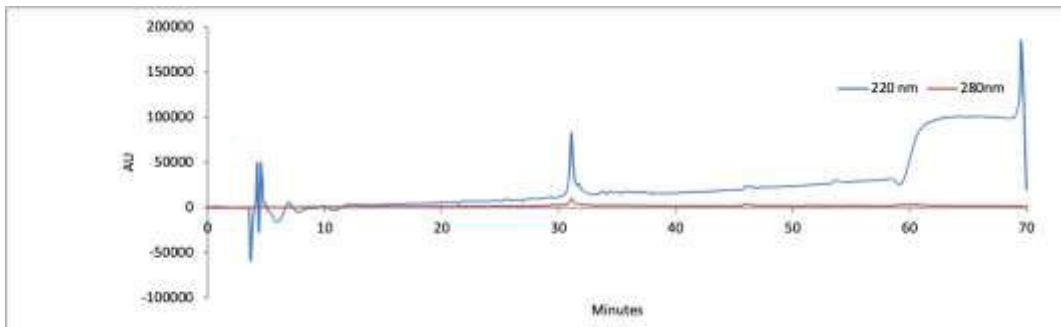

**Figure S89.** Analytical HPLC Data for variant **sd20e/22g'-z4x** (ZJ10511s). Protein solution was injected onto a C18 analytical column and eluted using a linear gradient of 10-60% B (A = H<sub>2</sub>O, 0.1% TFA; B = MeCN, 0.1% TFA) over 50 minutes, followed by a 10-minute rinse (95% B), and a 10-minute column re-equilibration.

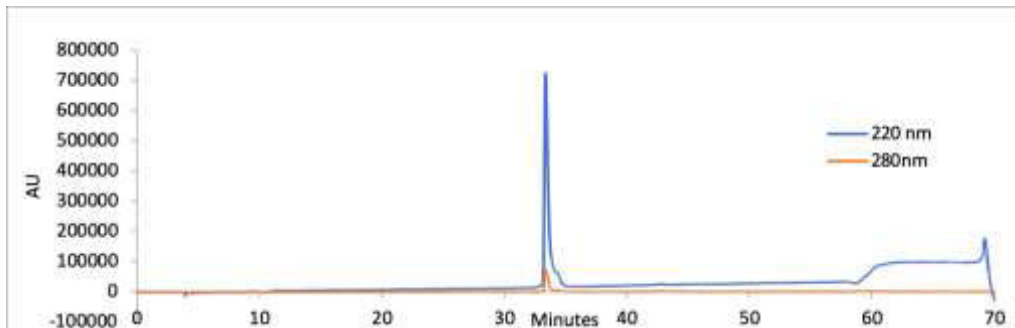

**Figure S90.** Analytical HPLC Data for variant **d27e/29g'-xx** (QX2271). Protein solution was injected onto a C18 analytical column and eluted using a linear gradient of 10-60% B (A = H<sub>2</sub>O, 0.1% TFA; B = MeCN, 0.1% TFA) over 50 minutes, followed by a 10-minute rinse (95% B), and a 10-minute column re-equilibration.

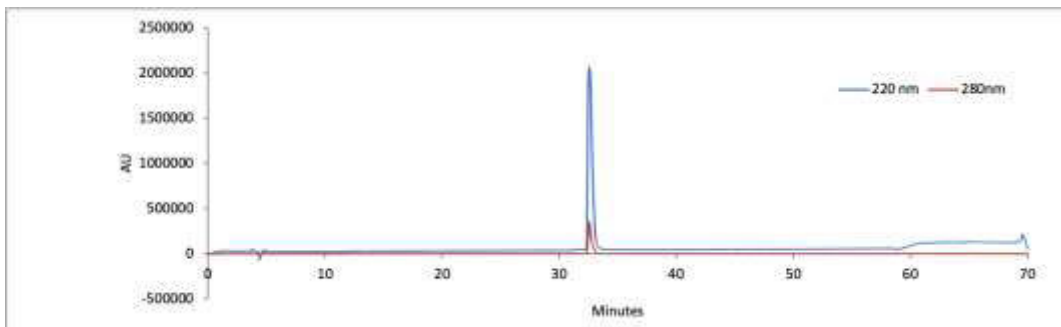

**Figure S91.** Analytical HPLC Data for variant **d13e/15g'-z4x** (QX31171). Protein solution was injected onto a C18 analytical column and eluted using a linear gradient of 10-60% B (A = H<sub>2</sub>O, 0.1% TFA; B = MeCN, 0.1% TFA) over 50 minutes, followed by a 10-minute rinse (95% B), and a 10-minute column re-equilibration.

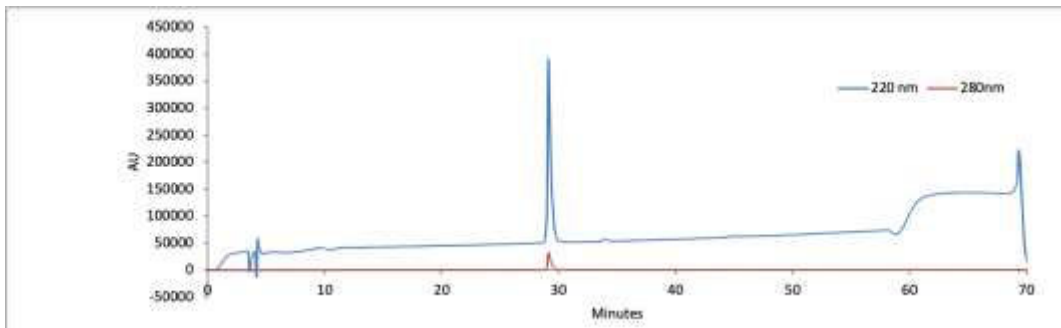

**Figure S852.** Analytical HPLC Data for variant **sd13e/15g'-z4x** (QX31171s). Protein solution was injected onto a C18 analytical column and eluted using a linear gradient of 10-60% B (A = H<sub>2</sub>O, 0.1% TFA; B = MeCN, 0.1% TFA) over 50 minutes, followed by a 10-minute rinse (95% B), and a 10-minute column re-equilibration.

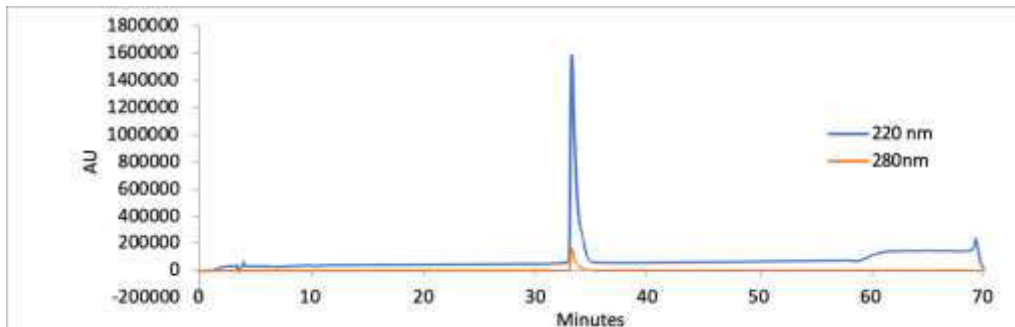

**Figure S93.** Analytical HPLC Data for variant **d6e/8g'-z4x** (QX2292). Protein solution was injected onto a C18 analytical column and eluted using a linear gradient of 10-60% B (A = H<sub>2</sub>O, 0.1% TFA; B = MeCN, 0.1% TFA) over 50 minutes, followed by a 10-minute rinse (95% B), and a 10-minute column re-equilibration.

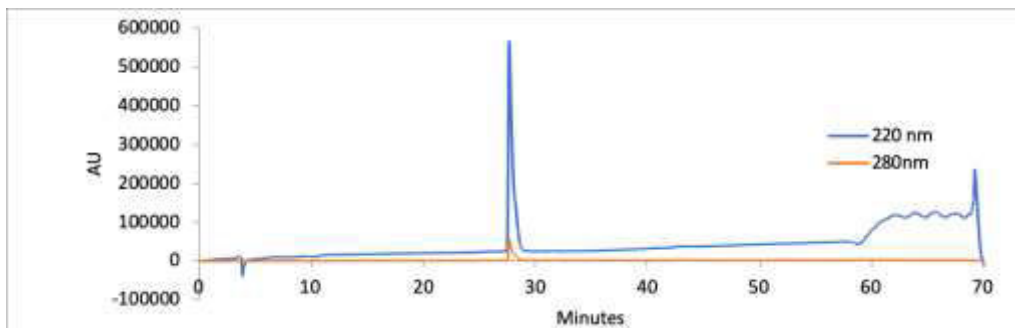

**Figure S94.** Analytical HPLC Data for variant **sd6e/8g'-z4x** (QX2292s). Protein solution was injected onto a C18 analytical column and eluted using a linear gradient of 10-60% B (A = H<sub>2</sub>O, 0.1% TFA; B = MeCN, 0.1% TFA) over 50 minutes, followed by a 10-minute rinse (95% B), and a 10-minute column re-equilibration.

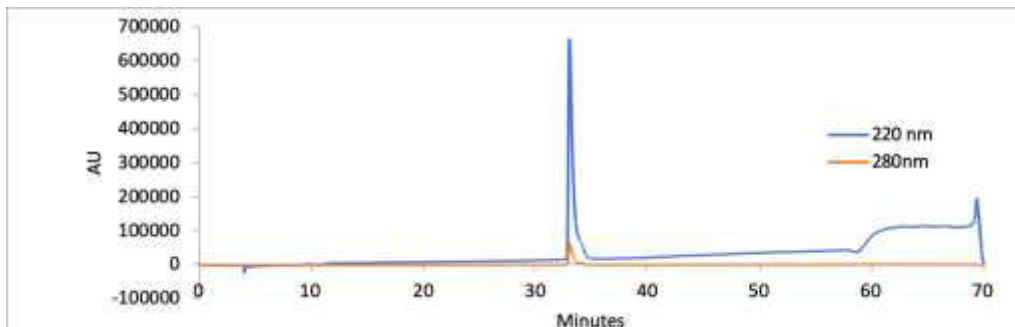

**Figure S95.** Analytical HPLC Data for variant **d27e/22g'-z4x** (QX2294). Protein solution was injected onto a C18 analytical column and eluted using a linear gradient of 10-60% B (A = H<sub>2</sub>O, 0.1% TFA; B = MeCN, 0.1% TFA) over 50 minutes, followed by a 10-minute rinse (95% B), and a 10-minute column re-equilibration.

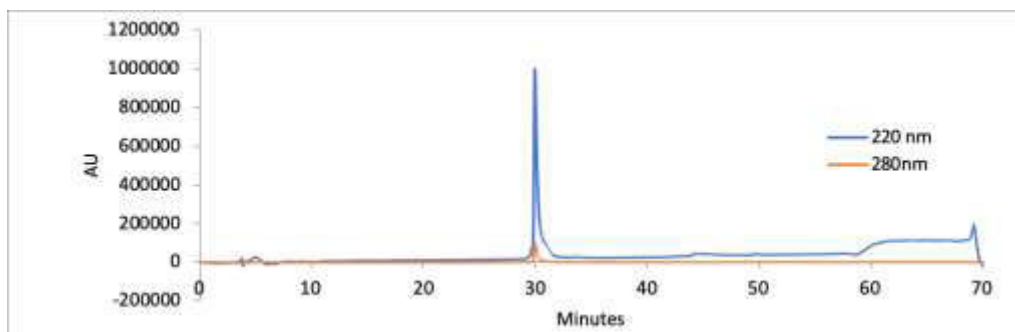

**Figure S96.** Analytical HPLC Data for variant **sd27e/22g'-z4x** (QX2294s). Protein solution was injected onto a C18 analytical column and eluted using a linear gradient of 10-60% B (A = H<sub>2</sub>O, 0.1% TFA; B = MeCN, 0.1% TFA) over 50 minutes, followed by a 10-minute rinse (95% B), and a 10-minute column re-equilibration.

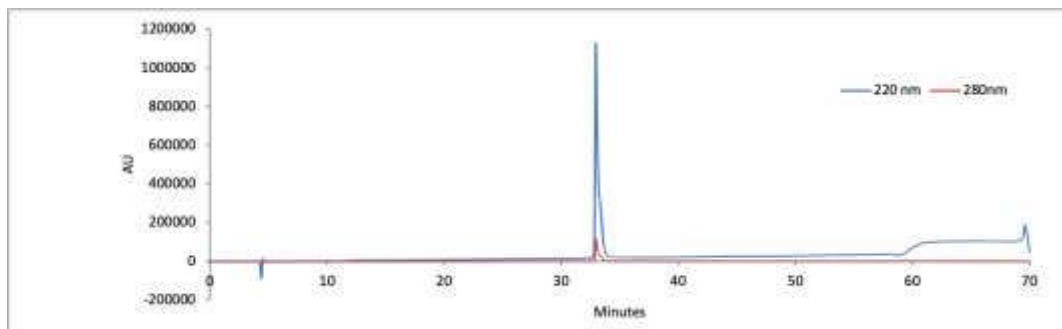

**Figure S97.** Analytical HPLC Data for variant **d6e/1g'-z4x** (QX31172). Protein solution was injected onto a C18 analytical column and eluted using a linear gradient of 10-60% B (A = H<sub>2</sub>O, 0.1% TFA; B = MeCN, 0.1% TFA) over 50 minutes, followed by a 10-minute rinse (95% B), and a 10-minute column re-equilibration.

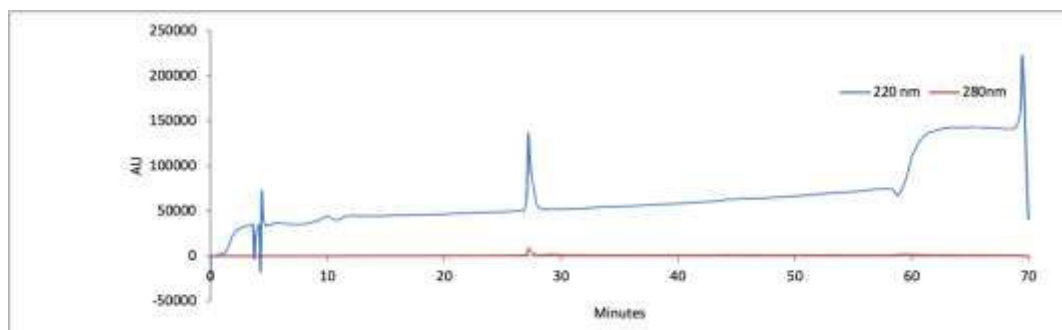

**Figure S98.** Analytical HPLC Data for variant **sd6e/1g'-z4x** (QX31172s). Protein solution was injected onto a C18 analytical column and eluted using a linear gradient of 10-60% B (A = H<sub>2</sub>O, 0.1% TFA; B = MeCN, 0.1% TFA) over 50 minutes, followed by a 10-minute rinse (95% B), and a 10-minute column re-equilibration.

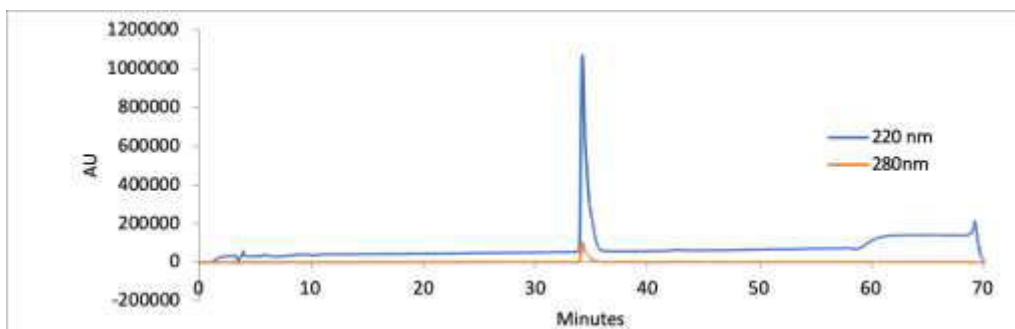

**Figure S99.** Analytical HPLC Data for variant **d27e/29g'-z2x** (QX2289). Protein solution was injected onto a C18 analytical column and eluted using a linear gradient of 10-60% B (A = H<sub>2</sub>O, 0.1% TFA; B = MeCN, 0.1% TFA) over 50 minutes, followed by a 10-minute rinse (95% B), and a 10-minute column re-equilibration.

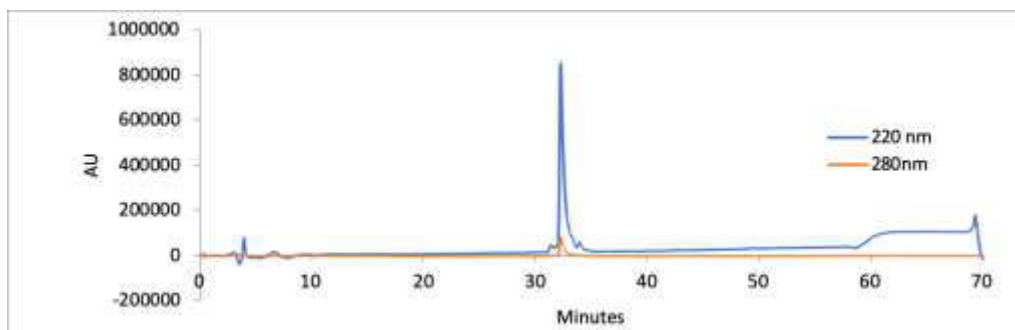

**Figure S100.** Analytical HPLC Data for variant **sd27e/29g'-z2x** (QX2289s). Protein solution was injected onto a C18 analytical column and eluted using a linear gradient of 10-60% B (A = H<sub>2</sub>O, 0.1% TFA; B = MeCN, 0.1% TFA) over 50 minutes, followed by a 10-minute rinse (95% B), and a 10-minute column re-equilibration.

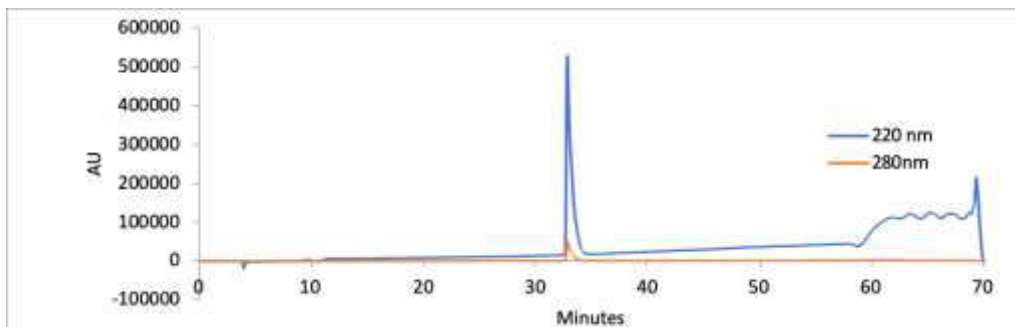

**Figure S101.** Analytical HPLC Data for variant **d27e/22g'-z2x** (QX2293). Protein solution was injected onto a C18 analytical column and eluted using a linear gradient of 10-60% B (A = H<sub>2</sub>O, 0.1% TFA; B = MeCN, 0.1% TFA) over 50 minutes, followed by a 10-minute rinse (95% B), and a 10-minute column re-equilibration.

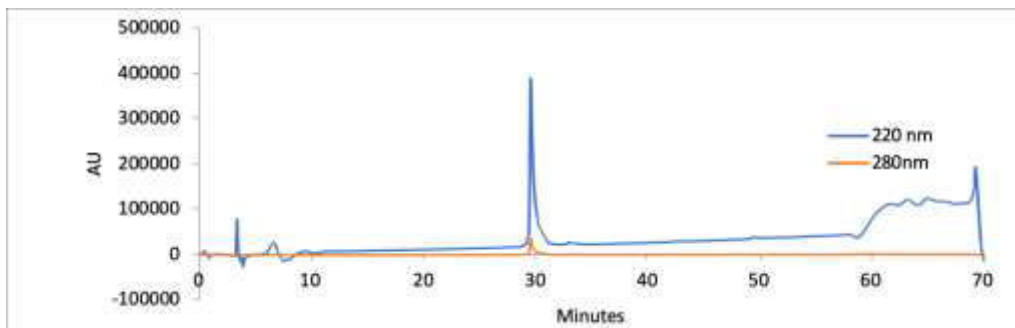

**Figure S102.** Analytical HPLC Data for variant **sd27e/22g'-z2x** (QX2293s). Protein solution was injected onto a C18 analytical column and eluted using a linear gradient of 10-60% B (A = H<sub>2</sub>O, 0.1% TFA; B = MeCN, 0.1% TFA) over 50 minutes, followed by a 10-minute rinse (95% B), and a 10-minute column re-equilibration.

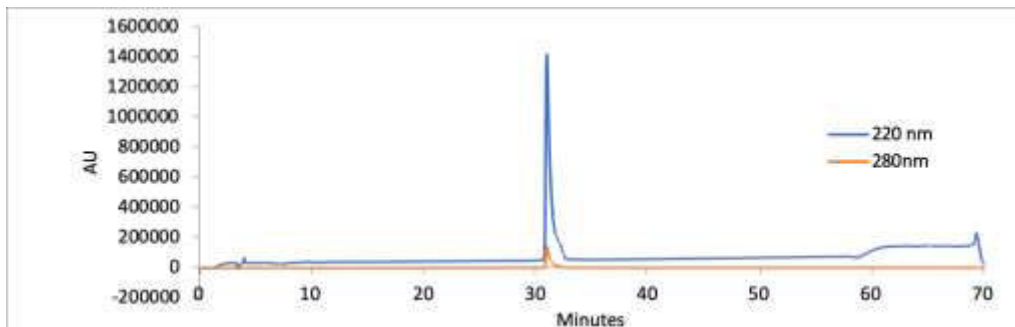

**Figure S103.** Analytical HPLC Data for variant **d24b/25c'-z4x** (QX2291). Protein solution was injected onto a C18 analytical column and eluted using a linear gradient of 10-60% B (A = H<sub>2</sub>O, 0.1% TFA; B = MeCN, 0.1% TFA) over 50 minutes, followed by a 10-minute rinse (95% B), and a 10-minute column re-equilibration.

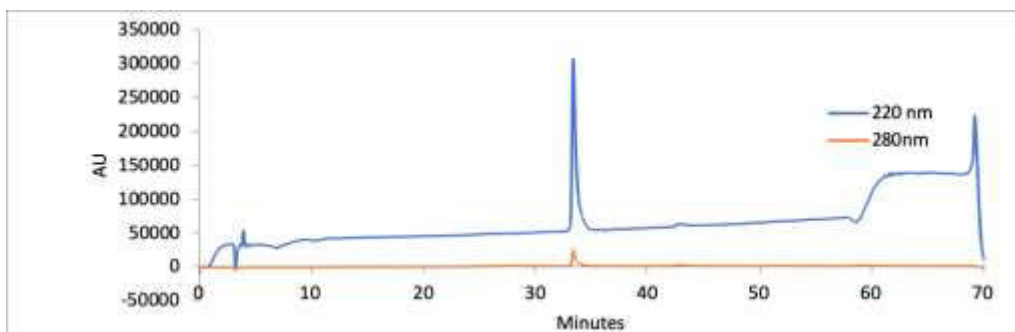

**Figure S104.** Analytical HPLC Data for variant **sd24b/25c'-z4x** (QX2291s). Protein solution was injected onto a C18 analytical column and eluted using a linear gradient of 10-60% B (A = H<sub>2</sub>O, 0.1% TFA; B = MeCN, 0.1% TFA) over 50 minutes, followed by a 10-minute rinse (95% B), and a 10-minute column re-equilibration.

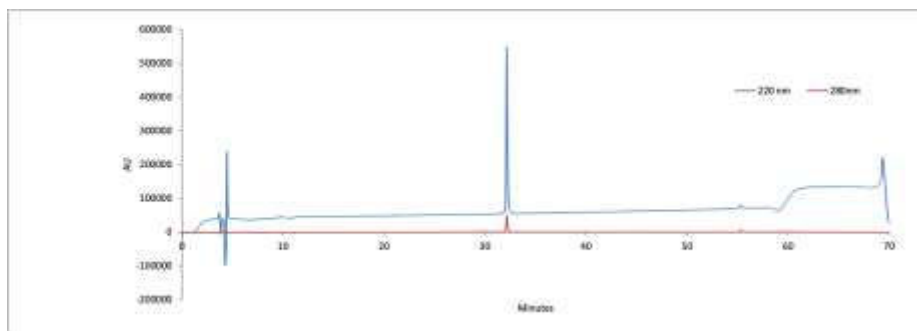

**Figure S105.** Analytical HPLC Data for variant **d24b/25c'-z4y4** (QX3096). Protein solution was injected onto a C18 analytical column and eluted using a linear gradient of 10-60% B (A = H<sub>2</sub>O, 0.1% TFA; B = MeCN, 0.1% TFA) over 50 minutes, followed by a 10-minute rinse (95% B), and a 10-minute column re-equilibration.

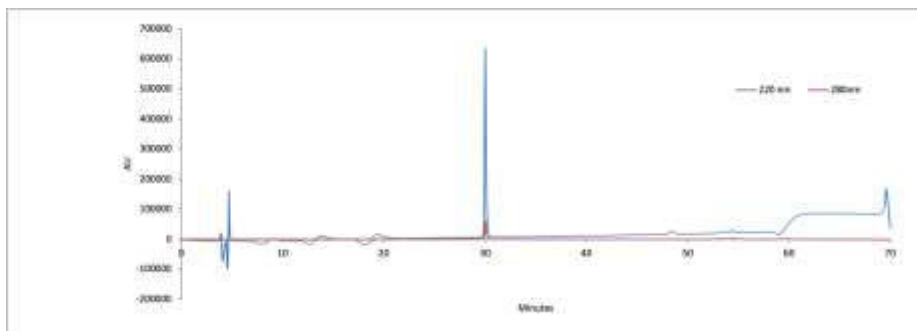

**Figure S106.** Analytical HPLC Data for variant **sd24b/25c'-z4y4** (QX3096s). Protein solution was injected onto a C18 analytical column and eluted using a linear gradient of 10-60% B (A = H<sub>2</sub>O, 0.1% TFA; B = MeCN, 0.1% TFA) over 50 minutes, followed by a 10-minute rinse (95% B), and a 10-minute column re-equilibration.

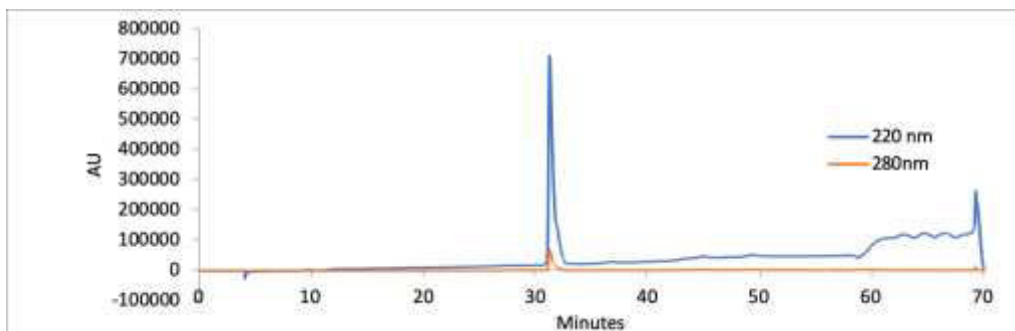

**Figure S107.** Analytical HPLC Data for variant **d7f/10b'-z4x** (QX2295). Protein solution was injected onto a C18 analytical column and eluted using a linear gradient of 10-60% B (A = H<sub>2</sub>O, 0.1% TFA; B = MeCN, 0.1% TFA) over 50 minutes, followed by a 10-minute rinse (95% B), and a 10-minute column re-equilibration.

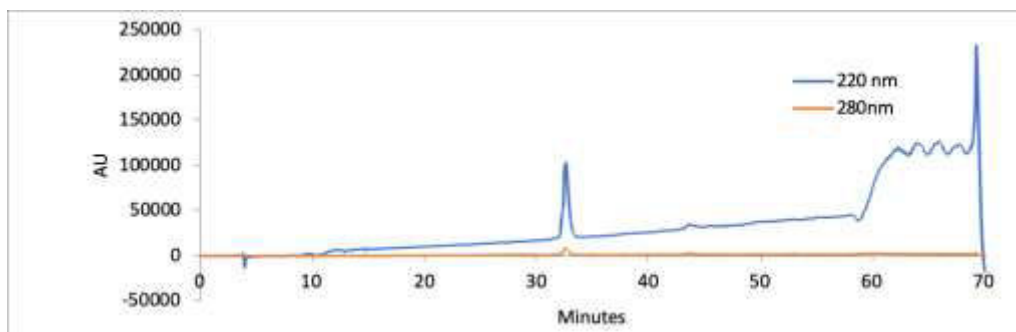

**Figure S108.** Analytical HPLC Data for variant **sd7f10b'-z4x** (QX2295). Protein solution was injected onto a C18 analytical column and eluted using a linear gradient of 10-60% B (A = H<sub>2</sub>O, 0.1% TFA; B = MeCN, 0.1% TFA) over 50 minutes, followed by a 10-minute rinse (95% B), and a 10-minute column re-equilibration.

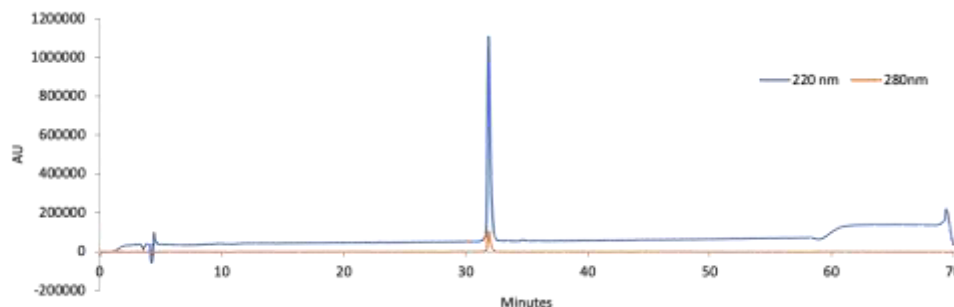

**Figure S109.** Analytical HPLC Data for variant **d7f10b'-z4y4** (QX3101). Protein solution was injected onto a C18 analytical column and eluted using a linear gradient of 10-60% B (A = H<sub>2</sub>O, 0.1% TFA; B = MeCN, 0.1% TFA) over 50 minutes, followed by a 10-minute rinse (95% B), and a 10-minute column re-equilibration.

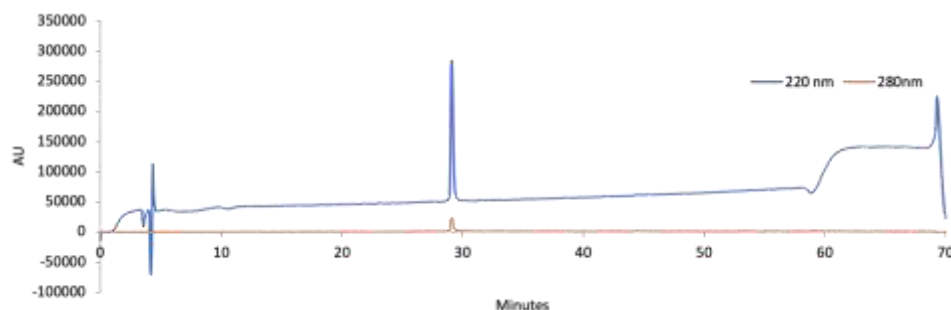

**Figure S110.** Analytical HPLC Data for variant **sd7f10b'-z4y4** (QX3101s). Protein solution was injected onto a C18 analytical column and eluted using a linear gradient of 10-60% B (A = H<sub>2</sub>O, 0.1% TFA; B = MeCN, 0.1% TFA) over 50 minutes, followed by a 10-minute rinse (95% B), and a 10-minute column re-equilibration.

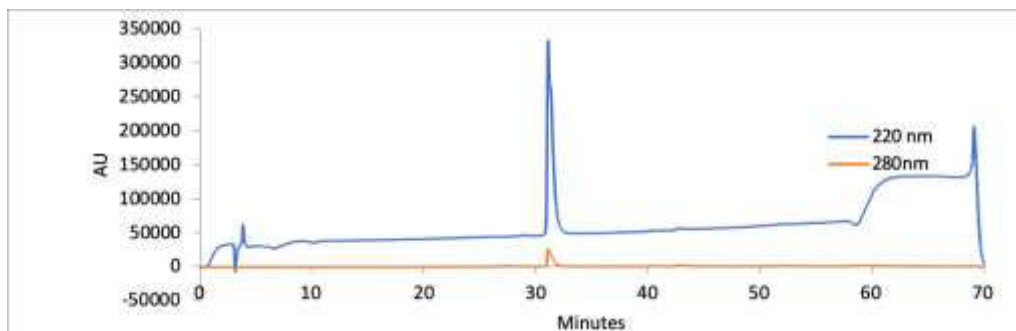

**Figure S111.** Analytical HPLC Data for coiled-coil variant **sd27e/29g'-x4x** (QX2283). Protein solution was injected onto a C18 analytical column and eluted using a linear gradient of 10-60% B (A = H<sub>2</sub>O, 0.1% TFA; B = MeCN, 0.1% TFA) over 50 minutes, followed by a 10-minute rinse (95% B), and a 10-minute column re-equilibration.



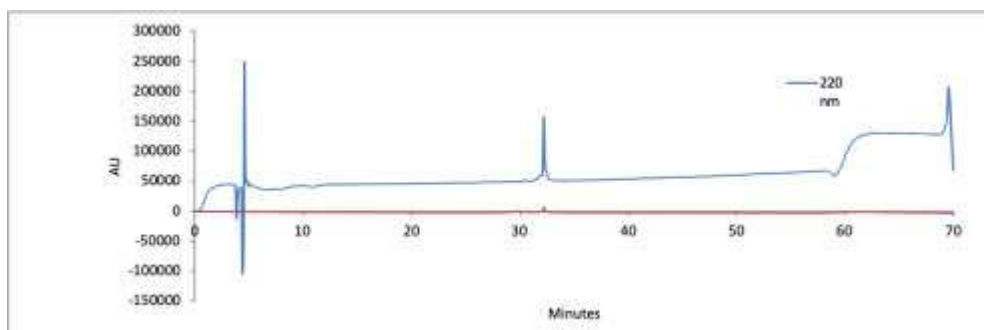

**Figure S112.** Analytical HPLC Data for variant **sd27e/29e'-x4px** (QX3079). Protein solution was injected onto a C18 analytical column and eluted using a linear gradient of 10-60% B (A = H<sub>2</sub>O, 0.1% TFA; B = MeCN, 0.1% TFA) over 50 minutes, followed by a 10-minute rinse (95% B), and a 10-minute column re-equilibration.

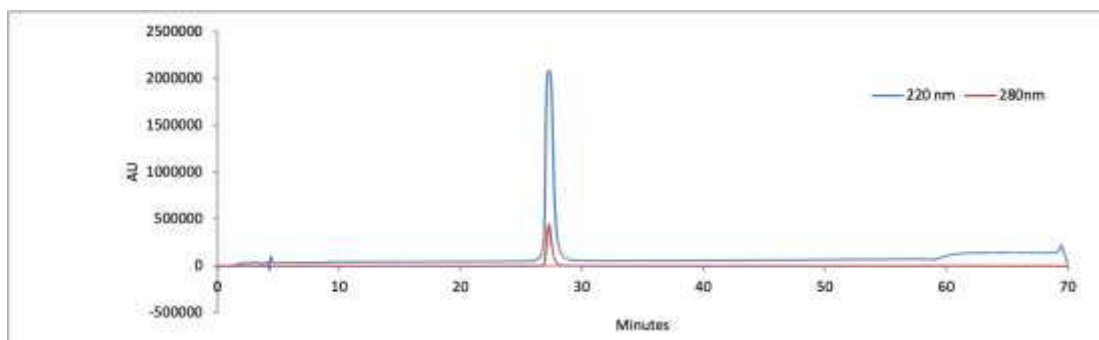

**Figure S113.** Analytical HPLC Data for native affibody **a** (CD1054). Protein solution was injected onto a C18 analytical column and eluted using a linear gradient of 10-60% B (A = H<sub>2</sub>O, 0.1% TFA; B = MeCN, 0.1% TFA) over 50 minutes, followed by a 10-minute rinse (95% B), and a 10-minute column re-equilibration.

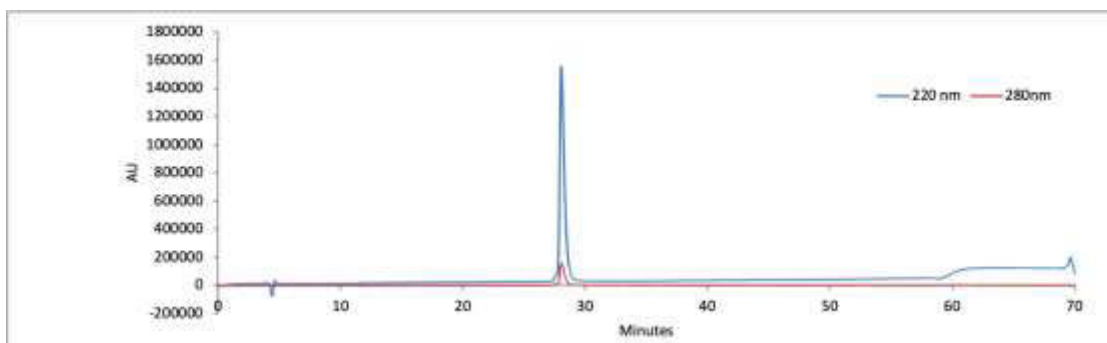

**Figure S114.** Analytical HPLC Data for affibody variant **a8/42-xx** (QX3102). Protein solution was injected onto a C18 analytical column and eluted using a linear gradient of 10-60% B (A = H<sub>2</sub>O, 0.1% TFA; B = MeCN, 0.1% TFA) over 50 minutes, followed by a 10-minute rinse (95% B), and a 10-minute column re-equilibration.

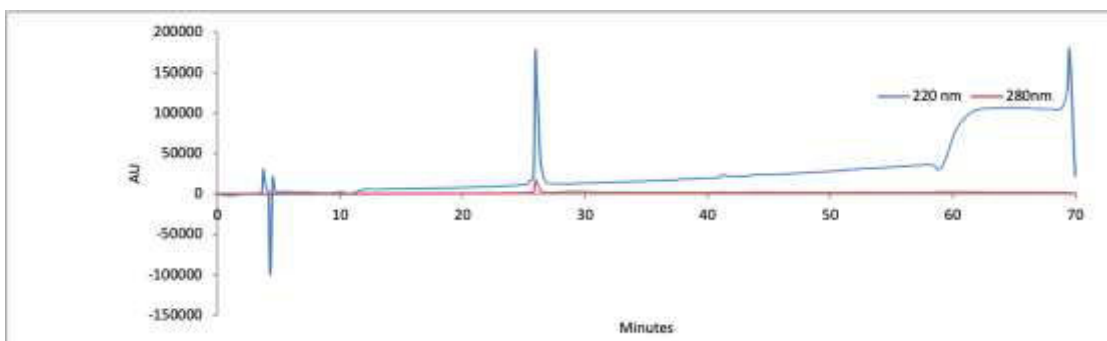

**Figure S115.** Analytical HPLC Data for stapled affibody variant **sa8/42-x4x** (QX3106). Protein solution was injected onto a C18 analytical column and eluted using a linear gradient of 10-60% B (A = H<sub>2</sub>O, 0.1% TFA; B = MeCN, 0.1% TFA) over 50 minutes, followed by a 10-minute rinse (95% B), and a 10-minute column re-equilibration.

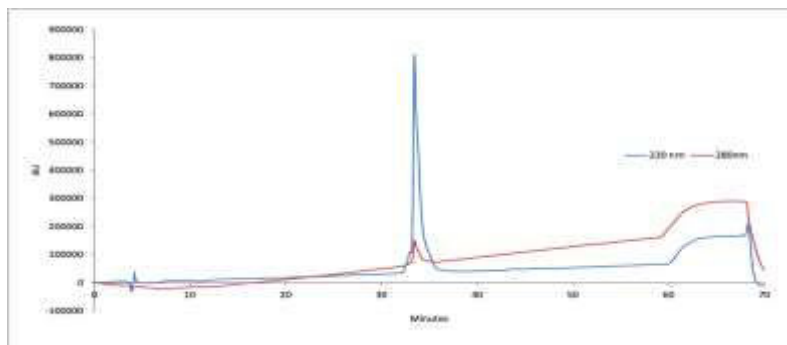

**Figure S116.** Analytical HPLC Data for fluorescent affibody variant **fa** (ZJ10611). Protein solution was injected onto a C18 analytical column and eluted using a linear gradient of 10-60% B (A = H<sub>2</sub>O, 0.1% TFA; B = MeCN, 0.1% TFA) over 50 minutes, followed by a 10-minute rinse (95% B), and a 10-minute column re-equilibration.

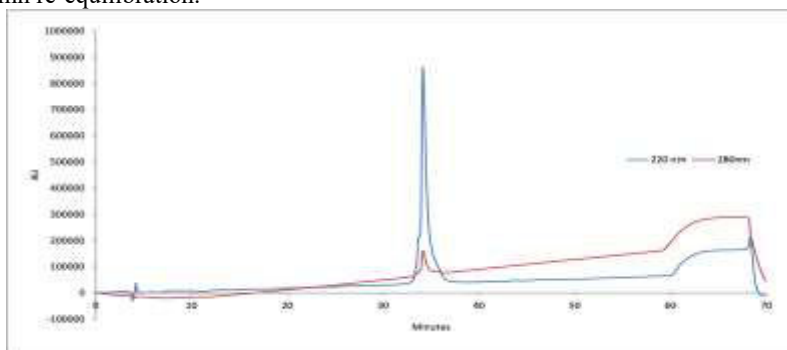

**Figure S117.** Analytical HPLC Data for fluorescent affibody variant **fa8/42-xx** (ZJ10612). Protein solution was injected onto a C18 analytical column and eluted using a linear gradient of 10-60% B (A = H<sub>2</sub>O, 0.1% TFA; B = MeCN, 0.1% TFA) over 50 minutes, followed by a 10-minute rinse (95% B), and a 10-minute column re-equilibration.

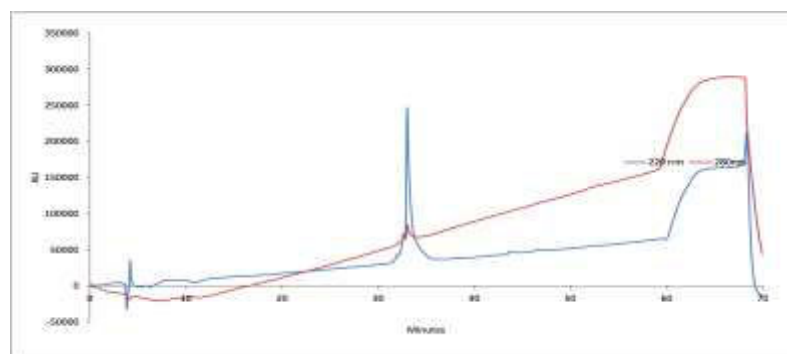

**Figure S118.** Analytical HPLC Data for fluorescent native affibody variant **fa8/42-x4x** (ZJ1062). Protein solution was injected onto a C18 analytical column and eluted using a linear gradient of 10-60% B (A = H<sub>2</sub>O, 0.1% TFA; B = MeCN, 0.1% TFA) over 50 minutes, followed by a 10-minute rinse (95% B), and a 10-minute column re-equilibration.

## 5. Global Fitting of Variable Temperature CD Data

The conformational stability of stapled variants and their non-stapled counterparts was assessed by variable-temperature circular dichroism spectropolarimetry. Data from three replicate variable temperature CD experiments were each fit globally to a model for a two-state thermally induced unfolding transition using the program Mathematica (Wolfram Research). We used a model based on two-state monomer folding/unfolding equilibrium for stapled coiled-coil variants **sd20e/22g'-z4x**, **sd13e/15g'-z4x**, **sd6e/8g'-z4x**, **sd27e/22g'-z4x**, **sd6e/1g'-z4x**, **sd27e/29g'-z2x**, **sd27e/22g'-z2x**, **sd24b/25c'-z4x**, **sd24b/25c'-z4y4**, **sd7f/10b'-z4x**, **sd7f/10b'-z4y4**, **sd27e/29g'-x4x**, **sd27e/29g'-x4px**, and **(R,S)-sd27e/29g'-x4x**; for their non-stapled counterparts variants **d20e/22g'-z4x**, **d13e/15g'-z4x**, **d6e/8g'-z4x**, **d27e/22g'-z4x**, **d6e/1g'-z4x**, **d27e/29g'-z2x**, **d27e/22g'-z2x**, **d24b/25c'-z4x**, **d24b/25c'-z4y4**, **d7f/10b'-z4x**, **d7f/10b'-z4y4**, **d27e/29g'-xx**, and **(R,S)-d27e/29g'-xx**; for stapled HER2 affibody **sa8/42-xx**; for its non-stapled counterpart **a8/42-x4x**; and for native HER2 affibody **a**. This model is described in equation S1:

$$[\theta] = \frac{[K \cdot (a_n + b_n \cdot T) + (c_n + d_n \cdot T)]}{1 + K}, \quad (S1)$$

where T is temperature in Kelvin,  $a_n$  is the y-intercept and  $b_n$  is the slope of the pre-transition baseline for melt  $n$  ( $a_1$  and  $b_1$  for replicate 1,  $a_2$  and  $b_2$  for replicate 2,  $a_3$  and  $b_3$  for replicate 3, etc.);  $c_n$  is the y-intercept and  $d_n$  is the slope of the post-transition baseline for replicate  $n$  ( $c_1$  and  $d_1$  for replicate 1,  $c_2$  and  $d_2$  for replicate 2,  $c_3$  and  $d_3$  for replicate 3, etc.); and K is the temperature-dependent folding equilibrium constant. K is related to the temperature-dependent free energy of folding  $\Delta G$  according to the following equation:

$$K = \exp\left[-\frac{\Delta G}{RT}\right], \quad (S2)$$

where R is the universal gas constant (0.0019872 kcal/mol/K).  $\Delta G$  is a function of temperature, as shown in the following equation:

$$\Delta G = \frac{\Delta H_0 \cdot (T_m - T)}{T_m} + \Delta C_p \cdot (T - T_m - T \cdot \ln\left[\frac{T}{T_m}\right]), \quad (S3)$$

where  $T_m$  is the midpoint of the unfolding transition and the temperature at which  $\Delta G_f = 0$ ;  $\Delta H_0$  is the change in enthalpy upon folding at  $T = T_m$ ; and  $\Delta C_p$  is the change in heat capacity upon folding. In some cases, we found that some fit parameters had sufficiently high standard errors as to render them indistinguishable from zero and therefore not essential to the fit (as judged by their p-values). When this occurred, we repeated the fitting process without the non-essential parameters. We used the fit parameters for each variant to calculate the  $\Delta G$  values given in the main text; we calculated the uncertainty for each  $\Delta G$  value by propagation of error using the standard errors of the fit parameters.

Molar ellipticity data at 222 nm ( $[\theta]_{222}$ ), melting temperatures ( $T_m$ ), and folding free energies  $\Delta G$  for variants **d27e/29g'-z4x** and **sd27e/29g'-z4x**; **d27e/22g'-z4x** and **sd27e/22g'-z4x**; **d24b/25c'-z4x** and **sd24b/25c'-z4x**; **d20e/22g'-z4x** and **sd20e/22g'-z4x**; **d13e/15g'-z4x** and **sd13e/15g'-z4x**; **d6e/8g'-z4x** and **sd6e/8g'-z4x**; **d6e/1g'-z4x** and **sd6e/1g'-z4x**; **d27e/29g'-z2x** and **sd27e/29g'-z2x**; **d27e/22g'-z2x** and **sd27e/22g'-z2x**; **d24b/25c'-z4y4** and **sd24b/25c'-z4y4**; **d7f/10b'-z4x** and **sd7f/10b'-z4x**; **d7f/10b'-z4y4** and **sd7f/10b'-z4y4**; **d27e/29g'-xx**, **sd27e/29g'-x4x**, and **sd27e/29g'-x4px**; and HER2 affibody variants **a**, **a8/42-xx** and **sa8/42-x4x** are given in Table S2.  $[\theta]_{222}$  is a well-known indicator of  $\alpha$ -helical secondary structure, whereas  $T_m$  values are indicators of tertiary/quaternary structural stability. Values of the ratio  $[\theta]_{222}/[\theta]_{208}$  near 1.1 are also considered diagnostic of coiled-coil tertiary/quaternary structures. However, we were not able to measure  $[\theta]_{208}$  due to the excessively high dynode values we observed at wavelengths less than 210 nm in solutions of these variants in 20 mM phosphate buffer (pH 7) + 4 M guanidinium chloride (which was necessary to observe complete or nearly complete thermal unfolding transitions). Therefore, our assessment of coiled-coil tertiary structural stability must rely on  $T_m$  values alone.

$[\theta]_{222}$  values for these variants are consistent with  $\alpha$ -helical secondary structure and  $T_m$  values are consistent with coiled-coil tertiary structure. However, the magnitude of  $[\theta]_{222}$  varies widely from variant to variant and is not well correlated with  $T_m$  (Figure S113). Increases in  $T_m$  associated with PEG stapling are sometimes associated with increases in  $[\theta]_{222}$  (compare variants **d27e/29g'-z4x** vs. **sd27e/29g'-z4x**; **d20e/22g'-z4x** vs. **sd20e/22g'-z4x**; **d13e/15g'-z4x** vs. **sd13e/15g'-z4x**; **d27e/22g'-z4x** vs. **sd27e/22g'-z4x**; **d6e/1g'-z4x** vs. **sd6e/1g'-z4x**; **d7f/10b'-z4y4** vs. **sd7f/10b'-z4y4**; **d27e/22g'-z4x** vs. **sd27e/22g'-z4x**; and **d27e/29g'-xx** vs. **sd27e/29g'-x4x**), but not always (compare variants **d6e/8g'-z4x** vs. **sd6e/8g'-z4x**; **d7f/10b'-z4x** vs. **sd7f/10b'-z4x**; **sd27e/29g'-x4px** vs. **sd27e/29g'-x4x**; and **a8/42-xx** vs. **sa8/42-x4x**). This observation is interesting because it is generally accepted that  $\alpha$ -helical secondary structure forms concomitantly with coiled-coil association: that is, individual subunits are only  $\alpha$ -helical within the coiled-coil assembly, not on their own. It is possible that the covalent linkages between helices in the disulfide-bound coiled-coil variants and their stapled counterparts attenuate the connection between secondary and tertiary structural stability. However, we previously<sup>3</sup> observed a similar lack of correlation between  $[\theta]_{222}$  and  $T_m$  values in a study of non-stapled non-disulfide-bound trimeric  $\alpha$ -helical coiled coils. Despite this anomaly, crystallography confirmed that these previously characterized variants adopted their intended trimeric coiled-coil quaternary structures. Therefore, we believe that the lack of correlation we observed here between  $[\theta]_{222}$  and  $T_m$ , while interesting, does not substantially change the conclusions

described in the main text.

CD spectra and variable temperature CD data for each variant are shown in Figures S114–S143, along with the fit parameters  $\pm$  standard error. Standard parameter errors were used to estimate the uncertainty in the thermodynamic values given in the main text by propagation of error.

**Table S2.** Molar ellipticity, melting temperatures and folding free energies for non-stapled variants and their PEG-stapled counterparts.<sup>a</sup>

| Protein         | Distance between staple positions (Å) | Calculated Staple Length (Å) | [ $\theta$ ] <sub>222</sub> (deg cm <sup>2</sup> dmol <sup>-1</sup> x 10 <sup>3</sup> ) | T <sub>m</sub> (°C) | Impact of Stapling          |                             |                              |
|-----------------|---------------------------------------|------------------------------|-----------------------------------------------------------------------------------------|---------------------|-----------------------------|-----------------------------|------------------------------|
|                 |                                       |                              |                                                                                         |                     | $\Delta\Delta G$ (kcal/mol) | $\Delta\Delta H$ (kcal/mol) | $-\Delta\Delta S$ (kcal/mol) |
| d27e/29g'-z4x   |                                       |                              | -24.6                                                                                   | 41.1 ± 0.2          |                             |                             |                              |
| sd27e/29g'-z4x  | 9.2                                   | 18.5                         | -34.5                                                                                   | 48.2 ± 0.1          | -0.65 ± 0.02                | 1.3 ± 0.6                   | -1.9 ± 0.6                   |
| d20e/22g'-z4x   |                                       |                              | -24.0                                                                                   | 41.8 ± 0.2          |                             |                             |                              |
| sd20e/22g'-z4x  | 9.2                                   | 18.5                         | -31.3                                                                                   | 54.3 ± 0.1          | -1.09 ± 0.02                | 1.6 ± 0.6                   | -2.7 ± 0.6                   |
| d13e/15g'-z4x   |                                       |                              | -28.2                                                                                   | 42.4 ± 0.1          |                             |                             |                              |
| sd13e/15g'-z4x  | 9.7                                   | 18.5                         | -29.7                                                                                   | 57.7 ± 0.1          | -1.33 ± 0.02                | 2.1 ± 0.5                   | -3.4 ± 0.5                   |
| d6e/8g'-z4x     |                                       |                              | -31.6                                                                                   | 39.5 ± 0.2          |                             |                             |                              |
| sd6e/8g'-z4x    | 10.6                                  | 18.5                         | -18.2                                                                                   | 69.1 ± 0.1          | -2.53 ± 0.04                | -1.9 ± 0.6                  | -0.7 ± 0.6                   |
| d27e/22g'-z4x   |                                       |                              | -22.5                                                                                   | 43.2 ± 0.1          |                             |                             |                              |
| sd27e/22g'-z4x  | 6.3                                   | 18.5                         | -40.4                                                                                   | 63.6 ± 0.1          | -2.01 ± 0.02                | -2.7 ± 0.5                  | 0.6 ± 0.5                    |
| d6e/1g'-z4x     |                                       |                              | -24.7                                                                                   | 45.0 ± 0.1          |                             |                             |                              |
| sd6e/1g'-z4x    | 6.0                                   | 18.5                         | -27.6                                                                                   | 73.7 ± 0.2          | -2.30 ± 0.04                | 1.7 ± 0.6                   | -4.0 ± 0.6                   |
| d24b/25c'-z4x   |                                       |                              | -38.0                                                                                   | 43.4 ± 0.1          |                             |                             |                              |
| sd24b/25c'-z4x  | 14.3                                  | 18.5                         | -11.4                                                                                   | 33.0 ± 0.2          | 0.65 ± 0.02                 | 8.1 ± 0.5                   | -7.4 ± 0.5                   |
| d7f/10b'-z4x    |                                       |                              | -24.9                                                                                   | 42.6 ± 0.2          |                             |                             |                              |
| sd7f/10b'-z4x   | 15.6                                  | 18.5                         | -11.1                                                                                   | 51.4 ± 0.3          | -0.61 ± 0.03                | 8.8 ± 0.9                   | -9.4 ± 0.9                   |
| d24b/25c'-z4y4  |                                       |                              | -21.3                                                                                   | 46.5 ± 0.1          |                             |                             |                              |
| sd24b/25c'-z4y4 | 14.3                                  | 28.5                         | -16.5                                                                                   | 44.5 ± 0.2          | 0.17 ± 0.02                 | 0.8 ± 0.6                   | -0.6 ± 0.6                   |
| d7f/10b'-z4y4   |                                       |                              | -16.4                                                                                   | 43.7 ± 0.2          |                             |                             |                              |
| sd7f/10b'-z4y4  | 15.6                                  | 28.5                         | -30.2                                                                                   | 54.2 ± 0.2          | -0.68 ± 0.01                | 6.6 ± 0.6                   | -7.2 ± 0.6                   |
| d27e/29g'-z2x   |                                       |                              | -24.2                                                                                   | 38.8 ± 0.2          |                             |                             |                              |
| sd27e/29g'-z2x  | 9.2                                   | 8.1                          | -16.3                                                                                   | 33.7 ± 0.1          | 0.31 ± 0.01                 | 6.1 ± 0.4                   | -5.8 ± 0.4                   |
| d27e/22g'-z2x   |                                       |                              | -20.4                                                                                   | 43.4 ± 0.1          |                             |                             |                              |
| sd27e/22g'-z2x  | 6.3                                   | 8.1                          | -23.1                                                                                   | 64.9 ± 0.3          | -2.04 ± 0.03                | -0.5 ± 0.6                  | -1.5 ± 0.6                   |
| d27e/29g'-xx    |                                       |                              | -22.4                                                                                   | 39.8 ± 0.2          |                             |                             |                              |
| sd27e/29g'-x4x  | 9.2                                   | 19.3                         | -52.2                                                                                   | 52.9 ± 0.2          | -1.08 ± 0.03                | -2.0 ± 0.5                  | 0.9 ± 0.5                    |
| sd27e/29g'-x4px |                                       |                              | -28.1                                                                                   | 53.4 ± 0.1          | -1.21 ± 0.02                | -4.1 ± 0.5                  | 2.9 ± 0.5                    |
| affibody a      |                                       |                              | -7.0                                                                                    | 66.4 ± 0.2          |                             |                             |                              |
| a8/42-xx        | 7.4                                   | 19.3                         | -38.5                                                                                   | 60.9 ± 0.1          | 0.64 ± 0.02                 | -2.1 ± 1.1                  | 2.8 ± 1.1                    |
| sa8/42-x4x      |                                       |                              | -16.1                                                                                   | 76.1 ± 0.1          | -1.09 ± 0.03                | 3.5 ± 1.3                   | -4.6 ± 1.3                   |

<sup>a</sup>Distance between staple positions for each variant were calculated by measuring the distance between the centers of mass of the corresponding side chains in the crystal structure of the parent disulfide-bound coiled-coil heterodimer **dA/B** (PDB ID: 1KD9). Calculated staple length measured from  $\beta$ -carbon to  $\beta$ -carbon within model staple structures (see supporting information) optimized in Gaussian 16 using density functional theory APFD and the 6-31G+d,p basis set.  $\Delta\Delta G$ ,  $\Delta\Delta H$ , and  $-\Delta\Delta S$  values for each variant are given  $\pm$  std. error in kcal/mol at the melting temperature of its corresponding non-stapled counterpart at 15  $\mu$ M protein concentration in 20 mM sodium phosphate buffer (pH 7) + 4.0 M GdnHCl, except for affibody **a**, non-stapled **a8/42-xx**, and stapled **sa8/42-x4x**, which were characterized without denaturant.

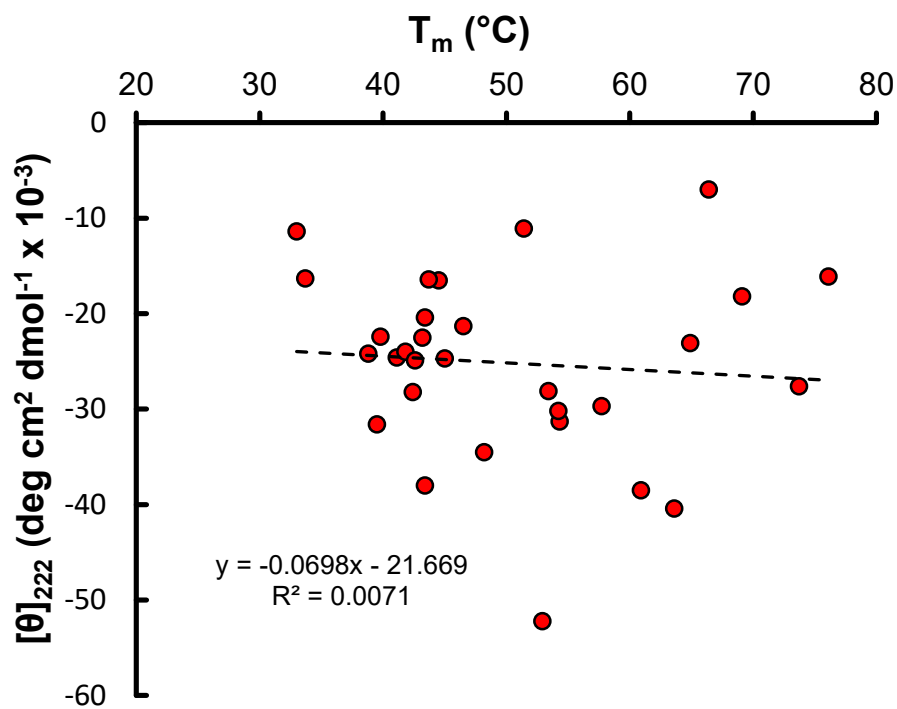

Figure S119. Plot of  $[\theta]_{222}$  vs. melting temperature for variants **d27e/29g'-z4x** and **sd27e/29g'-z4x**; **d27e/22g'-z4x** and **sd27e/22g'-z4x**; **d24b/25c'-z4x** and **sd24b/25c'-z4x**; **d20e/22g'-z4x** and **sd20e/22g'-z4x**; **d13e/15g'-z4x** and **sd13e/15g'-z4x**; **d6e/8g'-z4x** and **sd6e/8g'-z4x**; **d6e/1g'-z4x** and **sd6e/1g'-z4x**; **d27e/29g'-z2x** and **sd27e/29g'-z2x**; **d27e/22g'-z2x** and **sd27e/22g'-z2x**; **d24b/25c'-z4y4** and **sd24b/25c'-z4y4**; **d7f/10b'-z4x** and **sd7f/10b'-z4x**; **d7f/10b'-z4y4** and **sd7f/10b'-z4y4**; **d27e/29g'-xx**, **sd27e/29g'-x4x**, and **sd27e/29g'-x4px**; and HER2 affibody variants **a**, **a8/42-xx** and **sa8/42-x4x**.

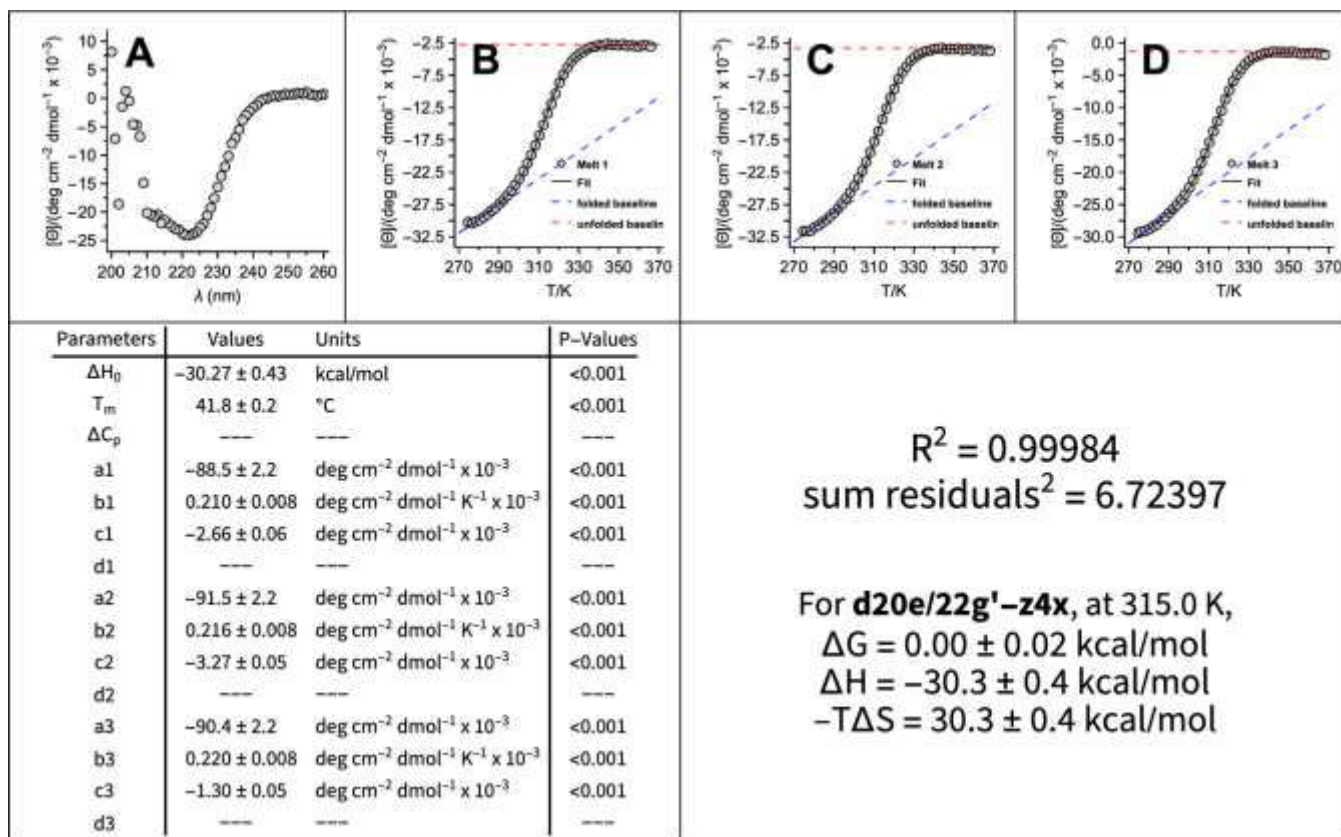

**Figure S120.** (A) CD spectra and (B–D) variable temperature CD data (triplicate) for 15  $\mu\text{M}$  disulfide-bound coiled-coil variant **d20e/22g'-z4x** (ZJ10511) in 20 mM sodium phosphate (pH 7) with 4 M GdnHCl. Fit parameters from eq. S1–S3 appear in the table, as do calculated values of  $\Delta G_f$ ,  $\Delta H_f$ , and  $-T\Delta S_f \pm$  standard error at the indicated temperature.

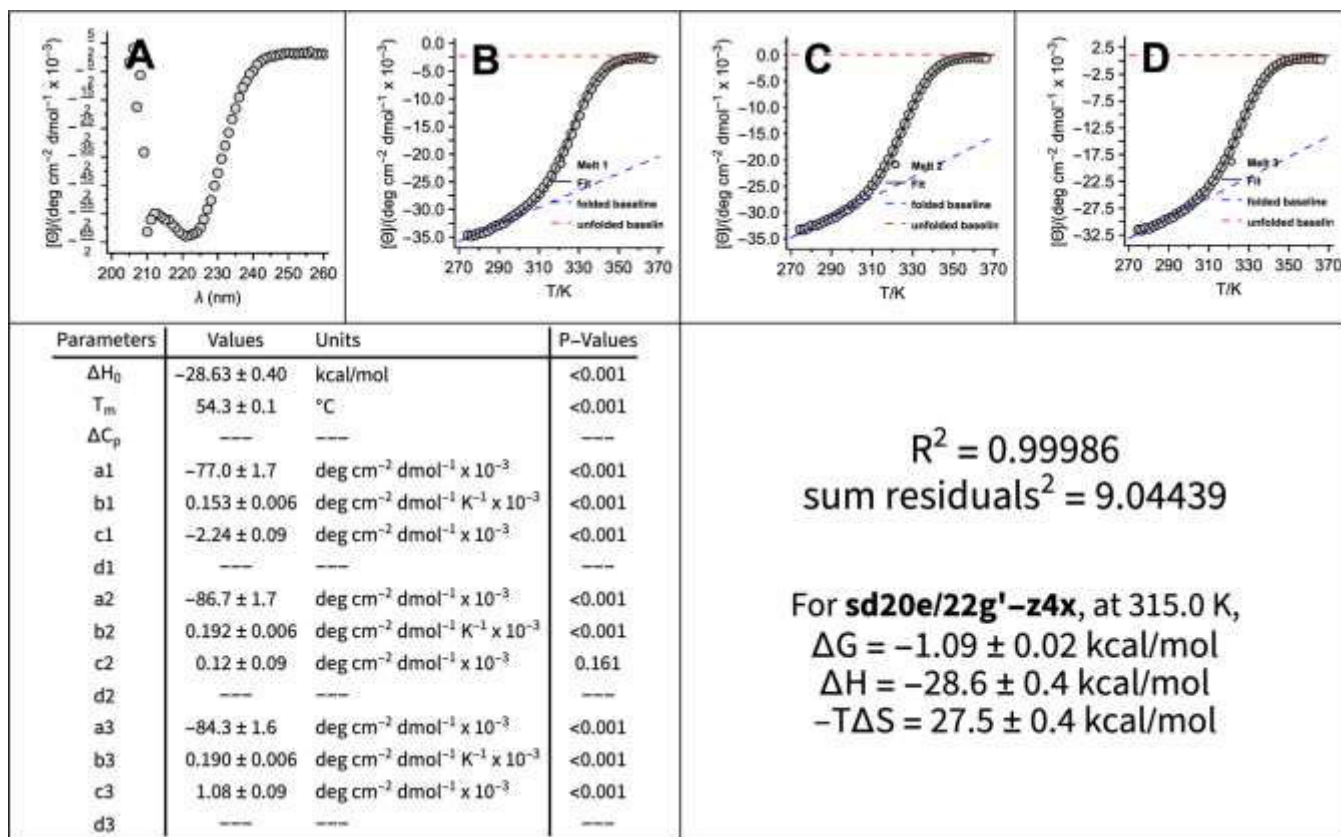

**Figure S121.** (A) CD spectra and (B–D) variable temperature CD data (triplicate) for 15  $\mu\text{M}$  stapled disulfide-bound coiled-coil variant **sd20e/22g'-z4x** (ZJ10511s) in 20 mM sodium phosphate (pH 7) with 4 M GdnHCl. Fit parameters from eq. S1–S3 appear in the table, as do calculated values of  $\Delta G_f$ ,  $\Delta H_f$ , and  $-T\Delta S_f \pm$  standard error at the indicated temperature.

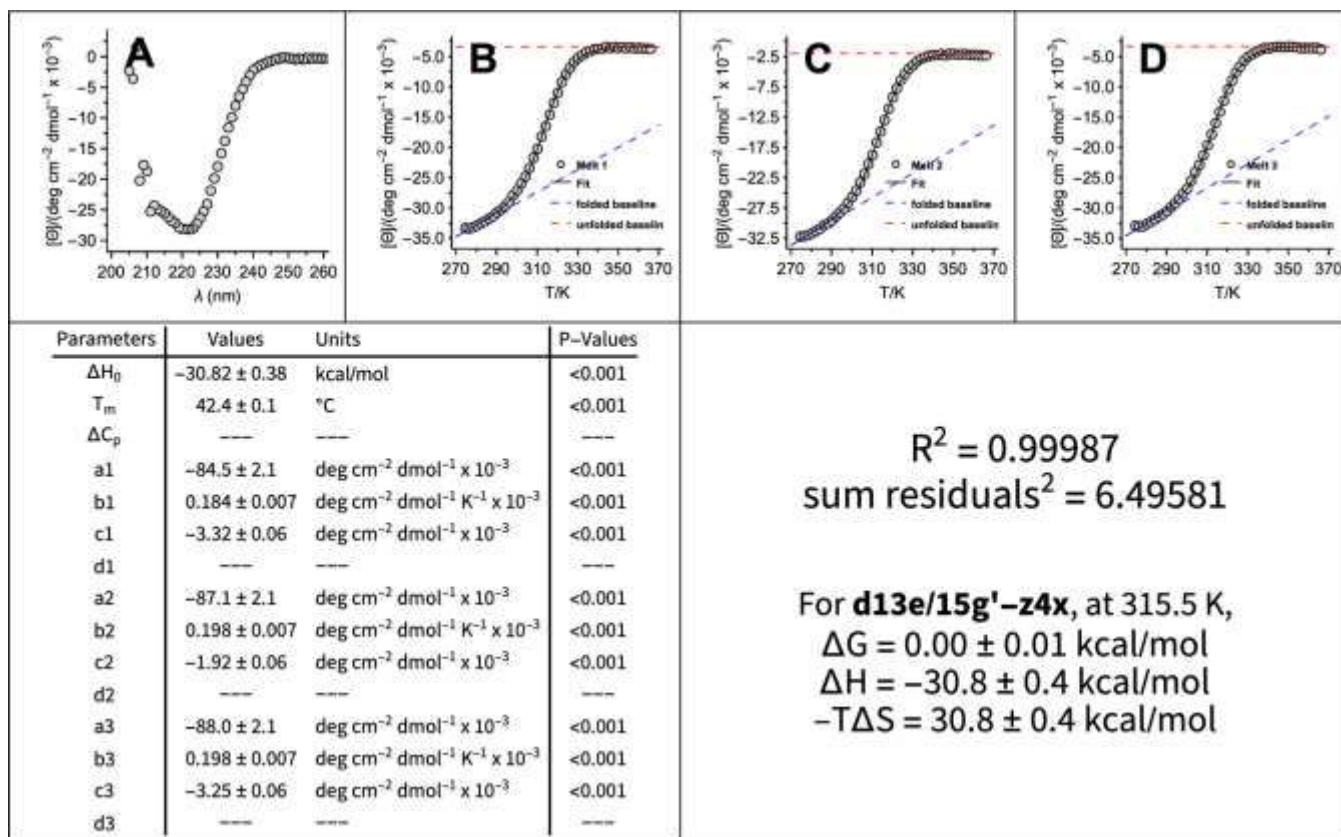

**Figure S122.** (A) CD spectra and (B–D) variable temperature CD data (triplicate) for 15  $\mu\text{M}$  disulfide-bound coiled-coil variant **d13e/15g'-z4x** (QX31171) in 20 mM sodium phosphate (pH 7) with 4 M GdnHCl. Fit parameters from eq. S1–S3 appear in the table, as do calculated values of  $\Delta G_f$ ,  $\Delta H_f$ , and  $-T\Delta S_f \pm$  standard error at the indicated temperature.

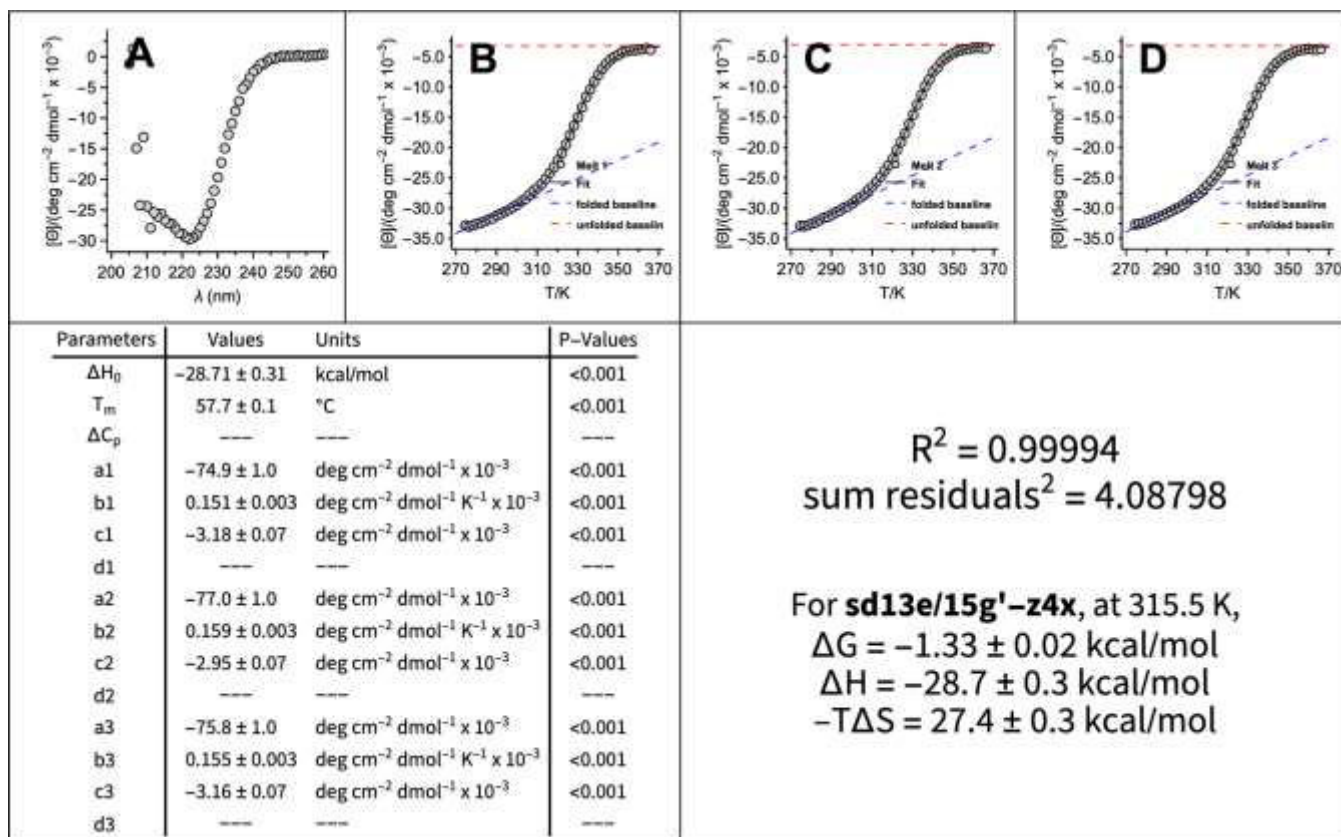

**Figure S123.** (A) CD spectra and (B–D) variable temperature CD data (triplicate) for 15  $\mu\text{M}$  stapled disulfide-bound coiled-coil variant **sd13e/15g'-z4x** (QX31171s) in 20 mM sodium phosphate (pH 7) with 4 M GdnHCl. Fit parameters from eq. S1–S3 appear in the table, as do calculated values of  $\Delta G_f$ ,  $\Delta H_f$ , and  $-T\Delta S_f \pm$  standard error at the indicated temperature.



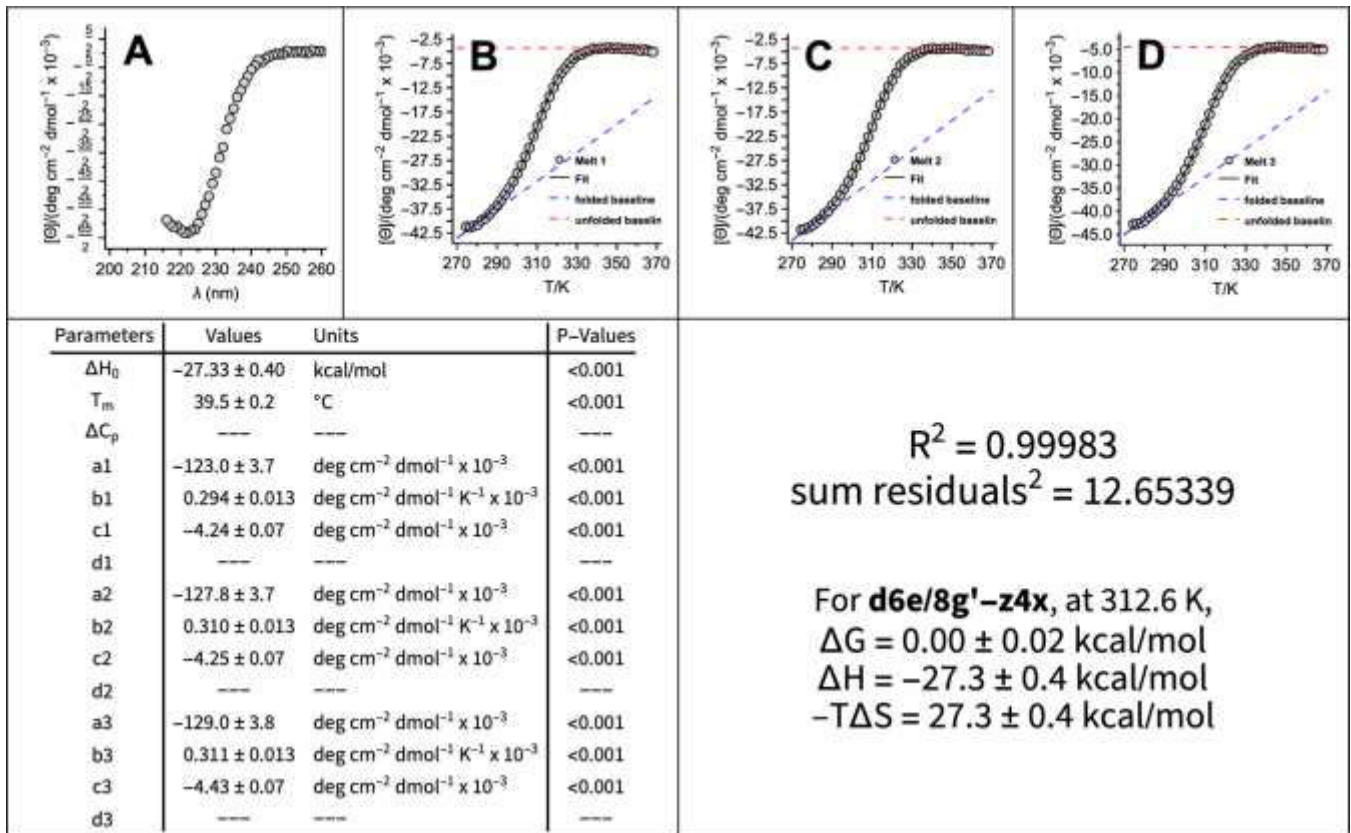

**Figure S124.** (A) CD spectra and (B–D) variable temperature CD data (triplicate) for 15  $\mu\text{M}$  disulfide-bound coiled-coil variant **d6e/8g'-z4x** (QX2292) in 20 mM sodium phosphate (pH 7) with 4 M GdnHCl. Fit parameters from eq. S1–S3 appear in the table, as do calculated values of  $\Delta G_f$ ,  $\Delta H_f$ , and  $-T\Delta S_f \pm$  standard error at the indicated temperature.

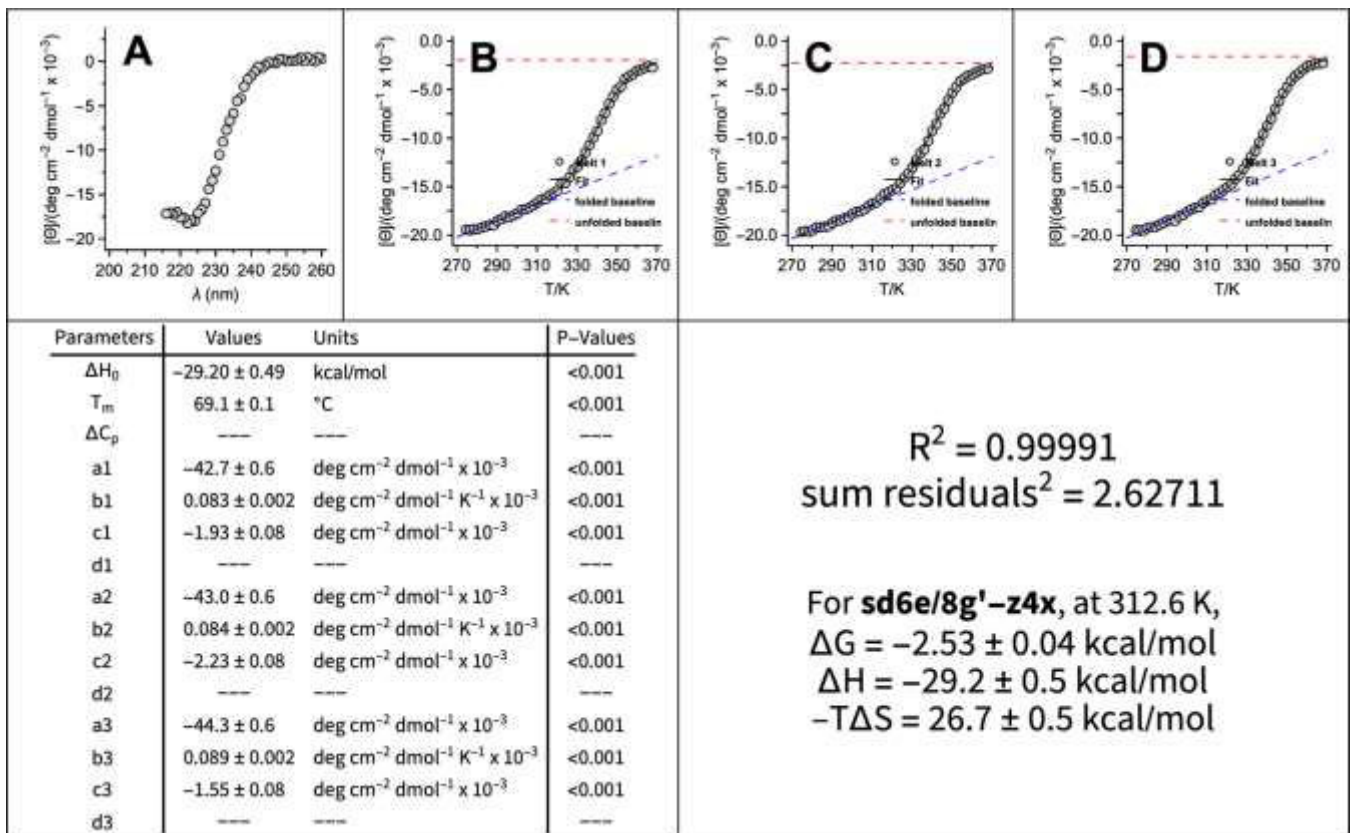

**Figure S125.** (A) CD spectra and (B–D) variable temperature CD data (triplicate) for 15  $\mu\text{M}$  stapled disulfide-bound coiled-coil variant **sd6e/8g'-z4x** (QX2292s) in 20 mM sodium phosphate (pH 7) with 4 M GdnHCl. Fit parameters from eq. S1–S3 appear in the table, as do calculated values of  $\Delta G_f$ ,  $\Delta H_f$ , and  $-T\Delta S_f \pm$  standard error at the indicated temperature.

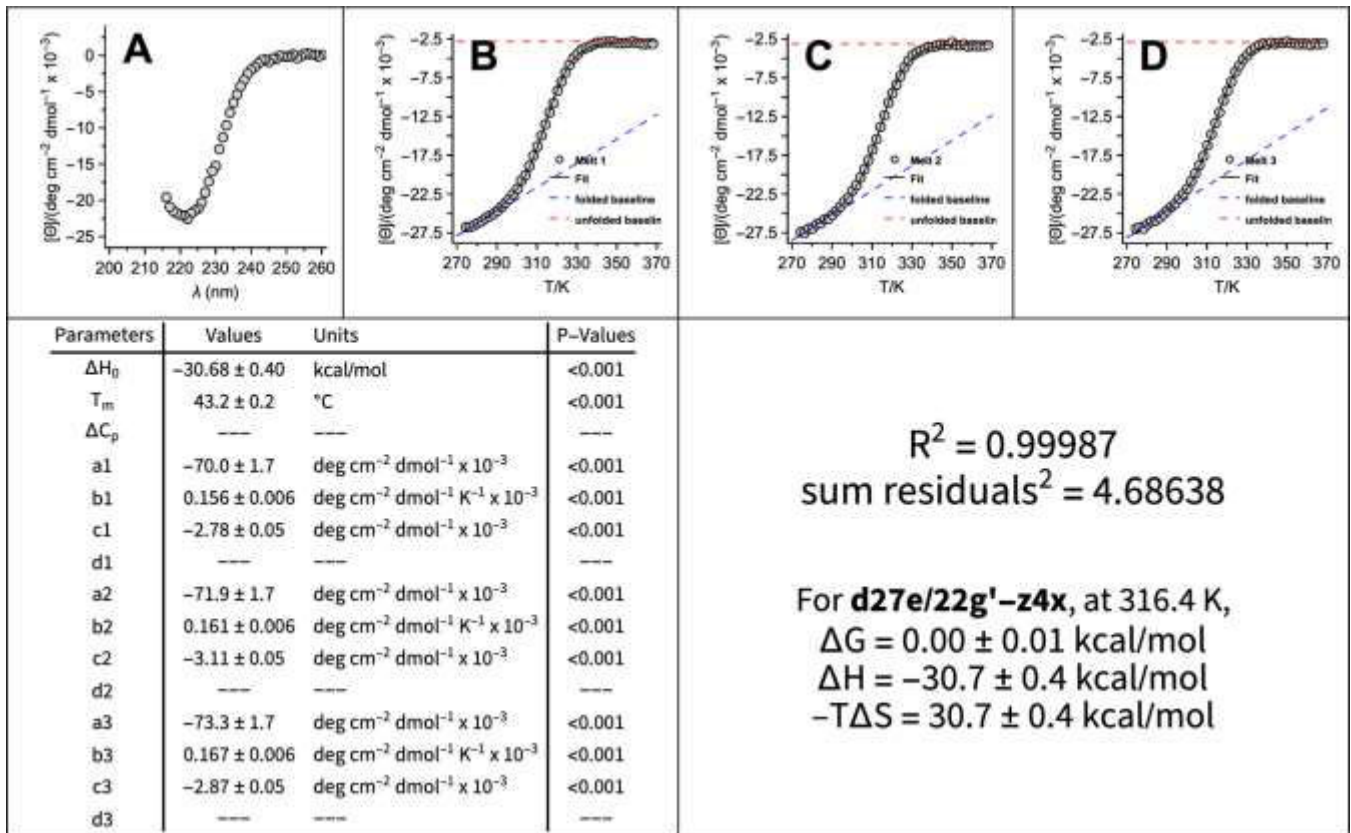

**Figure S126.** (A) CD spectra and (B–D) variable temperature CD data (triplicate) for 15  $\mu\text{M}$  disulfide-bound coiled-coil variant **d27e/22g'-z4x** (QX2294) in 20 mM sodium phosphate (pH 7) with 4 M GdnHCl. Fit parameters from eq. S1–S3 appear in the table, as do calculated values of  $\Delta G_f$ ,  $\Delta H_f$ , and  $-T\Delta S_f \pm$  standard error at the indicated temperature.

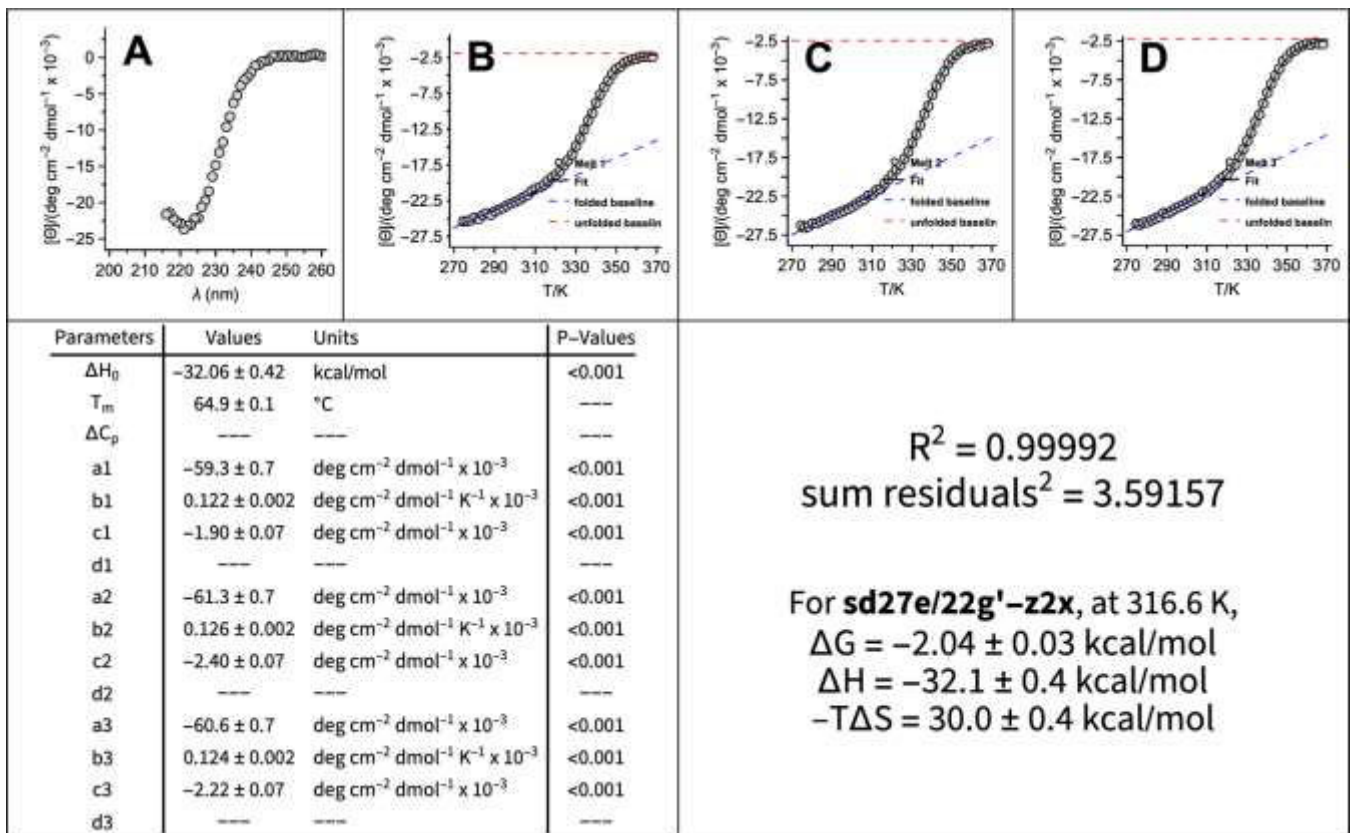

**Figure S127.** (A) CD spectra and (B–D) variable temperature CD data (triplicate) for 15  $\mu\text{M}$  disulfide-bound coiled-coil variant **sd27e/22g'-z2x** (QX2294s) in 20 mM sodium phosphate (pH 7) with 4 M GdnHCl. Fit parameters from eq. S1–S3 appear in the table, as do calculated values for  $\Delta G_f$ ,  $\Delta H_f$ , and  $-T\Delta S_f \pm$  standard error at the indicated temperature.

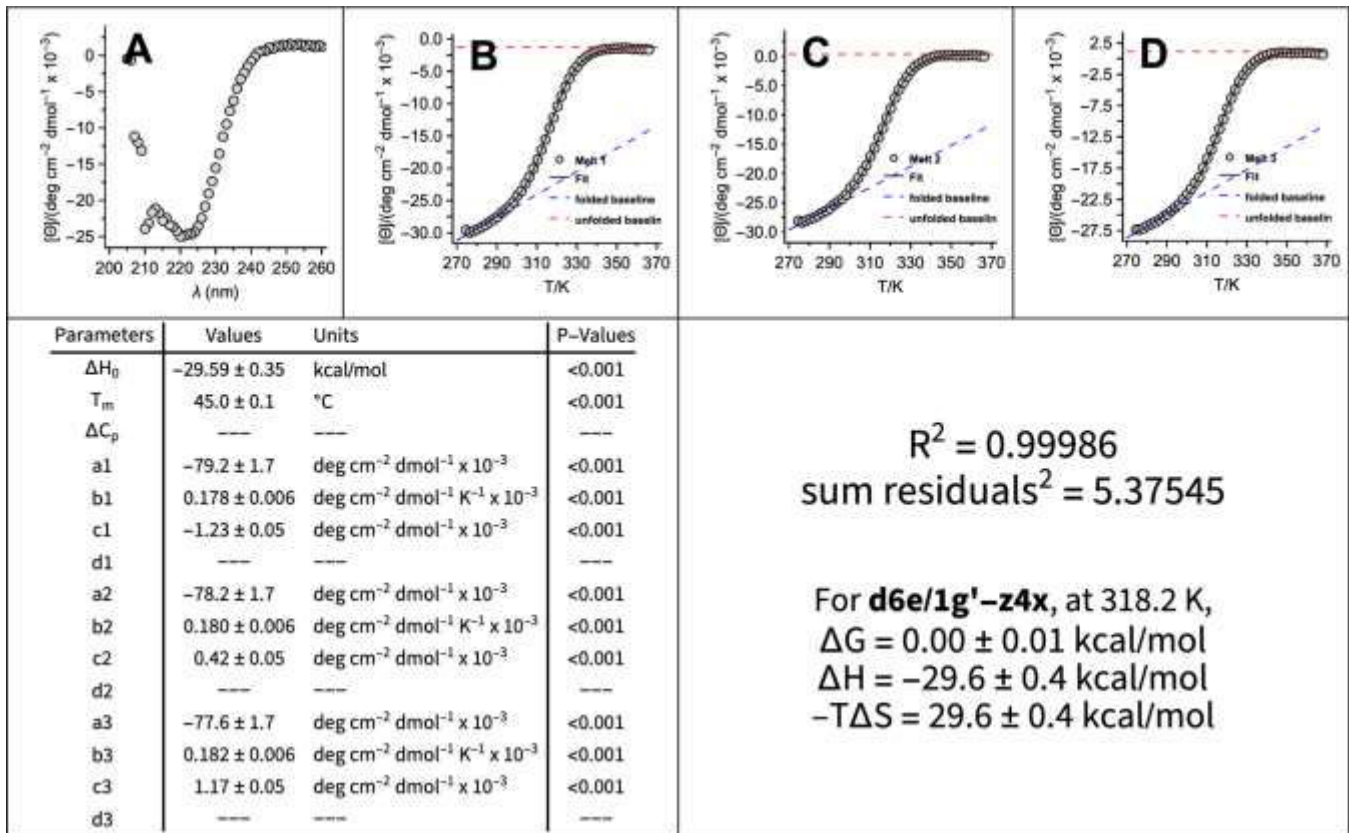

**Figure S128.** (A) CD spectra and (B–D) variable temperature CD data (triplicate) for 15  $\mu\text{M}$  disulfide-bound coiled-coil variant **d6e/1g'-z4x** (QX31172) in 20 mM sodium phosphate (pH 7) with 4 M GdnHCl. Fit parameters from eq. S1–S3 appear in the table, as do calculated values of  $\Delta G_f$ ,  $\Delta H_f$ , and  $-T\Delta S_f \pm$  standard error at the indicated temperature.

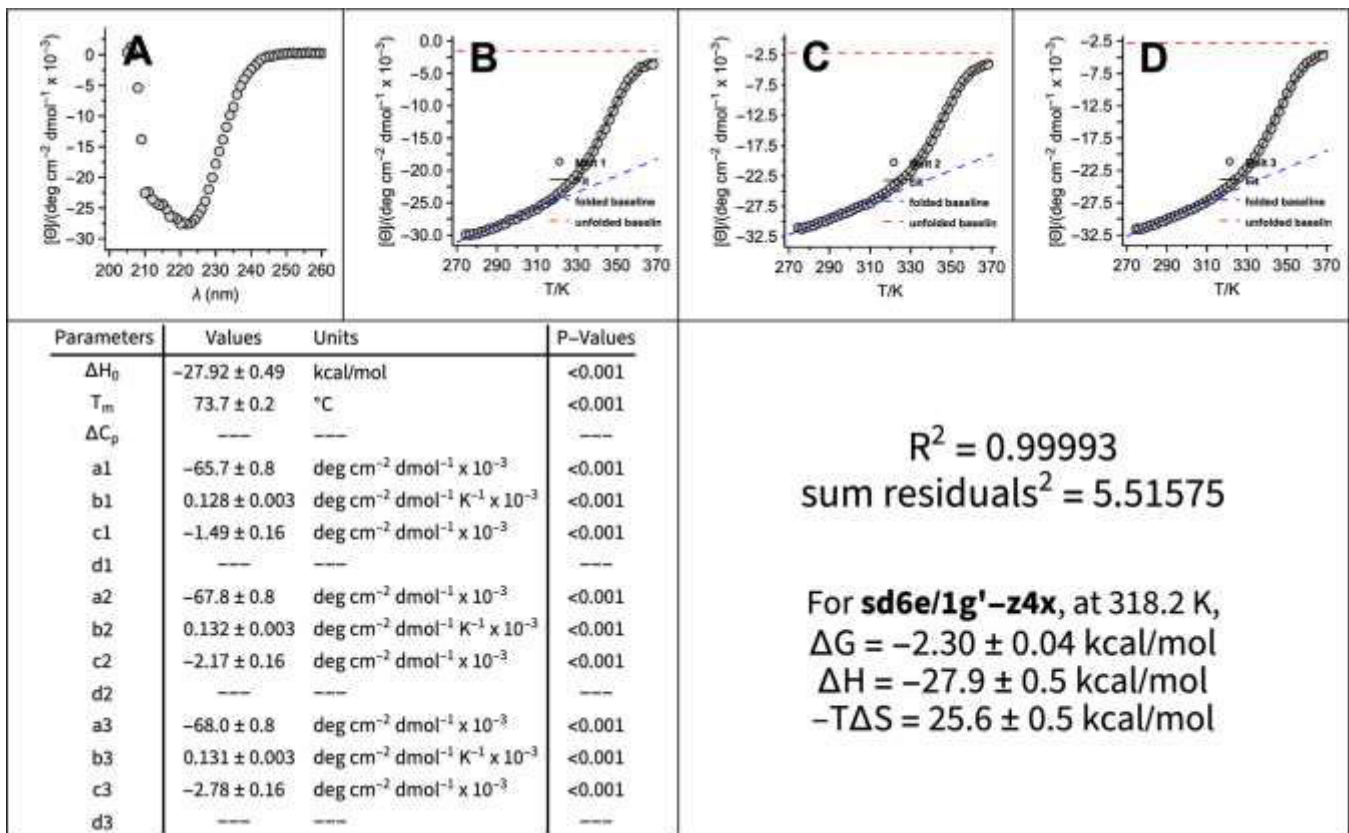

**Figure S129.** (A) CD spectra and (B–D) variable temperature CD data (triplicate) for 15  $\mu\text{M}$  stapled disulfide-bound coiled-coil variant **sd6e/1g'-z4x** (QX31172s) in 20 mM sodium phosphate (pH 7) with 4 M GdnHCl. Fit parameters from eq. S1–S3 appear in the table, as do calculated values of  $\Delta G_f$ ,  $\Delta H_f$ , and  $-T\Delta S_f \pm$  standard error at the indicated temperature.

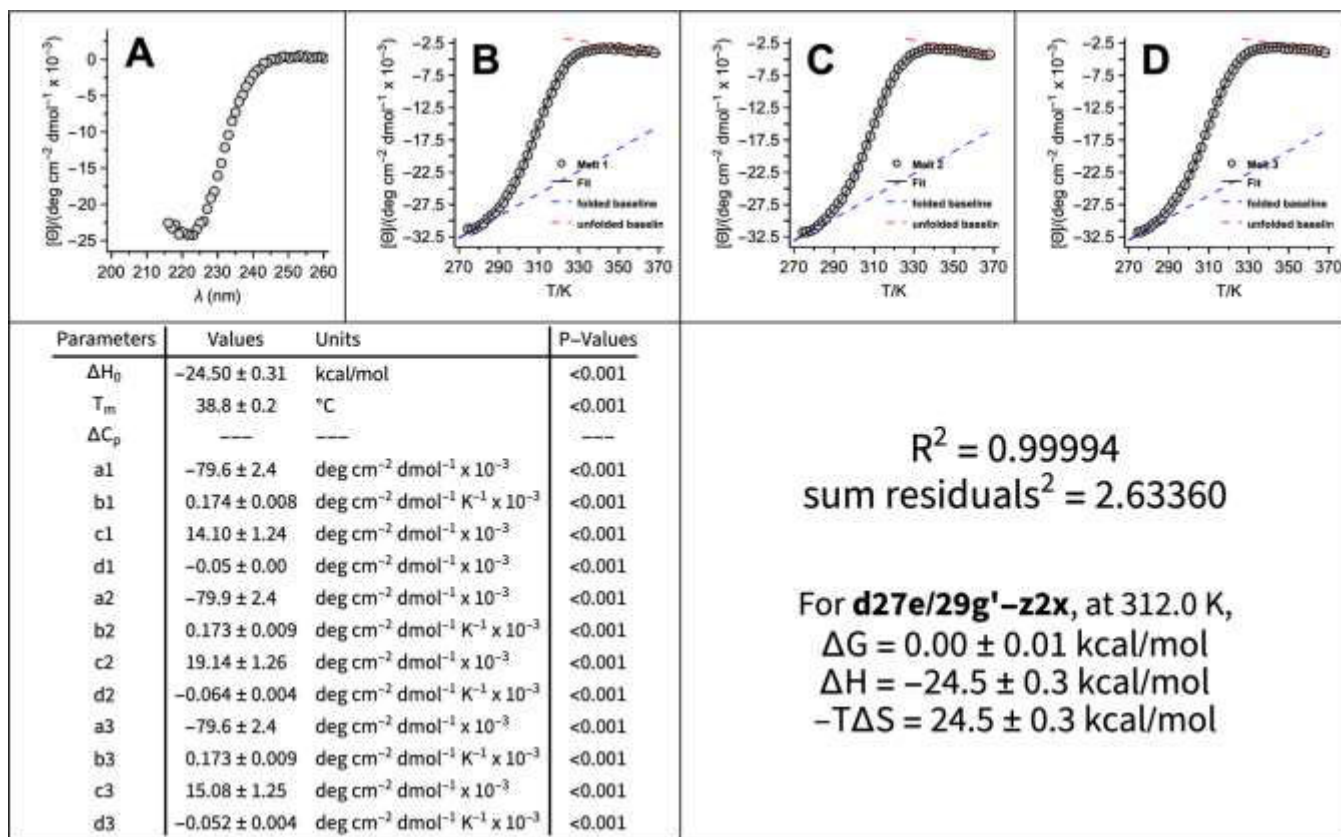

**Figure S130.** (A) CD spectra and (B–D) variable temperature CD data (triplicate) for 15  $\mu\text{M}$  disulfide-bound coiled-coil variant **d27e/29g'-z2x** (QX2289) in 20 mM sodium phosphate (pH 7) with 4 M GdnHCl. Fit parameters from equations S1–S3 appear in the table, as do calculated values for  $\Delta G_f$ ,  $\Delta H_f$ , and  $-T\Delta S_f$  at  $\pm$  standard error at the indicated temperature.

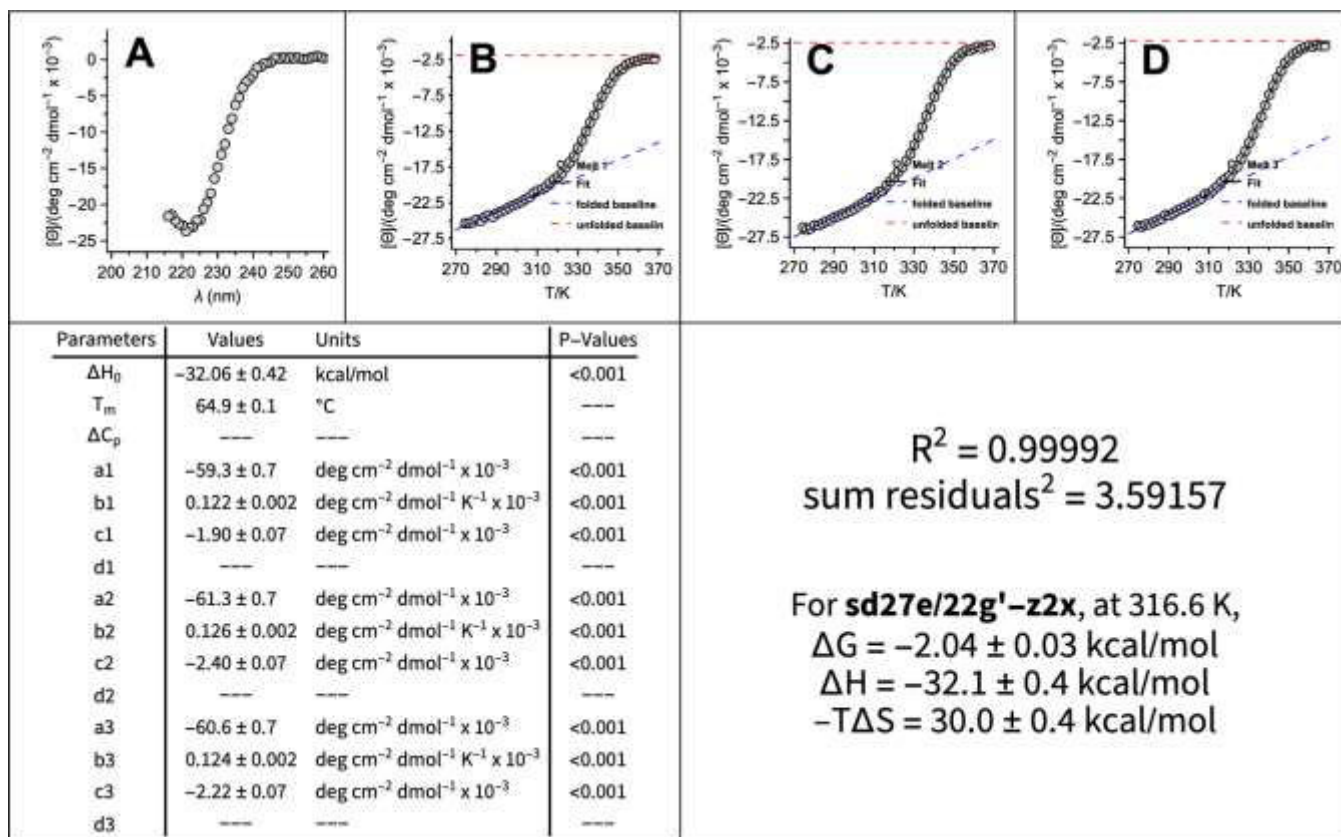

**Figure S131.** (A) CD spectra and (B–D) variable temperature CD data (triplicate) for 15  $\mu\text{M}$  stapled disulfide-bound coiled-coil variant **sd27e/29g'-z2x** (QX2289s) in 20 mM sodium phosphate (pH 7) with 4 M GdnHCl. Fit parameters from equations S1–S3 appear in the table, as do calculated values for  $\Delta G_f$ ,  $\Delta H_f$ , and  $-T\Delta S_f$  at  $\pm$  standard errors at the indicated temperature.



**Figure S132.** (A) CD spectra and (B–D) variable temperature CD data (triplicate) for 15  $\mu\text{M}$  disulfide-bound coiled-coil variant **d27e/22g'-z4x** (QX2293) in 20 mM sodium phosphate (pH 7) with 4 M GdnHCl. Fit parameters from equations S1–S3 appear in the table, as do calculated values for  $\Delta G_f$ ,  $\Delta H_f$ , and  $-T\Delta S_f \pm$  standard error at the indicated temperature.



**Figure S133.** (A) CD spectra and (B–D) variable temperature CD data (triplicate) for 15  $\mu\text{M}$  stapled disulfide-bound coiled-coil variant **sd27e/22g'-z4x** (QX2293s) in 20 mM sodium phosphate (pH 7) with 4 M GdnHCl. Fit parameters from equations S1–S3 appear in the table, as do calculated values for  $\Delta G_f$ ,  $\Delta H_f$ , and  $-T\Delta S_f \pm$  standard error at the indicated temperature.

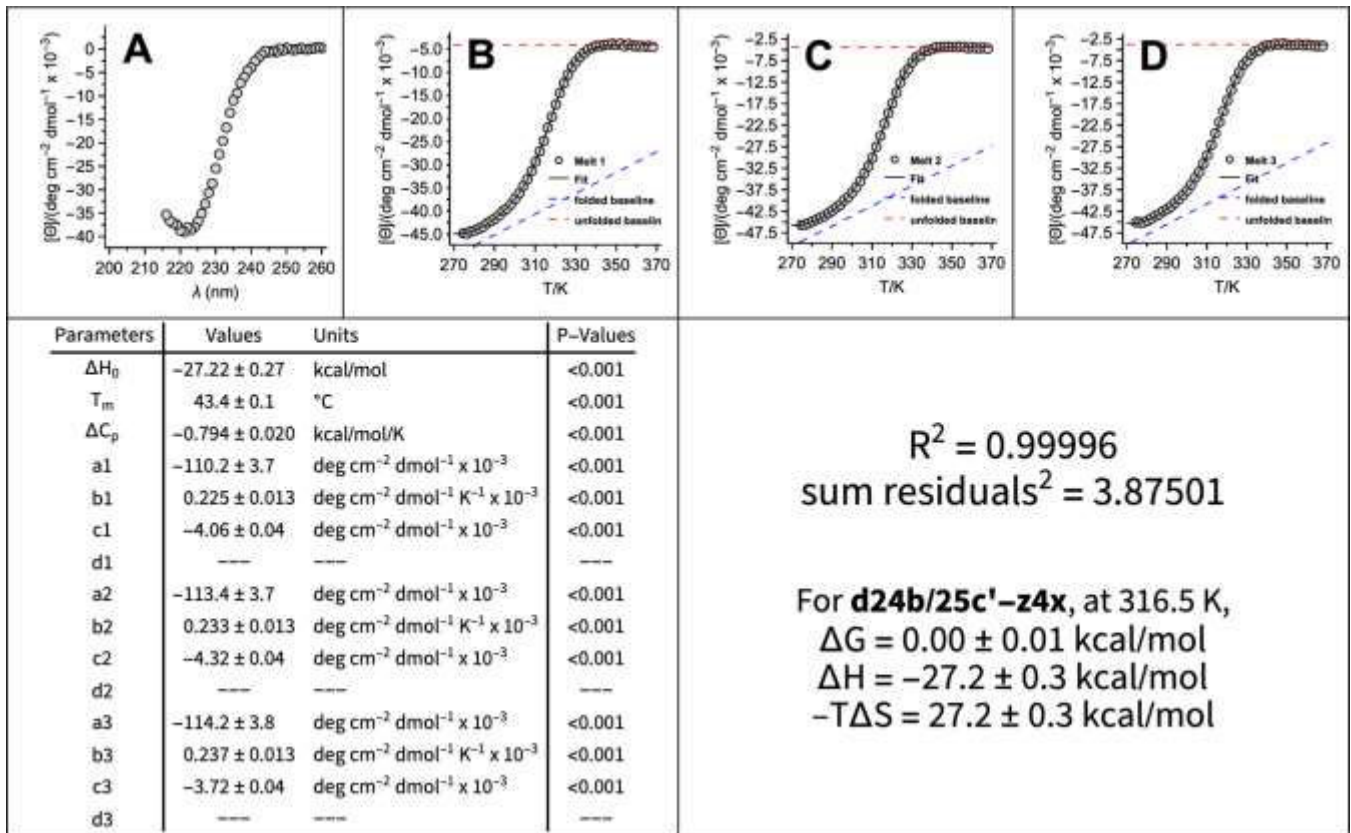

**Figure S134.** (A) CD spectra and (B–D) variable temperature CD data (triplicate) for 15  $\mu\text{M}$  disulfide-bound coiled-coil variant **d24b/25c'-z4x** (QX2291) in 20 mM sodium phosphate (pH 7) with 4 M GdnHCl. Fit parameters from eq. S1–S3 appear in the table, as do calculated values for  $\Delta G_f$ ,  $\Delta H_f$ , and  $-T\Delta S_f \pm$  standard error at the indicated temperature.

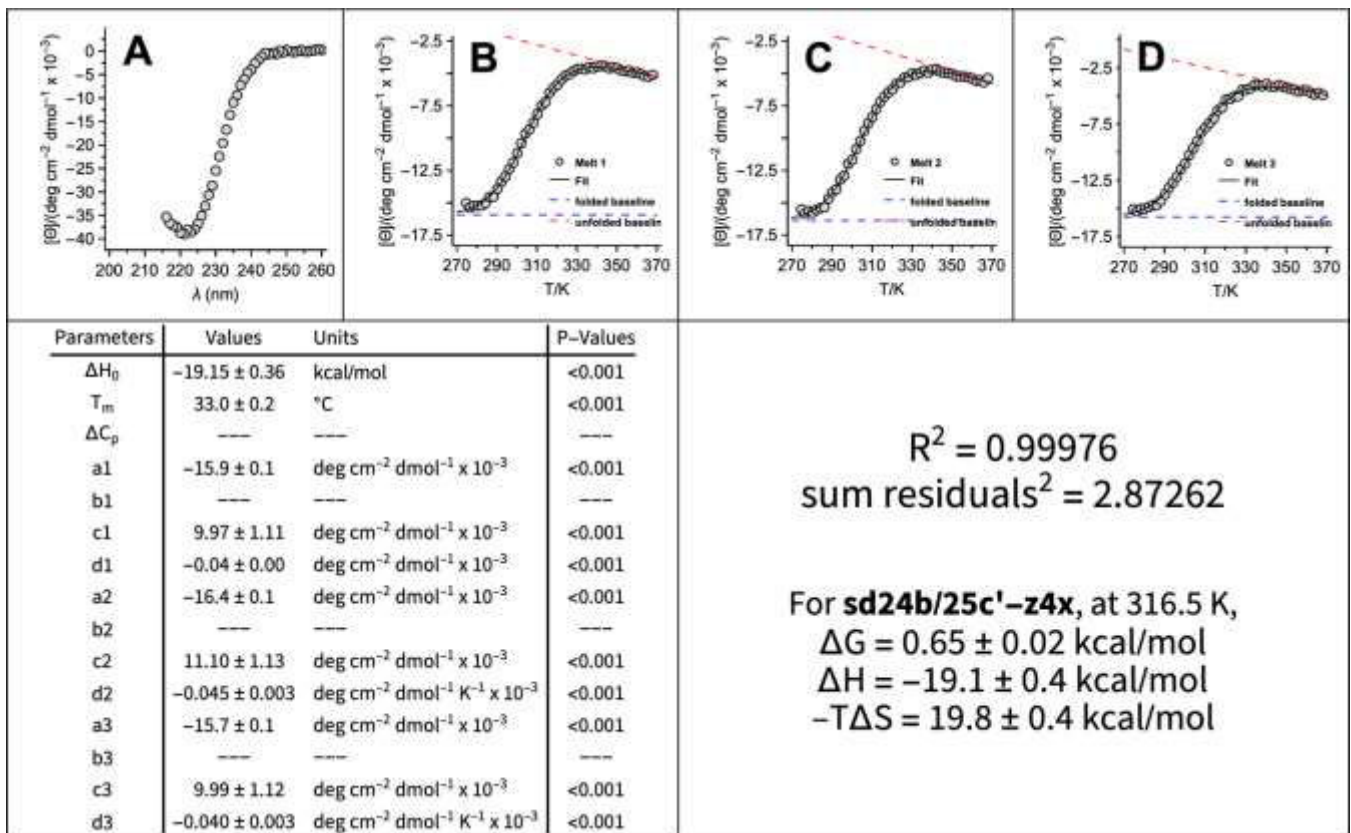

**Figure S135.** (A) CD spectra and (B–D) variable temperature CD data (triplicate) for 15  $\mu\text{M}$  stapled disulfide-bound coiled-coil variant **sd24b/25c'-z4x** (QX2291s) in 20 mM sodium phosphate (pH 7) with 4 M GdnHCl. Fit parameters from eq. S1–S3 appear in the table, as do calculated values for  $\Delta G_f$ ,  $\Delta H_f$ , and  $-T\Delta S_f \pm$  standard error at the indicated temperature.

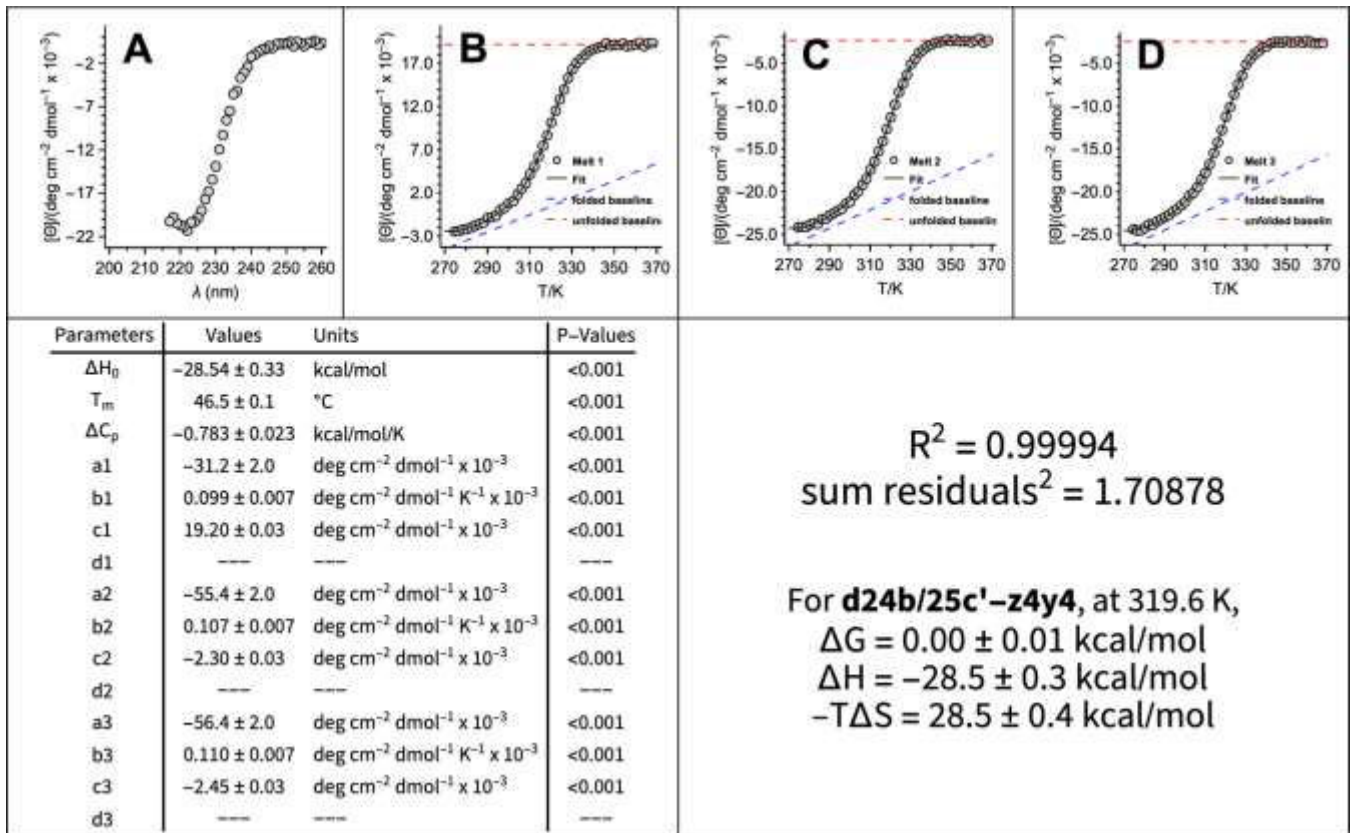

**Figure S136.** (A) CD spectra and (B–D) variable temperature CD data (triplicate) for 15  $\mu\text{M}$  disulfide-bound coiled-coil variant **d24b/25c'-z4y4** (QX3096) in 20 mM sodium phosphate (pH 7) with 4 M GdnHCl. Fit parameters from equations S1–S3 appear in the table, as do calculated values for  $\Delta G_f$ ,  $\Delta H_f$ , and  $-T\Delta S_f \pm$  standard error at the indicated temperature.

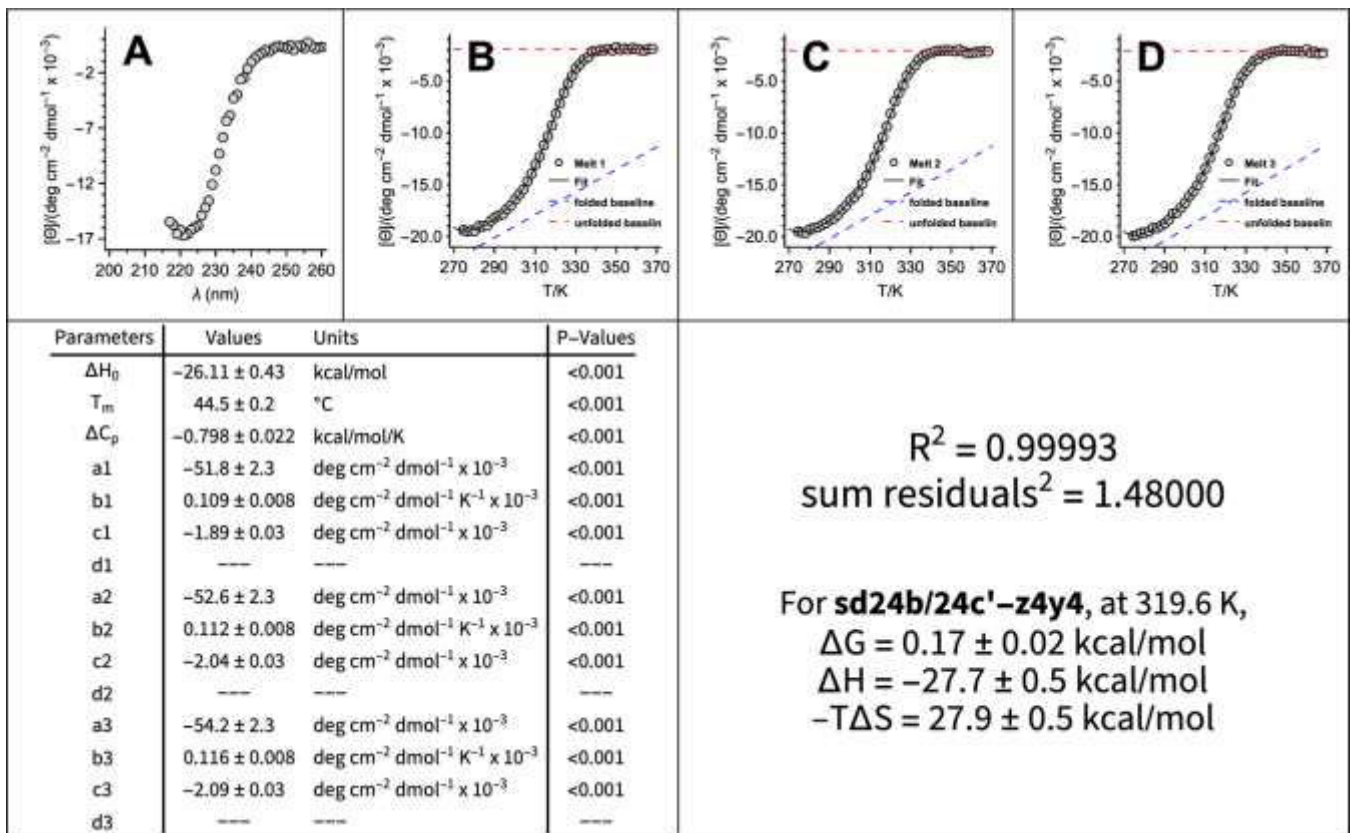

**Figure S137.** (A) CD spectra and (B–D) variable temperature CD data (triplicate) for 15  $\mu\text{M}$  stapled disulfide-bound coiled-coil variant **sd24b/24c'-z4y4** (QX3096s) in 20 mM sodium phosphate (pH 7) with 4 M GdnHCl. Fit parameters from equations S1–S3 appear in the table, as do calculated values for  $\Delta G_f$ ,  $\Delta H_f$ , and  $-T\Delta S_f \pm$  standard error at the indicated temperature.

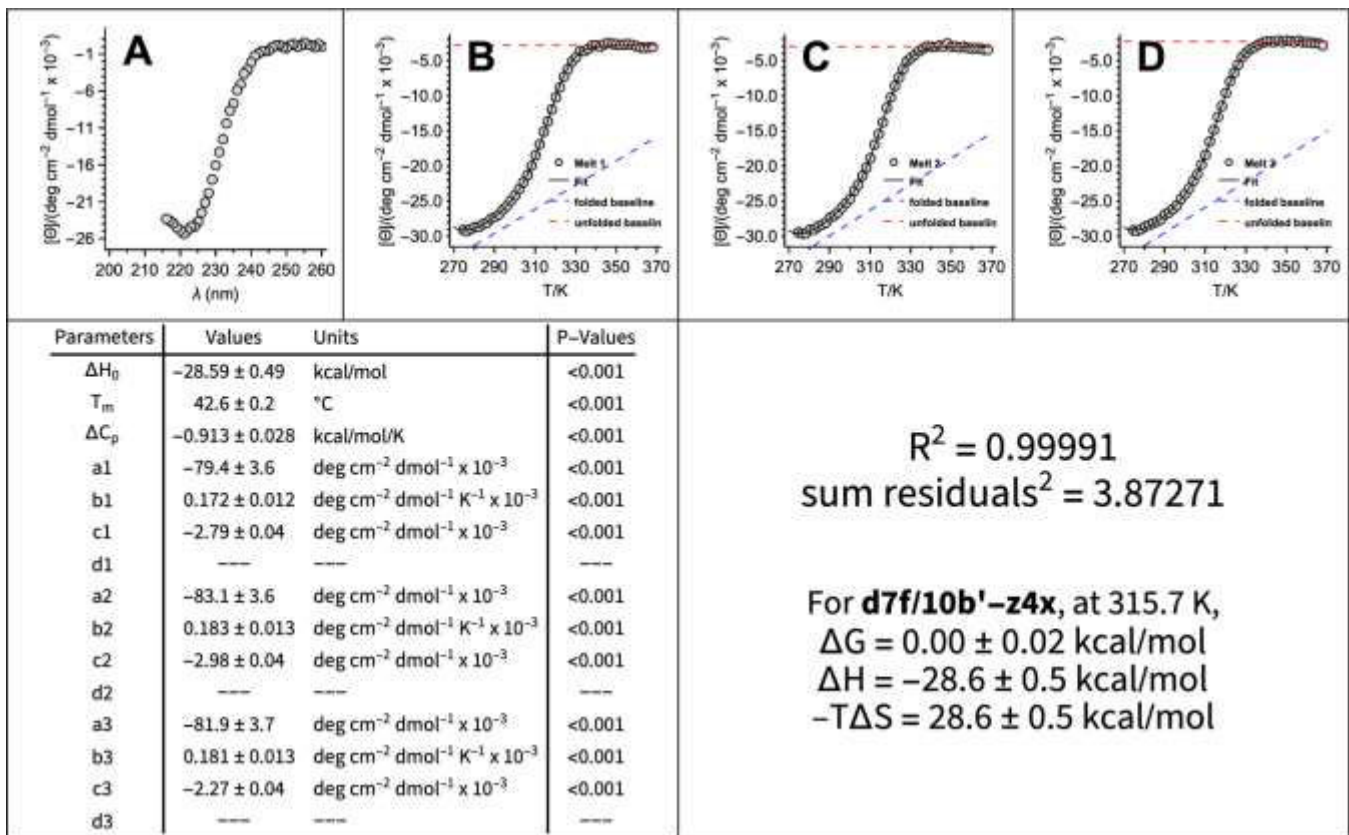

**Figure S138.** (A) CD spectra and (B–D) variable temperature CD data (triplicate) for 15  $\mu\text{M}$  stapled disulfide-bound coiled-coil variant **d7f/10b'-z4x** (QX2295) in 20 mM sodium phosphate (pH 7) with 4 M GdnHCl. Fit parameters from equations S1–S3 appear in the table, as do calculated values for  $\Delta G_f$ ,  $\Delta H_f$ , and  $-T\Delta S_f \pm$  standard error at the indicated temperature.

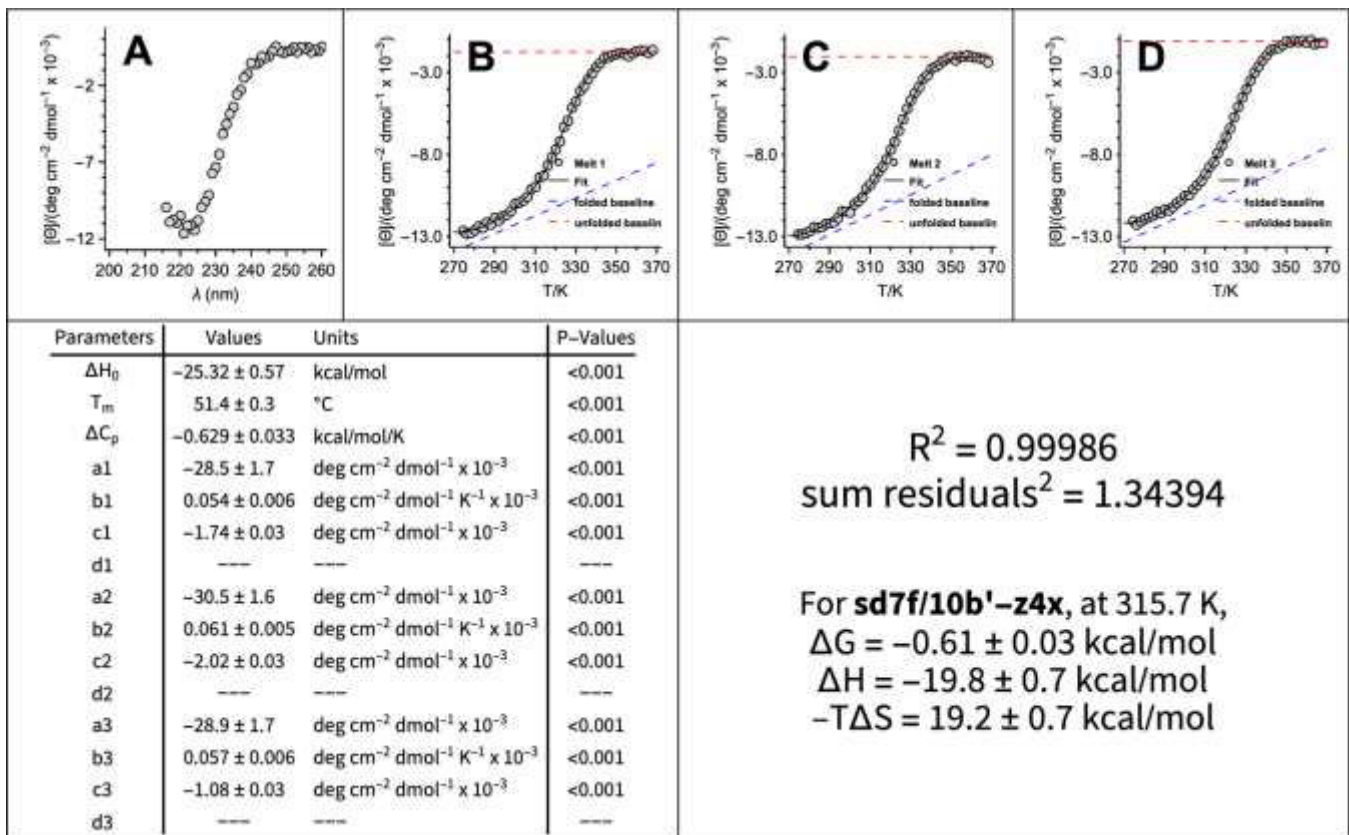

**Figure S139.** (A) CD spectra and (B–D) variable temperature CD data (triplicate) for 15  $\mu\text{M}$  stapled disulfide-bound coiled-coil variant **sd7f/10b'-z4x** (QX2295s) in 20 mM sodium phosphate (pH 7) with 4 M GdnHCl. Fit parameters from equations S1–S3 appear in the table, as do calculated values for  $\Delta G_f$ ,  $\Delta H_f$ , and  $-T\Delta S_f \pm$  standard error at the indicated temperature.



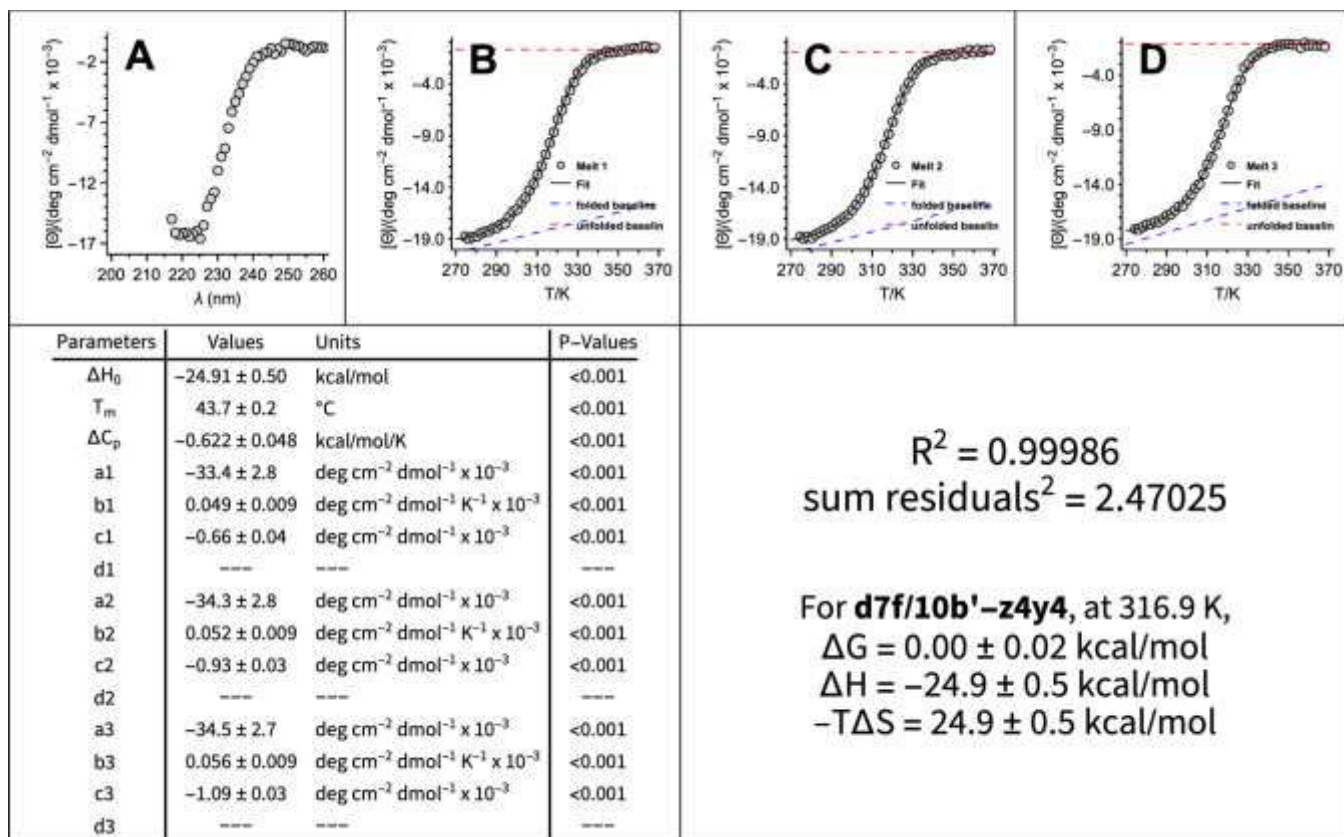

**Figure S86.** (A) CD spectra and (B–D) variable temperature CD data (triplicate) for 15  $\mu\text{M}$  disulfide-bound coiled-coil variant **d7f/10b'-z4y4** (QX3101) in 20 mM sodium phosphate (pH 7) with 4 M GdnHCl. Fit parameters from equations S1–S3 appear in the table, as do calculated values for  $\Delta G_f$ ,  $\Delta H_f$ , and  $-T\Delta S_f \pm$  standard error at the indicated temperature.

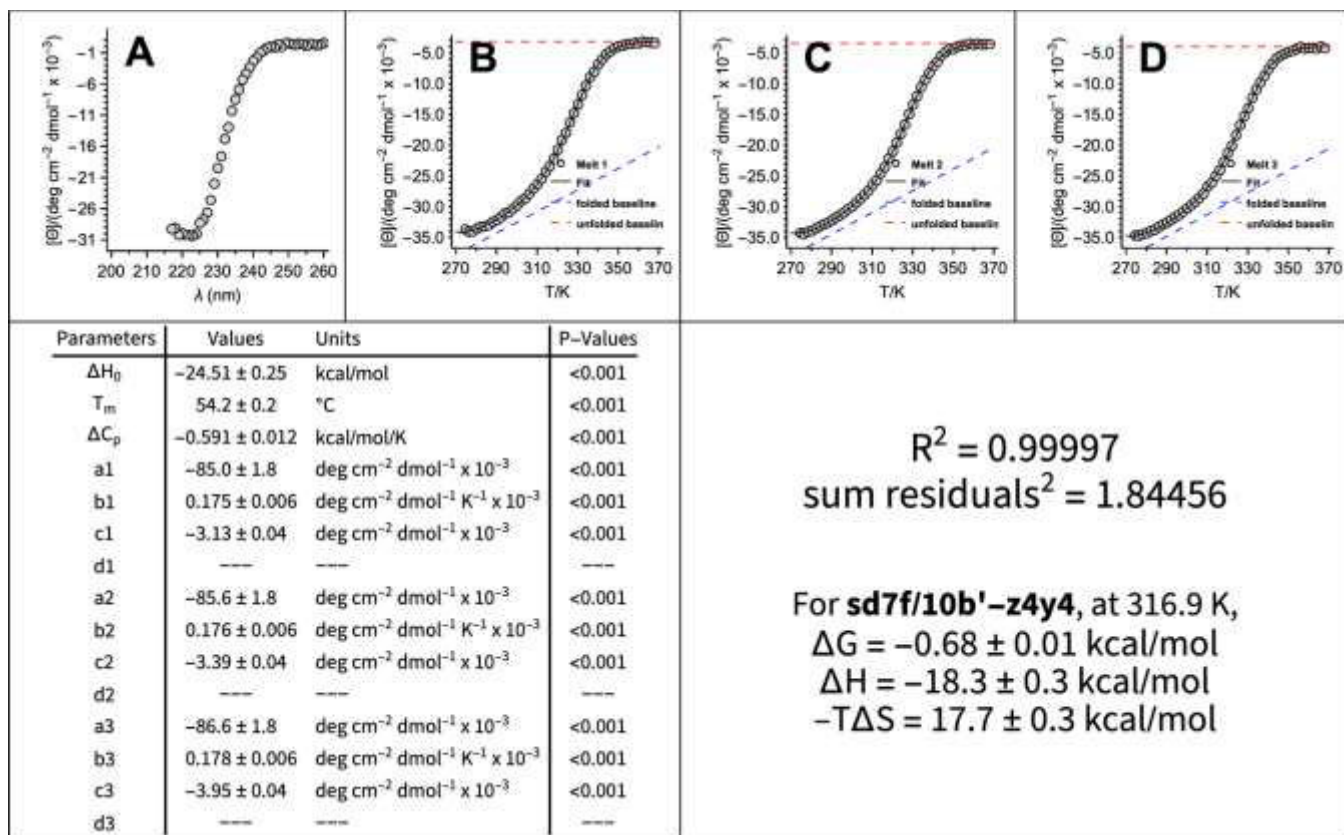

**Figure 141.** (A) CD spectra and (B–D) variable temperature CD data (triplicate) for 15  $\mu\text{M}$  stapled disulfide-bound coiled-coil variant **sd7f/10b'-z4y4** (QX3101s) in 20 mM sodium phosphate (pH 7) with 4 M GdnHCl. Fit parameters from equations S1–S3 appear in the table, as do calculated values for  $\Delta G_f$ ,  $\Delta H_f$ , and  $-T\Delta S_f \pm$  standard error at the indicated temperature.

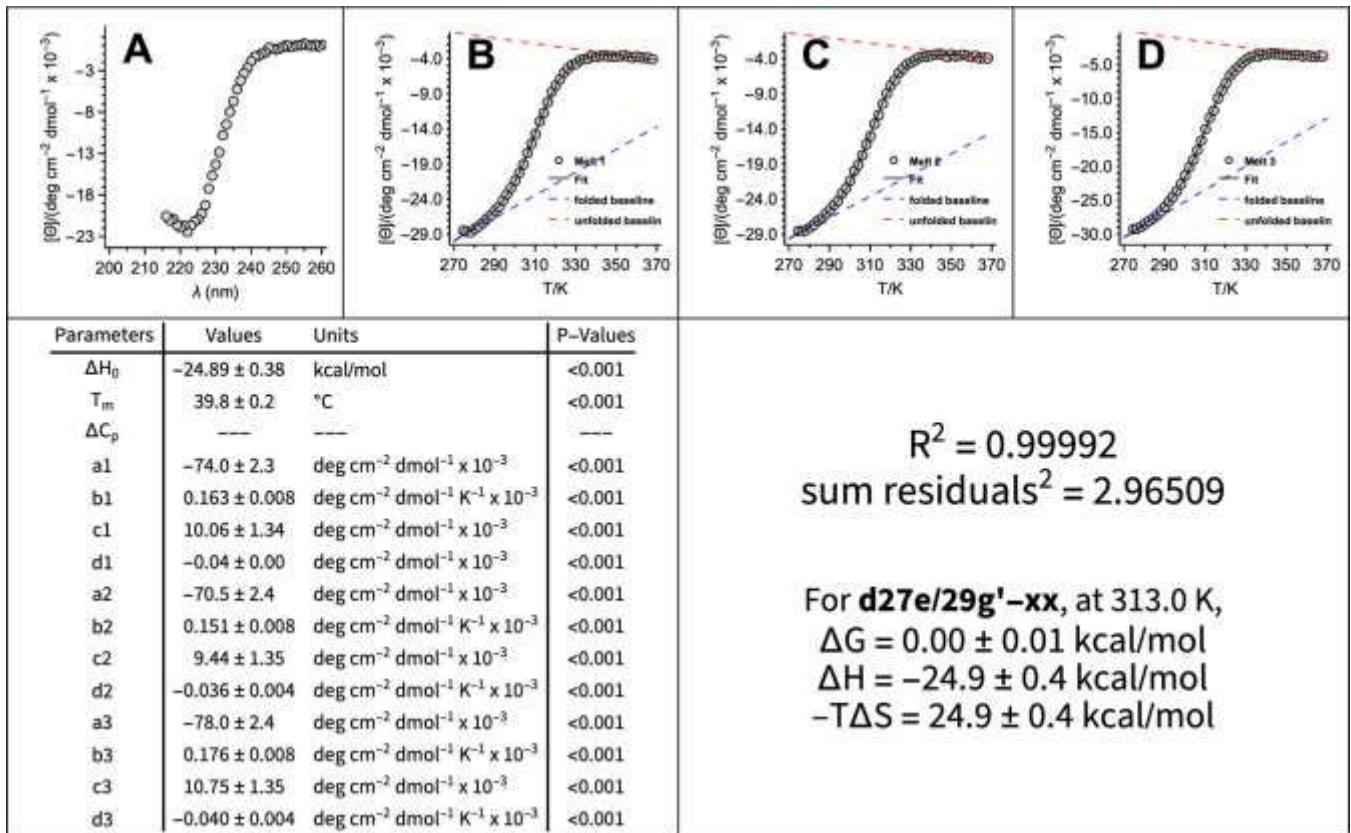

**Figure S142.** (A) CD spectra and (B–D) variable temperature CD data (triplicate) for 15  $\mu\text{M}$  disulfide-bound coiled-coil variant **d27e/29g'-xx** (QX2271) in 20 mM sodium phosphate (pH 7) with 4 M GdnHCl. Fit parameters from equations S1–S3 appear in the table, as do calculated values for  $\Delta G_f$ ,  $\Delta H_f$ , and  $-T\Delta S_f \pm$  standard error at the indicated temperature.

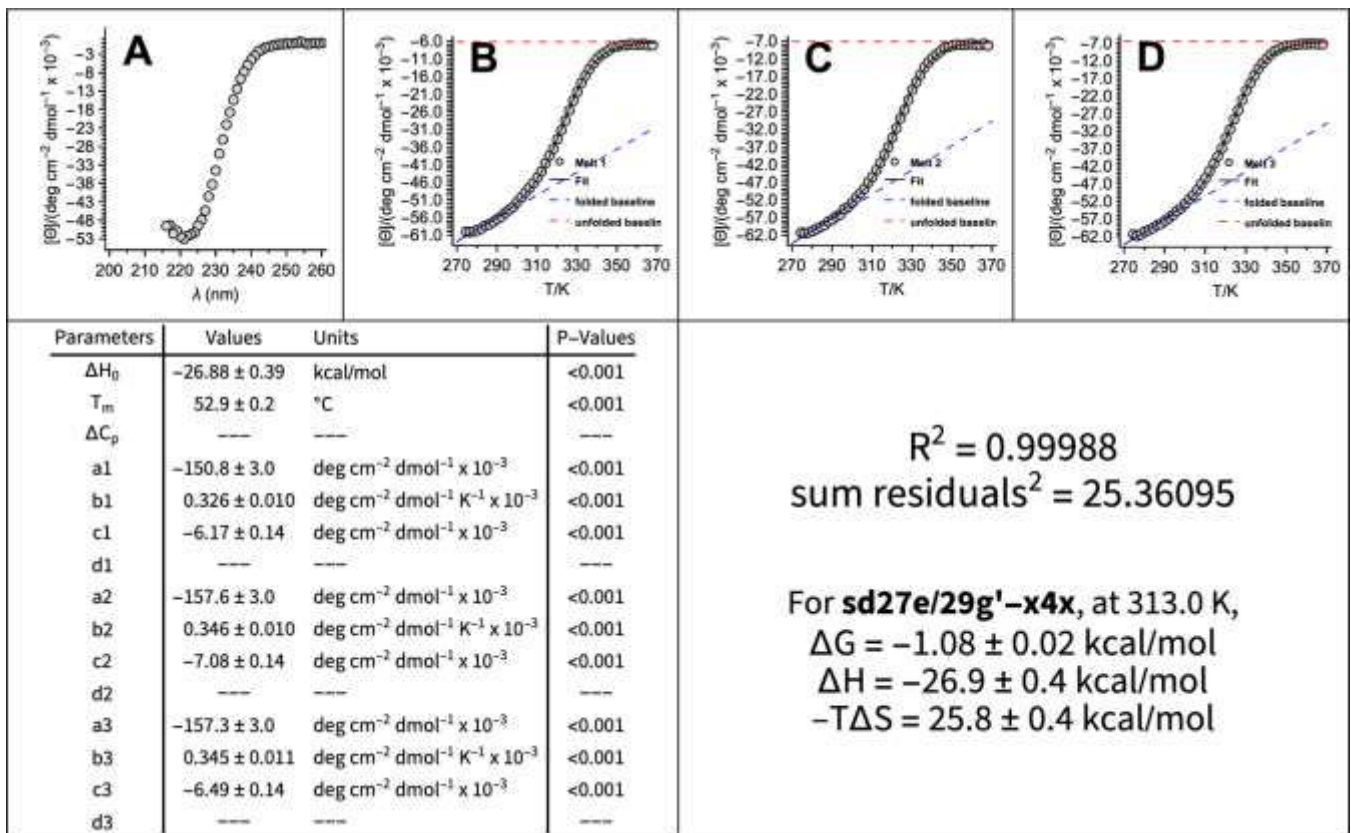

**Figure S143.** (A) CD spectra and (B–D) variable temperature CD data (triplicate) for 15  $\mu\text{M}$  stapled disulfide-bound coiled-coil variant **sd27e/29g'-x4x** (QX2283) in 20 mM sodium phosphate (pH 7) with 4 M GdnHCl. Fit parameters from equations S1–S3 appear in the table, as do calculated values for  $\Delta G_f$ ,  $\Delta H_f$ , and  $-T\Delta S_f \pm$  standard error at the indicated temperature.

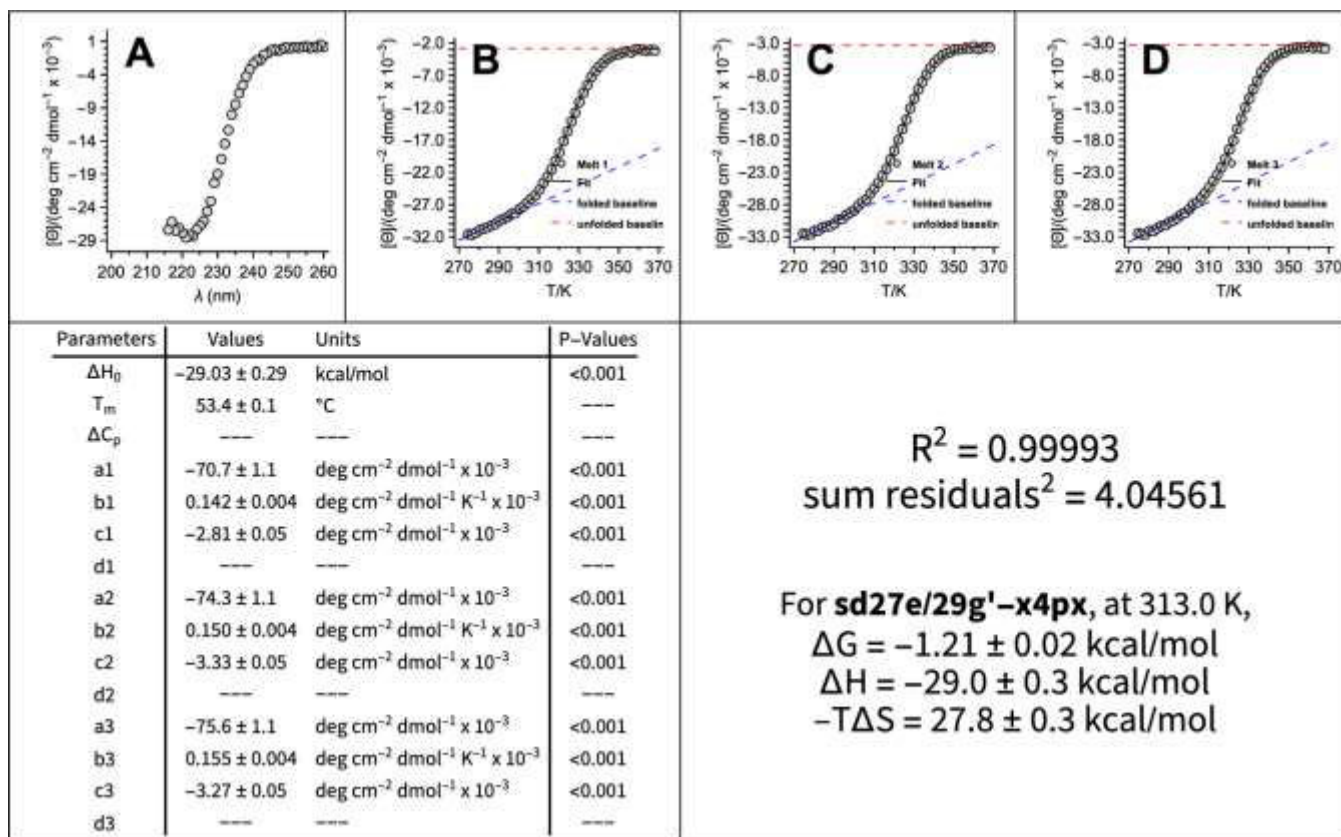

**Figure S144.** (A) CD spectra and (B–D) variable temperature CD data (triplicate) for 15  $\mu\text{M}$  branched PEG-stapled disulfide-bound coiled-coil variant **sd27e/29g'-x4px** (QX3079) in 20 mM sodium phosphate (pH 7) with 4 M GdnHCl. Fit parameters from equations S1–S3 appear in the table, as do calculated values for  $\Delta G_f$ ,  $\Delta H_f$ , and  $-T\Delta S_f \pm$  standard error at the indicated temperature.

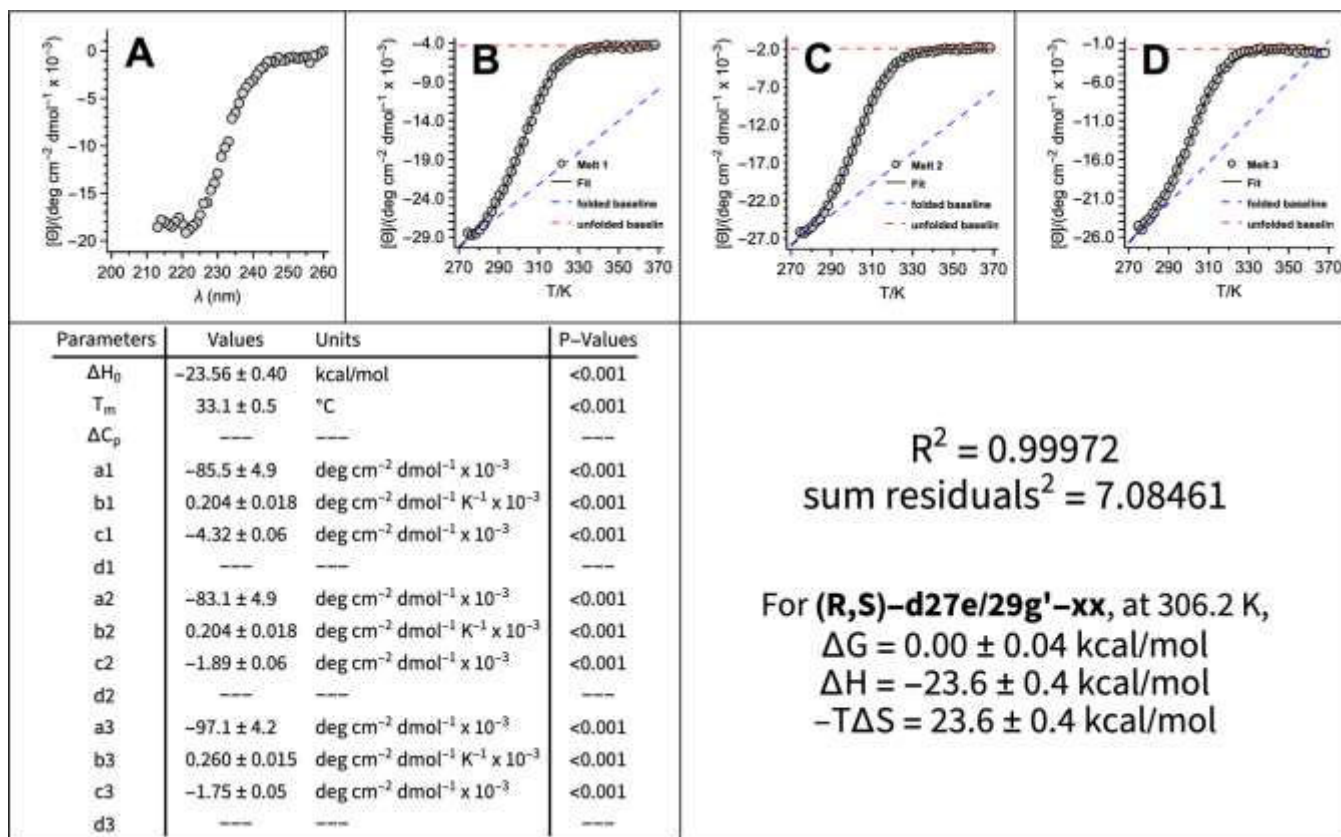

**Figure S145.** (A) CD spectra and (B–D) variable temperature CD data (triplicate) for 15  $\mu\text{M}$  stapled disulfide-bound coiled-coil variant **(R,S)-d27e/29g'-xx** (QX3118) in 20 mM sodium phosphate (pH 7) with 4 M GdnHCl. Fit parameters from equations S1–S3 appear in the table, as do calculated values for  $\Delta G_f$ ,  $\Delta H_f$ , and  $-T\Delta S_f \pm$  standard error at the indicated temperature.

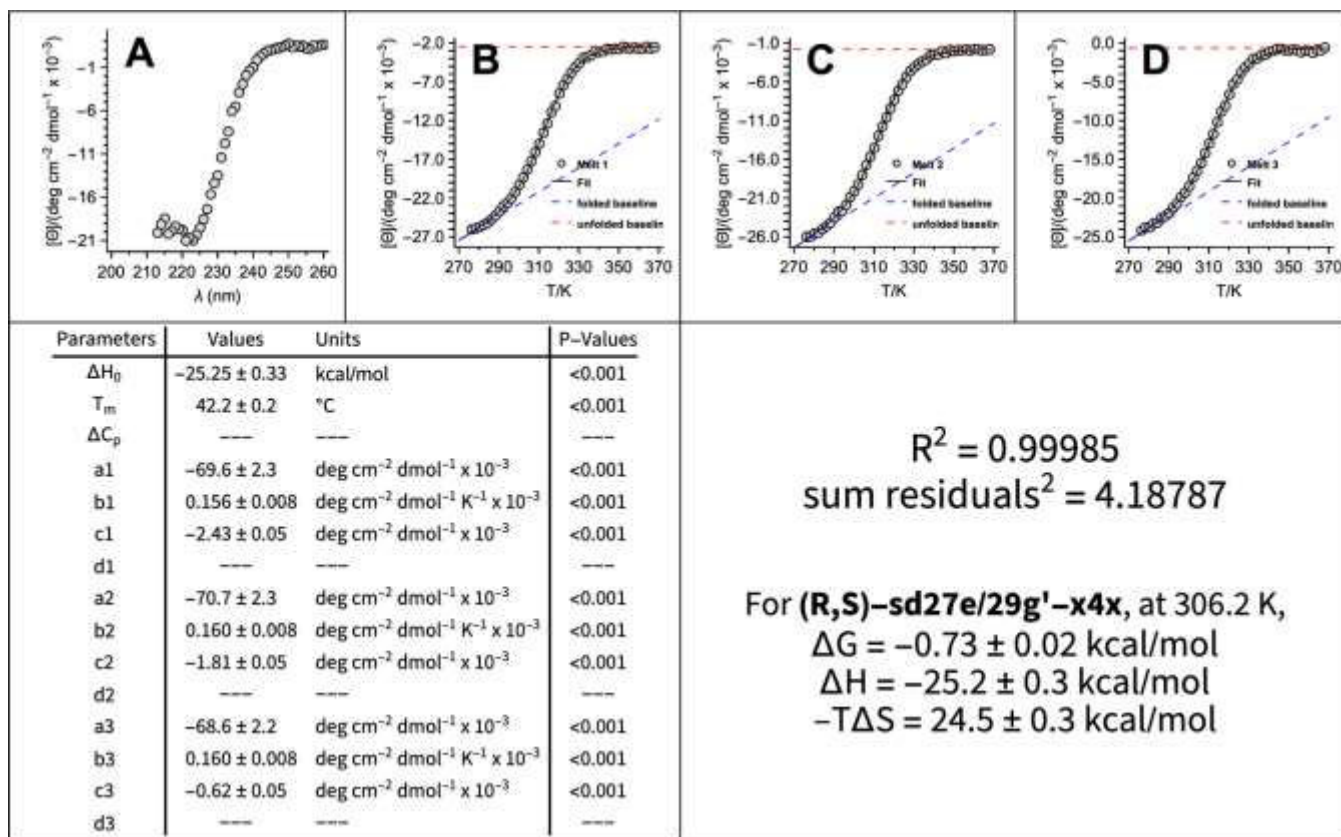

**Figure S146.** (A) CD spectra and (B–D) variable temperature CD data (triplicate) for 15  $\mu\text{M}$  stapled disulfide-bound coiled-coil variant (R,S)-sd27e/29g'-xx (QX3118) in 20 mM sodium phosphate (pH 7) with 4 M GdnHCl. Fit parameters from equations S1–S3 appear in the table, as do calculated values for  $\Delta G_f$ ,  $\Delta H_f$ , and  $-T\Delta S_f \pm$  standard error at the indicated temperature.

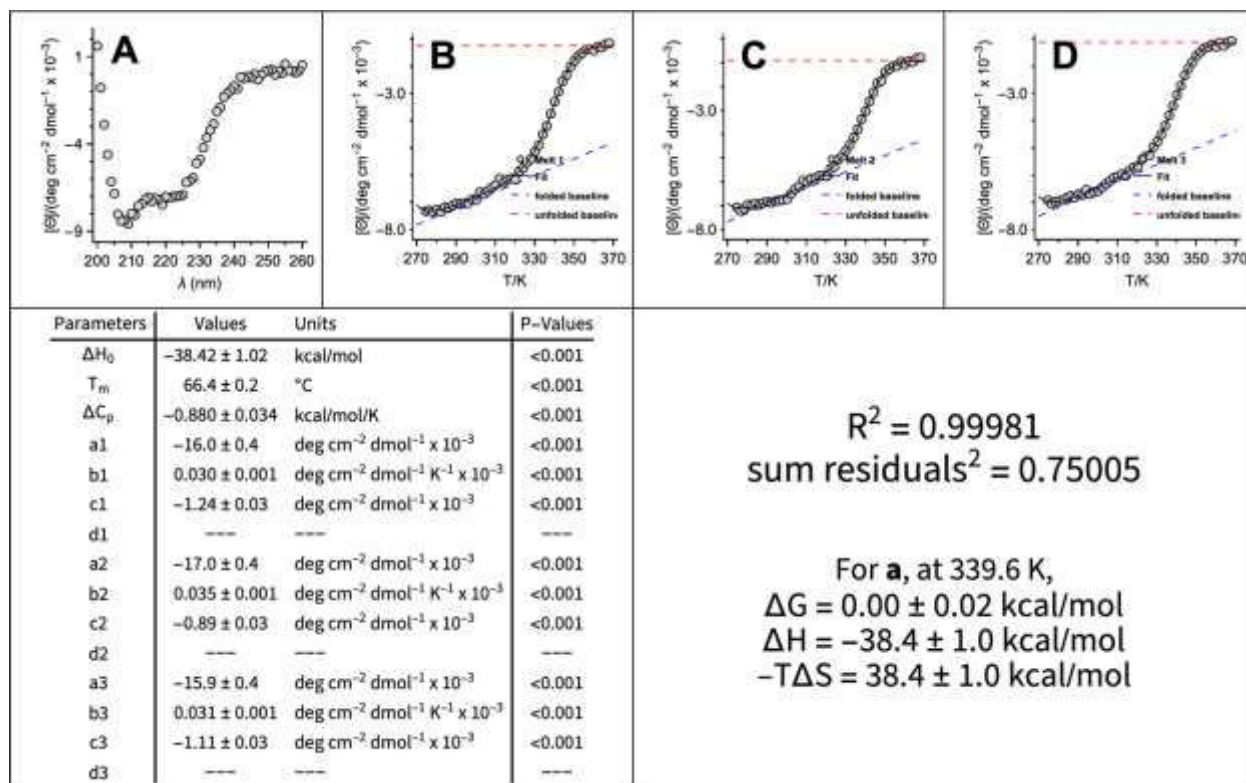

**Figure S147.** (A) CD spectra and (B–D) variable temperature CD data (triplicate) for 15  $\mu\text{M}$  HER2 native affibody variant a (CD1054) in 20 mM sodium phosphate (pH 7). Fit parameters from equations S1–S3 appear in the table, as do calculated values for  $\Delta G_f$ ,  $\Delta H_f$ , and  $-T\Delta S_f \pm$  standard error at the indicated temperature.

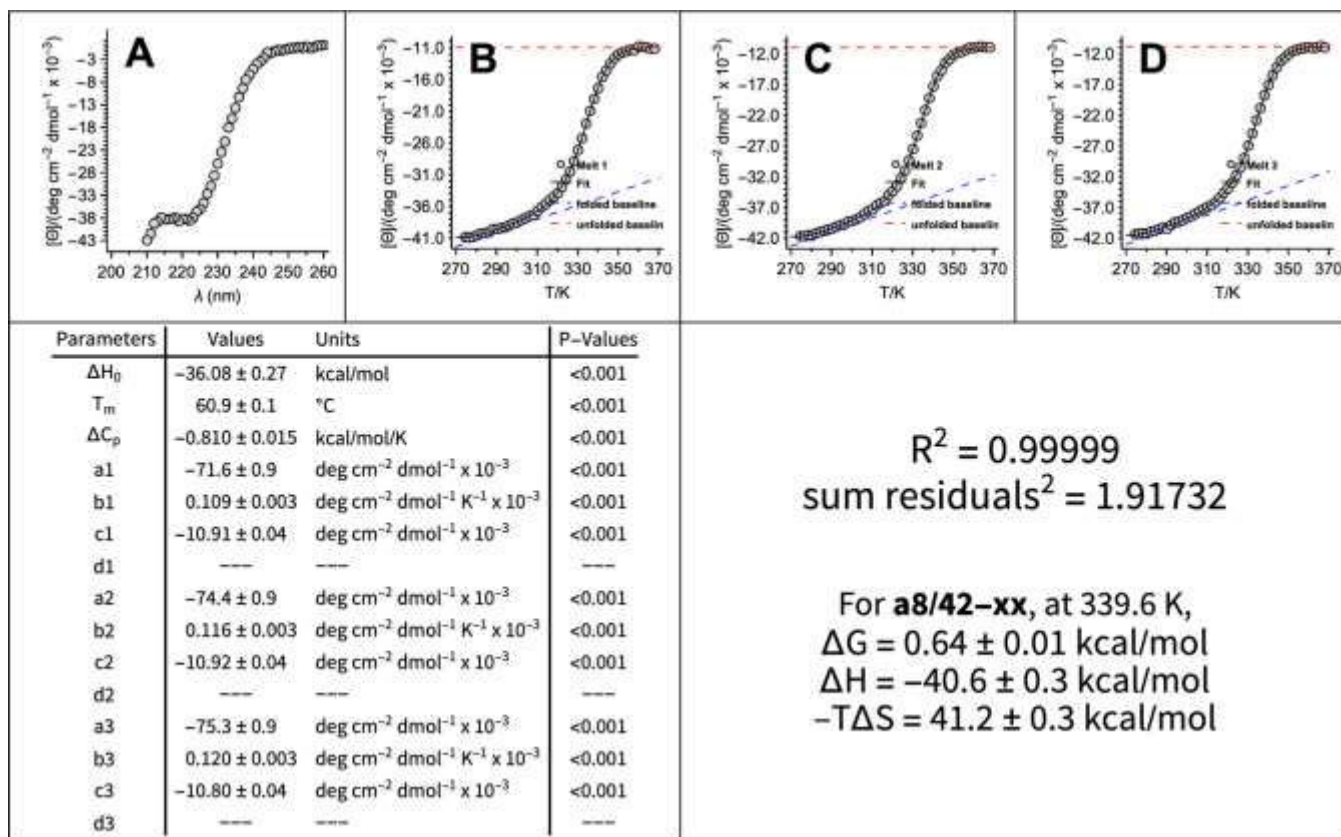

**Figure S148.** (A) CD spectra and (B–D) variable temperature CD data (triplicate) for 15  $\mu\text{M}$  stapled affibody variant **a8/42-xx** (QX3102) in 20 mM sodium phosphate (pH 7). Fit parameters from equations S1–S3 appear in the table, as do calculated values for  $\Delta G_f$ ,  $\Delta H_f$ , and  $-T\Delta S_f \pm$  standard error at the indicated temperature.

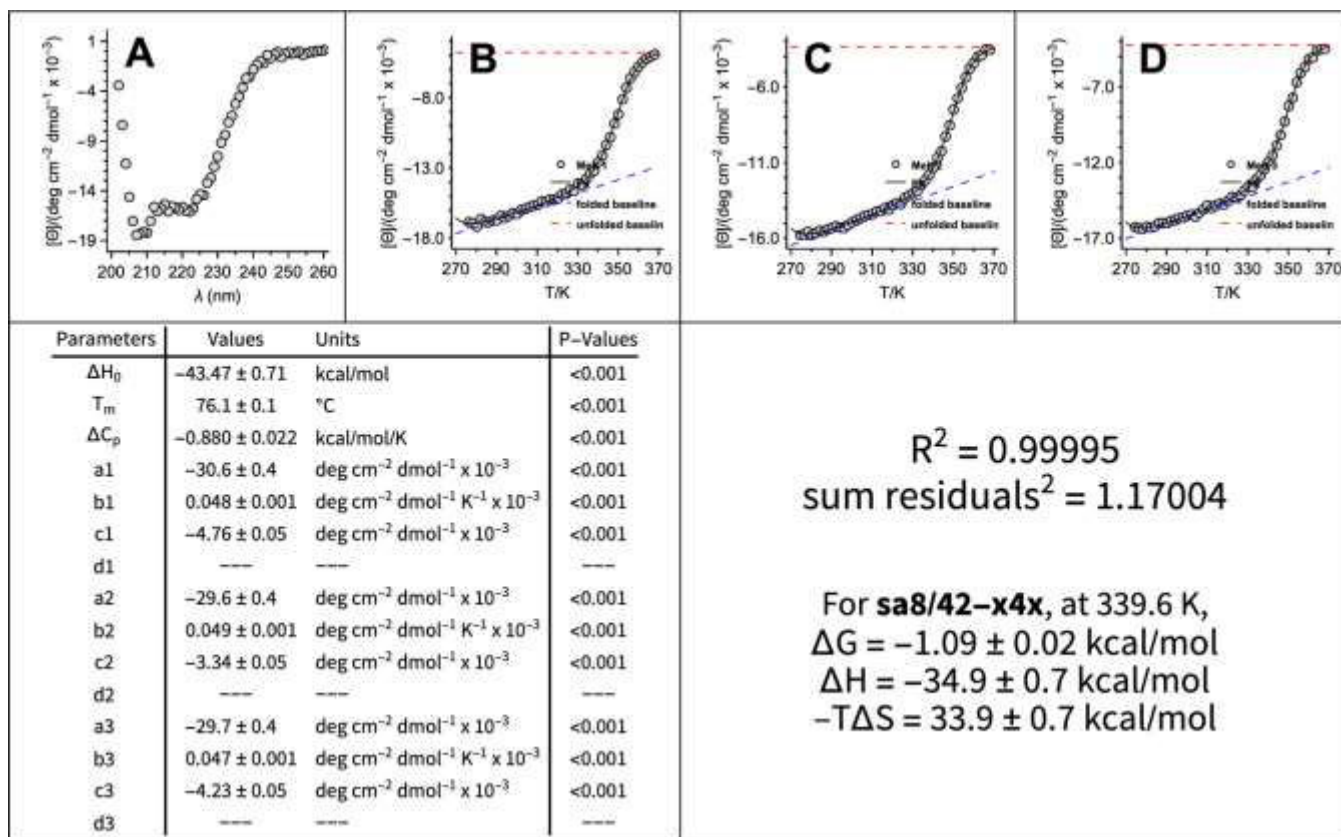

**Figure S149.** (A) CD spectra and (B–D) variable temperature CD data (triplicate) for 15  $\mu\text{M}$  stapled affibody variant **sa8/42-x4x** (QX3106s) in 20 mM sodium phosphate (pH 7). Fit parameters from equations S1–S3 appear in the table, as do calculated values for  $\Delta G_f$ ,  $\Delta H_f$ , and  $-T\Delta S_f \pm$  standard error at the indicated temperature.

## 6. Proteolysis of coiled-coil variants

15  $\mu\text{M}$  protein solutions in 20 mM sodium phosphate buffer (pH 7) were incubated at ambient temperature with 17  $\mu\text{g}/\text{mL}$  proteinase K respectively for up to 5 hours. At each of the several time points, the proteolysis reaction was quenched by adding 40  $\mu\text{L}$  of aqueous trifluoroacetic acid (1% v/v) to 40  $\mu\text{L}$  of the reaction mixture. The quenched mixture was then analyzed in triplicate by reverse phase HPLC analytical column, monitored by a UV-Vis detector at 220 nm. The degradation of the proteins was assessed using the integrated HPLC peak area to account for how much of the full-length protein remained at each time point. The protein half-lives were calculated by fitting the integrated peak areas as a function of time to a mono exponential decay equation:

$$\text{Area}(t) = A \cdot \exp [-kt],$$

where  $t$  is time in minutes,  $A$  is a constant corresponding to relative integrated peak area at  $t = 0$ , and  $\tau$  is the decay time, which is related to the protein half-life  $t_{1/2}$  ( $t_{1/2} = \tau \ln 2$ ). Decay traces for proteins coiled-coil variants, **d27e/29g'-xx** (QX2271); **sd27e/29g'-x4x** (QX2283); **d27e/29g'-z2x** (QX2289); **sd27e/29g'-z2x** (QX2289s); **d24b/25c'-z4x** (QX2291); **sd24b/25c'-z4x** (QX2291s); **d6e/8g'-z4x** (QX2292); **sd6e/8g'-z4x** (QX2292s); **d27e/22g'-z2x** (QX2293); **sd27e/22g'-z2x** (QX2292s); **d27e/22g'-z4x** (QX2294); **sd27e/22g'-z4x** (QX2294s) are shown in Figures S142–S156.

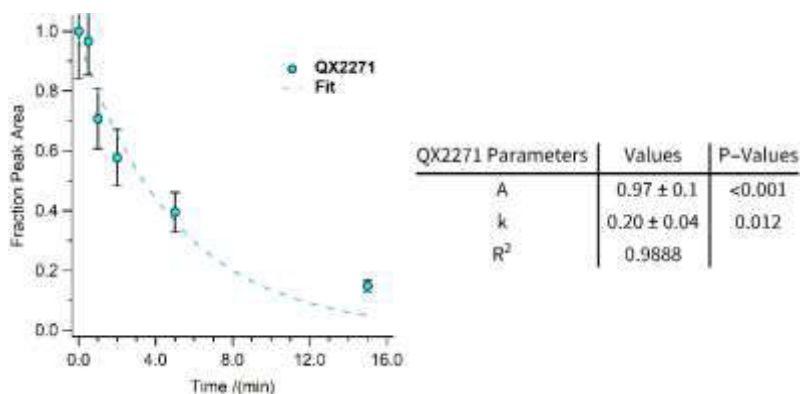

**Figure S150.** Proteolysis of **d27e/29g'-xx** (QX2271) at 50  $\mu\text{M}$  protein concentration in 20 mM sodium phosphate buffer pH 7 by proteinase K (17  $\mu\text{g}/\text{mL}$ ) as monitored by HPLC. Data points are shown as blue circles; each represents the average of three replicate experiments, with error bars representing standard error. The dashed line represents fit of the data to a mono exponential decay function, which was used to calculate the indicated apparent proteolysis rate constant.

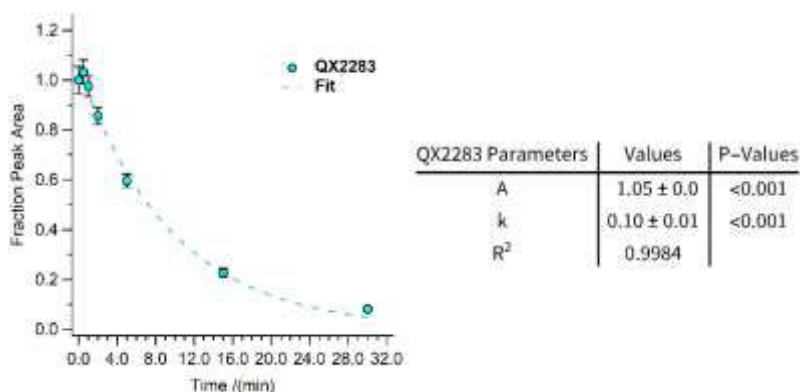

**Figure S151.** Proteolysis of **sd27e/29g'-x4x** (QX2283) at 50  $\mu\text{M}$  protein concentration in 20 mM sodium phosphate buffer pH 7 by proteinase K (17  $\mu\text{g}/\text{mL}$ ) as monitored by HPLC. Data points are shown as blue circles; each represents the average of three replicate experiments, with error bars representing standard error. The dashed line represents fit of the data to a mono exponential decay function, which was used to calculate the indicated apparent proteolysis rate constant.

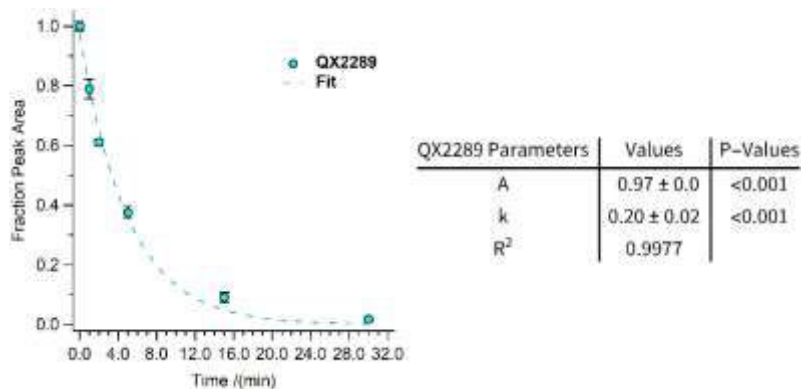

**Figure S152.** Proteolysis of **d27e/29g<sup>1</sup>-z2x** (QX2289) at 50  $\mu$ M protein concentration in 20 mM sodium phosphate buffer pH 7 by proteinase K (17  $\mu$ g/mL) as monitored by HPLC. Data points are shown as blue circles; each represents the average of three replicate experiments, with error bars representing standard error. The dashed line represents fit of the data to a mono exponential decay function, which was used to calculate the indicated apparent proteolysis rate constant.

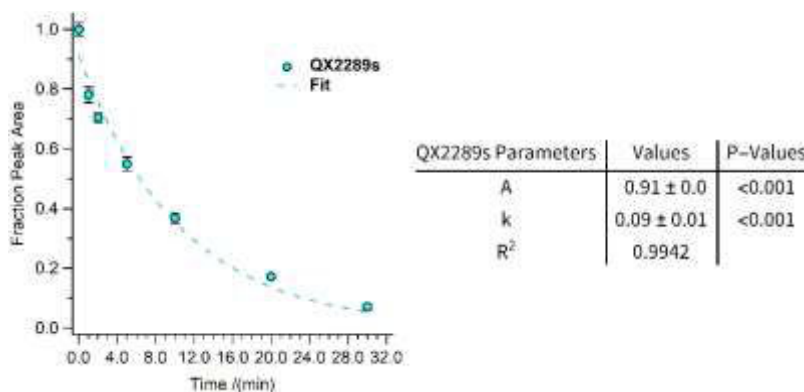

**Figure S153.** Proteolysis of **sd27e/29g<sup>1</sup>-z2x** (QX2289s) at 50  $\mu$ M protein concentration in 20 mM sodium phosphate buffer pH 7 by proteinase K (17  $\mu$ g/mL) as monitored by HPLC. Data points are shown as blue circles; each represents the average of three replicate experiments, with error bars representing standard error. The dashed line represents fit of the data to a mono exponential decay function, which was used to calculate the indicated apparent proteolysis rate constant.

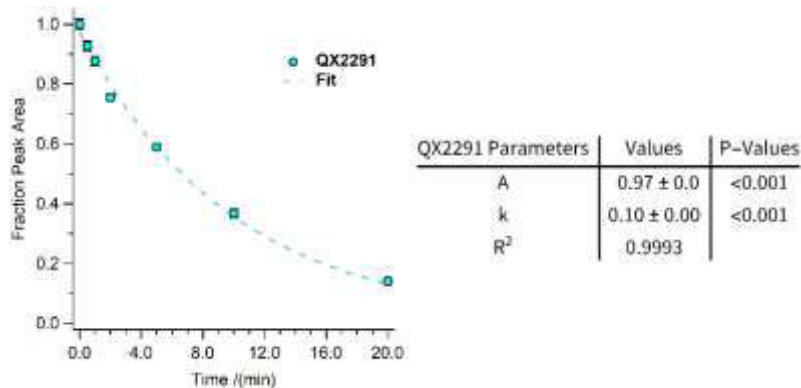

**Figure S154.** Proteolysis of **d24b/25c<sup>1</sup>-z4x** (QX2291) at 50  $\mu$ M protein concentration in 20 mM sodium phosphate buffer pH 7 by proteinase K (17  $\mu$ g/mL) as monitored by HPLC. Data points for are shown as blue circles; each represents the average of three replicate experiments, with error bars representing standard error. The dashed line represents fit of the data to a mono exponential decay function, which was used to calculate the indicated apparent proteolysis rate constant.

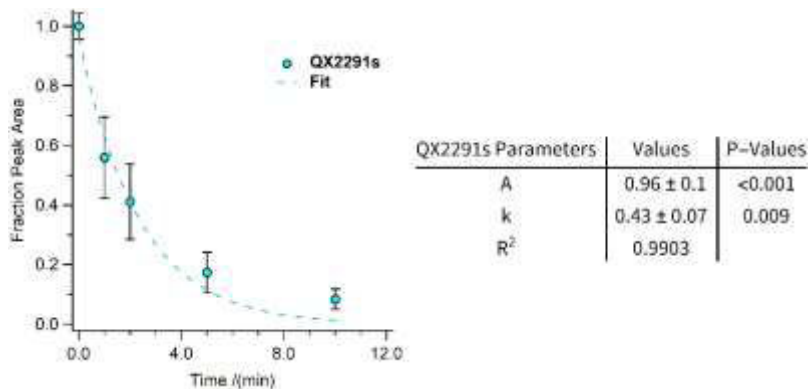

**Figure S155.** Proteolysis of **sd24b/25c'-z4x** (QX2291s) at 50  $\mu$ M protein concentration in 20 mM sodium phosphate buffer pH 7 by proteinase K (17  $\mu$ g/mL) as monitored by HPLC. Data points are shown as blue circles; each represents the average of three replicate experiments, with error bars representing standard error. The dashed line represents fit of the data to a mono exponential decay function, which was used to calculate the indicated apparent proteolysis rate constant.

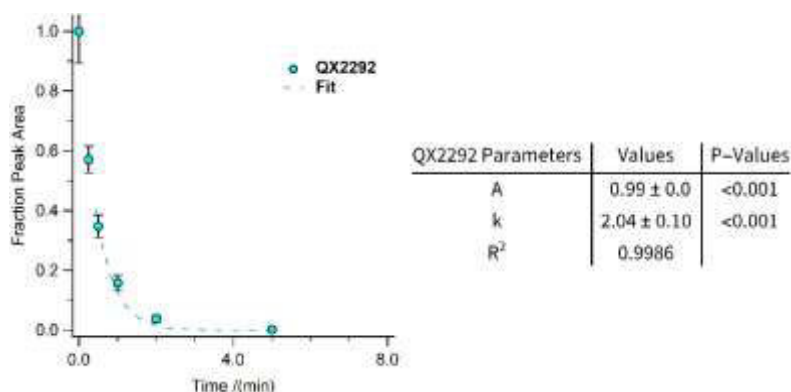

**Figure S156.** Proteolysis of **d6e/8g'-z4x** (QX2292) at 50  $\mu$ M protein concentration in 20 mM sodium phosphate buffer pH 7 by proteinase K (17  $\mu$ g/mL) as monitored by HPLC. Data points are shown as blue circles; each represents the average of three replicate experiments, with error bars representing standard error. The dashed line represents fit of the data to a mono exponential decay function, which was used to calculate the indicated apparent proteolysis rate constant.

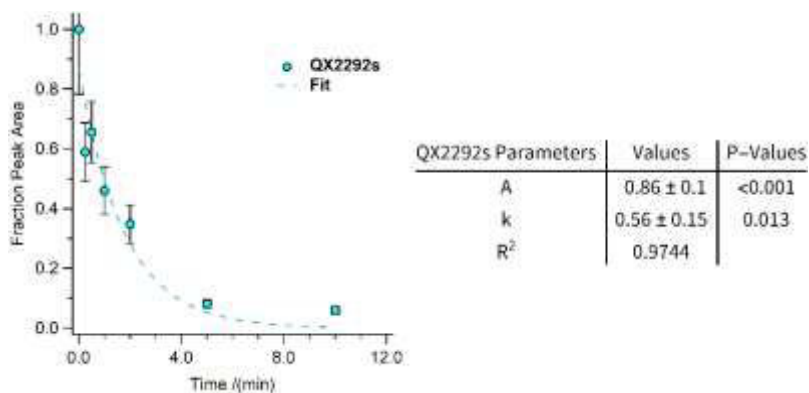

**Figure S157.** Proteolysis of **sd6e/8g'-z4x** (QX2292s) at 50  $\mu$ M protein concentration in 20 mM sodium phosphate buffer pH 7 by proteinase K (17  $\mu$ g/mL) as monitored by HPLC. Data points are shown as blue circles; each represents the average of three replicate experiments, with error bars representing standard error. The dashed line represents fit of the data to a mono exponential decay function, which was used to calculate the indicated apparent proteolysis rate constant.



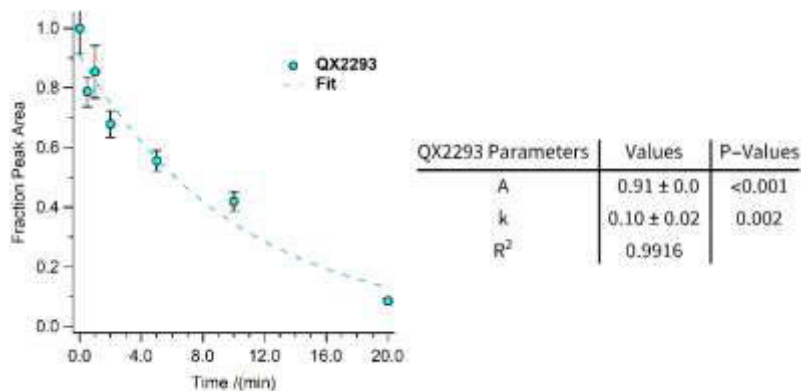

**Figure S158.** Proteolysis of **d27e/22g'-z2x** (QX2293) at 50  $\mu$ M protein concentration in 20 mM sodium phosphate buffer pH 7 by proteinase K (17  $\mu$ g/mL) as monitored by HPLC. Data points are shown as blue circles; each represents the average of three replicate experiments, with error bars representing standard error. The dashed line represents fit of the data to a mono exponential decay function, which was used to calculate the indicated apparent proteolysis rate constant.

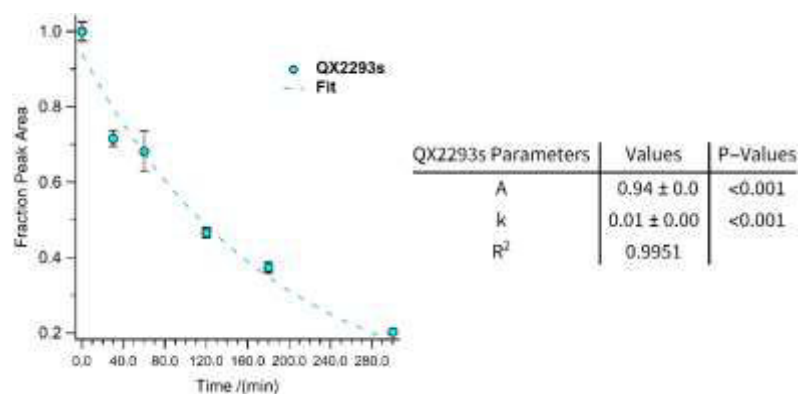

**Figure S159.** Proteolysis of **sd27e/22g'-z2x** (QX2293s) at 50  $\mu$ M protein concentration in 20 mM sodium phosphate buffer pH 7 by proteinase K (17  $\mu$ g/mL) as monitored by HPLC. Data points are shown as blue circles; each represents the average of three replicate experiments, with error bars representing standard error. The dashed line represents fit of the data to a mono exponential decay function, which was used to calculate the indicated apparent proteolysis rate constant.

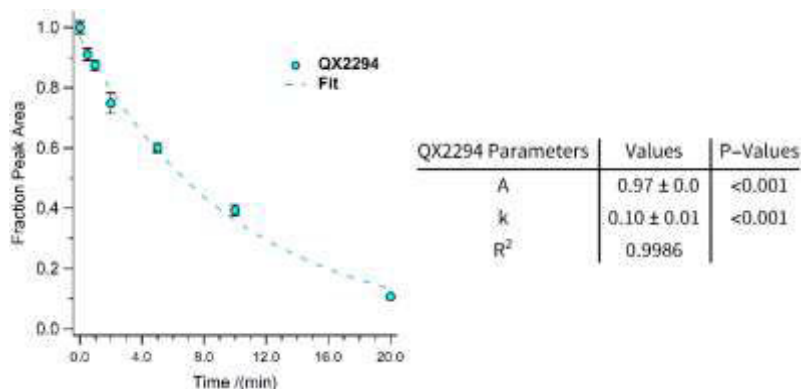

**Figure S160.** Proteolysis of **d27e/22g'-z4x** (QX2294) at 50  $\mu$ M protein concentration in 20 mM sodium phosphate buffer pH 7 by proteinase K (17  $\mu$ g/mL) as monitored by HPLC. Data points are shown as blue circles; each represents the average of three replicate experiments, with error bars representing standard error. The dashed line represents fit of the data to a mono exponential decay function, which was used to calculate the indicated apparent proteolysis rate constant.

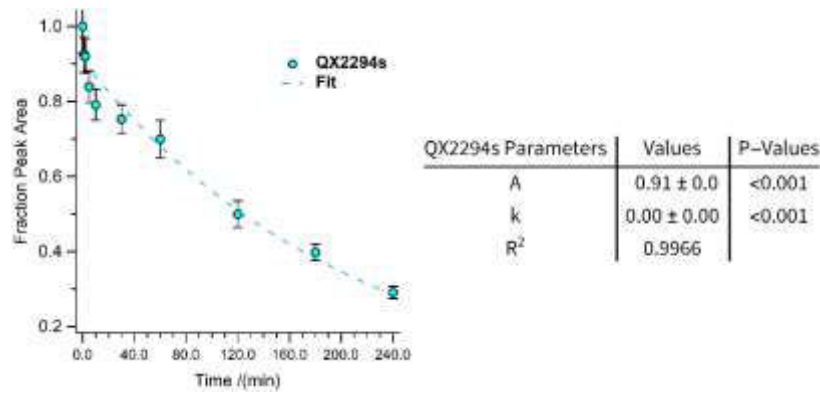

**Figure S161.** Proteolysis of **sd27e/22g<sup>3</sup>-z4x** (QX2294s) at 50  $\mu\text{M}$  protein concentration in 20 mM sodium phosphate buffer pH 7 by proteinase K (17  $\mu\text{g}/\text{mL}$ ) as monitored by HPLC. Data points are shown as blue circles; each represents the average of three replicate experiments, with error bars representing standard error. The dashed line represents fit of the data to a mono exponential decay function, which was used to calculate the indicated apparent proteolysis rate constant.

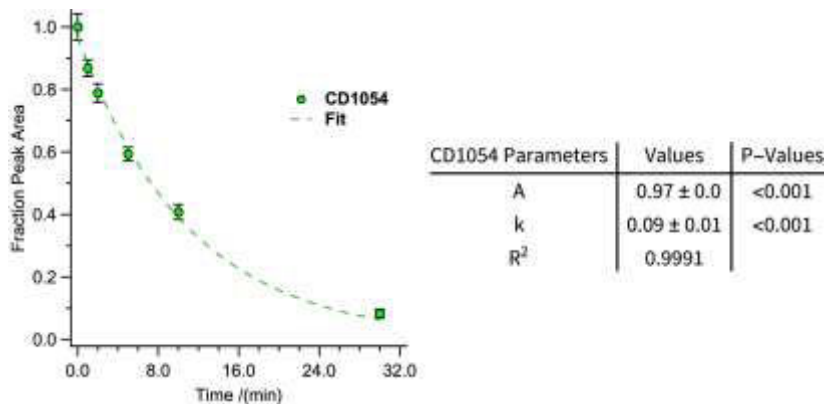

**Figure S162.** Proteolysis of native HER2 affibody **a** (CD1054) at 15  $\mu\text{M}$  protein concentration in 20 mM sodium phosphate buffer pH 7 by proteinase K (17  $\mu\text{g}/\text{mL}$ ) as monitored by HPLC. Data points are shown as green circles; each represents the average of three replicate experiments, with error bars representing standard error. The dashed line represents fit of the data to a mono exponential decay function, which was used to calculate the indicated apparent proteolysis rate constant.

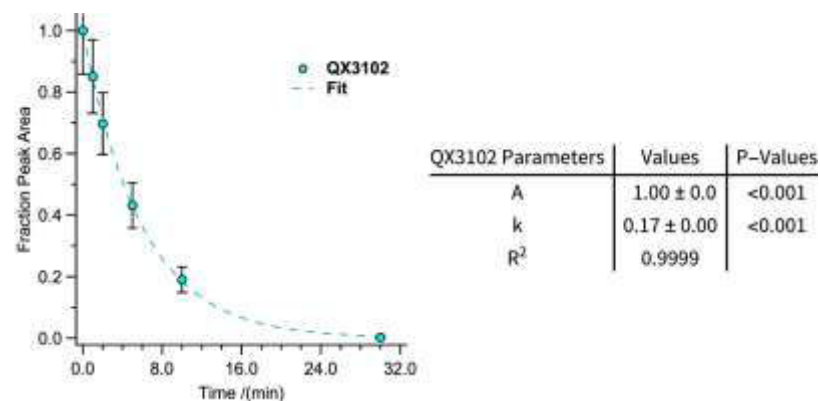

**Figure S163.** Proteolysis of **a8/42-xx** (QX3102) at 15  $\mu\text{M}$  protein concentration in 20 mM sodium phosphate buffer pH 7 by proteinase K (17  $\mu\text{g}/\text{mL}$ ) as monitored by HPLC. Data points are shown as blue circles; each represents the average of three replicate experiments, with error bars representing standard error. The dashed line represents fit of the data to a mono exponential decay function, which was used to calculate the indicated apparent proteolysis rate constant.

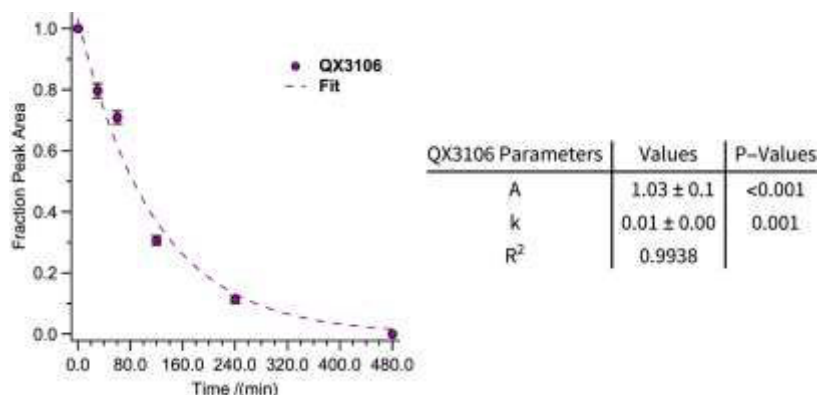

**Figure S164.** Proteolysis of **sa8/42-x4x** (QX3106) at 15  $\mu\text{M}$  protein concentration in 20 mM sodium phosphate buffer pH 7 by proteinase K (17  $\mu\text{g}/\text{mL}$ ) as monitored by HPLC. Data points are shown as dark magenta circles; each represents the average of three replicate experiments, with error bars representing standard error. The dashed line represents fit of the data to a mono exponential decay function, which was used to calculate the indicated apparent proteolysis rate constant.

## 7. Fluorescence polarization binding assay

Fluorescent affibody solutions of peptides **fa** (ZJ10611), **fa8/42-xx** (ZJ10612), and **fa8/42-x4x** (ZJ1062), with concentrations of 247  $\mu\text{M}$ , 263  $\mu\text{M}$ , and 57  $\mu\text{M}$ , respectively, were diluted with phosphate buffer (pH 7.4) to 100 nM. The His-tagged recombinant HER2/ERBB2 extracellular domain (hereafter called the HER2 protein) was obtained from SinoBiological and prepared at a concentration of 2.7  $\mu\text{M}$ . We performed direct binding fluorescence polarization assays using a constant concentration of fluorescent affibody against varying concentrations of the recombinant HER2 extra-cellular domain. We prepared the fluorescent affibody solution in a glass tube with 4970  $\mu\text{L}$  of PBS solution, 25  $\mu\text{L}$   $\beta$ -casein blocking agent (final concentration 0.1 mg/mL) and 5  $\mu\text{L}$  of fluorescent affibody stock solution (100 nM), yielding a final affibody concentration of 100 pM. The glass tube containing the fluorescent affibody stock solution was inverted several times gently to mix. We aliquoted 200  $\mu\text{L}$  of fluorescent affibody solution into each well of a 96-well plate and then added varying concentrations of the HER2 protein via serial dilution as follows: To the first well of the dilution series, we added an additional 190  $\mu\text{L}$  of fluorescent affibody solution along with 10  $\mu\text{L}$  of a 2.7  $\mu\text{M}$  solution of the HER2 protein, bringing the total volume in the first well to 400  $\mu\text{L}$ , such that the concentration of the HER2 protein in the first well was 65 nM. We then transferred 200  $\mu\text{L}$  of the solution from the first well into the second well, leading to a two-fold dilution of the HER2 protein. We continued this dilution series by transferring 200  $\mu\text{L}$  from well to well to generate a total of 19 different concentrations of HER2 protein, with the lowest concentration at 0.124 pM. Three 60  $\mu\text{L}$  aliquots from each well were then transferred to a 384-well plate. We allowed 30 minutes for equilibration and measured the fluorescence polarization in each well using a Biotek Synergy Neo microplate reader with fluorescent polarization filters #4 (Dual FP) and #65 (FP 485/530, FP 530/590). We averaged the fluorescence polarization for these three replicate wells at each concentration of HER2 protein. We repeated this experiment for each affibody variant a total of three times on separate occasions. Data for **fa** (ZJ10611), **fa8/42-xx** (ZJ10612), and **fa8/42-x4x** (ZJ1062) are shown in Figures S165-167. The data for the native variant **fa** were too noisy to justify further analysis. However, we fit the data for variant **fa8/42-xx** and its stapled counterpart **fa8/42-x4x** to the following equation:

$$P = \frac{B_n \cdot [\text{affibody}]}{K_d + [\text{affibody}]}, \quad (\text{S4})$$

where P is fluorescence polarization, [affibody] is the concentration of fluorescent affibody in M;  $B_n$  is the maximum fluorescence polarization ( $B_1$  for replicate 1;  $B_2$  for replicate 2;  $B_3$  for replicate 3);  $K_d$  is the dissociation constant in M for binding of the fluorescent affibody to the HER2 protein.  $K_d$  values, fit parameters, and statistics appear in Figure S166–S167.

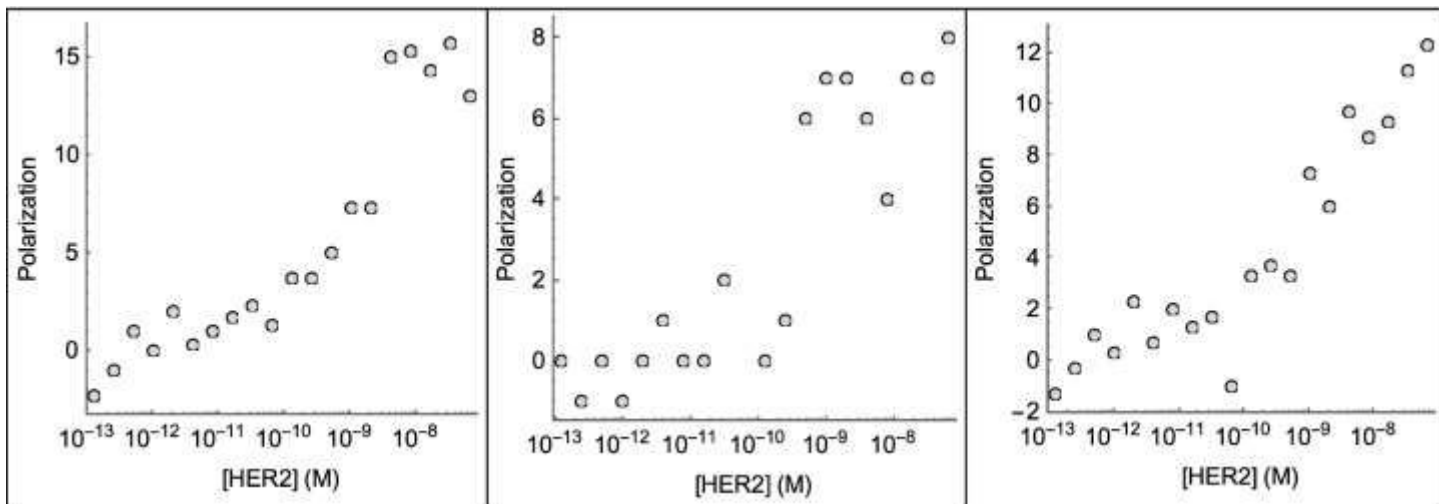

**Figure S165.** Fluorescence polarization data of native fluorescent affibody **fa** (ZJ10611) at 100 pM in PBS with varying concentrations of the HER2 protein. Data points are shown as grey circles; each represents the average of three wells; the three panels represent replicate data collected on three separate occasions.

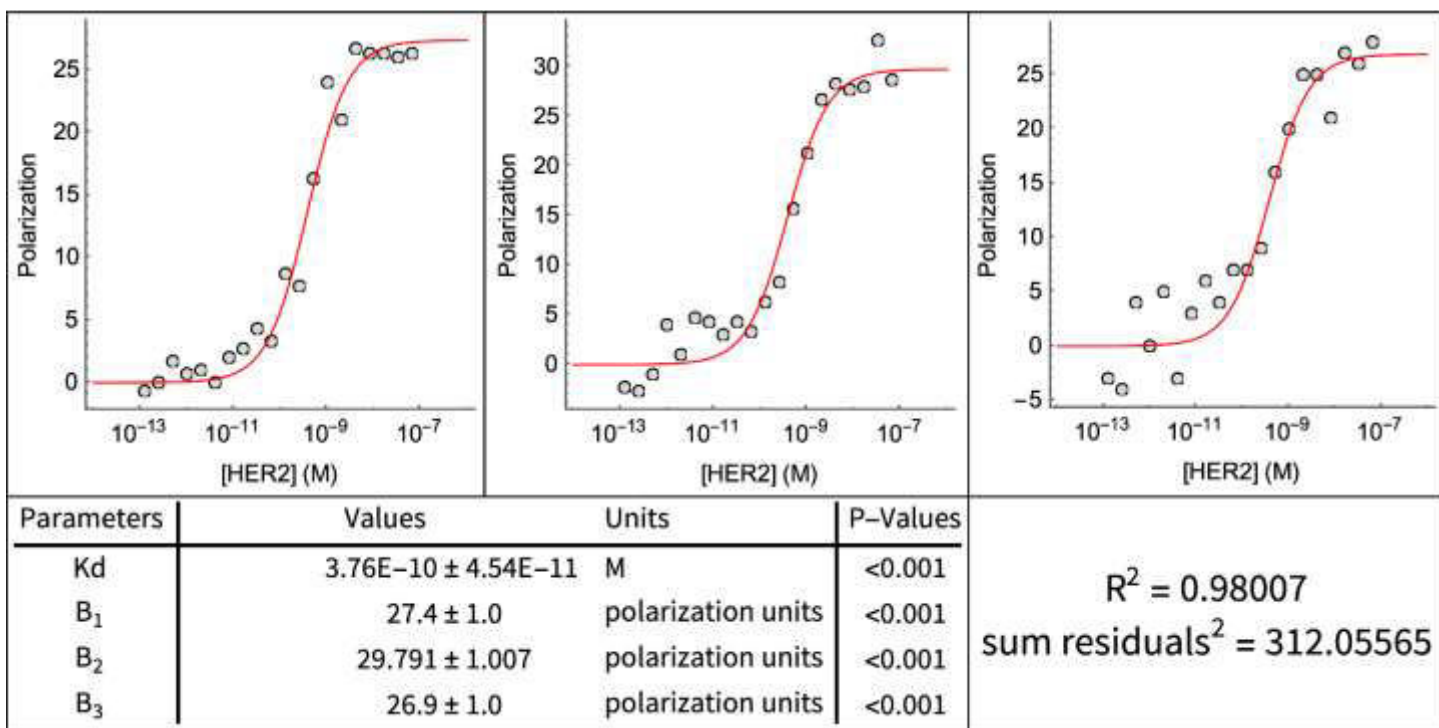

**Figure S166.** Fluorescence polarization data for unstapled affibody **fa8/42-xx** (ZJ10612) at 100 pM in PBS with varying concentrations of the HER2 protein. Data points are shown as grey circles; each represents the average of three wells; the three panels represent replicate data collected on three separate occasions. The red line represents fit of the data to a binding curve given by equation S4.

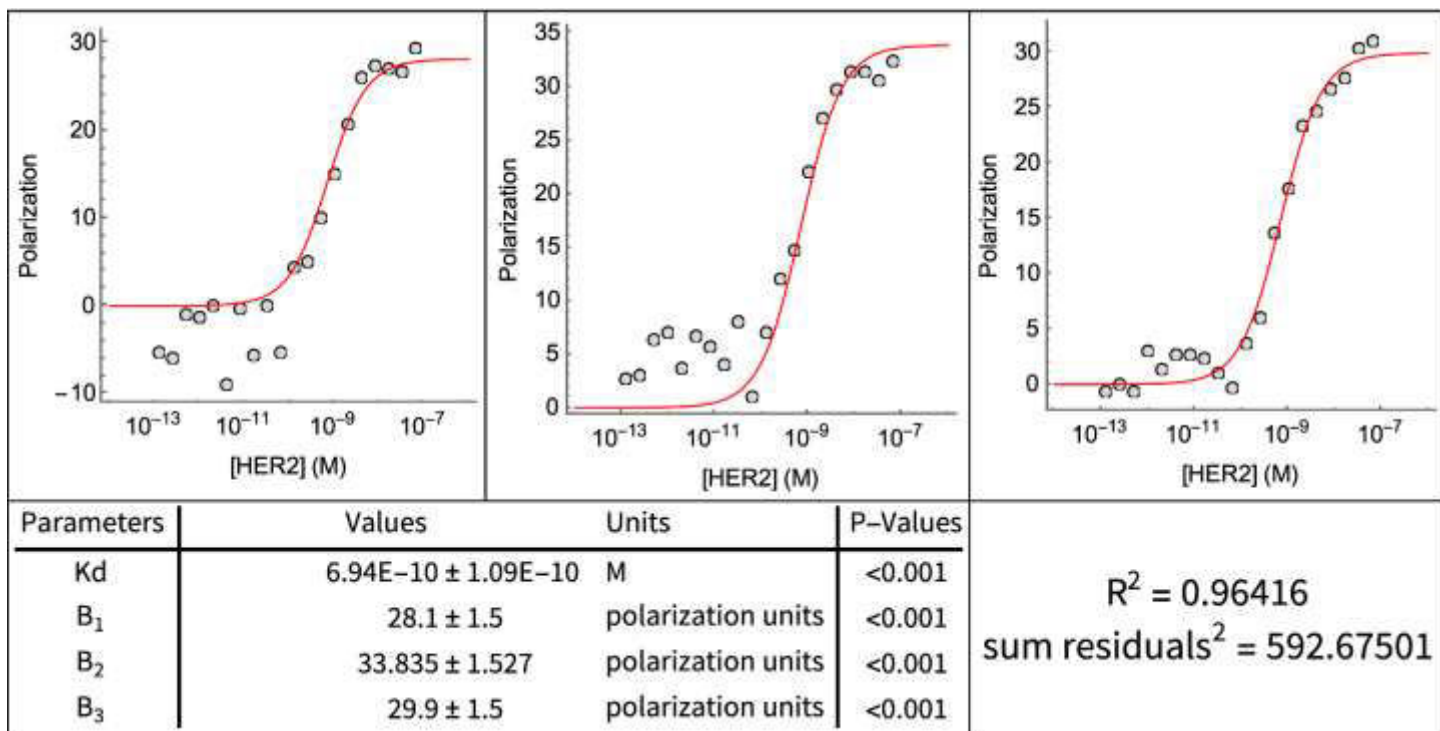

**Figure S167.** Fluorescence polarization data of stapled affibody **fa8/42-x4x (ZJ1062)** at 100 pM protein concentration in PBS. Data points are shown as grey circles; each represents the average of three wells; the three panels represent replicate data collected on three separate occasions. The red line represents fit of the data to a binding curve given by equation S4.

## 8. Stapling between heterochiral residues

For monomeric helical peptide stapling crossing one helical turn or two, application of heterochiral residues can further enhance the stabilizing effect from stapling on  $\alpha$ -helices, since the heterochiral residues are oriented toward to each other, adopting a more favorable geometry for crosslinking. The favorable geometry derived from the heterochiral residues has been applied to disulfide-bond-based stapling<sup>4, 5</sup> and metathesis-based stapling<sup>6, 7</sup> on monomeric helical peptides. We found that both the residue 27e and 29g' are oriented toward the same N-terminus direction of the coiled-coil heterodimer from the crystal structure. We wondered whether heterochiral residues at position 27e and 29g' will be more favorable for interhelical PEG stapling. Accordingly, we incorporated D-propargylglycine at e-position 27 on the acidic monomer, and L-propargylglycine at g-position 29' on the basic monomer to get heterodimer (*R,S*)-**d27e/29g'-xx** and its stapled counterpart (*R,S*)-**sd27e/29g'-x4x**. The stapled variant (*R,S*)-**d27e/29g'-xx** is  $-0.73 \pm 0.04$  kcal/mol more stable than its non-stapled counterpart (*R,S*)-**d27e/29g'-xx**, which is similar to that of the difference between **d27e/29g'-xx** vs. **sd27e/29g'-x4x**, in which L-propargylglycine was incorporated at both position 27e and 29g', indicating that stapling between residues of opposite chirality residues dose not contribute much stabilization to the impact of interhelical PEG stapling.

## 9. Synthesis and Characterization of PEGylated Asparagine Derivatives, bis-azido PEG, branched Y-shaped bis-azido PEG

Oxybis(ethane-2,1-diyl) dimethanesulfonate (QX2227)

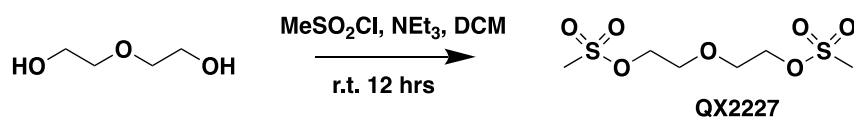

Methanesulfonyl chloride (14.3 g, 125 mmol) was added dropwise to a stirred solution of 2,2'-oxybis(ethan-1-ol) (5.3 g, 50 mmol) and triethyl amine (15.2 g, 150 mmol) in dichloromethane (200 mL) at 0 °C. After the

addition was complete, the resulting mixture was stirred at r.t. for 12 hrs. Water was added to quench the reaction. The organic phase was separated, and the aqueous phase was extracted with dichloromethane ( $2 \times 100$  mL). The combined organic layers were washed with brine ( $3 \times 100$  mL), dried with anhydrous sodium sulfate, filtered, and the solvent was removed by rotary evaporation to afford 13.1 g of colorless oil, which was used in the next step without purification. Yield quantitative. MS(ESI-TOF)  $m/z$  calc. for  $C_6H_{15}O_7S_2^+$  263.03, found 263.02  $[M+H^+]$ ; calc. for  $C_6H_{18}NO_7S_2^+$  280.05, found 280.05  $[M+NH_4^+]$ .

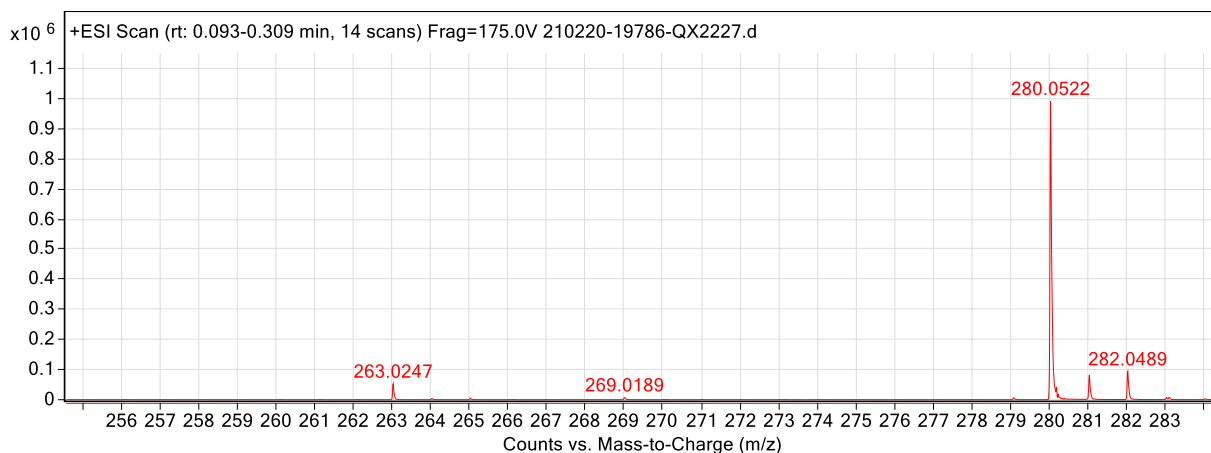

**Figure S168.** ESI-TOF MS data for QX2227.

1-Azido-2-(2-azidoethoxy)ethane (QX2228)

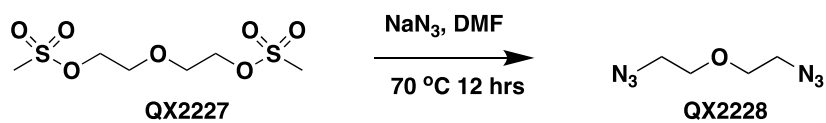

To a solution of  $NaN_3$  (9.7 g, 150 mmol) in DMF (200 mL) was added QX2227 (13.1 g, 50 mmol) at room temperature. The reaction mixture was heated to  $70\text{ }^\circ\text{C}$  and stirred for 12 hours. The crude mixture was diluted with 400 mL of water and extracted with DCM (200 mL) for 3 times. The combined organic phases were washed with saturated brine and dried over anhydrous sodium sulfate, filtered, and the solvent was removed by rotary evaporation to afford 8.32 g of yellow oil. Yield quantitative. The crude product was used in the next step without further purification. The product was confirmed by Crude NMR:  $^1\text{H-NMR}$  (300 MHz, Chloroform- $d$ )  $\delta$  3.71 (t,  $J = 4.8$  Hz, 4H), 3.44 (t,  $J = 4.8$  Hz, 4H).  $^{13}\text{C-NMR}$  (126 MHz, Chloroform- $d$ )  $\delta$  70.10, 50.76.

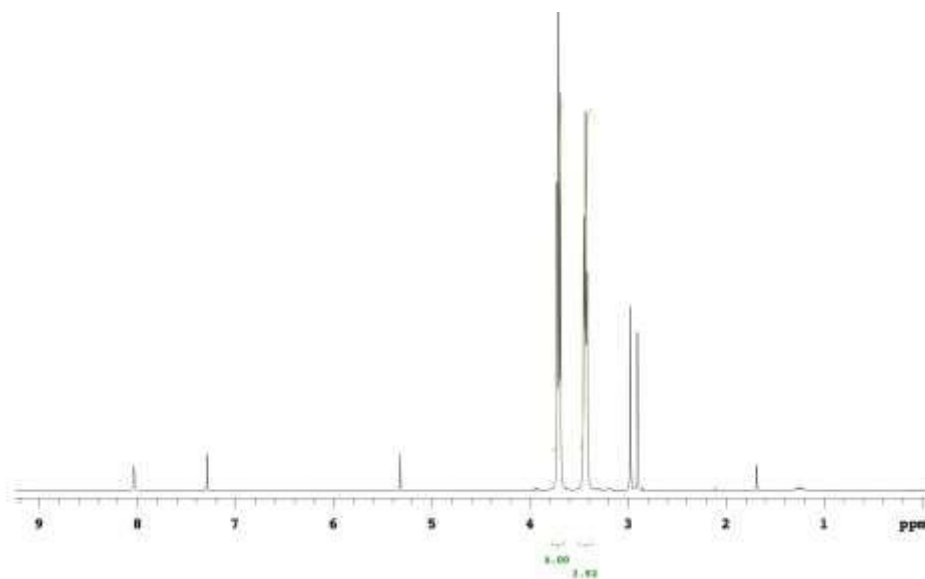

Figure S169.  $^1\text{H}$  NMR data for QX2228.

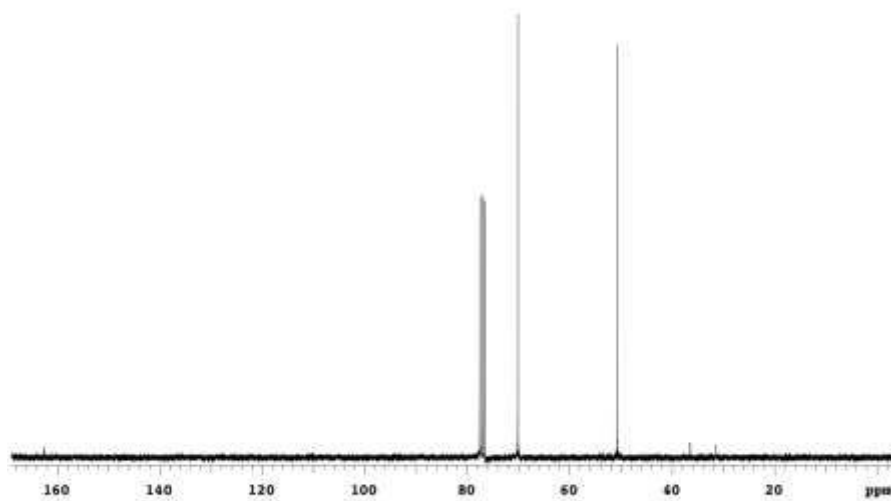

Figure S170.  $^{13}\text{C}$  NMR data for QX2228.

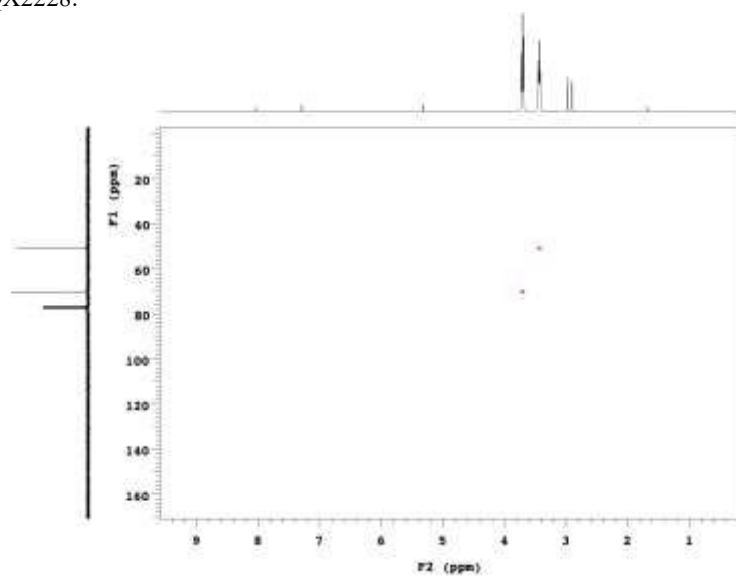

Figure S171. HSQC data for QX2228.

2-(2-Azidoethoxy)ethan-1-amine (QX2229)

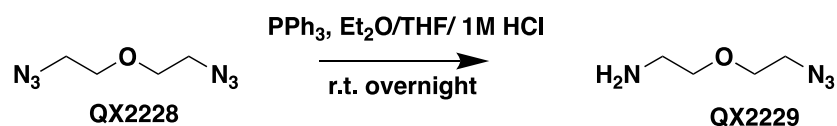

Triphenylphosphine (11 g, 45 mmol, 0.9 eq.) dissolved in ether (80 mL) was added to a solution of QX2228 (8.32 g, 50 mmol) in Ether/THF/ 1M aqueous HCl (50 mL/100 mL/50mL). Addition was performed over a period of 3 hours at room temperature and the reaction was stirred overnight. Phases were separated by a separation funnel and the organic layer was washed with 4M HCl aqueous solution. The combined aqueous layer was adjusted to pH 14 with sodium hydroxide powder. Product was then extracted with DCM (3 × 80 mL). Combined organic layer was dried over anhydrous sodium sulfate and filtered. After removal of the solvent under reduced pressure, a yellow oil was afforded (4.3 g, yield 66%), which was used in the next step without purification. MS(ESI-TOF)  $m/z$  calc. for  $\text{C}_4\text{H}_{11}\text{N}_4\text{O}^+$  131.09, found 131.09  $[\text{M}+\text{H}^+]$ .

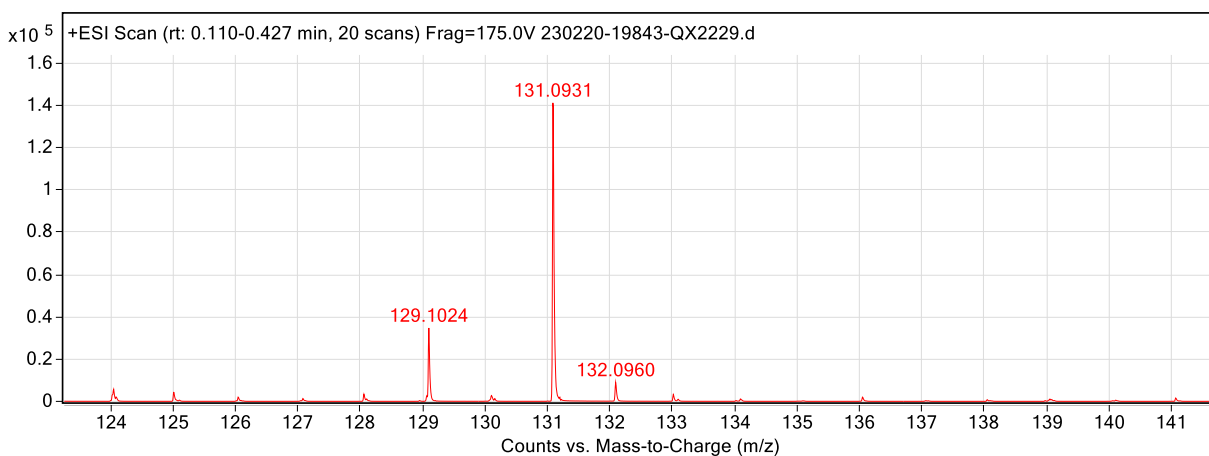

Figure S172. ESI-TOF MS data for QX2229.





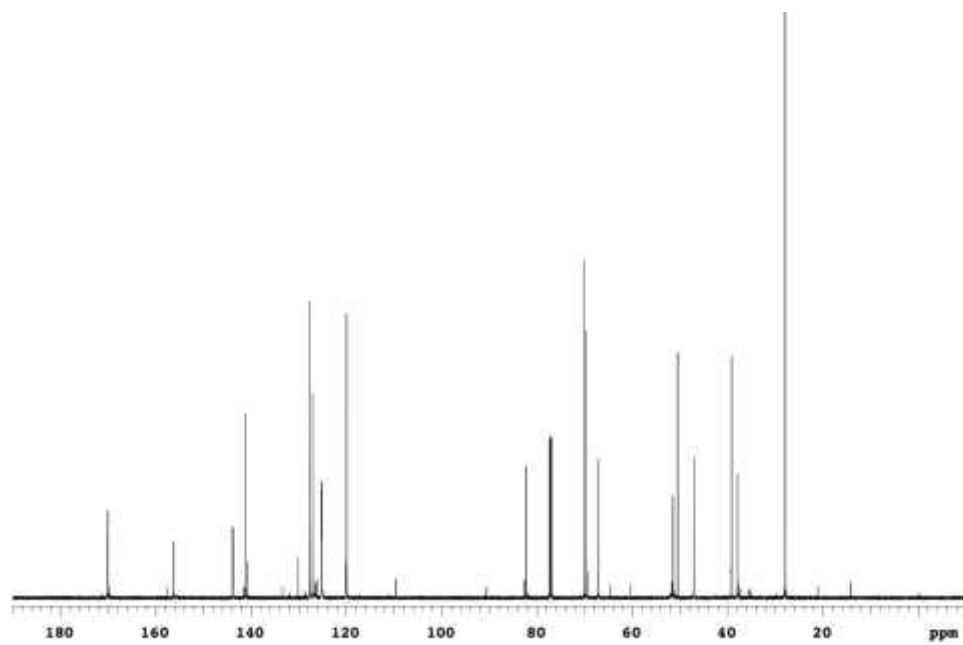

Figure S175.  $^{13}\text{C}$  NMR data for QX2230.

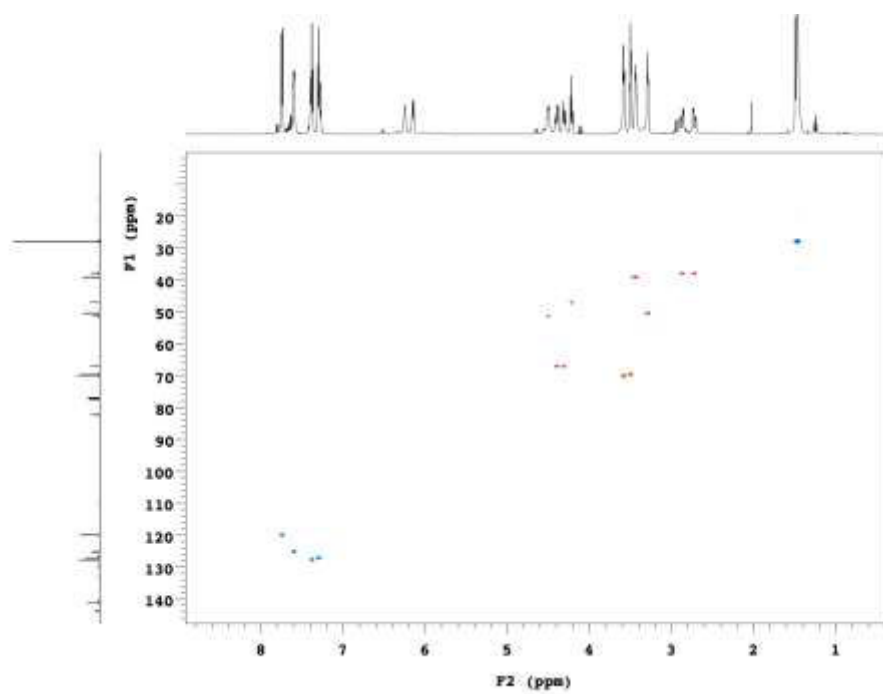

Figure S176. HSQC data for QX2230.

N<sup>2</sup>-(((9H-fluoren-9-yl)methoxy)carbonyl)-N<sup>4</sup>-(2-(2-azidoethoxy)ethyl)-L-asparagine (QX2232)

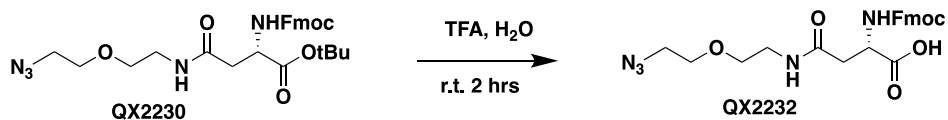

Compound QX2230 (1.0 g, 1.9 mmol) was dissolved in a mixture of TFA (3 ml) and water (150  $\mu$ L). Then the reaction mixture was stirred at room temperature for 2 hours. After completion of the reaction, TFA and water were removed by rotary evaporation. Yield quantitative. The crude was used directly for peptide synthesis without purification. MS(ESI-TOF)  $m/z$  calc. for C<sub>23</sub>H<sub>27</sub>N<sub>5</sub>O<sub>6</sub><sup>+</sup> 469.20, found 469.19 [M+H<sup>+</sup>].

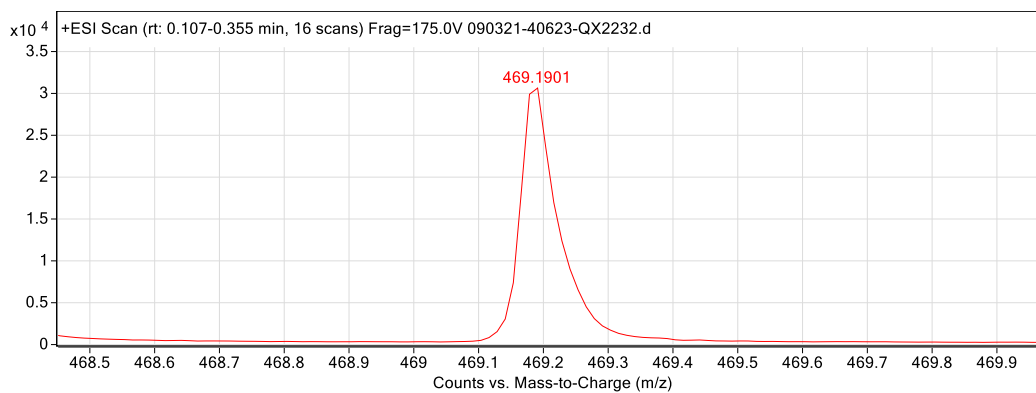

Figure S177. ESI-TOF MS data for QX2232.

2,5-Dioxopyrrolidin-1-yl (2,5,8,11-tetraoxatridecan-13-yl) carbonate (QX3065)

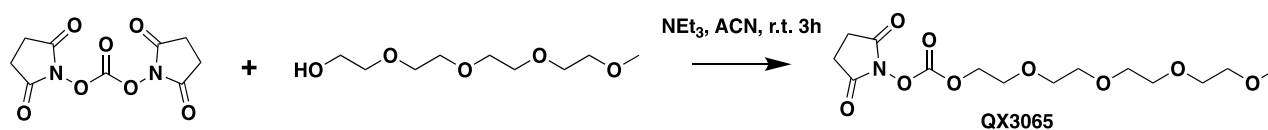

To a solution of 2,5,8,11-tetraoxatridecan-13-ol (2.08 g, 10 mmol), and bis(2,5-dioxopyrrolidin-1-yl) carbonate (3.84 g, 15 mmol), was added 4.16 mL (30 mmol) TEA. The resulting solution was stirred at r.t. for 3 hours. After the reaction was completed, monitored by TLC, the ACN solvent was removed and 100 mL DCM was added. Then the solution was washed with 5% sodium bicarbonate (50 mL  $\times$  3) then with water (50 mL  $\times$  2). The organic layer was then dried over sodium sulfate, filtered, and evaporated with reduced pressure to give us the crude product as colorless oil. Yield quantitative. The crude was used in the next step without purification. MS(ESI-TOF)  $m/z$  calc. for  $C_{14}H_{24}NO_9^+$  350.14, found 350.15  $[M+H^+]$ ; calc. for  $C_{14}H_{27}N_2O_9^+$  367.17, found 367.17  $[M+NH_4^+]$ .

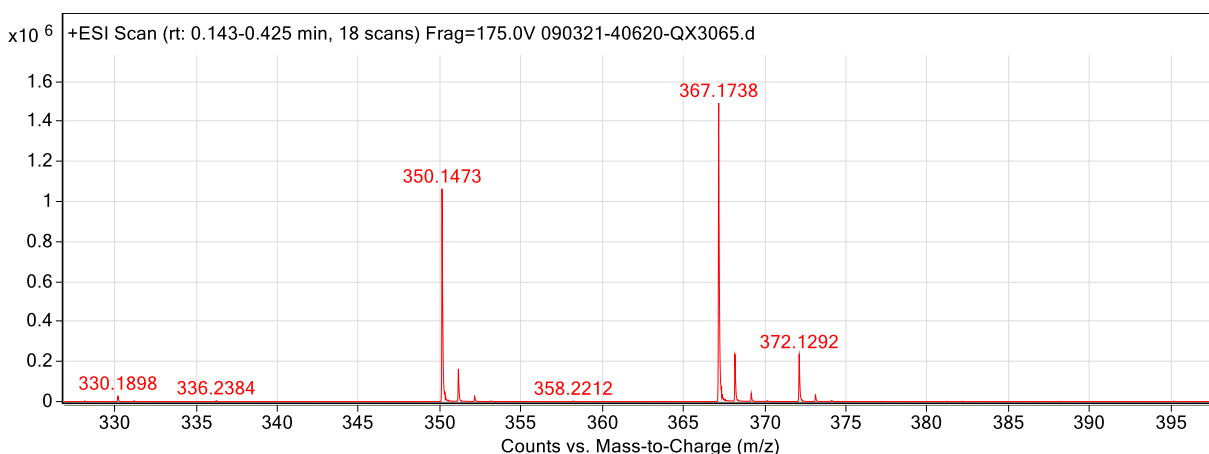

Figure S178. ESI-TOF MS data for QX3065.

2,2'-((Azanediylbis(ethane-2,1-diyl))bis(oxy))bis(ethan-1-ol) (QX3061)

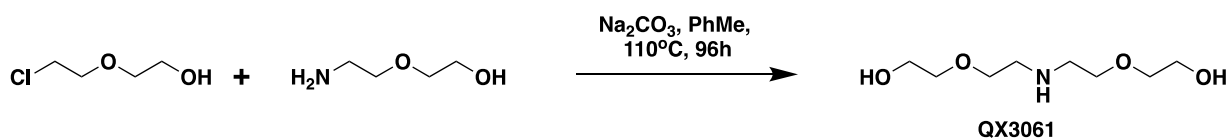

Add a solution of 2-(2-chloroethoxy)ethanol (6.4 mL, 60 mmol) in toluene (15 mL) dropwise to a stirred refluxing mixture of 2-(2-aminoethoxy)ethanol (24 mL, 240 mmol) and  $Na_2CO_3$  (7 g, 66 mmol) in toluene (150 mL) in a flask fitted with Dean-Stark apparatus. Then the mixture was heated to 120 Celsius degree for 4 days. The solids were removed by filtration after the mixture was cooled to room temperature. The residue was washed by ether and the combined filtrates were concentrated in vacuo. The crude residue was purified by distillation. MS(ESI-TOF)  $m/z$  calc. for  $C_8H_{20}NO_4^+$  194.14, found 194.14  $[M+H^+]$ .  $^1H$  NMR (300 MHz, Chloroform-*d*)  $\delta$  3.72 (t,  $J$  = 4 Hz, 4H), 3.66-3.60 (m, 8H), 2.86 (t,  $J$  = 5.1 Hz, 1H).  $^{13}C$  NMR (126 MHz, Chloroform-*d*) 72.71, 69.79, 61.63, 48.94.

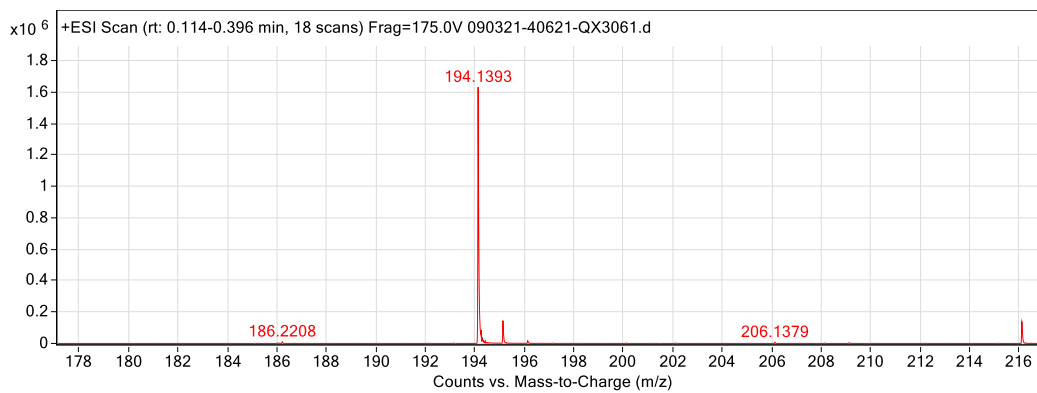

Figure S179. ESI-TOF MS data for QX3061.

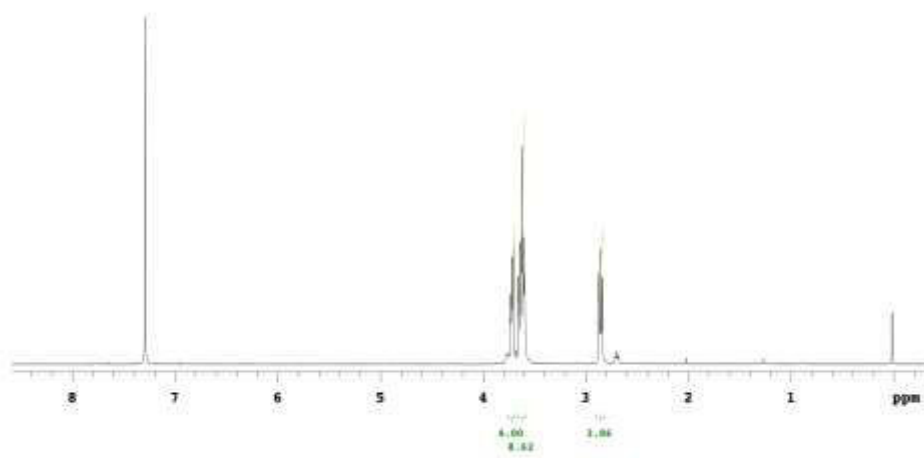

Figure S180. <sup>1</sup>H NMR data for QX3061.

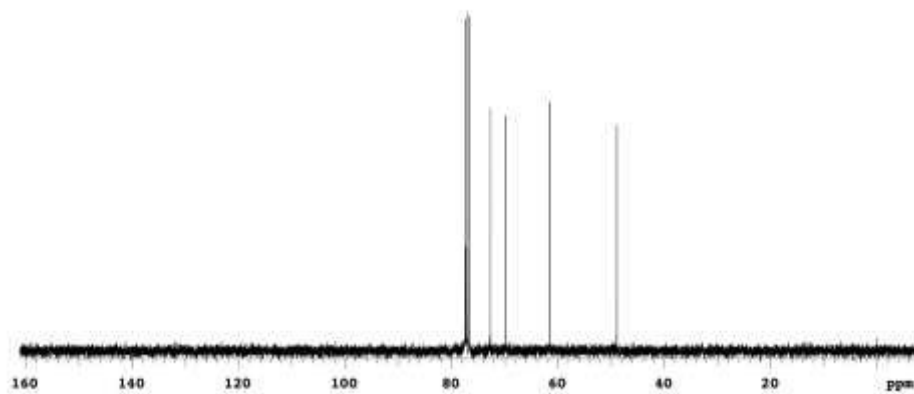

Figure S181. <sup>13</sup>C NMR for QX3061.

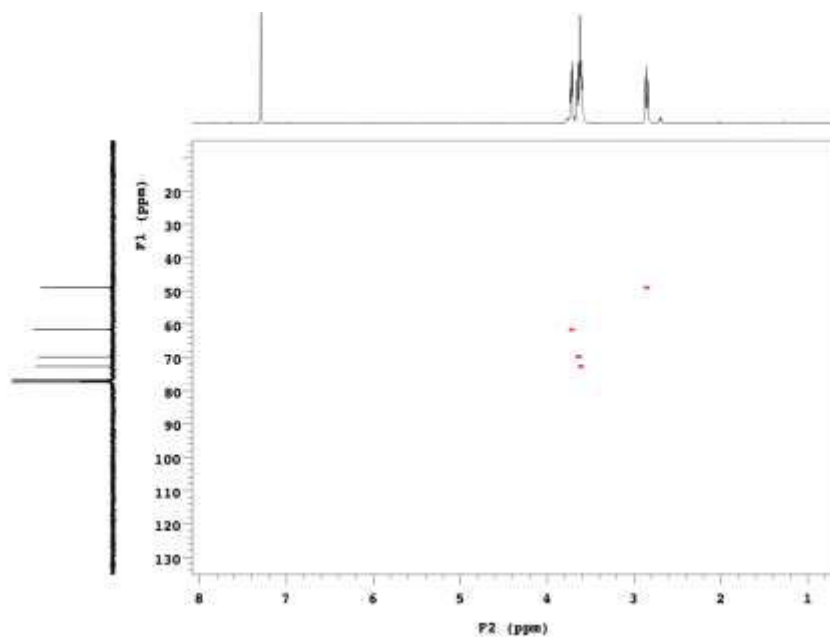

Figure S182. HSQC for QX3061.

15-Oxo-16-(2-(2-(tosyloxy)ethoxy)ethyl)-2,5,8,11,14,19-hexaoxa-16-azahenicosan-21-yl 4-methylbenzenesulfonate (QX3072)

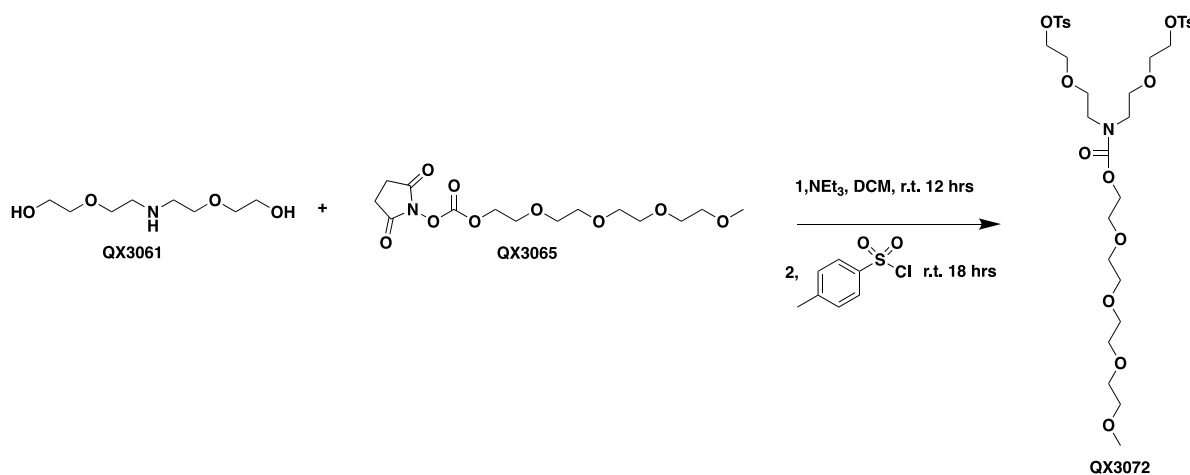

QX3065 (525 mg, 1.5 mmol) was added to a mixture of QX3061 (193 mg, 1.0 mmol) and TEA (415  $\mu$ L, 3.0 mmol) in DCM (5 mL) at room temperature. Then the mixture was stirred at room temperature for 12 hours. Then additional TEA (276  $\mu$ L, 2.0 mmol) was added to the mixture followed by 762 mg of TsCl (4.0 mmol). The reaction was stirred at room temperature for another 18 hours. Then the reaction was quenched with water, and the organic layer was further washed with sodium bicarbonate (5%) and brine. The crude was purified by chromatography (pure EA as mobile phase). MS(ESI-TOF)  $m/z$  calc. for  $C_{32}H_{52}N_2O_{14}S_2^+$  753.29, found 753.29  $[M+NH_4^+]$ .  $^1H$  NMR (300 MHz, Chloroform- $d$ )  $\delta$  7.82 (t,  $J$  = 8.1 Hz, 4H), 7.37 (t,  $J$  = 8.1 Hz, 4H), 4.23 (t,  $J$  = 5.1 Hz, 2H), 4.16 (t,  $J$  = 4.5 Hz, 4H), 3.71-3.65 (m, 16H), 3.58-3.52 (m, 6H), 3.42 (t,  $J$  = 5.4 Hz, 4H), 3.40 (s, 3H) 2.47 (s, 6H).  $^{13}C$  NMR (126 MHz, Chloroform- $d$ ) 156.05, 144.90, 132.93, 129.91, 127.97, 71.94, 70.61, 70.59, 70.54, 70.44, 70.01, 69.72, 69.51, 69.24, 68.44, 68.34, 67.45, 59.07, 48.20, 47.75, 21.69.

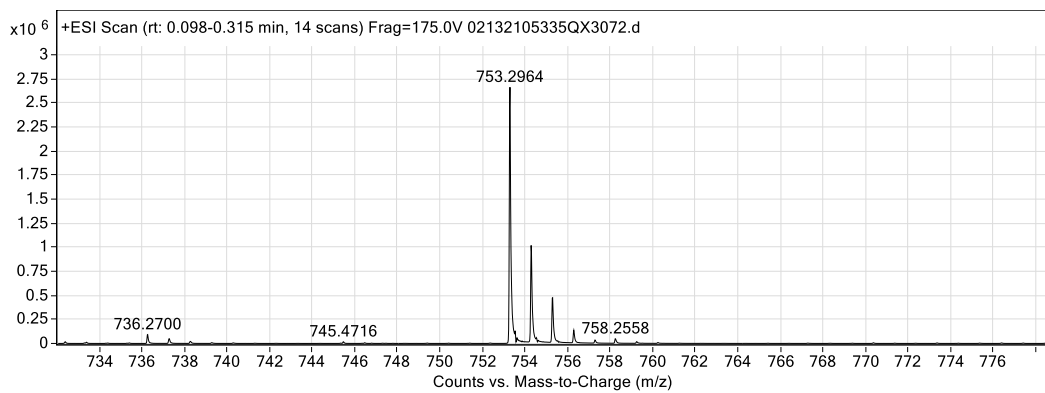

Figure S183. ESI-TOF MS data for QX3072.

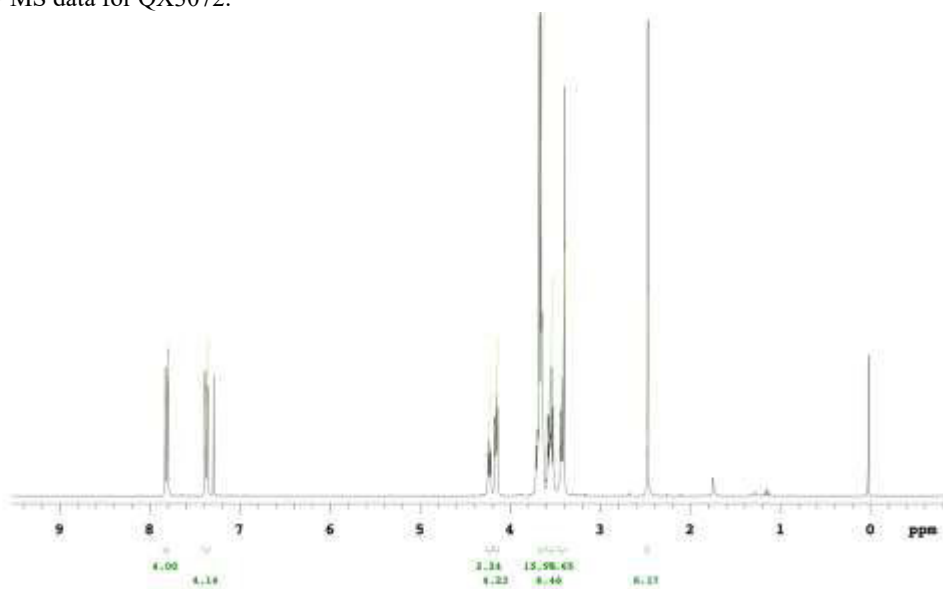

Figure S184. <sup>1</sup>H NMR data for QX3072.

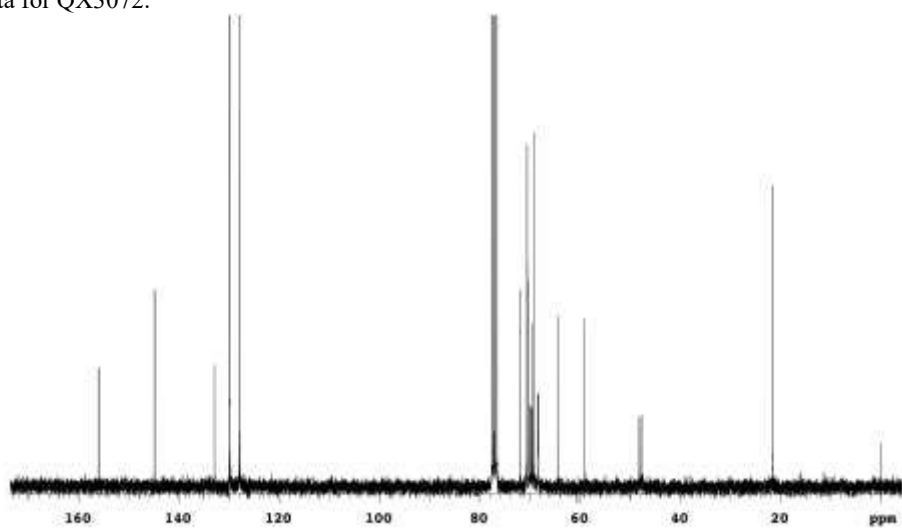

Figure S185. <sup>13</sup>C NMR data for QX3072

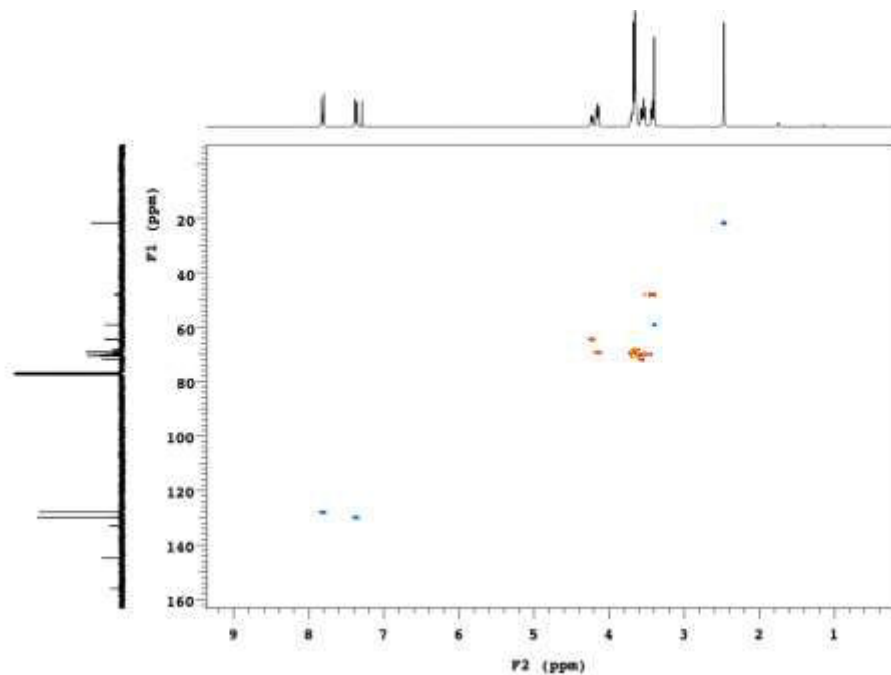

Figure S186. HSQC data for QX3072.

2,5,8,11-Tetraoxatridecan-13-yl bis(2-(2-azidoethoxy)ethyl)carbamate (QX3075)

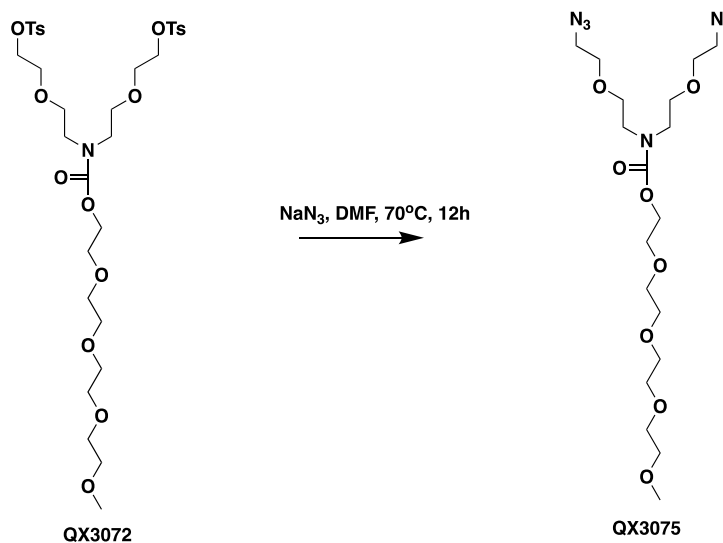

To a solution of  $\text{NaN}_3$  (77 mg, 1.2 mmol) in DMF (2 mL) was added QX3072 (219 mg, 0.29 mmol) at room temperature. The reaction mixture was heated to 70 Celsius degree and stirred for 12 hours. The crude mixture was diluted with 4 mL of water and extracted with DCM (2 mL) for 3 times. The combined organic phases were washed with saturated brine and dried over anhydrous sodium sulfate, filtered, and the solvent was removed by rotary evaporation to afford 138 mg of product as colorless oil. Yield quantitative. MS(ESI-TOF)  $m/z$  calc. for  $\text{C}_{18}\text{H}_{39}\text{N}_8\text{O}_8^+$  495.29, found 495.29  $[\text{M}+\text{NH}_4^+]$ .  $^1\text{H}$  NMR (300 MHz, Chloroform-*d*)  $\delta$  4.23 (t,  $J = 5.1$  Hz, 2H), 3.69 (t,  $J = 4.5$  Hz, 2H), 3.66-3.61 (m, 18H), 3.55-3.54 (m, 6H), 3.38 (s, 3H), 3.37-3.35 (m, 4H),  $^{13}\text{C}$  NMR (126 MHz, Chloroform-*d*) 156.05, 71.93, 70.61, 70.53, 70.44, 69.92, 69.86, 69.78, 69.66, 69.53, 64.41, 59.03, 50.77, 48.37, 47.94.



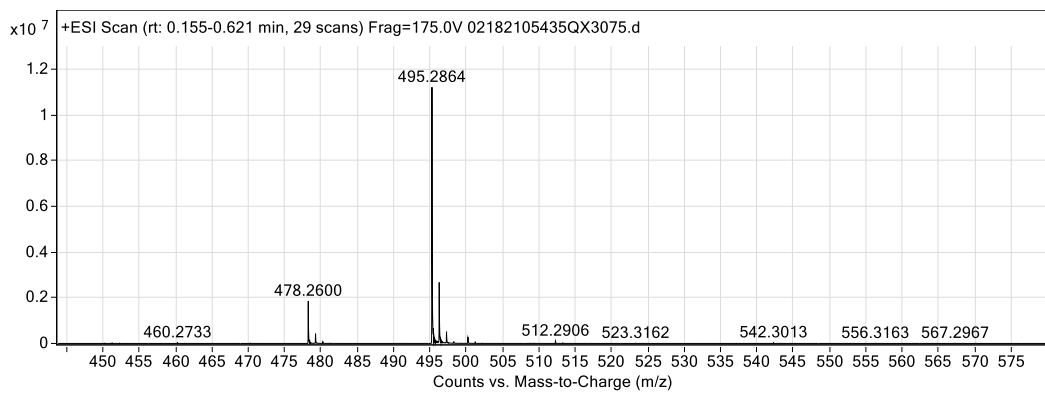

Figure S187. ESI-TOF MS data for QX3075.

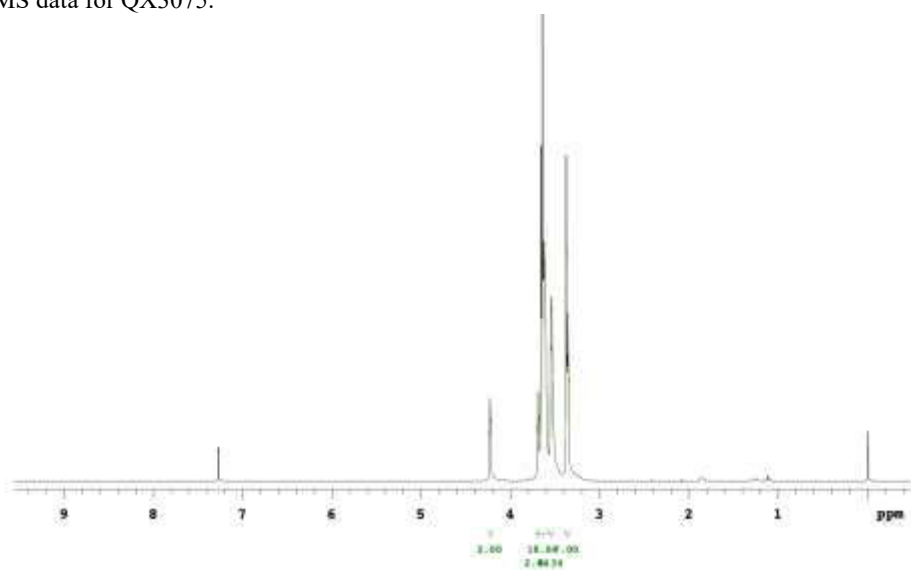

Figure S188. <sup>1</sup>H NMR data for QX3075.

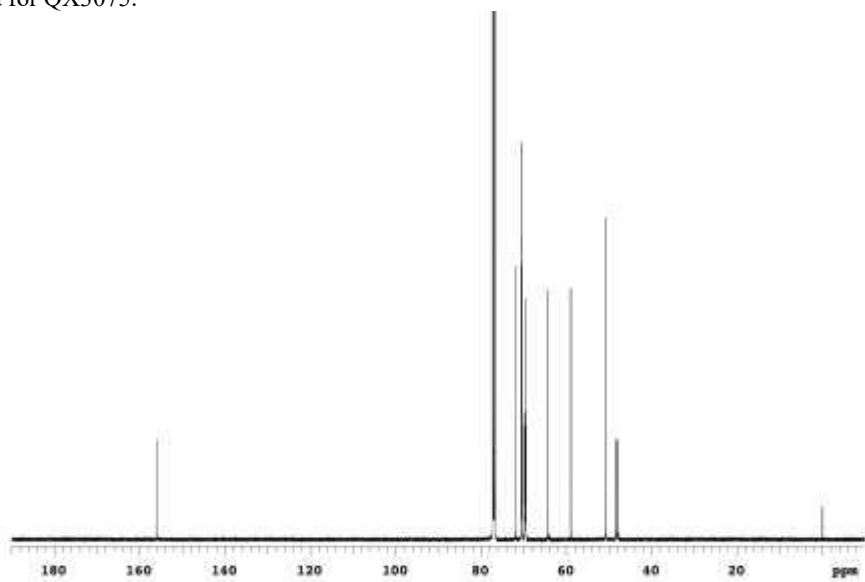

Figure S189. <sup>13</sup>C NMR data for QX3075.

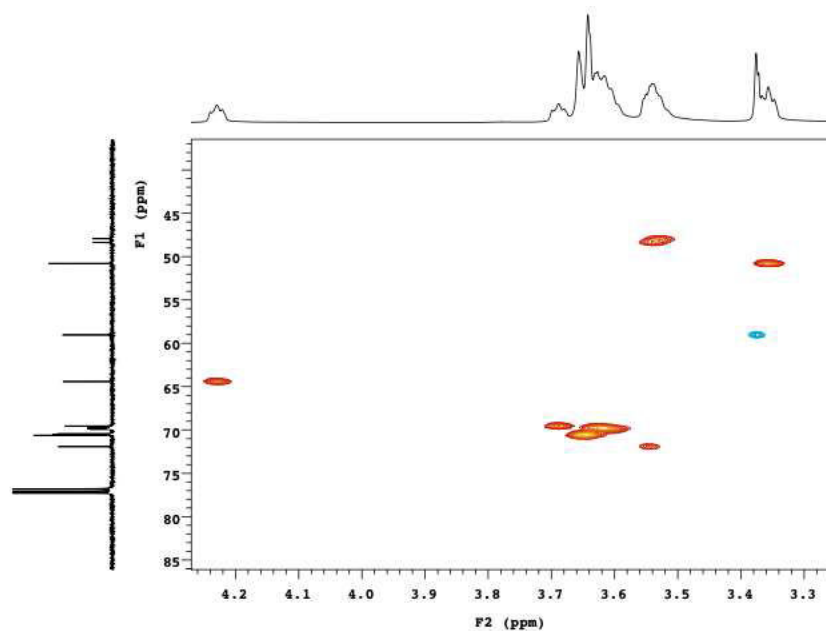

Figure S190. HSQC data for QX3075.

#### ESI References

1. Q. Xiao, D. S. Ashton, Z. B. Jones, K. P. Thompson and J. L. Price, *RSC Chem. Biol.*, 2020, **1**, 273–280.
2. P. B. Lawrence, Y. Gavrillov, S. S. Matthews, M. I. Langlois, D. Shental-Bechor, H. M. Greenblatt, B. K. Pandey, M. S. Smith, R. Paxman, C. D. Torgerson, J. P. Merrell, C. C. Ritz, M. B. Prigozhin, Y. Levy and J. L. Price, *J Am Chem Soc*, 2014, **136**, 17547-17560.
3. M. S. Smith, W. M. Billings, F. G. Whitby, M. B. Miller and J. L. Price, *Org. Biomol. Chem.*, 2017, **15**, 5882–5886.
4. D. Y. Jackson, D. S. King, J. Chmielewski, S. Singh and P. G. Schultz, *Journal of the American Chemical Society*, 1991, **113**, 9391-9392.
5. A. M. Leduc, J. O. Trent, J. L. Wittliff, K. S. Bramlett, S. L. Briggs, N. Y. Chirgadze, Y. Wang, T. P. Burris and A. F. Spatola, *P Natl Acad Sci USA*, 2003, **100**, 11273-11278.
6. C. E. Schafmeister, J. Po and G. L. Verdine, *Journal of the American Chemical Society*, 2000, **122**, 5891-5892.
7. L. D. Walensky, A. L. Kung, I. Escher, T. J. Malia, S. Barbuto, R. D. Wright, G. Wagner, G. L. Verdine and S. J. Korsmeyer, *Science*, 2004, **305**, 1466-1470.
